# Supplementary material for: Discovery of a small molecule that inhibits bacterial ribosome biogenesis
Source: eLife. 2014 Sep 18;3:e03574. doi: 10.7554/eLife.03574 (PMC4371806; doi:10.7554/eLife.03574)
Supplement: Figure 1—source data 1. — Cold sensitivity factors for each strain were normalized to 1, based on the mean of all cold sensitivity factors calculated. DOI: http://dx.doi.org/10.7554/eLife.03574.004 [file elife03574s001.xlsx]

## Sheet: Figure 1 - source data 1
Figure 1 - source data 1. Screen of the E. coli Keio collection.
Cold senstivity factors for each strain were normalized to 1, based on the mean of all cold senstivity factors calculated.
JW ID	Blattner number	Gene name	37-R1	37-R2	15-R1	15-R2	Cold sensitivity factor
JW1950	B1967	hchA	0.593	0.569	0.115	0.133	1.4329
JW3122		yhbO	0.428	0.412	0.125	0.127	1.0194
JW2201	B2213	ada	0.232	0.223	0.028	0.025	2.6254
JW4077	B4116	adiY	0.58	0.565	0.109	0.119	1.5358
JW0553	B0564	appY	0.296	0.287	0.016	0.015	5.7512
JW3206	B3237	argR	0.433	0.418	0.114	0.087	1.2947
JW3721	B3743	asnC	0.315	0.321	0.01	0.01	9.7248
JW0305	B0313	betI	0.583	0.574	0.07	0.063	2.6603
JW3701	B3723	bglG	0.558	0.534	0.155	0.162	1.0535
JW1262	B1270	btuR	0.491	0.497	0.155	0.148	0.9972
JW4094	B4133	cadC	0.511	0.509	0.128	0.125	1.2329
JW1966	B1987	cbl	0.47	0.476	0.148	0.14	1.0045
JW1724	B1735	celD	0.505	0.509	0.166	0.127	1.0583
JW3320		crp	0.569	0.558	0.174	0.155	1.0476
JW1023	B1040	csgD	0.53	0.531	0.135	0.128	1.2337
JW0329		cynR	0.56	0.552	0.112	0.105	1.5671
JW3905	B3934	cytR	0.573	0.571	0.182	0.175	0.98
JW0824	B0840	deoR	0.494	0.491	0.163	0.163	0.924
JW2361	B2364	dsdC	0.55	0.539	0.149	0.148	1.1213
JW3046	B3075	ebgR	0.568	0.575	0.18	0.155	1.0434
JW3232	B3264	envR	0.458	0.462	0.092	0.082	1.6169
JW0555	B0566	envY	0.451	0.459	0.151	0.139	0.9596
JW1176	B1187	fadR	0.561	0.552	0.193	0.185	0.9004
JW3229	B3261	fis	0.512	0.5	0.066	0.057	2.5161
JW1328	B1334	fnr	0.568	0.547	0.146	0.154	1.1366
JW2776	B2805	fucR	0.532	0.522	0.166	0.155	1.0041
JW2805	B2837	galR	0.528	0.532	0.171	0.183	0.9157
JW2138	B2151	galS	0.554	0.553	0.176	0.156	1.0197
JW2071		gatR	0.535	0.526	0.187	0.153	0.9543
JW0895	B0912	ihfB	0.541	0.536	0.204	0.168	0.8854
JW1225	B1237	hns	0.508	0.502	0.193	0.179	0.8303
JW3964	B4000	hupA	0.56	0.557	0.155	0.167	1.0608
JW0430	B0440	hupB	0.561	0.553	0.165	0.163	1.0386
JW2883	B2916	iciA	0.519	0.516	0.185	0.17	0.8916
JW4221	B4264	idnR	0.531	0.521	0.159	0.15	1.0411
JW3746	B3773	ilvY	0.534	0.533	0.186	0.157	0.9513
JW0075	B0076	leuO	0.516	0.515	0.181	0.153	0.944
JW0872	B0889	lrp	0.544	0.54	0.168	0.136	1.0905
JW2807	B2839	lysR	0.517	0.517	0.179	0.148	0.967
JW1612	B1620	malI	0.588	0.573	0.168	0.19	0.9917
JW1524		marA	0.556	0.539	0.125	0.113	1.407
JW1523		marR	0.508	0.505	0.175	0.153	0.9445
JW4079	B4118	melR	0.543	0.529	0.155	0.14	1.1113
JW3909	B3938	metJ	0.544	0.544	0.14	0.124	1.2603
JW3804	B3828	metR	0.502	0.509	0.163	0.143	1.0104
JW0337	B0346	mhpR	0.526	0.526	0.175	0.157	0.969
JW1967	B1988	nac	0.526	0.525	0.183	0.152	0.9594
JW4353		nadR	0.477	0.475	0.086	0.098	1.5822
JW0662	B0676	nagC	0.596	0.589	0.164	0.171	1.0817
JW3195	B3226	nanR	0.532	0.524	0.167	0.177	0.9388
JW0019	B0020	nhaR	0.525	0.528	0.172	0.173	0.9334
JW0109	B0113	pdhR	0.525	0.519	0.18	0.155	0.953
JW0244	B0254	perR	0.519	0.514	0.137	0.112	1.2687
JW4063	B4102	phnF	0.542	0.536	0.213	0.157	0.891
JW3736			0.552	0.541	0.187	0.141	1.0191
JW1650	B1658	purR	0.575	0.567	0.161	0.218	0.9215
JW3877	B3906	rhaR	0.554	0.547	0.174	0.169	0.9816
JW1634		slyA	0.551	0.547	0.161	0.164	1.0332
JW4024	B4063	soxR	0.522	0.515	0.16	0.175	0.9466
JW4023	B4062	soxS	0.526	0.522	0.162	0.169	0.9682
JW2644	B2669	stpA	0.529	0.52	0.175	0.16	0.9576
JW3089	B3118	tdcA	0.541	0.541	0.173	0.17	0.9647
JW4200	B4241	treR	0.521	0.521	0.237	0.186	0.7533
JW4356	B4393	trpR	0.587	0.585	0.225	0.212	0.8202
JW1316	B1323	tyrR	0.549	0.542	0.197	0.2	0.8404
JW1610	B1618	uidR	0.409	0.392	0.086	0.076	1.5121
JW4287	B4324	uxuR	0.343	0.355	0.104	0.088	1.1117
JW2396	B2405	xapR	0.53	0.522	0.162	0.171	0.9661
JW3254	B3292	zntR	0.499	0.497	0.161	0.152	0.9731
JW0198	B0208	yafC	0.556	0.545	0.175	0.145	1.0522
JW0596	B0603	ybdO	0.548	0.543	0.193	0.165	0.932
JW0624	B0629	ybeF	0.577	0.573	0.198	0.167	0.9635
JW2206	B2218	(rcsC)	0.429	0.413	0.029	0.024	4.8583
JW2977			0.532	0.526	0.155	0.157	1.037
JW0078	B0080	fruR	0.542	0.534	0.171	0.173	0.9565
JW1702	B1712	ihfA	0.517	0.512	0.153	0.155	1.0217
JW3732	B3753	rbsR	0.51	0.507	0.137	0.136	1.1392
JW1901	B1916	sdiA	0.531	0.518	0.18	0.166	0.9272
JW2676	B2707	srlR	0.587	0.596	0.162	0.15	1.1595
JW0007	B0008	talB	0.554	0.539	0.212	0.187	0.8377
JW0111	B0115	aceF	0.57	0.566	0.215	0.212	0.8136
JW0114	B0118	acnB	0.492	0.488	0.173	0.158	0.9054
JW0324	B0333	prpC	0.482	0.479	0.142	0.135	1.061
JW0419	B0429	cyoD	0.547	0.54	0.145	0.176	1.0356
JW0420	B0430	cyoC	0.5	0.502	0.149	0.15	1.0248
JW0421	B0431	cyoB	0.549	0.553	0.144	0.14	1.1866
JW0422	B0432	cyoA	0.506	0.498	0.157	0.154	0.9872
JW0506	B0518	fdrA	0.576	0.577	0.233	0.196	0.8219
JW0711	B0721	sdhC	0.589	0.592	0.189	0.212	0.9007
JW0712	B0722	sdhD	0.568	0.559	0.173	0.181	0.9736
JW0713	B0723	sdhA	0.531	0.526	0.163	0.177	0.9507
JW0714	B0724	sdhB	0.58	0.575	0.185	0.196	0.9271
JW0715	B0726	sucA	0.576	0.565	0.174	0.181	0.9829
JW0716	B0727	sucB	0.578	0.57	0.174	0.172	1.0147
JW0717	B0728	sucC	0.579	0.576	0.19	0.187	0.9369
JW0739	B0756	galM	0.605	0.601	0.221	0.195	0.8866
JW0807	B0823	ybiW	0.557	0.551	0.152	0.162	1.0725
JW0809		fsaA	0.56	0.569	0.177	0.186	0.9453
JW0885	B0902	pflA	0.546	0.554	0.207	0.206	0.8096
JW0886	B0903	pflB	0.575	0.574	0.181	0.182	0.9621
JW0951		yccX	0.588	0.596	0.188	0.236	0.8488
JW0960	B0978	appC	0.537	0.54	0.161	0.177	0.9685
JW0961	B0979	appB	0.581	0.587	0.152	0.148	1.1834
JW1122	B1136	icd	0.562	0.555	0.189	0.211	0.8488
JW1228	B1241	adhE	0.509	0.5	0.074	0.085	1.9288
JW1268	B1276	acnA	0.543	0.536	0.174	0.184	0.9161
JW1413	B1416	gapC	0.563	0.569	0.157	0.182	1.015
JW1414		(gapC)	0.55	0.554	0.139	0.19	1.0199
JW1475		sfcA	0.541	0.547	0.148	0.192	0.9726
JW1603	B1611	fumC	0.598	0.605	0.157	0.16	1.1535
JW1604	B1612	fumA	0.52	0.523	0.154	0.18	0.9492
JW1666	B1676	pykF	0.565	0.559	0.11	0.124	1.46
JW1692	B1702	ppsA	0.408	0.412	0.121	0.131	0.989
JW1712		pfkB	0.396	0.396	0.111	0.111	1.0844
JW1841	B1852	zwf	0.576	0.566	0.156	0.169	1.068
JW1843	B1854	pykA	0.541	0.547	0.175	0.185	0.9186
JW2011	B2029	gnd	0.571	0.572	0.169	0.18	0.9955
JW2198	B2210	mqo	0.538	0.539	0.14	0.141	1.165
JW2271	B2276	nuoN	0.575	0.584	0.146	0.163	1.1401
JW2272	B2277	nuoM	0.587	0.588	0.13	0.135	1.3477
JW2273	B2278	nuoL	0.362	0.368	0.069	0.088	1.4133
JW2274	B2279	nuoK	0.346	0.34	0.103	0.115	0.9565
JW2275	B2280	nuoJ	0.381	0.382	0.114	0.127	0.9623
JW2276	B2281	nuoI	0.366	0.366	0.115	0.121	0.9428
JW2277	B2282	nuoH	0.397	0.4	0.104	0.128	1.0442
JW2278	B2283	nuoG	0.354	0.36	0.104	0.116	0.9865
JW2279	B2284	nuoF	0.39	0.389	0.092	0.106	1.1958
JW2280	B2285	nuoE	0.395	0.388	0.085	0.101	1.2795
JW2282		nuoB	0.3429	0.3631	-0.0894	-0.0719	-1.3304
JW2283	B2288	nuoA	0.3157	0.3323	-0.1094	-0.112	-0.8896
JW2385	B2388	glk	0.6059	0.6427	0.0301	0.027	6.6465
JW2447	B2463	maeB	0.6674	0.671	0.0079	0.0055	30.3588
JW2448	B2464	talA	0.6946	0.6091	-0.0243	-0.0448	-5.7346
JW2449	B2465	tktB	0.6755	0.6724	0.0243	0.0211	9.0241
JW0563	B0574	cusB	0.5989	0.6073	-0.0215	-0.1034	-2.9354
JW2943	B2976	glcB	0.7471	0.7285	-0.0007	-0.028	-15.6275
JW3205	B3236	mdh	0.606	0.609	0.19	0.202	0.9421
JW3343	B3380	yhfW	0.563	0.559	0.171	0.17	1.0001
JW3349	B3386	rpe	0.557	0.558	0.128	0.129	1.3187
JW3366	B3403	pckA	0.52	0.519	0.135	0.144	1.1319
JW3587	B3612	gpmI	0.548	0.547	0.167	0.173	0.9789
JW3887	B3916	pfkA	0.487	0.487	0.101	0.1	1.4729
JW3890	B3919	tpiA	0.565	0.56	0.177	0.197	0.9143
JW3918	B3946	fsaB	0.425	0.421	0.166	0.18	0.7432
JW3923	B3951	pflD	0.581	0.585	0.203	0.214	0.8499
JW3924	B3952	pflC	0.579	0.579	0.16	0.168	1.0731
JW3928	B3956	ppc	0.462	0.458	0.129	0.127	1.0923
JW3974	B4014	aceB	0.539	0.54	0.15	0.168	1.0313
JW3975	B4015	aceA	0.524	0.524	0.139	0.168	1.0376
JW3985	B4025	pgi	0.573	0.573	0.175	0.173	1.0009
JW4051	B4090	rpiB	0.533	0.533	0.195	0.189	0.8438
JW4083	B4122	fumB	0.571	0.575	0.241	0.258	0.6981
JW4112	B4151	frdD	0.549	0.563	0.201	0.213	0.8164
JW4113	B4152	frdC	0.517	0.517	0.128	0.138	1.1815
JW4114	B4153	frdB	0.527	0.531	0.158	0.173	0.9715
JW4115	B4154	frdA	0.515	0.523	0.138	0.138	1.1431
JW4346	B4383	deoB	0.522	0.522	0.147	0.15	1.0684
JW4358	B4395	gpmB	0.465	0.467	0.114	0.113	1.2479
JW0389	B0399	phoB	0.538	0.536	0.152	0.181	0.9803
JW0390	B0400	phoR	0.537	0.539	0.204	0.237	0.7416
JW0559		cusS	0.55	0.557	0.164	0.186	0.9614
JW0611	B0619	dpiB	0.513	0.511	0.182	0.196	0.8234
JW0612	B0620	dpiA	0.474	0.466	0.145	0.151	0.9653
JW0682		kdpE	0.503	0.502	0.119	0.138	1.1886
JW0683	B0695	kdpD	0.486	0.481	0.13	0.157	1.0241
JW0797	B0812	dps	0.538	0.547	0.164	0.153	1.0403
JW0978		torS	0.53	0.548	0.18	0.183	0.9026
JW0980	B0995	torR	0.555	0.557	0.172	0.183	0.9521
JW1115	B1129	phoQ	0.486	0.48	0.153	0.153	0.9595
JW1116	B1130	phoP	0.526	0.525	0.153	0.152	1.0474
JW1212	B1221	narL	0.531	0.537	0.21	0.213	0.7674
JW1213	B1222	narX	0.536	0.538	0.125	0.139	1.2365
JW1223	B1235	hnr	0.503	0.502	0.137	0.145	1.0832
JW1600	B1608	rstA	0.485	0.5	0.155	0.147	0.9914
JW1601	B1609	rstB	0.481	0.491	0.144	0.136	1.0551
JW1871	B1882	cheY	0.543	0.548	0.223	0.244	0.7101
JW1872	B1883	cheB	0.584	0.595	0.175	0.174	1.0268
JW1877	B1888	cheA	0.559	0.548	0.185	0.17	0.9478
JW1899	B1914	uvrY	0.545	0.533	0.151	0.178	0.9959
JW1951	B1968	yedV	0.515	0.518	0.148	0.155	1.0362
JW1952		yedW	0.549	0.55	0.156	0.187	0.9739
JW2063	B2078	baeS	0.532	0.543	0.151	0.149	1.0892
JW2181	B2193	narP	0.528	0.538	0.169	0.173	0.9474
JW2205	B2217	rcsB	0.56	0.558	0.218	0.256	0.7169
JW2213	B2219	atoS	0.614	0.624	0.131	0.161	1.2887
JW2214	B2220	atoC	0.572	0.576	0.145	0.168	1.1148
JW2366	B2369	evgA	0.55	0.556	0.165	0.185	0.9605
JW2367	B2370	evgS	0.576	0.576	0.147	0.152	1.1711
JW2453	B2469	narQ	0.561	0.562	0.165	0.157	1.0601
JW2538	B2554	yfhA	0.585	0.588	0.164	0.177	1.0456
JW2540		yfhK	0.563	0.554	0.181	0.197	0.8982
JW2711		rpoS	0.558	0.565	0.185	0.191	0.9078
JW2757	B2786	barA	0.563	0.556	0.177	0.162	0.9913
JW2993	B3025	qseB	0.564	0.562	0.166	0.172	1.0004
JW2994	B3026	qseC	0.541	0.533	0.165	0.163	0.9833
JW3169	B3202	rpoN	0.564	0.568	0.158	0.165	1.0524
JW3177		arcB	0.585	0.577	0.152	0.155	1.1366
JW3368	B3405	ompR	0.567	0.569	0.172	0.163	1.0183
JW3624	B3649	rpoZ	0.571	0.584	0.184	0.175	0.9661
JW3643	B3668	uhpB	0.631	0.62	0.26	0.243	0.7469
JW3644	B3669	uhpA	0.567	0.571	0.188	0.183	0.9211
JW3839	B3868	glnG	0.556	0.547	0.137	0.135	1.2178
JW3840	B3869	glnL	0.521	0.513	0.131	0.141	1.1416
JW3882	B3911	cpxA	0.549	0.542	0.149	0.155	1.0777
JW3883	B3912	cpxR	0.575	0.566	0.156	0.157	1.0947
JW3967	B4003	zraS	0.562	0.549	0.175	0.165	0.9813
JW3968	B4004	zraR	0.531	0.547	0.156	0.157	1.0343
JW4073	B4112	basS	0.587	0.571	0.237	0.229	0.7462
JW4074	B4113	basR	0.587	0.582	0.196	0.2	0.8865
JW4085	B4124	dcuR	0.566	0.555	0.151	0.162	1.0755
JW4086	B4125	dcuS	0.556	0.534	0.161	0.161	1.0165
JW4361	B4398	creB	0.533	0.53	0.056	0.059	2.7758
JW4362	B4399	creC	0.463	0.473	0.072	0.088	1.7568
JW4364	B4401	arcA	0.552	0.54	0.167	0.166	0.9848
JW3021	B3049	glgS	0.542	0.53	0.183	0.166	0.9224
JW1885		otsA	0.567	0.562	0.212	0.206	0.8111
JW1186	B1197	treA	0.335	0.337	0.084	0.077	1.2534
JW2034	B2049	manC	0.241	0.235	0.016	0.015	4.6111
JW3730	B3751	rbsB	0.506	0.491	0.128	0.132	1.1515
JW1235	B1243	oppA	0.546	0.532	0.157	0.159	1.0244
JW3077	B3106	yhaK	0.529	0.525	0.154	0.147	1.0515
JW1644	B1652	rnt	0.546	0.529	0.178	0.154	0.9724
JW3133			0.515	0.512	0.169	0.153	0.9578
JW2294	B2297	pta	0.584	0.581	0.186	0.157	1.02
JW0855	B0871	poxB	0.574	0.567	0.188	0.198	0.8877
JW1375	B1380	ldhA	0.505	0.501	0.114	0.113	1.3308
JW2121	B2133	dld	0.579	0.575	0.123	0.141	1.3127
JW3580	B3605	lldD	0.545	0.535	0.154	0.174	0.9888
JW0675	B0688	pgm	0.49	0.475	0.15	0.148	0.9724
JW0710	B0720	gltA	0.511	0.501	0.018	0.016	8.9384
JW0723	B0734	cydB	0.497	0.499	0.169	0.166	0.8928
JW2881		rpiA	0.586	0.573	0.281	0.24	0.668
JW2902		tktA	0.593	0.585	0.175	0.192	0.9639
JW2334	B2337	(yfcU)	0.568	0.564	0.156	0.158	1.0826
JW2342	B2345	yfdF	0.567	0.556	0.163	0.168	1.0188
JW2348		yfdI	0.567	0.546	0.151	0.152	1.1031
JW0564	B0575	cusA	0.535	0.528	0.144	0.155	1.0676
JW1771	B1782	mipA	0.552	0.55	0.175	0.177	0.9401
JW0146	B0150	fhuA	0.538	0.537	0.187	0.181	0.8772
JW3703	B3725	pstB	0.593	0.596	0.25	0.249	0.7155
JW0401	B0411	tsx	0.559	0.558	0.209	0.237	0.7521
JW2096	B2109	yehB	0.544	0.549	0.163	0.158	1.0225
JW2044	B2059	wcaA	0.543	0.546	0.148	0.149	1.1011
JW3016		yqiG	0.511	0.516	0.145	0.141	1.0784
JW3017			0.543	0.54	0.131	0.154	1.1411
JW3285	B3323	gspA	0.56	0.549	0.162	0.142	1.0955
JW3354	B3391	hofQ	0.548	0.545	0.185	0.19	0.8753
JW3454	B3487	yhiI	0.53	0.524	0.195	0.173	0.8601
JW3043	B3072	aer	0.467	0.465	0.104	0.097	1.3924
JW1874	B1885	tap	0.47	0.467	0.049	0.053	2.7586
JW3131		deaD	0.471	0.472	0.141	0.129	1.0488
JW0945	B0962	helD	0.349	0.356	0.124	0.128	0.8401
JW1410		hrpA	0.532	0.529	0.151	0.169	0.9957
JW0764	B0781	moaA	0.552	0.551	0.161	0.149	1.0685
JW0117	B0121	speE	0.555	0.554	0.194	0.163	0.9329
JW0530	B0542	JW0530	0.53	0.531	0.259	0.235	0.645
JW0100	B0103	coaE	0.617	0.621	0.11	0.131	1.5426
JW0243	B0253	ykfA	0.523	0.531	0.01	0.01	15.8258
JW0299		ykgE	0.335	0.338	0.003	0.001	50.5255
JW0301		ykgG	0.544	0.542	0.143	0.146	1.1285
JW0318	B0326	yahL	0.535	0.536	0.175	0.169	0.9349
JW0110	B0114	aceE	0.533	0.534	0.162	0.159	0.9982
JW0112	B0116	lpdA	0.556	0.552	0.192	0.172	0.9141
JW4191	B4232	fbp	0.53	0.528	0.208	0.202	0.7749
JW0560	B0571	cusR	0.571	0.569	0.23	0.234	0.7378
JW3367	B3404	envZ	0.534	0.545	0.169	0.158	0.9909
JW3393	B3430	glgC	0.482	0.474	0.112	0.116	1.2592
JW2486	B2501	ppk	0.529	0.527	0.15	0.14	1.0935
JW2293	B2296	ackA	0.56	0.557	0.142	0.145	1.1688
JW2369	B2372	yfdV	0.547	0.547	0.175	0.16	0.9807
JW2373	B2376	ypdI	0.565	0.57	0.192	0.19	0.8923
JW2421	B2428	yfeU	0.582	0.579	0.195	0.204	0.8738
JW2494		yfgJ	0.567	0.564	0.175	0.182	0.9514
JW2497	B2513	yfgM	0.537	0.531	0.167	0.188	0.9034
JW2534		yphH	0.556	0.552	0.159	0.168	1.0175
JW2574			0.469	0.46	0.147	0.147	0.9489
JW2585	B2604	yfiN	0.345	0.352	0.025	0.022	4.4534
JW2606			0.594	0.598	0.148	0.152	1.1932
JW2616			0.545	0.547	0.177	0.212	0.843
JW2621	B2640	(yfjV)	0.557	0.564	0.275	0.286	0.6001
JW2622		(yfjV)	0.599	0.586	0.234	0.239	0.7523
JW2629	B2649	ypjB	0.565	0.538	0.165	0.154	1.0383
JW2630		ypjC	0.513	0.51	0.19	0.192	0.8042
JW2632		JW5426	0.61	0.605	0.179	0.166	1.0576
JW2633	B2658	yqaD	0.503	0.493	0.159	0.143	0.9904
JW2678			0.551	0.551	0.195	0.21	0.8171
JW0449	B0460	hha	0.546	0.543	0.266	0.264	0.617
JW1058	B1071	flgM	0.586	0.583	0.266	0.285	0.6371
JW3959	B3995	rsd	0.578	0.566	0.156	0.125	1.3304
JW4253	B4293	fecI	0.554	0.552	0.17	0.15	1.1295
JW2556	B2572	rseA	0.512	0.51	0.156	0.135	1.1477
JW4252	B4292	fecR	0.561	0.556	0.215	0.191	0.8991
JW1158		(ydeU)	0.547	0.539	0.194	0.159	1.0054
JW1656	B1664	ydhQ	0.496	0.502	0.003	0.002	65.2288
JW1982	B2000	flu	0.612	0.614	0.197	0.185	1.0488
JW1502	B1509	ydeU	0.524	0.523	0.164	0.147	1.1002
JW2142	B2155	cirA	0.558	0.545	0.133	0.112	1.4713
JW2931			0.548	0.548	0.182	0.163	1.0382
JW2784	B2813	mltA	0.532	0.54	0.191	0.202	0.8914
JW2671	B2701	mltB	0.501	0.513	0.16	0.144	1.09
JW2930		mltC	0.512	0.52	0.184	0.18	0.9265
JW0731	B0741	pal	0.478	0.486	0.001	0.002	105.011
JW1270	B1278	pgpB	0.416	0.001	0.002	0.004	22.7124
JW0554	B0565	ompT	0.584	0.591	0.201	0.205	0.9458
JW0755	B0772	ybhC	0.534	0.527	0.202	0.204	0.854
JW1010	B1024	ycdS	0.437	0.429	0.172	0.154	0.8681
JW3556	B3584	yiaT	0.457	0.458	0.211	0.207	0.7154
JW1795	B1806	yeaY	0.55	0.547	0.168	0.166	1.0733
JW3474	B3506	slp	0.459	0.462	0.003	0.003	50.1634
JW2628		ypjA	0.389	0.381	0.125	0.111	1.0662
JW0188	B0192	cutF	0.539	0.532	0.177	0.157	1.0479
JW2341	B2344	fadL	0.594	0.599	0.204	0.211	0.9394
JW0575		fepA	0.558	0.554	0.186	0.148	1.088
JW1088	B1102	fhuE	0.535	0.541	0.073	0.065	2.5481
JW0789		ybiX	0.519	0.528	0.186	0.179	0.9374
JW2462	B2477	nlpB	0.556	0.557	0.18	0.175	1.0246
JW0940	B0957	ompA	0.525	0.538	0.155	0.157	1.1134
JW2203	B2215	ompC	0.552	0.552	0.204	0.182	0.9347
JW0912	B0929	ompF	0.512	0.509	0.163	0.153	1.0559
JW1371	B1377	ompN	0.567	0.581	0.215	0.204	0.8954
JW2047	B2062	wza	0.567	0.571	0.21	0.171	0.9761
JW0790	B0805	ybiL	0.515	0.513	0.205	0.173	0.8888
JW0561	B0572	cusC	0.53	0.523	0.181	0.175	0.9666
JW3996	B4036	lamB	0.533	0.535	0.176	0.182	0.9749
JW1499	B1505	(fimD)	0.547	0.554	0.172	0.189	0.9967
JW4275	B4312	fimB	0.544	0.555	0.168	0.158	1.1017
JW4280		fimD	0.577	0.571	0.186	0.187	1.0058
JW4276	B4313	fimE	0.564	0.574	0.215	0.198	0.9005
JW0708		ybgQ	0.554	0.541	0.252	0.191	0.8078
JW3113	B3144	yraJ	0.544	0.54	0.192	0.17	0.9786
JW0219		fhiA	0.504	0.51	0.182	0.167	0.9495
JW1066		flgH	0.549	0.555	0.164	0.17	1.0802
JW2762	B2791	yqcB	0.523	0.539	0.175	0.164	1.0238
JW2815	B2847	yqeI	0.503	0.506	0.14	0.137	1.1904
JW2816		yqeJ	0.493	0.506	0.169	0.166	0.9745
JW2818	B2850	ygeF	0.556	0.555	0.238	0.219	0.7945
JW2821		ygeI	0.539	0.537	0.258	0.181	0.801
JW2824	B2856	(ygeK)	0.518	0.509	0.183	0.158	0.9842
JW2825		JW5460	0.523	0.516	0.162	0.137	1.1356
JW0120	B0124	gcd	0.547	0.545	0.166	0.161	1.0913
JW1415		cybB	0.434	0.395	0.106	0.103	1.2962
JW4195	B4236	cybC	0.519	0.537	0.17	0.187	0.9667
JW1957		yodB	0.547	0.557	0.183	0.197	0.9494
JW3896	B3925	glpX	0.543	0.578	0.161	0.175	1.0903
JW0751		ybhD	0.591	0.588	0.228	0.179	0.9467
JW1418		ydcI	0.396	0.377	0.175	0.17	0.7322
JW1788	B1799	yeaT	0.419	0.403	0.157	0.162	0.8421
JW2144	B2157	yeiE	0.463	0.469	0.177	0.177	0.8604
JW2888		ygfI	0.516	0.51	0.136	0.142	1.2061
JW3557	B3585	yiaU	0.532	0.531	0.175	0.177	0.9869
JW3689	B3711	yidZ	0.501	0.508	0.179	0.217	0.8327
JW4290	B4327	yjiE	0.575	0.585	0.213	0.227	0.8616
JW1587	B1595	ynfL	0.53	0.524	0.17	0.147	1.0866
JW1337	B1343	dbpA	0.521	0.534	0.173	0.175	0.9907
JW0058	B0059	hepA	0.478	0.49	0.183	0.184	0.862
JW0144	B0148	hrpB	0.486	0.501	0.187	0.166	0.9137
JW1645	B1653	lhr	0.544	0.559	0.166	0.17	1.0728
JW3753	B3780	rhlB	0.529	0.532	0.15	0.162	1.1113
JW2560	B2576	srmB	0.46	0.464	0.151	0.153	0.9933
JW1797	B1808	yoaA	0.546	0.569	0.232	0.232	0.7853
JW0104	B0108	ppdD	0.547	0.546	0.22	0.195	0.8607
JW0145	B0149	mrcB	0.518	0.531	0.165	0.165	1.0388
JW0157	B0161	degP	0.514	0.528	0.146	0.149	1.1543
JW0227	B0237	pepD	0.522	0.541	0.154	0.168	1.0788
JW0322	B0330	prpR	0.528	0.543	0.157	0.163	1.0938
JW0427	B0437	clpP	0.51	0.533	0.174	0.175	0.9766
JW0428	B0438	clpX	0.508	0.541	0.166	0.194	0.9523
JW0429	B0439	lon	0.556	0.583	0.211	0.216	0.8717
JW0483	B0494	tesA	0.539	0.548	0.255	0.249	0.7048
JW0545		rzpD	0.515	0.529	0.199	0.194	0.8681
JW0627	B0632	dacA	0.304	0.279	0.05	0.046	1.9846
JW0823	B0839	dacC	0.501	0.507	0.156	0.157	1.0524
JW0840	B0856	potH	0.539	0.55	0.163	0.159	1.1052
JW0866	B0882	clpA	0.512	0.539	0.157	0.167	1.0601
JW0915	B0932	pepN	0.534	0.555	0.162	0.163	1.095
JW0957	B0975	hyaD	0.547	0.596	0.21	0.195	0.9223
JW1113	B1127	pepT	0.558	0.568	0.144	0.143	1.2821
JW1171		hlyE	0.535	0.546	0.181	0.176	0.9895
JW1172	B1183	umuD	0.553	0.553	0.166	0.173	1.0662
JW1181	B1192	ldcA	0.53	0.548	0.138	0.143	1.2537
JW1264	B1272	sohB	0.575	0.581	0.206	0.201	0.9282
JW1332		abgA	0.208	0.217	0.125	0.124	0.5578
JW1357		rzpR	0.548	0.569	0.198	0.202	0.9126
JW1431	B1435	ydcP	0.583	0.615	0.239	0.239	0.819
JW1489	B1494	pqqL	0.588	0.595	0.233	0.192	0.8211
JW1755	B1766	sppA	0.546	0.54	0.197	0.156	0.9075
JW1818	B1829	htpX	0.517	0.51	0.069	0.072	2.1486
JW1819	B1830	prc	0.502	0.513	0.152	0.15	0.9914
JW1834	B1845	ptrB	0.561	0.57	0.177	0.157	0.9989
JW1992		dacD	0.56	0.556	0.215	0.162	0.8732
JW2005	B2023	hisH	0.591	0.596	0.181	0.145	1.0741
JW2066	B2081	yegQ	0.628	0.617	0.261	0.219	0.7651
JW2321		yfcK	0.627	0.629	0.145	0.151	1.2517
JW2325	B2328	mepA	0.547	0.55	0.163	0.148	1.0405
JW2382	B2385	ypdF	0.545	0.547	0.177	0.156	0.9673
JW2476	B2491	hyfR	0.473	0.477	0.168	0.134	0.9279
JW2507	B2523	pepB	0.532	0.527	0.155	0.13	1.0961
JW2669	B2699	recA	0.447	0.437	0.021	0.02	6.3602
JW2688	B2718	hycH	0.547	0.558	0.157	0.134	1.1201
JW2687	B2717	hycI	0.589	0.595	0.194	0.181	0.9314
JW2712	B2742	nlpD	0.606	0.594	0.099	0.103	1.7524
JW2723	B2753	iap	0.526	0.521	0.166	0.148	0.9836
JW2789	B2821	ptrA	0.487	0.491	0.155	0.141	0.9746
JW2840	B2872	ygeY	0.562	0.575	0.17	0.154	1.0352
JW2903	B2936	yggG	0.544	0.543	0.172	0.171	0.9348
JW2911	B2944	sprT	0.545	0.547	0.18	0.135	1.0226
JW2939	B2972	pppA	0.529	0.513	0.159	0.14	1.028
JW2961	B2993	hybD	0.6	0.589	0.169	0.153	1.0892
JW3100	B3131	agaR	0.568	0.562	0.167	0.146	1.065
JW3098	B3129	sohA	0.509	0.502	0.14	0.141	1.0613
JW3127	B3158	yhbU	0.518	0.535	0.186	0.167	0.8799
JW3149	B3182	dacB	0.546	0.547	0.173	0.15	0.9982
JW3203	B3234	degQ	0.542	0.541	0.174	0.142	1.011
JW3214		yhdP	0.536	0.553	0.173	0.164	0.9532
JW3930	B3958	argC	0.505	0.502	0.161	0.148	0.9613
JW3902	B3931	hslU	0.567	0.562	0.193	0.185	0.8811
JW3903	B3932	hslV	0.562	0.559	0.169	0.145	1.0531
JW3869	B3898	frvX	0.526	0.533	0.167	0.156	0.9671
JW3823	B3847	pepQ	0.527	0.524	0.162	0.154	0.9811
JW3824		yigZ	0.521	0.525	0.168	0.139	1.0051
JW3771		yifK	0.513	0.509	0.172	0.146	0.948
JW3670	B3693	dgoK	0.519	0.51	0.188	0.154	0.8875
JW3588		yibP	0.487	0.5	0.093	0.096	1.5405
JW3504	B3536	yhjS	0.575	0.575	0.18	0.199	0.8951
JW3495	B3527	yhjJ	0.579	0.59	0.177	0.16	1.0233
JW3465	B3498	prlC	0.543	0.536	0.155	0.159	1.0137
JW3434	B3469	zntA	0.516	0.507	0.169	0.137	0.9862
JW3412	B3447	ggt	0.539	0.544	0.169	0.152	0.9952
JW3359	B3396	mrcA	0.524	0.519	0.137	0.147	1.0833
JW3297	B3335	hofD	0.514	0.512	0.176	0.169	0.8773
JW3981	B4021	pepE	0.501	0.507	0.15	0.163	0.95
JW4131	B4173	hflX	0.549	0.546	0.156	0.175	0.9759
JW4132	B4174	hflK	0.525	0.524	0.106	0.111	1.426
JW4133	B4175	hflC	0.476	0.488	0.135	0.123	1.1022
JW4217	B4260	pepA	0.492	0.494	0.151	0.147	0.976
JW4267		sgcX	0.531	0.534	0.163	0.164	0.9607
JW4291	B4328	iadA	0.558	0.557	0.137	0.126	1.2506
JW4352	B4389	radA	0.514	0.515	0.159	0.142	1.0084
JW2150	B2163	nsr	0.553	0.551	0.179	0.187	0.8898
JW2152	B2165	yeiN	0.586	0.59	0.125	0.155	1.2389
JW2169	B2181	yejG	0.499	0.514	0.184	0.172	0.8394
JW2219	B2225	yfaP	0.525	0.554	0.178	0.178	0.8941
JW2220	B2226	yfaQ	0.511	0.509	0.144	0.143	1.0484
JW2221	B2227	(yfaS)	0.55	0.55	0.151	0.157	1.0535
JW2222	B2228	yfaS	0.521	0.517	0.143	0.14	1.082
JW2223	B2229	yfaT	0.528	0.53	0.151	0.141	1.0688
JW2224	B2230	yfaA	0.53	0.533	0.15	0.179	0.9531
JW2232	B2238	yfaH	0.572	0.575	0.165	0.187	0.9612
JW2238	B2244	yfaD	0.574	0.593	0.165	0.175	1.0125
JW2238.5		JW2238.5	0.512	0.518	0.148	0.143	1.0441
JW2239	B2245	yfaU	0.516	0.533	0.143	0.153	1.0454
JW2244		yfaZ	0.533	0.535	0.168	0.143	1.013
JW2250	B2256	yfbH	0.532	0.564	0.142	0.148	1.1148
JW2252	B2257.1	yfbW	0.52	0.52	0.153	0.145	1.0295
JW2253		yfbJ	0.542	0.539	0.187	0.175	0.8809
JW2267	B2272	yfbM	0.574	0.578	0.09	0.116	1.6496
JW2270	B2275	yfbP	0.564	0.568	0.16	0.178	0.9879
JW2288	B2291	yfbR	0.523	0.54	0.166	0.174	0.9223
JW2296	B2299	yfcD	0.435	0.439	0.071	0.084	1.6633
JW2302	B2305	yfcI	0.537	0.536	0.108	0.114	1.4258
JW2322	B2325	yfcL	0.471	0.482	0.145	0.158	0.9278
JW2330	B2333	yfcP	0.462	0.467	0.142	0.144	0.9582
JW2332	B2335	yfcR	0.524	0.552	0.183	0.176	0.8841
JW2350	B2354	yfdK	0.575	0.571	0.156	0.18	1.0061
JW2352	B2356	yfdM	0.56	0.567	0.133	0.143	1.2045
JW2355	B2358	yfdO	0.517	0.518	0.172	0.178	0.8723
JW2357	B2360	yfdQ	0.498	0.514	0.156	0.152	0.9692
JW2358	B2361	yfdR	0.475	0.492	0.102	0.112	1.3329
JW2360		JW5386	0.544	0.544	0.14	0.147	1.1183
JW2372	B2375	yfdX	0.511	0.522	0.16	0.15	0.983
JW2387	B2390	ypeC	0.514	0.515	0.17	0.16	0.9198
JW2393	B2398	yfeC	0.603	0.608	0.207	0.21	0.8567
JW2394	B2399	yfeD	0.567	0.572	0.184	0.196	0.8842
JW2412	B2419	yfeK	0.596	0.593	0.116	0.137	1.3863
JW2425	B2432	yfeY	0.563	0.564	0.109	0.117	1.471
JW2426	B2433	yfeZ	0.596	0.569	0.174	0.206	0.9044
JW2432	B2439	eutL	0.588	0.574	0.156	0.193	0.9822
JW2435	B2451	eutA	0.568	0.572	0.165	0.175	0.9891
JW2443	B2459	eutT	0.572	0.58	0.149	0.165	1.0822
JW2444	B2460	eutQ	0.616	0.604	0.208	0.205	0.8714
JW2445	B2461	eutP	0.567	0.562	0.107	0.101	1.5119
JW2446	B2462	eutS	0.594	0.59	0.161	0.172	0.9904
JW2450	B2466	ypfG	0.549	0.551	0.151	0.151	1.0146
JW2457		JW2457	0.481	0.478	0.072	0.064	1.9642
JW2458		ypfH	0.579	0.579	0.147	0.149	1.0897
JW2504	B2520	yfhM	0.56	0.558	0.167	0.171	0.9214
JW2520	B2536	hcaT	0.6	0.608	0.14	0.143	1.189
JW2539	B2555	yfhG	0.536	0.537	0.202	0.178	0.7865
JW2544		yfhB	0.589	0.581	0.183	0.171	0.9206
JW2567		yfiP	0.557	0.55	0.152	0.151	1.0177
JW2570	B2586	yfiM	0.534	0.543	0.132	0.139	1.107
JW2583		yfiL	0.561	0.567	0.136	0.155	1.0797
JW2584	B2603	yfiR	0.532	0.537	0.157	0.162	0.9335
JW2600	B2619	yfjG	0.526	0.523	0.158	0.151	0.9456
JW2603	B2623	yfjH	0.472	0.468	0.134	0.133	0.9807
JW2605	B2625	yfjI	0.544	0.545	0.17	0.164	0.9082
JW2608	B2627	yfjK	0.542	0.529	0.09	0.098	1.5869
JW2609	B2628	yfjL	0.547	0.556	0.149	0.155	1.0107
JW2610	B2629	yfjM	0.539	0.545	0.147	0.139	1.0558
JW2611	B2630	yfjN	0.525	0.527	0.139	0.152	1.007
JW2612		yfjO	0.523	0.537	0.112	0.104	1.367
JW2614	B2633	yfjQ	0.551	0.548	0.144	0.156	1.0204
JW2623	B2642	yfjW	0.473	0.479	0.082	0.078	1.6574
JW2623.5			0.595	0.589	0.169	0.16	1.0024
JW2624	B2643	yfjX	0.519	0.509	0.158	0.158	0.9062
JW2627	B2646	ypjF	0.516	0.521	0.15	0.159	0.9348
JW2631	B2656	JW2631	0.484	0.488	0.078	0.076	1.7581
JW2634		ygaT	0.513	0.531	0.112	0.12	1.2535
JW2645	B2670	ygaW	0.56	0.566	0.139	0.153	1.0741
JW2646	B2671	ygaC	0.475	0.475	0.097	0.089	1.4227
JW2647	B2672	ygaM	0.555	0.553	0.183	0.168	0.8793
JW2658	B2683	ygaH	0.546	0.55	0.16	0.146	0.9977
JW2702	B2732	ygbA	0.422	0.383	0.065	0.047	2.0021
JW2719	B2749	ygbE	0.516	0.518	0.149	0.15	0.9633
JW2724		ygbF	0.523	0.527	0.15	0.15	0.9749
JW2725	B2755	ygbT	0.532	0.53	0.139	0.136	1.0757
JW2726	B2756	ygcH	0.487	0.492	0.131	0.138	1.0138
JW2727			0.507	0.496	0.14	0.137	1.0086
JW1547	B1555	ydfR	0.549	0.553	0.148	0.139	1.0696
JW1552		ydfU	0.54	0.542	0.189	0.171	0.8372
JW1560	B1568	ydfX	0.498	0.495	0.095	0.078	1.5989
JW1563	B1571	ydfA	0.513	0.529	0.172	0.17	0.8487
JW1565	B1573	ydfC	0.512	0.52	0.145	0.156	0.955
JW1567	B1576	ydfD	0.48	0.484	0.11	0.111	1.215
JW1575	B1583	ynfB	0.511	0.521	0.134	0.153	1.0016
JW1577		ynfC	0.527	0.53	0.133	0.134	1.1027
JW1590	B1598	ydgD	0.569	0.573	0.206	0.196	0.7913
JW1596	B1604	ydgH	0.555	0.567	0.153	0.127	1.1162
JW1599	B1607	ydgC	0.573	0.57	0.129	0.124	1.2584
JW1617	B1625	ydgT	0.468	0.476	0.082	0.079	1.6332
JW1618	B1626	ydgK	0.53	0.532	0.15	0.153	0.9763
JW1631	B1639	ydhA	0.495	0.504	0.104	0.102	1.3508
JW1637	B1645	ydhK	0.511	0.513	0.137	0.138	1.0372
JW1640			0.524	0.516	0.12	0.111	1.2541
JW1657	B1667.1	ydhR	0.551	0.547	0.167	0.143	0.9866
JW1658	B1668	ydhS	0.53	0.535	0.085	0.068	1.9389
JW1659	B1669	ydhT	0.518	0.518	0.161	0.149	0.9309
JW1662	B1672	ydhW	0.447	0.465	0.151	0.155	0.8302
JW1675	B1685	ydiH	0.537	0.546	0.161	0.17	0.9114
JW1695	B1705	ydiE	0.529	0.532	0.141	0.136	1.0669
JW1697	B1707	ydiV	0.519	0.516	0.143	0.143	1.008
JW1711	B1722	ydiY	0.521	0.522	0.147	0.144	0.9984
JW1715	B1726	yniB	0.524	0.543	0.173	0.162	0.8872
JW1722	B1733	ydjC	0.574	0.58	0.166	0.154	1.0045
JW1743		ynjB	0.541	0.541	0.173	0.168	0.8838
JW1749	B1760	ynjH	0.481	0.496	0.169	0.168	0.8076
JW1751		ynjI	0.52	0.528	0.15	0.15	0.9731
JW1766	B1777	yeaC	0.49	0.498	0.164	0.154	0.8654
JW1776	B1787	yeaK	0.53	0.525	0.153	0.146	0.9828
JW1782	B1793	yoaF	0.539	0.538	0.156	0.155	0.9646
JW1785	B1796	yoaG	0.553	0.561	0.169	0.157	0.9519
JW1786	B1797	yeaR	0.557	0.56	0.187	0.166	0.8814
JW1800	B1811	yoaH	0.563	0.568	0.192	0.185	0.8357
JW1809	B1820	yobD	0.519	0.539	0.157	0.157	0.9386
JW1814	B1825	yebO	0.52	0.531	0.164	0.163	0.8953
JW1825		yebV	0.509	0.506	0.015	0.013	10.0975
JW1826		yebW	0.523	0.526	0.161	0.155	0.9247
JW1828	B1839	yebY	0.547	0.551	0.155	0.155	0.9866
JW1829	B1840	yebZ	0.545	0.55	0.191	0.17	0.8449
JW1832	B1843	yobB	0.627	0.629	0.191	0.192	0.9135
JW1835	B1846	yebE	0.56	0.561	0.162	0.154	0.9882
JW1837	B1848	yebG	0.528	0.531	0.189	0.168	0.8263
JW1851		yebB	0.497	0.501	0.093	0.096	1.4709
JW1857	B1868	yecE	0.525	0.52	0.133	0.136	1.0821
JW1858		yecN	0.495	0.502	0.149	0.142	0.9544
JW1864		yecM	0.542	0.564	0.134	0.133	1.1539
JW1891	B1903.1	yecJ	0.547	0.541	0.167	0.161	0.924
JW1892	B1904	yecR	0.594	0.611	0.207	0.204	0.8167
JW1894	B1906	yecH	0.563	0.568	0.179	0.162	0.9239
JW1900	B1915	yecF	0.575	0.573	0.141	0.134	1.1628
JW1913	B1928	yedD	0.568	0.573	0.173	0.16	0.9544
JW1914	B1929	yedE	0.572	0.569	0.166	0.164	0.9631
JW1937		yodD	0.527	0.523	0.11	0.104	1.3667
JW1940	B1957	yodC	0.573	0.578	0.151	0.138	1.1094
JW1946	B1963	yedR	0.512	0.506	0.149	0.126	1.0311
JW1988	B2006	yeeW	0.576	0.575	0.173	0.158	0.9686
JW1990	B2008	yeeA	0.558	0.562	0.222	0.232	0.7234
JW1995	B2013	yeeE	0.551	0.566	0.171	0.18	0.9332
JW2058	B2073	yegL	0.562	0.558	0.127	0.117	1.3461
JW2065		yegP	0.563	0.566	0.166	0.175	0.9709
JW2068			0.545	0.555	0.156	0.188	0.9377
JW2089		yegX	0.508	0.515	0.113	0.117	1.3043
JW2094		yohN	0.589	0.593	0.171	0.196	0.9445
JW2095	B2108	yehA	0.622	0.606	0.181	0.217	0.9048
JW2099	B2112	yehE	0.565	0.57	0.242	0.25	0.6765
JW2105	B2118	yehI	0.517	0.523	0.103	0.102	1.4877
JW2106	B2118.1	yehK	0.524	0.536	0.15	0.153	1.0259
JW2107		yehL	0.516	0.523	0.129	0.155	1.0729
JW2108	B2120	yehM	0.542	0.543	0.154	0.16	1.0133
JW2109		yehP	0.506	0.504	0.143	0.149	1.0143
JW2110	B2122	yehQ	0.544	0.547	0.14	0.147	1.1148
JW2111		yehR	0.59	0.592	0.127	0.14	1.2982
JW2112	B2124	yehS	0.543	0.54	0.187	0.195	0.8314
JW2123		yohC	0.546	0.548	0.169	0.168	0.952
JW2127		(yohG)	0.527	0.52	0.169	0.164	0.922
JW0935		ymbA	0.477	0.472	0.137	0.129	1.0462
JW0949	B0966	yccV	0.493	0.508	0.139	0.149	1.0193
JW0968	B0985	ymcB	0.539	0.541	0.131	0.15	1.1271
JW0976	B0991.1	gnsA	0.55	0.549	0.146	0.147	1.1
JW0984	B0999	yccD	0.578	0.584	0.163	0.169	1.0264
JW0986	B1001	yccE	0.494	0.493	0.204	0.216	0.6891
JW0988	B1003	yccJ	0.527	0.53	0.146	0.153	1.0367
JW0990		ymdF	0.529	0.544	0.125	0.139	1.1919
JW1000		yzpU	0.552	0.535	0.145	0.152	1.0733
JW1006	B1021	ycdP	0.542	0.542	0.127	0.143	1.1774
JW1008		ycdR	0.519	0.522	0.134	0.131	1.152
JW1019		ycdZ	0.535	0.522	0.168	0.141	1.0031
JW1034	B1047	mdoC	0.583	0.589	0.173	0.174	0.9905
JW1036			0.55	0.55	0.197	0.199	0.8146
JW1047		yceP	0.508	0.508	0.168	0.161	0.9056
JW1050	B1063	yceB	0.541	0.539	0.152	0.164	1.0023
JW1054	B1067	yceH	0.511	0.511	0.16	0.162	0.9308
JW1090	B1104	ycfL	0.51	0.509	0.148	0.145	1.0199
JW1091		ycfM	0.521	0.527	0.13	0.15	1.0976
JW1094		ycfP	0.536	0.537	0.13	0.134	1.1919
JW1098	B1112	ycfR	0.537	0.536	0.16	0.159	0.9864
JW1101	B1115	ycfT	0.528	0.528	0.144	0.153	1.0427
JW1108		ymfA	0.531	0.533	0.168	0.176	0.907
JW1133	B1147	ymfL	0.529	0.534	0.158	0.138	1.0531
JW1134	B1148	ymfM	0.5	0.498	0.154	0.153	0.9533
JW1136	B1150	ymfR	0.497	0.51	0.145	0.132	1.0661
JW1137	B1151	ymfO	0.518	0.518	0.131	0.165	1.0264
JW1139	B1153	ymfQ	0.541	0.544	0.14	0.136	1.1528
JW1154	B1167	ymgC	0.557	0.559	0.172	0.171	0.9541
JW1159		ymgD	0.536	0.544	0.199	0.207	0.7801
JW1167	B1178	ycgK	0.532	0.532	0.183	0.173	0.8765
JW1183	B1194	ycgR	0.496	0.498	0.146	0.15	0.9848
JW1196	B1205	ychH	0.493	0.503	0.153	0.154	0.9514
JW1204	B1213	sirB2	0.511	0.512	0.15	0.166	0.9494
JW1227.5			0.538	0.538	0.151	0.159	1.0179
JW1247	B1255	yciC	0.481	0.484	0.139	0.137	1.0253
JW1249	B1257	yciE	0.586	0.586	0.165	0.198	0.9468
JW1250	B1258	yciF	0.539	0.544	0.19	0.189	0.838
JW1251	B1259	yciG	0.528	0.537	0.15	0.156	1.0206
JW1260		yciQ	0.504	0.507	0.156	0.152	0.9626
JW1265	B1273	yciN	0.498	0.498	0.148	0.152	0.9736
JW1277			0.526	0.522	0.122	0.129	1.2244
JW1288	B1295	ymjA	0.517	0.522	0.148	0.152	1.0156
JW1319	B1326	mpaA	0.516	0.53	0.138	0.147	1.0763
JW1319.5		JW1319.5	0.494	0.503	0.159	0.139	0.9811
JW1320		ycjY	0.509	0.508	0.11	0.122	1.2855
JW1326	B1332	ynaJ	0.499	0.5	0.152	0.159	0.942
JW1330		abgT	0.488	0.501	0.146	0.159	0.9509
JW1334	B1340	ydaL	0.483	0.489	0.141	0.145	0.9967
JW1341	B1347	ydaC	0.487	0.5	0.104	0.11	1.3525
JW1346	B1351.1	ydaE	0.498	0.497	0.15	0.164	0.9293
JW1349	B1353.1.1	ydaF	0.53	0.536	0.118	0.126	1.2812
JW1353	B1358	ydaT	0.506	0.522	0.161	0.153	0.9601
JW1354	B1359	ydaU	0.531	0.533	0.145	0.155	1.0401
JW1356		ydaW	0.525	0.526	0.153	0.165	0.9692
JW1359	B1365	ynaK	0.486	0.493	0.143	0.153	0.9699
JW1360	B1366	ydaY	0.509	0.517	0.161	0.164	0.9258
JW1367	B1373	tfaR	0.503	0.513	0.14	0.183	0.9224
JW1373		ydbJ	0.522	0.527	0.145	0.157	1.0186
JW1376	B1381	ydbH	0.557	0.557	0.139	0.137	1.1836
JW1377	B1382	ynbE	0.554	0.562	0.129	0.163	1.1208
JW1408	B1411	ynbD	0.579	0.585	0.198	0.216	0.8245
JW1411	B1414	ydcF	0.546	0.548	0.152	0.154	1.0484
JW1416	B1419	ydcA	0.512	0.518	0.169	0.185	0.8533
JW1416.5			0.541	0.548	0.175	0.183	0.8921
JW1421			0.545	0.548	0.134	0.15	1.1286
JW1422		ydcH	0.493	0.5	0.103	0.113	1.3482
JW1424	B1428	ydcK	0.514	0.512	0.132	0.133	1.1354
JW1427	B1431	ydcL	0.583	0.586	0.159	0.172	1.0357
JW1429		ydcO	0.604	0.611	0.201	0.233	0.821
JW1432	B1436	yncJ	0.577	0.576	0.159	0.163	1.0501
JW1433	B1438	ydcQ	0.569	0.57	0.184	0.192	0.8883
JW1441	B1446	ydcY	0.551	0.549	0.156	0.154	1.0406
JW1442	B1447	ydcZ	0.567	0.563	0.166	0.16	1.0165
JW1447	B1452	yncE	0.569	0.569	0.195	0.186	0.8759
JW1452	B1457	ydcD	0.581	0.584	0.137	0.141	1.2289
JW1453	B1458	(yhhI)	0.616	0.619	0.178	0.19	0.9842
JW1456	B1461	ydcE	0.532	0.537	0.221	0.171	0.8685
JW1468	B1472	JW1468	0.571	0.564	0.134	0.14	1.3192
JW1469	B1473	yddG	0.568	0.571	0.224	0.179	0.9001
JW1476		bdm	0.557	0.554	0.15	0.134	1.2459
JW1516	B1523	yneG	0.498	0.503	0.184	0.162	0.9214
JW1520	B1527	yneK	0.573	0.577	0.202	0.159	1.0145
JW1534	B1541	ydfZ	0.555	0.561	0.203	0.171	0.9503
JW1539	B1546	tfaQ	0.564	0.572	0.176	0.166	1.0578
JW1543		gnsB	0.53	0.534	0.179	0.157	1.0085
JW1545	B1553	ydfP	0.462	0.5	0.169	0.182	0.8728
JW0239	B0250	ykfB	0.468	0.478	0.163	0.151	0.9595
JW0242	B0252	yafZ	0.549	0.551	0.214	0.178	0.8937
JW0259	B0266	yagB	0.574	0.587	0.212	0.18	0.9432
JW0270	B0276	yagJ	0.545	0.554	0.165	0.169	1.0479
JW0271	B0277	yagK	0.55	0.562	0.18	0.162	1.0355
JW0281	B0287	yagU	0.528	0.532	0.19	0.182	0.9075
JW0282	B0288	ykgJ	0.542	0.547	0.154	0.147	1.1522
JW0283		yagV	0.56	0.566	0.169	0.157	1.1
JW0284	B0290	yagW	0.511	0.516	0.191	0.165	0.9187
JW0286	B0292	yagY	0.497	0.498	0.16	0.159	0.9934
JW0287	B0293	yagZ	0.507	0.508	0.051	0.044	3.4026
JW0311	B0319	yahE	0.539	0.555	0.166	0.155	1.0854
JW0313	B0321	yahG	0.516	0.531	0.196	0.175	0.8988
JW0321	B0329	yahO	0.579	0.577	0.172	0.174	1.064
JW0349	B0358	yaiO	0.532	0.541	0.168	0.156	1.0547
JW0355	B0363	yaiP	0.516	0.523	0.177	0.161	0.979
JW0356	B0364	yaiS	0.563	0.56	0.188	0.159	1.0307
JW0366	B0375	yaiV	0.468	0.478	0.175	0.148	0.9327
JW0369	B0378	yaiW	0.478	0.48	0.171	0.141	0.9779
JW0370	B0379	yaiY	0.472	0.482	0.173	0.156	0.9235
JW0371		yaiZ	0.513	0.53	0.109	0.098	1.6047
JW0380	B0389	yaiA	0.513	0.524	0.158	0.153	1.0619
JW0382	B0391	yaiE	0.556	0.564	0.151	0.139	1.23
JW0394	B0404	yajB	0.499	0.506	0.131	0.114	1.3064
JW0400	B0410	yajD	0.502	0.514	0.142	0.13	1.1896
JW0447		ylaC	0.473	0.479	0.156	0.144	1.0106
JW0455	B0466	ybaM	0.552	0.556	0.17	0.16	1.0693
JW0457	B0468	ybaN	0.546	0.551	0.183	0.168	0.9953
JW0471	B0482	ybaP	0.513	0.523	0.172	0.157	1.0028
JW0489	B0500	ybbD	0.561	0.567	0.14	0.139	1.2876
JW0490		JW5069	0.532	0.548	0.217	0.199	0.8268
JW0503	B0515	ylbA	0.52	0.524	0.205	0.158	0.9159
JW0508	B0519	ylbE	0.507	0.511	0.204	0.191	0.8208
JW0509	B0520	ylbF	0.494	0.501	0.164	0.149	1.0124
JW0516	B0527	ybcI	0.514	0.519	0.167	0.139	1.0751
JW0535	B0547	ybcN	0.513	0.519	0.166	0.152	1.0335
JW0537	B0549	ybcO	0.477	0.486	0.141	0.12	1.175
JW0539	B0551	ybcQ	0.529	0.533	0.197	0.195	0.8628
JW0550		tfaD	0.553	0.552	0.197	0.174	0.9485
JW0556	B0567	ybcH	0.539	0.544	0.164	0.145	1.1162
JW0562	B0573	cusF	0.515	0.518	0.142	0.126	1.2275
JW0568		ybdF	0.535	0.534	0.174	0.161	1.0163
JW0569	B0580	ybdJ	0.513	0.518	0.167	0.155	1.0197
JW0591	B0598.1	ybdD	0.477	0.486	0.164	0.131	1.0396
JW0594	B0601	ybdM	0.537	0.552	0.193	0.161	0.9797
JW0595	B0602	ybdN	0.505	0.513	0.181	0.163	0.9425
JW0638	B0643	ybeL	0.496	0.501	0.182	0.161	0.9257
JW0640	B0645	ybeR	0.48	0.478	0.174	0.155	0.9273
JW0641	B0646	ybeS	0.5	0.506	0.155	0.162	1.0107
JW0643	B0648	ybeU	0.528	0.533	0.182	0.173	0.9518
JW0667	B0681	ybfM	0.493	0.511	0.188	0.176	0.8784
JW0670	B0683.1	ybfJ	0.507	0.52	0.159	0.147	1.0689
JW0672		ybfE	0.505	0.505	0.171	0.151	0.9989
JW0681	B0693.1	ybfK	0.523	0.517	0.144	0.151	1.1227
JW0691	B0702	ybfB	0.529	0.528	0.216	0.213	0.7847
JW0693	B0704	ybfC	0.513	0.52	0.182	0.167	0.9426
JW0694		JW0694	0.495	0.496	0.18	0.172	0.8966
JW0706		ybgO	0.519	0.526	0.161	0.142	1.0984
JW0725	B0735	ybgE	0.478	0.485	0.164	0.146	0.9893
JW0736	B0753	ybgS	0.485	0.497	0.125	0.123	1.261
JW0745		ybhT	0.524	0.53	0.16	0.147	1.0934
JW0773	B0790	ybhP	0.545	0.551	0.214	0.197	0.8493
JW0783	B0798	ybiA	0.556	0.563	0.259	0.264	0.6814
JW0787	B0802	ybiJ	0.541	0.543	0.172	0.178	0.9864
JW0788	B0803	ybiI	0.522	0.523	0.172	0.186	0.9296
JW0792		ybiN	0.529	0.535	0.182	0.169	0.9654
JW0805	B0821	ybiU	0.584	0.585	0.159	0.191	1.0637
JW0827	B0843	ybjH	0.516	0.52	0.17	0.178	0.9481
JW0834	B0850	ybjC	0.513	0.519	0.16	0.154	1.0467
JW0837	B0853	ybjN	0.586	0.595	0.218	0.194	0.9129
JW0842	B0858	ybjO	0.563	0.565	0.259	0.234	0.7287
JW0860	B0876	ybjD	0.536	0.537	0.195	0.194	0.8785
JW0902	B0919	ycbJ	0.522	0.533	0.189	0.181	0.9081
JW0924	B0941	ycbT	0.523	0.53	0.141	0.132	1.2284
JW0925	B0942	ycbU	0.527	0.542	0.152	0.167	1.0672
JW0926		ycbV	0.528	0.537	0.158	0.186	0.986
JW0929		ycbW	0.54	0.548	0.151	0.129	1.2375
JW1004	B1019	ycdB	0.59	0.589	0.197	0.197	0.953
JW1018	B1035	ycdY	0.602	0.602	0.224	0.204	0.8959
JW1038		yceK	0.527	0.534	0.159	0.146	1.1079
JW1043	B1056	yceI	0.538	0.542	0.234	0.206	0.7817
JW1044	B1057	yceJ	0.571	0.581	0.207	0.2	0.9014
JW1074	B1088	yceD	0.489	0.494	0.096	0.098	1.6137
JW1114	B1128	ycfD	0.498	0.507	0.065	0.07	2.3708
JW1138		ymfP	0.596	0.604	0.172	0.159	1.1546
JW1140	B1154	ycfK	0.498	0.503	0.102	0.071	1.8427
JW1170		ycgN	0.9477	0.9986	0.2327	0.2794	1.2585
JW1177	B1188	ycgB	0.9115	0.8942	0.2837	0.3002	1.024
JW1190		ycgS	0.8609	0.8214	0.2787	0.2458	1.0621
JW1191		ycgT	0.8398	0.8085	0.3496	0.348	0.7824
JW1205	B1214	sirB1	0.9512	0.9449	0.2916	0.3352	1.0017
JW1240	B1248	yciU	0.882	0.9268	0.2678	0.2875	1.0786
JW1243	B1251	yciI	0.8859	0.8997	0.2652	0.2756	1.0933
JW1271	B1279	yciS	0.7746	0.7642	0.2982	0.2724	0.893
JW1314	B1321	ycjX	0.8946	0.8607	0.2389	0.2315	1.2356
JW1315	B1322	ycjF	0.8906	0.8681	0.2635	0.2438	1.1479
JW1419	B1423	ydcJ	0.8323	0.8594	0.2906	0.2854	0.9725
JW1427.5		JW1427.5	0.8208	0.8042	0.2314	0.2134	1.2097
JW1473		yddM	0.9294	0.9712	0.2843	0.2487	1.1807
JW1513		yneE	0.7753	0.7619	0.193	0.1864	1.3416
JW1529	B1536	ydeI	0.9343	0.905	0.3505	0.3649	0.8513
JW1606	B1614	ydgA	0.8685	0.9198	0.2636	0.2893	1.071
JW1623	B1631	rnfG	0.8865	0.9268	0.3019	0.2302	1.1284
JW1714	B1725	yniA	0.9342	0.9566	0.2701	0.2086	1.3079
JW1781	B1792	yeaO	0.9201	0.9273	0.3336	0.3291	0.9231
JW1938	B1955	yedP	0.8173	0.8442	0.3576	0.3546	0.7725
JW1941	B1958	yedI	0.8974	0.9126	0.3159	0.3182	0.9452
JW1958	B1976	yeeI	0.9735	0.9823	0.3623	0.3433	0.9178
JW1989	B2007	yeeX	0.903	0.8992	0.3222	0.3365	0.906
JW2139	B2152	yeiB	0.9332	0.9001	0.2192	0.2548	1.2807
JW2174	B2186	yejK	1.0087	0.9436	0.2659	0.2424	1.2718
JW2175	B2187	yejL	0.9166	0.9254	0.3644	0.2756	0.953
JW2265	B2270	yfbK	0.9266	0.9457	0.342	0.3495	0.8966
JW2292	B2295	yfbV	0.9045	0.8894	0.3367	0.3084	0.9208
JW2298	B2301	yfcF	0.9499	0.9457	0.3526	0.3393	0.9072
JW2323		yfcM	0.9245	0.9521	0.2522	0.2726	1.1841
JW2328	B2331	yfcN	0.9263	0.899	0.3471	0.3469	0.8709
JW2340	B2343	yfcZ	0.8646	0.8898	0.3451	0.3144	0.8809
JW2346	B2350	yfdG	0.9386	0.961	0.2522	0.2017	1.3858
JW2351		yfdL	0.8953	0.868	0.3173	0.3281	0.9047
JW2401		yfeH	0.9344	0.945	0.3385	0.3106	0.9587
JW2424	B2431	yfeX	0.901	0.8936	0.3669	0.3525	0.826
JW2508	B2524	yfhJ	0.8592	0.8838	0.2822	0.2802	1.0262
JW2599	B2618	yfjF	0.7491	0.7405	0.2895	0.2832	0.8613
JW2664	B2689	yqaA	0.9249	0.8559	0.2814	0.2513	1.1069
JW2707	B2737	ygbK	0.9178	0.8942	0.336	0.2842	0.9674
JW2738	B2768	ygcP	0.9508	0.8909	0.2951	0.2844	1.0523
JW2749		ygcG	0.9062	0.9313	0.247	0.2847	1.1443
JW2763	B2792	yqcC	0.9003	0.9042	0.32	0.3226	0.9298
JW2777	B2806	ygdE	0.8397	0.8396	0.2419	0.232	1.1734
JW0004	B0005	yaaX	0.9112	0.9401	0.2628	0.2329	1.2367
JW0012	B0013	yaaI	0.9226	0.918	0.3727	0.3469	0.847
JW0032	B0033.1	yaaV	0.942	0.9474	0.3179	0.2615	1.0798
JW0099	B0102	yacF	0.9742	0.9333	0.3981	0.3692	0.8232
JW0113	B0117	yacH	0.9514	0.9537	0.2916	0.3068	1.0542
JW0118	B0122	yacC	0.9141	0.8994	0.3112	0.3126	0.9626
JW0128		yadD	0.8385	0.8481	0.2818	0.3146	0.9364
JW0132	B0136	yadK	0.9195	0.92	0.2952	0.2936	1.0345
JW0133	B0137	yadL	0.9252	0.9061	0.3448	0.3346	0.8925
JW0159	B0163	yaeH	0.9083	0.9099	0.3273	0.3124	0.9411
JW0185	B0189.1	yaeP	0.9277	0.9166	0.2805	0.2697	1.11
JW0186	B0190	yaeQ	0.9375	0.9533	0.2697	0.2742	1.1511
JW0199		yafD	0.9287	0.9558	0.3204	0.3176	0.9781
JW0203	B0213	yafS	0.8666	0.9055	0.3565	0.3458	0.8355
JW0206	B0217	yafT	0.8874	0.8915	0.3514	0.3574	0.831
JW0214	B0224	yafK	0.8896	0.8918	0.3755	0.363	0.7987
JW0223	B0233	yafO	0.8897	0.8743	0.2705	0.2803	1.0605
JW0225	B0235	ykfJ	0.9179	0.9158	0.258	0.2384	1.2232
JW0229	B0239	yafA	0.9397	0.9345	0.3645	0.3254	0.8995
JW0234	B0245	ykfI	0.9433	0.9645	0.4099	0.3587	0.8219
JW0235	B0246	yafW	0.9179	0.9187	0.24	0.2159	1.3339
JW0235.5	B0246.1	ykfH	0.9428	0.9592	0.3388	0.3124	0.9671
JW0237		yafX	0.8973	0.8874	0.3143	0.3138	0.9409
JW0238		ykfF	0.8695	0.8722	0.3462	0.288	0.9094
JW1663		ydhV	0.9641	0.9851	0.3141	0.3251	1.0097
JW1669	B1679	sufE	0.8319	0.8212	0.1881	0.2053	1.3914
JW1717		ydjM	0.9306	0.9134	0.3917	0.3651	0.8068
JW1984	B2002	yeeS	0.7649	0.7588	0.1603	0.1242	1.7734
JW2242	B2248	yfaX	0.8595	0.8878	0.2564	0.269	1.1012
JW2423		yfeW	0.9466	0.9691	0.3418	0.3342	0.9384
JW2455	B2471	yffB	0.7918	0.8074	0.237	0.2332	1.1262
JW2459	B2474	ypfI	0.9277	0.9166	0.3619	0.3427	0.8667
JW2527	B2543	yphA	0.926	0.9551	0.247	0.2424	1.2727
JW2625	B2644	yfjY	0.9475	0.9428	0.3812	0.3631	0.841
JW2662	B2687	luxS	0.935	0.978	0.3249	0.2817	1.0443
JW2782	B2811	ygdK	0.9695	1.0198	0.3296	0.3382	0.9864
JW0158		cdaR	0.9245	0.9411	0.2719	0.2507	1.1821
JW0211		fadE	0.9358	0.9389	0.2557	0.3017	1.1137
JW0348	B0357	yaiN	0.9022	0.895	0.3876	0.3766	0.7787
JW0378	B0387	yaiI	0.8206	0.7912	0.3138	0.3281	0.8315
JW0416		yajQ	0.9056	0.9059	0.3452	0.332	0.8858
JW0631	B0636	ybeA	0.853	0.8079	0.3798	0.3692	0.7343
JW0639		ybeQ	0.945	0.9184	0.3922	0.3706	0.8089
JW0642	B0647	ybeT	0.9145	0.8964	0.1894	0.2057	1.5177
JW0703	B0713	ybgL	0.8959	0.9036	0.2499	0.2806	1.1232
JW0903	B0920	ycbC	0.9427	0.9348	0.2816	0.3095	1.0517
JW0943		yccS	0.9072	0.8925	0.3347	0.3354	0.8893
JW1428		ydcM	0.9114	0.873	0.3025	0.3177	0.9527
JW1574	B1582	ynfA	0.8258	0.8025	0.1148	0.1421	2.0988
JW1685		ydiO	0.9026	0.8765	0.1919	0.1915	1.5365
JW1778	B1789	yeaL	0.9726	0.9536	0.359	0.337	0.9164
JW1916	B1931	yedK	0.9724	0.9464	0.3103	0.2987	1.0433
JW1945	B1962	yedJ	0.9786	0.935	0.3187	0.2985	1.0879
JW2086	B2099	yegU	0.9308	0.9379	0.3622	0.3527	0.9172
JW2092	B2105	yohL	0.972	0.9372	0.3013	0.29	1.1329
JW2129	B2141	yohJ	0.966	0.9625	0.4198	0.4018	0.8236
JW2130	B2142	yohK	0.9718	0.958	0.4185	0.3539	0.8766
JW2148	B2161	yeiJ	0.9535	0.9413	0.4482	0.41	0.7747
JW2151	B2164	yeiM	0.9835	0.9318	0.4281	0.3905	0.821
JW2496	B2512	yfgL	0.0094	0.0088	0.0178	0.0129	0.208
JW2563	B2579	yfiD	0.9523	0.9559	0.2902	0.2149	1.3256
JW0009	B0010	yaaH	0.9291	0.9114	0.3795	0.3581	0.8755
JW0153	B0157	yadS	0.8959	0.9261	0.3133	0.2915	1.057
JW0215	B0225	yafQ	0.8655	0.8705	0.3856	0.3138	0.8709
JW0277	B0283	yagQ	0.8459	0.8629	0.2642	0.2495	1.1672
JW0295		ykgB	0.9083	0.9538	0.3989	0.411	0.8067
JW0501	B0513	ybbY	0.8832	0.9145	0.4092	0.3923	0.787
JW0504	B0516	allC	0.7789	0.85	0.3133	0.2859	0.9538
JW0570	B0581	ybdK	0.915	0.9368	0.3064	0.294	1.0822
JW0699	B0709	ybgH	0.9496	0.9387	0.3273	0.2734	1.103
JW0858	B0874	ybjE	0.935	0.9249	0.3513	0.3617	0.9153
JW0865	B0881	yljA	0.8615	0.8278	0.3819	0.3574	0.8018
JW0991		ycdG	0.7917	0.767	0.3147	0.2886	0.9065
JW1483	B1488	ddpX	0.829	0.8357	0.3162	0.3087	0.9347
JW1619	B1627	rnfA	0.9925	0.9788	0.3352	0.3563	1.0003
JW1626	B1634	ydgR	0.9133	0.9214	0.3273	0.3292	0.9806
JW1632	B1640	ydhH	0.9392	0.9561	0.3145	0.317	1.0531
JW1696	B1706	ydiU	0.9298	0.9267	0.3404	0.3643	0.9244
JW1821	B1832	yebR	0.9326	0.9505	0.3684	0.3091	0.9753
JW2145	B2158	yeiH	0.8887	0.881	0.2777	0.2789	1.1156
JW2371	B2374	yfdW	0.8715	0.8796	0.3436	0.3374	0.9022
JW2641	B2666	yqaE	0.9565	0.9356	0.3825	0.3728	0.879
JW2778	B2807	ygdD	0.7834	0.7822	0.2839	0.296	0.9473
JW0098		yacG	0.8888	0.8097	0.2793	0.2718	1.0814
JW0115	B0119	yacL	0.9772	0.9814	0.2542	0.2329	1.4109
JW0126	B0130	yadE	0.8855	0.9077	0.3622	0.3552	0.877
JW0218	B0228	yafM	0.8455	0.8414	0.2982	0.2791	1.0253
JW0224	B0234	yafP	0.8796	0.9069	0.333	0.333	0.9412
JW0248		ykfC	0.8008	0.7982	0.2446	0.2511	1.1318
JW0384	B0393	rdgC	0.9041	0.9813	0.3735	0.3926	0.8635
JW0472	B0483	ybaQ	0.9105	0.8693	0.3313	0.3652	0.8966
JW0491	B0503	ybbB	0.9034	0.8102	0.2854	0.2982	1.0303
JW0493	B0505	allA	0.8341	0.8646	0.2632	0.2619	1.1351
JW0539.5			0.8672	0.8539	0.2835	0.2775	1.0765
JW0577	B0585.1	ybdZ	0.8229	0.8183	0.31	0.3124	0.9252
JW0677		ybfG	0.8062	0.8126	0.3184	0.2951	0.9258
JW0678		(ybfG)	0.9308	0.9407	0.3539	0.3597	0.9202
JW0732	B0742	ybgF	0.9976	0.981	0.3336	0.3325	1.0423
JW0750	B0767	ybhE	0.8057	0.809	0.3462	0.3422	0.823
JW0752	B0769	ybhH	0.8225	0.6967	0.2741	0.2765	0.9681
JW0821	B0837	yliI	0.8556	0.8591	0.2581	0.2633	1.1539
JW0831	B0847	ybjL	0.926	0.9459	0.3666	0.3719	0.8894
JW0851	B0867	ybjR	0.861	0.8776	0.294	0.2852	1.0532
JW0861	B0877	ybjX	0.8539	0.8521	0.2922	0.2723	1.0604
JW0889	B0906	ycaP	0.808	0.7858	0.2571	0.2673	1.0664
JW0900	B0917	ycaR	0.8199	0.8424	0.3274	0.3286	0.8891
JW0908	B0925	ycbB	0.7597	0.7714	0.265	0.2562	1.0308
JW0909	B0926	ycbK	0.941	0.8691	0.2244	0.2443	1.3551
JW0942	B0959	yccR	0.9019	0.9129	0.2495	0.2537	1.2654
JW0944	B0961	yccF	0.9362	0.9268	0.244	0.2171	1.4177
JW0947	B0964	yccT	0.6512	0.6195	0.3014	0.406	0.6303
JW1003	B1018	ycdO	0.9635	0.967	0.3058	0.3145	1.092
JW1853	B1864	yebC	0.9074	0.9219	0.366	0.3642	0.879
JW1942	B1959	yedA	0.9323	0.9375	0.3697	0.3856	0.8686
JW1964	B1983	yeeN	0.8163	0.8154	0.3459	0.3519	0.8205
JW2230	B2236	yfaE	0.7601	0.7587	0.1381	0.1349	1.9521
JW0080	B0082	mraW	1.0613	1.0458	0.205	0.2104	1.7798
JW0656	B0659	ybeY	0.0145	0.0118	0.0248	0.0173	0.2192
JW0754		ybhJ	0.8023	0.7894	0.2122	0.2199	1.2925
JW0995	B1010	ycdK	0.8557	0.8481	0.2745	0.2719	1.0941
JW1146		JW5173	0.8765	0.8855	0.2936	0.2932	1.0536
JW1406	B1409	ynbB	0.9223	0.8903	0.3139	0.2819	1.0675
JW1530	B1537	ydeJ	0.7721	0.757	0.3585	0.3838	0.7228
JW1762	B1773	ydjI	0.8083	0.8096	0.2477	0.2252	1.2004
JW1798		yoaB	0.87	0.8451	0.2132	0.2108	1.4193
JW2670	B2700	ygaD	0.9395	0.9223	0.283	0.303	1.1148
JW2747		ygcE	0.9471	0.9291	0.2623	0.2461	1.2949
JW0064		yabI	0.9305	0.9103	0.3419	0.3433	0.9426
JW0896		ycaI	0.7725	0.793	0.3585	0.3809	0.7429
JW0993	B1008	ycdI	0.9496	0.9428	0.3634	0.3791	0.8943
JW1017	B1034	ycdX	0.7965	0.8331	0.2997	0.2877	0.9734
JW1258	B1266	trpH	0.8375	0.8134	0.174	0.1934	1.5767
JW1674	B1684	sufA	0.9323	0.9561	0.2914	0.3071	1.1071
JW1754	B1765	ydjA	0.7587	0.7308	0.2666	0.2629	0.987
JW1767	B1778	msrB	0.9254	0.9293	0.3312	0.3495	0.956
JW2512	B2528	yfhF	0.7928	0.8243	0.317	0.2332	1.0313
JW2708	B2738	ygbL	0.9201	0.9373	0.2837	0.2628	1.1925
JW0632		ybeB	0.8804	0.8628	0.2281	0.2324	1.3282
JW0756	B0773	ybhB	0.8809	0.8517	0.3456	0.3769	0.8414
JW1327	B1333	ydaA	0.9844	0.8582	0.2793	0.2823	1.1512
JW2324	B2327	yfcA	1.0018	0.966	0.2258	0.2212	1.5446
JW2808	B2840	ygeA	0.9143	0.9091	0.3125	0.3045	1.0369
JW0154	B0158	btuF	0.8803	0.8789	0.2417	0.2579	1.2355
JW0276	B0282	yagP	0.9211	0.8951	0.2313	0.23	1.3815
JW0763	B0780	ybhK	0.8329	0.7856	0.2615	0.2885	1.0325
JW1073		yceF	0.846	0.8445	0.2997	0.3249	0.9497
JW1308	B1315	ycjS	0.8389	0.8155	0.2807	0.3131	0.9776
JW1333	B1339	abgR	0.9894	0.9872	0.2225	0.258	1.4434
JW2521	B2537	hcaR	0.9772	0.9637	0.2237	0.2458	1.3554
JW2715	B2745	ygbO	0.9338	0.9371	0.3127	0.3512	0.9239
JW0182	B0187	yaeR	0.9888	0.9156	0.2945	0.2613	1.1234
JW0385	B0394	yajF	0.8531	0.8327	0.2055	0.1657	1.489
JW0770	B0787	ybhM	0.8297	0.8514	0.3874	0.4439	0.663
JW0830		ybjK	0.6656	0.5582	0.1344	0.1416	1.4538
JW1097		ycfQ	0.7706	0.8388	0.255	0.2319	1.0837
JW1105	B1119	ycfX	0.0161	0.0101	0.0143	0.0136	0.3079
JW1106	B1120	cobB	0.7976	0.7813	0.2389	0.2558	1.0464
JW1307		ycjR	0.8025	0.824	0.2486	0.254	1.061
JW1318	B1325	ycjG	0.8562	0.8486	0.3249	0.3715	0.8026
JW2241	B2247	yfaW	0.8823	0.8791	0.2144	0.2523	1.2374
JW2501	B2517	yfgB	0.6924	0.7078	0.2822	0.3234	0.7581
JW2575	B2593	yfiH	0.9117	0.9184	0.2941	0.3358	0.9526
JW2592	B2611	ypjD	0.9443	0.9165	0.1876	0.2023	1.5648
JW2709	B2739	ygbM	0.5267	0.409	0.0567	0.0721	2.3819
JW0079	B0081	mraZ	0.8764	0.8845	0.2189	0.2596	1.2066
JW0160		yaeI	0.9042	0.9176	0.309	0.3178	0.953
JW0433	B0443	ybaW	0.8223	0.819	0.2513	0.2887	0.9965
JW0726	B0736	ybgC	0.8485	0.8694	0.2735	0.3037	0.9758
JW1510	B1517	yneB	0.9233	0.9407	0.3105	0.36	0.9115
JW2084		fbaB	0.9126	0.9578	0.2674	0.3258	1.0338
JW2266	B2271	yfbL	0.9104	0.8872	0.2303	0.253	1.2195
JW0191	B0195	yaeB	0.9187	1.0144	0.2909	0.2938	1.084
JW0403	B0413	ybaD	0.9283	0.9601	0.2039	0.2458	1.3768
JW0850	B0866	ybjQ	0.8672	0.8787	0.3371	0.3786	0.7998
JW0997	B1012	ycdM	0.9327	0.9134	0.2276	0.2527	1.2602
JW1002	B1017	ycdN	0.9416	0.9535	0.2697	0.284	1.1222
JW1274	B1282	yciH	0.7778	0.7835	0.3219	0.3367	0.7773
JW1684	B1694	ydiF	0.7052	0.7503	0.1319	0.1546	1.6657
JW1787	B1798	yeaS	0.7888	0.8121	0.3416	0.363	0.7449
JW1890	B1902	ftnB	0.8253	0.8915	0.2561	0.2615	1.0875
JW2562	B2578	yfiK	0.7567	0.777	0.1492	0.1212	1.8597
JW2578	B2597	yfiA	0.9066	0.8765	0.3343	0.3205	0.8928
JW2657	B2682	ygaZ	0.8456	0.8725	0.3529	0.371	0.7782
JW0236	B0247	ykfG	0.913	0.9139	0.335	0.36	0.8618
JW0247	B0257	insM	0.9043	0.8961	0.3292	0.3488	0.8706
JW0260	B0267	yagA	0.9102	0.9497	0.2807	0.3189	1.017
JW0278	B0284	yagR	0.874	0.8571	0.3524	0.3708	0.7848
JW0279	B0285	yagS	0.9369	0.9702	0.2564	0.2729	1.1813
JW0589	B0597	ybdB	0.8563	0.8523	0.264	0.2819	1.0262
JW0721	B0732	ybgG	0.9459	0.9267	0.3618	0.3489	0.8639
JW0888	B0905	ycaO	0.9319	0.9317	0.2731	0.3533	0.9754
JW1032	B1045	ymdB	0.9055	0.8935	0.368	0.3824	0.786
JW1245	B1253	yciA	0.9572	0.9686	0.3199	0.3601	0.9285
JW1435	B1440	ydcS	0.886	0.9198	0.0894	0.0937	3.2336
JW1459	B1464	yddE	0.7566	0.7601	0.2326	0.2614	1.0066
JW1994	B2012	yeeD	0.7713	0.8303	0.2473	0.2658	1.0234
JW2012	B2031	(wbbL)	0.9497	0.9592	0.2509	0.2895	1.1582
JW2048		yegH	0.8692	0.8701	0.3383	0.3843	0.7892
JW2052	B2067	yegE	0.9419	0.9218	0.3263	0.3441	0.9115
JW2059		yegM	0.0121	0.0133	0.0137	0.0147	0.2932
JW2061	B2076	yegO	0.9724	0.972	0.3434	0.3707	0.8927
JW2062	B2077	yegB	1.0002	0.9995	0.3397	0.3713	0.9221
JW2070	B2086	yegS	0.7561	0.8072	0.3466	0.3517	0.734
JW2113		yehT	0.8889	1.0041	0.293	0.3071	1.0343
JW2114		yehU	0.9492	0.9237	0.2712	0.3095	1.0575
JW2119	B2131	yehZ	0.9371	0.9497	0.3472	0.3694	0.8633
JW2126		yohG	0.9314	0.9315	0.3466	0.3677	0.8551
JW2147	B2160	yeiI	0.9777	0.9798	0.264	0.2287	1.3026
JW2161	B2173	yeiR	0.8185	0.8091	0.3546	0.3496	0.7578
JW2165	B2177	yejA	0.9292	0.9496	0.3616	0.3777	0.8332
JW2172	B2184	yejH	0.9308	0.9189	0.361	0.3864	0.8114
JW2177			0.5609	0.5355	0.1393	0.1291	1.3393
JW2227	B2233	yfaL	0.9243	0.9429	0.2357	0.2835	1.1791
JW2245	B2251	yfaO	0.9438	0.9289	0.33	0.3642	0.8845
JW2247		yfbE	0.9379	0.9248	0.3518	0.3534	0.866
JW2248	B2254	yfbF	0.8888	0.8777	0.2551	0.2684	1.1064
JW2251	B2257	yfbI	0.9698	0.9635	0.243	0.2723	1.2301
JW2258	B2263	yfbB	0.9314	0.9206	0.3373	0.3495	0.8841
JW2289	B2292	yfbS	0.8615	0.8392	0.3306	0.3637	0.8031
JW2290		yfbT	0.8728	0.8464	0.1861	0.2002	1.4592
JW2295	B2298	yfcC	0.921	0.9033	0.1429	0.175	1.8815
JW2299	B2302	yfcG	0.8116	0.8386	0.2514	0.2713	1.0351
JW2301	B2304	yfcH	0.8979	0.9634	0.3424	0.362	0.8664
JW2319	B2322	yfcJ	0.8542	0.8899	0.3303	0.3597	0.8287
JW2347	B2351	yfdH	0.8977	0.9054	0.3392	0.359	0.8467
JW2377		ypdA	0.9388	0.9499	0.2853	0.2702	1.1148
JW2378	B2381.2	ypdB	0.9095	0.8961	0.3213	0.36	0.8689
JW2379	B2382	ypdC	0.9869	1.0104	0.2598	0.3046	1.1603
JW2386	B2389	yfeO	0.9814	0.8957	0.1616	0.2185	1.6192
JW2392		yfeA	0.8692	0.8434	0.3424	0.3482	0.8131
JW2420	B2427	yfeT	0.9375	0.92	0.2192	0.235	1.3409
JW2427	B2434	ypeA	0.8278	0.8403	0.314	0.3257	0.855
JW2451	B2467	yffH	0.8713	0.8102	0.2485	0.2698	1.0637
JW2488	B2503	yfgF	0.9214	0.932	0.2549	0.2825	1.1308
JW2489		yfgH	0.8984	0.9526	0.3716	0.3721	0.816
JW2500	B2516	yfgA	0.0129	0.0172	0.0115	0.0197	0.3163
JW2518	B2534	yfhR	0.8336	0.8682	0.2088	0.2341	1.2598
JW2532	B2548	yphF	0.8664	0.9053	0.2883	0.3011	0.9856
JW2533		yphG	0.869	0.8886	0.2802	0.2908	1.0092
JW2542	B2558	yfhD	0.8253	0.8575	0.1846	0.2014	1.4294
JW2545	B2561	yfhH	0.9934	0.9384	0.28	0.3095	1.0744
JW2559	B2575	yfiC	0.9641	0.9828	0.2541	0.2596	1.2426
JW2568	B2584	yfiQ	0.9518	0.9321	0.2773	0.2629	1.1434
JW2593		yfjD	0.9834	1.0031	0.2935	0.292	1.1124
JW2613		yfjP	0.8267	0.7784	0.3121	0.3005	0.8619
JW2635	B2660	ygaF	0.9048	0.8569	0.2875	0.3048	0.9784
JW2642	B2667	ygaV	0.8785	0.8873	0.2265	0.2151	1.3153
JW2643	B2668	ygaP	0.7165	0.75	0.2819	0.2746	0.8668
JW2655	B2680	(ygaY)	0.9169	0.9122	0.3112	0.3013	0.9823
JW2656		ygaY	0.903	0.8829	0.3308	0.285	0.954
JW2665	B2690	yqaB	0.9131	0.9317	0.3571	0.3247	0.8901
JW2681	B2711	flrR	0.9786	0.9713	0.3447	0.3241	0.9591
JW2731	B2761	ygcB	0.905	0.8841	0.2917	0.3145	0.9708
JW2742		ygcU	0.8356	0.8751	0.2758	0.3186	0.9467
JW2743			0.8926	0.9168	0.3022	0.3027	0.984
JW2745		ygcW	0.8881	0.9122	0.3504	0.3408	0.8568
JW2746	B2775	yqcE	0.8831	0.9029	0.3456	0.3424	0.8539
JW2748	B2777	ygcF	0.8972	0.927	0.3014	0.2777	1.0362
JW2765	B2794	yqcD	0.8333	0.8105	0.2691	0.2501	1.0415
JW2798	B2830	nudH	0.7096	0.6919	0.1472	0.163	1.4862
JW2800	B2832	ygdQ	0.9365	0.9564	0.3151	0.3581	0.9249
JW2803	B2835	ygeD	0.9141	0.9221	0.2817	0.3186	1.0062
JW0910	B0927	ycbL	0.8191	0.852	0.2793	0.2713	0.9984
JW0992		ycdH	0.842	0.8735	0.3224	0.3184	0.8806
JW1169	B1180	ycgM	0.8587	0.8723	0.2962	0.2978	0.9586
JW1457	B1462	yddH	0.9105	0.9111	0.2658	0.2435	1.1765
JW2680	B2710	flrD	0.9449	0.9403	0.3358	0.3182	0.9482
JW0497	B0509	glxR	0.9415	0.9404	0.298	0.2902	1.0524
JW1682	B1692	ydiB	0.8445	0.8424	0.2123	0.1726	1.4417
JW2128	B2140	yohI	0.8822	0.9218	0.2854	0.3204	0.9796
JW2706	B2736	ygbJ	0.8927	0.9133	0.2927	0.3422	0.9357
JW2297		yfcE	0.9353	0.9494	0.2918	0.2569	1.1299
JW0477		ybbJ	0.7882	0.8078	0.3396	0.3357	0.7774
JW0798	B0813	ybiF	0.8644	0.8747	0.2522	0.2188	1.2146
JW0930		ycbX	0.8176	0.8058	0.2952	0.3396	0.8412
JW1121	B1135	ymfC	0.8062	0.8166	0.2311	0.216	1.194
JW1261	B1269	yciL	0.8425	0.8217	0.1914	0.2127	1.3547
JW1526		eamA	0.8708	0.8801	0.358	0.3623	0.7996
JW1593	B1601	ydgG	0.9199	0.9316	0.3199	0.325	0.9444
JW0977	B0992	yccM	0.8279	0.9011	0.3296	0.3292	0.8633
JW0994	B1009	ycdJ	0.7997	0.8298	0.227	0.1987	1.2591
JW0996		ycdL	0.8991	0.8899	0.3434	0.2716	0.9569
JW1007	B1022	ycdQ	0.8308	0.8431	0.2967	0.2226	1.0603
JW1042	B1055	yceA	0.847	0.8325	0.283	0.26	1.0174
JW1052	B1065	yceL	0.8859	0.8613	0.0897	0.0594	3.8547
JW1086	B1100	ycfH	0.7885	0.8016	0.2668	0.3334	0.8715
JW1099			0.8996	0.9221	0.3044	0.3274	0.9485
JW1120	B1134	ymfB	0.9338	0.9361	0.3269	0.3135	0.9605
JW1143		stfE	0.8587	0.8839	0.3339	0.3642	0.8211
JW1150	B1163	ycgF	0.9227	0.9217	0.2987	0.3707	0.9063
JW1155		ycgG	0.7859	0.7667	0.3111	0.2764	0.8693
JW1157		(ydeU)	0.8946	0.9108	0.4028	0.3363	0.8035
JW1160		JW5178	0.9078	0.8967	0.389	0.3531	0.7999
JW1161		JW5179	0.8203	0.8279	0.3068	0.3013	0.8916
JW1168	B1179	ycgL	0.7881	0.7852	0.278	0.2952	0.9029
JW1193	B1202	ycgV	0.9456	0.9441	0.3094	0.2899	1.0372
JW1197		ychM	0.8258	0.8265	0.3188	0.3331	0.8337
JW1210	B1219	ychN	0.8179	0.8325	0.2887	0.2623	0.9853
JW1211	B1220	ychO	0.9137	0.9232	0.3133	0.3302	0.939
JW1221	B1233	ychJ	0.8731	0.8692	0.4294	0.3853	0.7035
JW1272	B1280	yciM	0.7887	0.7346	0.1247	0.0807	2.4396
JW1278	B1285	yciR	0.887	0.8889	0.2443	0.2169	1.2666
JW1291	B1298	ycjL	0.9065	0.8955	0.3131	0.2732	1.011
JW1292	B1299	ycjC	0.8679	0.8854	0.2861	0.3006	0.983
JW1303	B1310	ycjN	0.923	0.9461	0.3063	0.2843	1.041
JW1309	B1316	ycjT	0.7712	0.7541	0.1574	0.1422	1.6747
JW1323	B1330	ynaI	0.9449	0.92	0.2871	0.3029	1.0398
JW1335		ydaM	0.8736	0.8795	0.1728	0.1527	1.7717
JW1336	B1342	ydaN	0.8816	0.8393	0.1922	0.1725	1.5522
JW1336.5			0.8894	0.8848	0.3081	0.3396	0.9011
JW1338	B1344	ydaO	0.817	0.8221	0.3073	0.3051	0.8804
JW1396		(ydbA)	0.8389	0.8277	0.2475	0.224	1.1627
JW1402	B1405	ydbA	0.9767	0.89	0.2168	0.2189	1.4093
JW1405	B1408	ynbA	0.9687	0.9364	0.2652	0.2609	1.1912
JW1430	B1434	ydcN	0.9054	0.8638	0.1931	0.284	1.2198
JW1434	B1439	ydcR	0.9529	1.0249	0.2608	0.2562	1.2584
JW1437	B1442	ydcU	0.8767	0.8641	0.3593	0.416	0.7386
JW1485		yddV	0.8372	0.837	0.1743	0.1726	1.5876
JW1486	B1491	yddW	0.9126	0.9317	0.3433	0.3175	0.9181
JW1515			0.7674	0.7408	0.1815	0.1637	1.4372
JW1527	B1534	ydeE	0.8833	0.8899	0.204	0.1819	1.5115
JW1636	B1644	ydhJ	0.9117	0.9464	0.3052	0.2881	1.0302
JW1646	B1654	ydhD	0.8975	0.9025	0.3011	0.3537	0.9043
JW1647		ydhO	0.783	0.7368	0.3128	0.2725	0.8542
JW1652	B1660	ydhC	0.8579	0.8506	0.2878	0.2318	1.0816
JW1655	B1663	norM	0.9083	0.9457	0.3118	0.3087	0.9829
JW1664	B1674	ydhY	0.8957	0.9115	0.3614	0.3474	0.8387
JW1673		sufB	0.8915	0.9096	0.3266	0.3213	0.9144
JW1680	B1690	ydiM	0.9039	0.9128	0.2012	0.2085	1.4586
JW1681		ydiN	0.8233	0.7752	0.1553	0.1631	1.6515
JW1686	B1696	ydiP	0.9018	0.9057	0.3821	0.3604	0.8008
JW1691		ydiD	0.9193	0.9228	0.3076	0.2872	1.0188
JW1716	B1727	yniC	0.8894	0.9064	0.2066	0.2064	1.4303
JW1747	B1758	ynjF	0.8221	0.7844	0.2422	0.2838	1.0047
JW1757	B1768	pncA	0.9132	0.9059	0.2189	0.2425	1.2969
JW1761		ydjH	0.9058	0.8844	0.2795	0.2758	1.0605
JW1774	B1785	yeaI	0.9547	0.9378	0.211	0.2291	1.4145
JW1775		yeaJ	0.9366	0.9461	0.3208	0.3006	0.9966
JW1802	B1813	yeaB	0.8945	0.8843	0.1657	0.2104	1.5558
JW1805	B1816	yoaE	0.9753	0.9903	0.3589	0.2626	1.0404
JW1824		yebU	0.889	0.9141	0.3293	0.3143	1.0415
JW1842	B1853	hexR	0.9667	0.9641	0.368	0.368	0.9752
JW1845		yebA	0.9416	0.9787	0.2961	0.2933	1.2112
JW1856		yecD	0.9703	0.9804	0.3433	0.3497	1.0464
JW1859	B1870	yecO	0.9345	0.9627	0.2112	0.2688	1.4693
JW1860	B1871	yecP	0.9657	0.946	0.4049	0.3827	0.9023
JW1896	B1908	yecA	0.838	0.8535	0.3663	0.3673	0.8572
JW1915	B1930	yedF	0.8177	0.8162	0.283	0.2268	1.1914
JW1917	B1932	yedL	0.9602	0.9873	0.4002	0.3916	0.9143
JW1939			0.9599	0.9085	0.2834	0.336	1.1214
JW1974		JW5326	0.9459	0.9678	0.3491	0.3549	1.0105
JW1980	B1998	JW1980	0.9685	0.9334	0.3218	0.3577	1.0405
JW2649	B2674	nrdI	0.9082	0.9206	0.3408	0.3908	0.9293
JW2659	B2684	mprA	0.9009	0.8634	0.3549	0.3787	0.894
JW2704	B2734	pphB	0.9358	0.9435	0.3519	0.3804	0.954
JW2752	B2781	mazG	0.9301	0.901	0.3193	0.3533	1.0121
JW2761	B2790	yqcA	0.9358	0.9435	0.3143	0.3009	1.1356
JW2791	B2823	ppdC	0.9075	0.9261	0.2569	0.2704	1.2927
JW2793		ppdB	0.9443	0.9604	0.3564	0.3299	1.0317
JW2822		x	0.9245	0.9126	0.3398	0.4004	0.9226
JW0527		JW0527	0.8798	0.9191	0.3546	0.4126	0.8717
JW0543	B0554	essD	0.9365	0.9493	0.3965	0.4396	0.8385
JW0571		hokE	0.9281	0.8488	0.2959	0.3516	1.0202
JW1361	B1368	ynaA	0.9354	0.9722	0.3023	0.308	1.162
JW1362			0.8774	0.9466	0.2038	0.2111	1.6343
JW1365	B1371	JW1365	0.9055	0.9128	0.3375	0.3538	0.9778
JW1366	B1372	stfR	0.8328	0.8587	0.2629	0.297	1.1231
JW1540	B1547	stfQ	0.8962	0.8873	0.3362	0.2545	1.1224
JW1551	B1559	ydfT	0.9119	0.9177	0.2691	0.3456	1.1065
JW0006	B0007	yaaJ	0.9305	0.9038	0.3462	0.3774	0.9424
JW0066	B0067	thiP	0.9122	0.8641	0.4063	0.3817	0.838
JW0068	B0069	yabN	0.9452	0.9565	0.3262	0.3604	1.0296
JW0151		eriC	0.9394	0.9713	0.3096	0.3085	1.1492
JW0187	B0191	yaeJ	0.9427	0.9577	0.358	0.3845	0.9515
JW0200	B0210	yafE	0.9034	0.9317	0.3753	0.3953	0.8853
JW0209		yafV	0.9023	0.9006	0.3161	0.2929	1.1005
JW0213	B0223	yafJ	0.9103	0.9195	0.3661	0.4284	0.8562
JW0255	B0263	afuB	0.9082	0.8826	0.383	0.3934	0.8575
JW0300	B0307	ykgF	0.9188	0.8916	0.3972	0.424	0.8195
JW0307	B0315	yahA	0.9068	0.9358	0.3521	0.3196	1.0198
JW0310	B0318	yahD	0.9365	0.9656	0.357	0.3696	0.9732
JW0312	B0320	yahF	0.9452	0.9948	0.3256	0.3807	1.0211
JW0350	B0359	JW0350	0.9112	0.9059	0.4007	0.4174	0.8257
JW0365		yaiU	0.8164	0.8116	0.3458	0.3894	0.8232
JW0373	B0382	yaiB	0.955	0.9634	0.3895	0.4462	0.8534
JW0376	B0385	yaiC	0.8968	0.8397	0.3521	0.3089	0.9766
JW0397	B0407	yajC	0.8833	0.8757	0.278	0.315	1.1027
JW0417		yajR	0.9094	0.8958	0.3111	0.3246	1.0557
JW0432	B0442	ybaV	0.9149	0.9334	0.4387	0.4519	0.7715
JW0434	B0444	ybaX	0.9006	0.8943	0.2993	0.3008	1.1119
JW0435	B0445	ybaE	0.8778	0.9025	0.3135	0.3806	0.9535
JW0444	B0454	ybaZ	0.8615	0.8513	0.1749	0.1945	1.7237
JW0446		ylaB	0.8789	0.8717	0.3787	0.4176	0.8173
JW0460	B0471	ybaB	0.8462	0.8804	0.3378	0.4146	0.8531
JW0467	B0478	ybaL	0.9201	0.8741	0.348	0.4159	0.8731
JW0470	B0481	ybaK	0.8933	0.8861	0.2587	0.3103	1.1625
JW0480		ybbM	0.8735	0.9111	0.294	0.3094	1.0995
JW0481		ybbN	0.9327	0.9422	0.3022	0.335	1.0938
JW0566	B0577	ybdG	0.9349	0.9615	0.3741	0.3858	0.9277
JW0621	B0626	ybeM	0.8312	0.8427	0.2959	0.3332	0.9891
JW0626	B0631	ybeD	0.631	0.6558	0.0095	0.0248	13.9465
JW0655	B0658	corC	0.9716	0.9447	0.3705	0.4086	0.9144
JW0659	B0662	ubiF	0.3805	0.3557	0.0754	0.0824	1.7343
JW0701	B0711	ybgJ	0.7941	0.7509	0.2382	0.2328	1.2194
JW0702	B0712	ybgK	0.8985	0.9124	0.386	0.4428	0.8123
JW0749	B0766	ybhA	0.9054	0.9206	0.2819	0.3218	1.1244
JW0753	B0770	ybhI	0.9489	0.9387	0.4039	0.4133	0.8587
JW0771	B0788	ybhN	0.8554	0.8361	0.314	0.3237	0.9861
JW0772	B0789	ybhO	0.844	0.8298	0.3601	0.4142	0.8036
JW0775		ybhR	0.954	0.9781	0.3455	0.3905	0.9759
JW0776			0.8612	0.8884	0.3658	0.3813	0.8706
JW0777	B0793	ybhS	0.9304	0.8948	0.3066	0.2946	1.1286
JW0779	B0795	ybhG	0.8898	0.8948	0.3504	0.3907	0.8952
JW0785	B0800	ybiB	0.8278	0.8297	0.3345	0.3634	0.8829
JW0801	B0817	mntR	0.814	0.7862	0.3684	0.3511	0.8268
JW0803	B0819	ybiS	0.889	0.878	0.283	0.3186	1.0919
JW0806	B0822	ybiV	0.866	0.8736	0.3469	0.3874	0.8807
JW0817	B0833	yliE	0.9772	0.9591	0.3314	0.3907	0.9968
JW0818	B0834	yliF	0.8581	0.834	0.3876	0.4114	0.7873
JW0819	B0835	yliG	0.8892	0.8851	0.2149	0.2289	1.4862
JW0822	B0838	yliJ	0.9518	0.9887	0.2527	0.2633	1.398
JW0828		ybjI	0.8802	0.8274	0.3447	0.405	0.8467
JW0829	B0845	ybjJ	0.8752	0.8471	0.3081	0.41	0.8916
JW0852		ybjS	0.8746	0.8721	0.2993	0.3735	0.9651
JW0853		ybjT	0.7922	0.7774	0.3311	0.3639	0.8396
JW0875	B0892	ycaJ	0.9025	0.9154	0.3521	0.3796	0.9236
JW0880	B0897	ycaC	0.8422	0.8154	0.2694	0.2943	1.0931
JW0881	B0898	ycaD	0.9905	0.9673	0.314	0.3112	1.1641
JW0882		ycaM	0.866	0.8865	0.2463	0.2692	1.2638
JW0892	B0909	ycaL	0.9722	0.9458	0.2968	0.2896	1.2159
JW0931	B0948	ycbY	0.9679	0.9538	0.3866	0.4026	0.9052
JW0948		yccU	0.8042	0.8401	0.1728	0.1703	1.7816
JW0950	B0967	yccW	0.8186	0.844	0.2482	0.2701	1.1925
JW0964	B0981	etk	0.9212	0.9157	0.2652	0.3004	1.2073
JW0970		ymcD	0.8855	0.8784	0.168	0.1514	2.053
JW2032	B2047	wcaJ	1.0496	0.9645	0.2639	0.3183	1.286
JW2035	B2050	wcaI	0.9869	1.0274	0.3792	0.3895	1.0482
JW2036		nudD	0.934	0.9421	0.3412	0.3541	1.0793
JW2040	B2055	wcaE	0.9624	0.9929	0.2919	0.3624	1.1954
JW2045	B2060	wzc	0.9685	0.9919	0.4181	0.3948	0.9646
JW2049	B2064	asmA	0.9326	0.9706	0.2722	0.276	1.3887
JW2087	B2100	yegV	0.9634	0.9752	0.2672	0.2591	1.4734
JW2093	B2106	yohM	0.9336	0.9058	0.386	0.363	0.9823
JW2116	B2128	yehW	0.8683	0.8684	0.3382	0.3111	1.0699
JW2118	B2130	yehY	0.9043	1.0127	0.3724	0.3471	1.0657
JW2124	B2136	yohD	0.8422	0.8909	0.3355	0.3368	1.0311
JW2125	B2137	yohF	0.9263	0.9556	0.3703	0.3987	0.9789
JW2153	B2166	yeiC	0.7584	0.7462	0.2988	0.323	0.9679
JW2160	B2172	yeiQ	0.8995	0.9372	0.4271	0.3993	0.889
JW2166	B2178	yejB	0.7107	0.7793	0.3163	0.3391	0.9094
JW2167	B2179	yejE	0.9351	0.9395	0.4255	0.4377	0.8687
JW2168	B2180	yejF	0.9175	0.9072	0.2863	0.2589	1.3387
JW2204	B2216	yojN	0.9285	0.9387	0.2764	0.256	1.4029
JW2243	B2249	cinA	0.9358	0.9505	0.2917	0.3572	1.1628
JW2287	B2290	yfbQ	0.9125	0.9376	0.3526	0.3923	0.9935
JW2339	B2342	yfcY	0.8993	0.9031	0.4122	0.4069	0.8802
JW2376	B2379	yfdZ	0.9291	0.9147	0.4494	0.4037	0.8645
JW2430	B2437	eutR	0.9353	0.8933	0.4394	0.3766	0.8964
JW2438	B2454	eutJ	0.9724	0.987	0.3928	0.3129	1.1106
JW2506		sseB	0.8718	0.9636	0.2866	0.3096	1.2314
JW2516	B2532	yfhQ	1.0238	0.9799	0.3189	0.419	1.0862
JW2522	B2538	hcaE	0.7762	0.8497	0.3424	0.3434	0.9483
JW2546	B2562	yfhL	0.9754	0.9813	0.3096	0.3155	1.2521
JW2561	B2577	yfiE	0.9358	0.9364	0.363	0.4217	0.9544
JW2565	B2581	yfiF	0.9397	0.9496	0.4109	0.4064	0.9247
JW2586	B2605	yfiB	0.9291	0.9361	0.2917	0.2973	1.2667
JW2615	B2634	yfjR	0.8222	0.8421	0.4163	0.3648	0.8523
JW2619	B2638	yfjU	0.9422	0.8937	0.2641	0.2847	1.3381
JW2620	B2639	yfjV	1.0203	1.0635	0.4259	0.4778	0.9223
JW2677		gutQ	0.8976	0.9179	0.3987	0.4129	0.8948
JW2679			0.9464	0.9375	0.4124	0.4051	0.9218
JW2705	B2735	ygbI	0.9495	0.9562	0.383	0.3754	1.0051
JW2736	B2766	ygcN	0.9622	0.9466	0.2933	0.2905	1.3078
JW2737	B2767	ygcO	0.8416	0.8469	0.2357	0.2243	1.4683
JW2739		ygcQ	0.795	0.8233	0.189	0.2075	1.6326
JW2740		ygcR	0.9927	0.9974	0.3596	0.377	1.0807
JW2741		ygcS	0.9351	0.9187	0.3503	0.3815	1.0133
JW2780		ygdI	0.9184	0.9051	0.3962	0.3912	0.9263
JW2781	B2810	csdA	0.9838	1.0035	0.3103	0.2739	1.3607
JW2823		ygeK	0.9536	0.9211	0.4483	0.4075	0.8762
JW2833	B2865	ygeR	1.0004	1.0082	0.4085	0.3862	1.011
JW0184	B0189	rof	0.9285	0.935	0.3588	0.3595	1.0377
JW0210	B0220	ivy	0.8602	0.8902	0.334	0.3398	1.0391
JW0325	B0334	prpD	0.9629	0.9549	0.2587	0.2894	1.3996
JW0436	B0446	cof	0.9408	0.8785	0.4112	0.4154	0.8804
JW0536	B0548	ninE	0.8998	0.9121	0.3883	0.4198	0.8969
JW0600	B0607	ybdQ	0.9263	0.9546	0.4311	0.4026	0.9024
JW0605	B0613	citG	0.8292	0.8162	0.1628	0.1607	2.0345
JW0619	B0624	crcB	0.8127	0.8178	0.3643	0.364	0.8955
JW0697	B0707	ybgA	0.9432	0.9943	0.3493	0.3616	1.0902
JW1395	B1400	paaY	0.8804	0.8867	0.2482	0.2902	1.3129
JW1823	B1834	yebT	0.9851	0.943	0.271	0.2561	1.4632
JW1936	B1952	dsrB	0.962	0.9409	0.3335	0.3909	1.0507
JW2133	B2146	yeiT	0.9448	0.9388	0.3415	0.3858	1.0359
JW2164	B2176	rtn	0.9649	0.968	0.4497	0.3917	0.9189
JW2311		dedD	0.7412	0.7665	0.4124	0.3453	0.7959
JW2314	B2317	dedA	0.8725	0.8629	0.487	0.4595	0.7334
JW2318	B2321	div	0.9721	0.9611	0.3998	0.3614	1.0159
JW2381	B2384	ypdE	0.9271	0.9453	0.3115	0.3387	1.1519
JW2383	B2386	ypdG	0.8657	0.8631	0.3134	0.2991	1.129
JW2384		ypdH	0.9246	0.9406	0.3283	0.3456	1.1071
JW2411	B2418	pdxK	0.915	0.9108	0.3397	0.3397	1.0749
JW2422	B2429	yfeV	0.9499	0.9344	0.4249	0.4054	0.9078
JW2431	B2438	eutK	0.972	0.9833	0.3157	0.3122	1.2456
JW2440	B2456	eutN	0.9783	0.9542	0.4265	0.4301	0.9024
JW2441	B2457	eutM	0.9395	0.9462	0.3596	0.3831	1.0156
JW2515	B2531	yfhP	0.9809	0.9917	0.3923	0.4153	0.977
JW2640	B2665	ygaU	0.972	0.9372	0.28	0.2464	1.4508
JW3067	B3096	yqjB	0.9792	0.9768	0.3708	0.4034	1.0106
JW3402	B3439	yhhW	0.9194	0.8896	0.4026	0.4018	0.8996
JW0005	B0006	yaaA	0.9201	0.921	0.5337	0.3827	0.8036
JW0010	B0011	yaaW	0.992	0.9598	0.3949	0.3705	1.02
JW0065	B0066	thiQ	0.9528	0.9648	0.4135	0.3876	0.9575
JW0125	B0129	yadI	0.9803	0.9889	0.4254	0.3657	0.9957
JW0131	B0135	yadC	0.9266	0.9309	0.3882	0.3684	0.982
JW0137	B0141	yadN	0.9295	0.9063	0.3235	0.338	1.1101
JW0140		yadB	0.9722	0.9663	0.3187	0.3079	1.2375
JW0193	B0197	metQ	0.897	0.8795	0.3503	0.3898	0.9601
JW0216	B0226	dinJ	0.9096	0.8996	0.3177	0.3335	1.1113
JW0294		ykgA	0.88	0.8987	0.3687	0.41	0.9137
JW0308	B0316	yahB	0.8878	0.8544	0.3732	0.3887	0.9147
JW0309	B0317	yahC	0.8798	0.8414	0.348	0.3828	0.9421
JW0317	B0325	yahK	0.8822	0.8442	0.4583	0.4491	0.761
JW0360	B0368	tauD	0.9368	0.9015	0.3747	0.3703	0.987
JW0402		yajI	0.9708	0.9687	0.3874	0.4653	0.9098
JW0409	B0419	yajO	0.8891	0.9414	0.3617	0.3833	0.9828
JW0424	B0434	yajG	0.9069	0.9036	0.3553	0.4445	0.9055
JW0437	B0447	ybaO	0.9087	0.84	0.3062	0.3982	0.993
JW0443	B0453	ybaY	0.9377	0.9019	0.4274	0.4384	0.8499
JW0474	B0485	ybaS	0.8853	0.9161	0.4411	0.4617	0.7981
JW0524		fimZ	0.8226	0.8155	0.3548	0.3975	0.871
JW0534	B0546	ybcM	0.8638	0.8643	0.2842	0.3158	1.1521
JW0592	B0599	ybdH	0.8657	0.844	0.2493	0.2869	1.0593
JW0645	B0650	hscC	0.9259	0.9141	0.3016	0.3067	1.0049
JW0673	B0686	ybfF	0.8959	0.8099	0.2784	0.271	1.0315
JW0705		abrB	0.8629	0.8545	0.2702	0.3349	0.9429
JW0735	B0752	zitB	0.8849	0.8526	0.2981	0.2988	0.9671
JW0835	B0851	nfsA	0.8622	0.9043	0.3284	0.3401	0.8779
JW0862	B0878	macA	0.8483	0.842	0.3088	0.308	0.9104
JW0863	B0879	macB	0.8971	0.86	0.3509	0.3027	0.8931
JW0883	B0900	ycaN	0.8253	0.8584	0.287	0.2897	0.9699
JW0884	B0901	ycaK	0.8926	0.913	0.3029	0.3074	0.9829
JW0927		ycbF	0.8777	0.8564	0.3241	0.2785	0.956
JW0938	B0955	ycbZ	0.8883	0.9301	0.3165	0.3158	0.9554
JW0965		etp	0.8252	0.8282	0.3093	0.2815	0.9298
JW0967	B0984	ymcA	0.8607	0.8591	0.2739	0.38	0.8738
JW0969	B0986	ymcC	0.9099	1.1632	0.3015	0.3423	1.0698
JW1194	B1203	ychF	0.8157	0.8182	0.0896	0.0764	3.27
JW1276	B1284	yciT	0.7985	0.7878	0.1846	0.1836	1.4313
JW1372	B1378	ydbK	0.8696	0.8444	0.279	0.3072	0.9714
JW1403	B1406	ydbC	0.869	0.859	0.3467	0.312	0.8715
JW1446	B1451	yncD	0.8876	0.8754	0.2903	0.317	0.9645
JW1482		yddS	0.868	0.8674	0.2693	0.2875	1.0355
JW1498	B1504	ydeS	0.8417	0.8632	0.2865	0.3147	0.9421
JW1505	B1512	ydeW	0.895	0.8674	0.383	0.4043	0.7437
JW1507	B1514	ydeY	0.8933	0.8863	0.337	0.3146	0.9073
JW1508	B1515.1	ydeZ	0.7445	0.7089	0.1441	0.1526	1.6274
JW1509	B1516	yneA	0.9511	0.8973	0.2106	0.24	1.3628
JW1517	B1524	yneH	0.9232	0.8831	0.3165	0.311	0.9563
JW1519	B1526	yneJ	0.8204	0.823	0.2696	0.3114	0.9397
JW1533	B1540	ydfH	0.9208	0.9086	0.2962	0.2536	1.1054
JW1535	B1542	ydfI	0.8732	0.8353	0.2517	0.3525	0.9394
JW1546	B1554	ydfQ	0.9116	0.9244	0.3133	0.3435	0.9287
JW1558	B1566	flxA	0.8449	0.8116	0.2948	0.3491	0.8547
JW1588	B1596	ynfM	0.9498	0.8993	0.243	0.228	1.3043
JW1592	B1600	ydgF	0.8545	0.872	0.303	0.33	0.9061
JW1598	B1606	ydgB	0.864	0.8436	0.2922	0.254	1.0386
JW1616		ydgJ	0.8559	0.9154	0.2874	0.3106	0.9841
JW1639	B1647	ydhF	0.8631	0.8717	0.3298	0.2872	0.9341
JW1641		ydhM	0.8382	0.8645	0.3472	0.2332	0.9746
JW1649	B1657	ydhP	0.914	0.9132	0.2782	0.3145	1.0242
JW1672	B1682	sufC	0.8118	0.8549	0.3051	0.2697	0.9633
JW1687		ydiQ	0.8186	0.7728	0.2511	0.2495	1.0561
JW1688	B1698	ydiR	0.8894	0.8973	0.2144	0.2672	1.2325
JW1689	B1699	ydiS	0.807	0.8597	0.2531	0.2687	1.0612
JW1690	B1700	ydiT	0.9998	1.0105	0.2585	0.2263	1.3776
JW1732	B1743	spy	0.8846	0.8943	0.2938	0.3095	0.9796
JW1739	B1750	ydjX	0.8723	0.8198	0.3246	0.2899	0.9148
JW1741	B1752	ydjZ	1.0586	1.0165	0.3898	0.3263	0.9627
JW1746		ynjE	0.7714	0.7638	0.1115	0.1101	2.3016
JW1759	B1770	ydjF	0.926	0.9026	0.2484	0.2952	1.1176
JW1760	B1771	ydjG	0.8743	0.8945	0.2614	0.2678	1.1104
JW1763	B1774	ydjJ	0.8324	0.8751	0.2105	0.2161	1.3298
JW1770	B1781	yeaE	0.9097	0.9123	0.2845	0.2859	1.0612
JW1779	B1790	yeaM	0.9029	0.9237	0.3342	0.3201	0.9275
JW1836	B1847	yebF	0.8042	0.8067	0.2167	0.235	1.1848
JW1949	B1966	(yedS)	0.826	0.8239	0.3562	0.3115	0.8209
JW1959			0.8308	0.7647	0.2585	0.2082	1.1358
JW1968	B1990	erfK	0.8372	0.8478	0.2653	0.2777	1.0309
JW1983	B2001	yeeR	0.9235	0.8998	0.2851	0.2782	1.0754
JW0054	B0055	djlA	0.8117	0.8407	0.2436	0.2331	1.1516
JW0173	B0178	hlpA	0.783	0.811	0.2972	0.3256	0.8503
JW0189		yaeF	0.848	0.9005	0.3113	0.3078	0.9383
JW0521	B0532	sfmD	0.9026	0.9211	0.2904	0.3187	0.9947
JW0557	B0568	nfrA	0.8411	0.8623	0.2638	0.256	1.0887
JW0800	B0815	ybiP	0.9483	0.913	0.3881	0.3481	0.84
JW0849	B0865	ybjP	0.8043	0.8362	0.2681	0.3203	0.9263
JW0923	B0940	ycbS	0.8639	0.8914	0.2417	0.2457	1.1965
JW0966	B0983	yccZ	0.8707	0.9013	0.2579	0.2957	1.0634
JW1020	B1037	csgG	0.8717	0.833	0.2145	0.2506	1.2177
JW1021	B1038	csgF	0.8617	0.8842	0.2683	0.2901	1.0387
JW1374	B1379	hslJ	0.8776	0.8891	0.2737	0.3021	1.0194
JW1677	B1687	ydiJ	0.9033	0.8914	0.3048	0.2762	1.0262
JW1956	B1973	yodA	0.8807	0.8304	0.323	0.2497	0.9926
JW2030	B2045	wcaK	0.9177	0.8774	0.1903	0.2169	1.4646
JW2069		yegR	0.8679	0.8907	0.2742	0.2784	1.0573
JW2329	B2332	yfcO	0.9919	0.9748	0.2993	0.2782	1.1314
JW2479	B2494	yfgC	0.8159	0.8037	0.2919	0.3076	0.8975
JW2618	B2637	yfjT	0.8716	0.8858	0.3143	0.2975	0.9543
JW2876	B2908	pepP	0.83	0.8325	0.2648	0.3033	0.9722
JW3003		tolC	0.7664	0.7458	0.1325	0.1357	1.8732
JW3183	B3216	yhcD	0.8254	0.8646	0.3533	0.3449	0.8042
JW3287		gspD	0.7857	0.7866	0.2777	0.2656	0.9615
JW3891	B3920	yiiQ	0.8255	0.8629	0.2408	0.3003	1.0366
JW4110	B4149	blc	0.8865	0.8836	0.2343	0.2649	1.178
JW1092	B1106	ycfN	0.8615	0.8635	0.2977	0.2827	0.9874
JW0141	B0145	dksA	0.7956	0.7558	0.0629	0.0621	4.1233
JW2511	B2527	hscB	0.754	0.77	0.2275	0.2006	1.1827
JW0426	B0436	tig	0.8646	0.8626	0.2842	0.2985	0.9848
JW1875	B1886	tar	0.7689	0.7443	0.2273	0.1957	1.1885
JW3795			0.8962	0.8382	0.2377	0.2653	1.1456
JW3751		rep	0.7628	0.7583	0.1427	0.1466	1.7468
JW1849	B1860	ruvB	0.8626	0.8413	0.3329	0.3475	0.832
JW3786	B3813	uvrD	0.8109	0.7667	0.1925	0.2123	1.2948
JW1279	B1286	rnb	0.8462	0.9009	0.2013	0.191	1.4796
JW0786	B0801	ybiC	0.8868	0.9098	0.178	0.1844	1.647
JW3547	B3575	yiaK	0.8619	0.8267	0.2524	0.2476	1.122
JW0505	B0517	allD	0.8783	0.8549	0.2013	0.1944	1.4552
JW3976	B4016	aceK	1.0461	1.0033	0.2993	0.3239	1.0925
JW1772	B1783	yeaG	1.0034	0.9691	0.2645	0.2922	1.1771
JW1827	B1838	pphA	0.9652	0.9919	0.275	0.2858	1.1594
JW3140	B3172	argG	0.9404	0.9373	0.3046	0.2981	1.035
JW1241	B1249	cls	0.9363	0.9543	0.3089	0.2927	1.0441
JW3331	B3368	cysG	0.9806	1.0016	0.3773	0.3202	0.9441
JW1794	B1805	fadD	0.8475	0.8701	0.2622	0.2659	1.0805
JW0008	B0009	mog	0.9615	0.9283	0.1629	0.1615	1.9354
JW4011	B4051	qor	1.0056	0.9973	0.2681	0.2733	1.2291
JW4130	B4172	hfq	0.2967	0.3181	0.0208	0.0184	5.2105
JW1667	B1677	lpp	0.6563	0.6124	0.3233	0.3481	0.6278
JW0599	B0606	ahpF	0.9049	0.9347	0.3398	0.3291	0.9137
JW3467	B3500	gor	0.6673	0.7119	0.1529	0.1255	1.6459
JW1627	B1635	gst	0.9101	0.9329	0.3133	0.2894	1.0159
JW3914	B3942	katG	0.9211	0.9376	0.3776	0.349	0.8499
JW3879	B3908	sodA	0.9363	0.9175	0.3198	0.3751	0.8863
JW1648	B1656	sodB	0.9368	0.9195	0.2619	0.2593	1.1833
JW1638	B1646	sodC	0.9894	1.0128	0.3653	0.4027	0.8661
JW1317	B1324	tpx	0.8471	0.8719	0.2223	0.1956	1.3666
JW0425		bolA	0.9231	0.9584	0.3758	0.4002	0.8055
JW1329	B1335	ogt	0.8481	0.8189	0.2288	0.2256	1.2188
JW0217	B0227	yafL	0.9184	0.9017	0.3895	0.3997	0.7662
JW2728	B2758	ygcJ	0.8419	0.9495	0.2622	0.2457	1.1718
JW2766	B2795	ygdH	0.8364	0.8601	0.3043	0.3031	0.9279
JW2792		ygdB	1.0217	1.0098	0.3407	0.3725	0.9463
JW2801	B2833	ygdR	0.9486	0.9712	0.3605	0.3987	0.8401
JW2814		yqeH	0.9242	0.9194	0.281	0.3259	1.0092
JW2819	B2851	ygeG	0.8963	0.9175	0.3481	0.3321	0.8859
JW2820	B2852	ygeH	0.7859	0.7992	0.2142	0.186	1.3159
JW2832		ygeQ	0.9216	0.9197	0.3112	0.2765	1.0409
JW0207	B0218	yafU	0.9449	0.8838	0.395	0.4309	0.7356
JW0222	B0232	yafN	0.8652	0.9329	0.3255	0.2931	0.9657
JW0273	B0279	yagM	0.917	0.8797	0.2657	0.2565	1.1431
JW0274	B0280	yagN	0.8913	0.9236	0.2952	0.3477	0.9379
JW0288		ykgK	0.9365	0.953	0.4317	0.4674	0.6982
JW0289		ykgL	0.8997	0.9213	0.3961	0.49	0.6827
JW0296		ykgI	0.8919	0.8736	0.2757	0.2969	1.0244
JW0302	B0310	ykgH	0.9135	0.9583	0.3731	0.4432	0.7618
JW0314		yahH	0.8378	0.9211	0.2967	0.2629	1.0442
JW0319		yahM	0.9813	0.9752	0.2717	0.2742	1.1907
JW0498	B0510	ybbV	0.943	0.9481	0.259	0.3138	1.0968
JW0507	B0519	(ylbE)	0.9612	0.9759	0.3579	0.3635	0.8921
JW0532	B0544	ybcK	0.8107	0.7957	0.2095	0.1569	1.4566
JW0547		ybcV	0.8768	0.8879	0.3876	0.4169	0.7287
JW0548	B0559	ybcW	0.839	0.8291	0.243	0.2483	1.128
JW0551	B0562	ybcY	0.9352	0.939	0.3339	0.3689	0.886
JW0552	B0563	ylcE	0.7554	0.7765	0.232	0.2091	1.1538
JW0651			0.9615	0.9283	0.2729	0.2398	1.2246
JW0658	B0661	yleA	0.9874	1.0016	0.2767	0.3617	1.0351
JW0676	B0689	ybfP	0.8923	0.9587	0.414	0.4246	0.7333
JW0724	B0734.1	ybgT	0.8499	0.8494	0.2512	0.2303	1.1725
JW0782			0.9491	0.9594	0.3946	0.4152	0.783
JW0793		ybiO	0.9268	0.9072	0.3572	0.3635	0.8454
JW0825		ybjG	0.9066	0.9188	0.3584	0.3855	0.8152
JW0832	B0848	ybjM	0.8308	0.8928	0.3195	0.3385	0.8703
JW0962	B0979.1	yccB	0.8637	0.9292	0.3135	0.3133	0.9503
JW1045	B1058	yceO	0.9254	0.9374	0.3076	0.2927	1.0309
JW1123	B1137	ymfD	0.9193	0.9307	0.3661	0.3676	0.8377
JW1124		ymfE	0.9609	0.9631	0.2992	0.3201	1.0321
JW1128	B1142	ymfH	0.9768	0.9665	0.4303	0.4527	0.7312
JW1129		ymfI	0.9658	0.8883	0.3021	0.3047	1.0151
JW1130	B1144	ymfJ	0.8267	0.8485	0.2992	0.3254	0.891
JW1147	B1160	elbA	0.8281	0.8732	0.3292	0.3514	0.8305
JW1148	B1161	ycgX	0.7654	0.8167	0.2126	0.2126	1.2362
JW1152	B1165	ymgA	0.9748	0.9805	0.2639	0.2803	1.1937
JW1153	B1166	ymgB	0.7802	0.8221	0.2834	0.2699	0.9621
JW1156	B1168.1	ymgF	0.9152	0.9855	0.3762	0.4176	0.7955
JW1162	B1173	JW1162	0.8647	0.8861	0.3983	0.4153	0.7149
JW1185	B1196	ycgY	0.9482	0.9543	0.3523	0.3836	0.8589
JW1280		yciW	0.9651	0.9441	0.3445	0.3773	0.8788
JW1321.5			0.8286	0.8567	0.2626	0.2577	1.0761
JW1340		ydaQ	0.8416	0.8047	0.2387	0.2408	1.1407
JW1350		ydaG	0.893	0.9024	0.2121	0.2303	1.3483
JW1352	B1357	ydaS	0.6467	0.623	0.1425	0.1455	1.4647
JW1369	B1375	ynaE	0.869	0.883	0.3244	0.3316	0.8873
JW1404		ydbD	0.8536	0.8305	0.3338	0.3574	0.8095
JW1440		ydcX	0.7744	0.7546	0.2412	0.2581	1.0174
JW1450		yncH	0.8356	0.824	0.2342	0.2515	1.1352
JW1454		JW5237	0.7767	0.7564	0.222	0.212	1.1736
JW1465			0.9386	0.9242	0.2309	0.2289	1.346
JW1466	B1470	yddJ	0.9845	0.9383	0.2695	0.3307	1.0643
JW1467	B1471	yddK	0.9389	0.9572	0.3243	0.3601	0.9204
JW1503	B1510	ydeK	0.8354	0.9074	0.3453	0.365	0.8152
JW1518		yneI	0.9485	0.938	0.3227	0.3483	0.934
JW1557	B1565	ydfV	0.9356	0.9065	0.2288	0.2336	1.3235
JW1635	B1643	ydhI	0.8331	0.8692	0.2207	0.2492	1.2036
JW1713	B1724	ydiZ	0.9673	0.9666	0.3303	0.3274	0.9769
JW1719	B1730	ydjO	0.7379	0.7673	0.1883	0.1642	1.4186
JW1742	B1753	ynjA	0.9943	0.934	0.2641	0.2426	1.2643
JW1777			0.8698	0.8908	0.3532	0.4083	0.7681
JW1799		yoaC	0.9371	0.9513	0.3034	0.395	0.8983
JW1810			0.8981	0.8941	0.2716	0.2882	1.0636
JW1815	B1826	yobG	0.8894	0.9358	0.3917	0.4182	0.7487
JW1866		yecT	0.9463	0.9835	0.2748	0.3311	1.0581
JW1918	B1933	(yedN)	0.7302	0.7695	0.1868	0.1757	1.3745
JW1919		yedN	0.9049	0.8517	0.2274	0.2219	1.2989
JW1920	B1935	yedM	0.8813	0.8684	0.1522	0.1662	1.6961
JW1953	B1970	yedX	0.9362	0.9563	0.389	0.3134	0.8316
JW1998	B2016	yeeZ	0.9521	0.964	0.1959	0.2419	1.3508
JW2158		yeiW	0.8923	0.8345	0.2031	0.1881	1.3624
JW2268	B2273	yfbN	0.8973	0.8884	0.2501	0.2582	1.0843
JW2269	B2274	yfbO	0.9845	0.9643	0.4157	0.3616	0.7738
JW0601	B0608	ybdR	0.982	0.9569	0.4331	0.3062	0.8094
JW1222	B1234	ychK	0.8536	0.887	0.151	0.1387	1.8544
JW1306	B1313	ycjQ	0.9659	1.0045	0.2262	0.2609	1.2485
JW1765	B1776	ydjL	0.9157	0.9038	0.3742	0.3205	0.8084
JW3109	B3140	agaD	0.8644	0.867	0.2376	0.2206	1.1663
JW2261	B2266	elaB	0.8363	0.8836	0.1781	0.1663	1.5413
JW2262	B2267	elaA	0.9279	0.9231	0.3618	0.3181	0.8403
JW2802	B2834	tas	0.9552	0.9374	0.237	0.2401	1.2243
JW2835	B2867	xdhB	0.9004	0.9203	0.2347	0.1991	1.2954
JW2841	B2873	ygeZ	0.9158	0.9046	0.2661	0.2086	1.1836
JW2843	B2875	yqeB	0.9662	0.959	0.3163	0.2997	0.9646
JW2849	B2881	xdhD	0.8048	0.8114	0.292	0.2542	0.9133
JW2864	B2896	ygfX	0.9048	0.8893	0.2037	0.2131	1.3285
JW2865	B2897	ygfY	0.6178	0.5987	0.1724	0.1372	1.2127
JW2866	B2898	ygfZ	0.5474	0.5872	0.0895	0.0664	2.2462
JW2867	B2899	yqfA	0.931	0.9006	0.258	0.2407	1.1336
JW2868	B2900	yqfB	0.9686	0.9439	0.3551	0.294	0.9094
JW2870	B2902	ygfF	0.9522	0.9625	0.2976	0.2724	1.0368
JW2882	B2915	yqfE	0.9063	0.9162	0.3236	0.2714	0.9454
JW2887	B2920	ygfH	0.8966	0.8914	0.2831	0.2366	1.0619
JW2889	B2922	yggE	0.8634	0.8294	0.2686	0.2433	1.0206
JW2890	B2923	yggA	0.8051	0.8233	0.2274	0.2162	1.133
JW2891	B2924	yggB	0.8891	0.9098	0.2638	0.2446	1.0921
JW2895	B2928	yggC	0.8988	0.8957	0.3348	0.3209	0.8447
JW2896	B2929	yggD	0.8285	0.7574	0.4118	0.3589	0.6351
JW2897	B2930	yggF	0.9683	0.9377	0.2072	0.2254	1.3599
JW2919	B2952	yggT	0.8973	0.8989	0.2657	0.2274	1.1243
JW2921	B2954	yggV	0.8533	0.8735	0.251	0.2434	1.078
JW2922	B2955	yggW	0.899	0.8874	0.2936	0.2899	0.9449
JW2923	B2956	yggM	0.852	0.8691	0.1274	0.1151	2.1905
JW2927	B2960	yggH	0.9531	0.9513	0.381	0.349	0.8052
JW2929	B2962	yggX	0.9427	0.9423	0.3432	0.355	0.8333
JW2934	B2966	yqgA	0.9381	0.9375	0.3859	0.3425	0.7947
JW2935	B2968	yghD	0.9291	0.8912	0.2791	0.2185	1.1291
JW2938	B2971	yghG	0.911	0.9585	0.3597	0.3854	0.7744
JW2952	B2984	yghR	0.826	0.8301	0.2008	0.1762	1.3558
JW2954	B2986	yghT	0.8956	0.8769	0.3958	0.3677	0.7165
JW2966	B2998	yghW	0.954	0.9379	0.3346	0.3322	0.8757
JW2970	B3001	yghZ	0.9463	0.9545	0.3874	0.3868	0.7578
JW2985	B3017	sufI	0.9232	0.9265	0.2601	0.2864	1.0446
JW2990	B3022	ygiU	0.9296	0.9303	0.3451	0.3259	0.8555
JW2991		ygiV	0.9209	0.9076	0.2402	0.2351	1.1874
JW2992	B3024	ygiW	0.9086	0.9031	0.3484	0.3461	0.8051
JW2995	B3027	ygiZ	0.9097	0.9209	0.3734	0.3617	0.7686
JW2996	B3028	mdaB	0.8947	0.8915	0.3484	0.3613	0.7768
JW2997	B3029	ygiN	0.8195	0.8253	0.2052	0.1858	1.2983
JW2999	B3031	yqiA	0.925	0.8992	0.3707	0.3684	0.7618
JW3001	B3033	yqiB	0.9282	0.9183	0.3899	0.3656	0.7543
JW3002	B3034	nudF	0.8924	0.8778	0.3581	0.3398	0.7829
JW3006	B3038	ygiC	0.886	0.9646	0.2355	0.2103	1.2812
JW3007	B3039	ygiD	0.9725	0.9588	0.2301	0.2422	1.2621
JW3008	B3040	zupT	0.7764	0.7728	0.2292	0.2097	1.0894
JW3011	B3043	ygiL	0.9147	0.907	0.303	0.2884	0.9507
JW3022	B3050	yqiJ	0.8834	0.865	0.3077	0.2968	0.8927
JW3023	B3051	yqiK	0.8381	0.8153	0.374	0.3441	0.7106
JW3026	B3054	ygiF	0.9424	0.9414	0.3823	0.3691	0.7738
JW3027	B3055	ygiM	0.9342	0.9481	0.3612	0.3404	0.828
JW3031	B3059	ygiH	0.9121	0.9111	0.2223	0.2087	1.3056
JW3035	B3063	ygjE	0.8982	0.9218	0.2499	0.2169	1.2034
JW3040	B3068	mug	0.8684	0.875	0.3601	0.3275	0.7826
JW3041	B3070	yqjH	0.9199	0.9505	0.2727	0.2922	1.0219
JW3042	B3071	yqjI	0.943	0.8785	0.4504	0.4108	0.6528
JW3045	B3074	ygjH	0.927	0.9304	0.2804	0.3053	0.9788
JW3049		ygjI	0.852	0.8683	0.2012	0.1817	1.3867
JW3050	B3079	ygjJ	0.9211	0.9774	0.2523	0.3281	1.0096
JW3051	B3080	ygjK	0.9635	0.9468	0.2026	0.2087	1.4335
JW3053	B3082	ygjM	0.9432	0.9384	0.3615	0.3015	0.8759
JW3054	B3083	ygjN	0.8966	0.9043	0.3904	0.3737	0.7274
JW3057	B3086	ygjQ	0.9307	0.9205	0.3507	0.3784	0.7836
JW3060	B3089	ygjU	0.8763	0.8807	0.31	0.3322	0.8444
JW3061	B3090	ygjV	0.836	0.8249	0.3326	0.3505	0.7504
JW3066	B3095	yqjA	0.9713	1.0176	0.3171	0.2798	1.0284
JW3069	B3098	yqjD	0.9431	0.9851	0.2895	0.3576	0.9197
JW3070	B3099	yqjE	0.9744	0.9839	0.2523	0.2451	1.2151
JW3073	B3102	yqjG	0.9043	0.9085	0.2621	0.2454	1.1025
JW3074	B3103	yhaH	0.9222	0.9219	0.3636	0.3637	0.7826
JW3075	B3104	yhaI	0.8124	0.8712	0.2089	0.1986	1.2752
JW3097	B3128	garD	0.9531	0.9443	0.3573	0.3669	0.8086
JW3099	B3130	yhaV	0.908	0.9128	0.2727	0.3121	0.961
JW3111	B3142	yraH	0.9479	0.9388	0.3581	0.368	0.802
JW3114	B3145	yraK	0.7894	0.8016	0.2164	0.2164	1.1346
JW3116	B3147	yraM	0.959	0.9893	0.2916	0.2772	1.0572
JW3118	B3149	yraO	0.9088	0.9311	0.2981	0.2622	1.0135
JW3119	B3150	yraP	0.9373	0.9147	0.2757	0.2351	1.119
JW3120	B3151	yraQ	0.9337	0.9405	0.2896	0.2568	1.0587
JW3123	B3154	yhbP	0.8854	0.9055	0.202	0.168	1.4939
JW3124	B3155	yhbQ	0.9412	0.948	0.233	0.2449	1.2201
JW3125	B3156	yhbS	0.9494	0.9571	0.2773	0.2227	1.1769
JW3129	B3160	yhbW	0.9237	0.9275	0.2996	0.2729	0.998
JW3132	B3163	nlpI	0.5816	0.6017	0.2048	0.1994	0.9036
JW3147	B3180	yhbY	0.9048	0.9075	0.1402	0.1423	1.8071
JW3151	B3184	yhbE	0.9116	0.9058	0.2242	0.258	1.0617
JW3159	B3192	yrbC	0.7101	0.7428	0.1534	0.1616	1.2993
JW3160	B3193	yrbD	0.8174	0.806	0.1165	0.1415	1.7725
JW3161	B3194	yrbE	0.8296	0.8137	0.1462	0.1798	1.4199
JW3163	B3196	yrbG	0.9822	0.9585	0.208	0.2172	1.2857
JW3164	B3197	yrbH	0.9151	0.8784	0.2038	0.2617	1.0853
JW3165	B3198	yrbI	0.9495	0.9698	0.1741	0.1691	1.5753
JW3170	B3203	yhbH	0.8981	0.9065	0.2202	0.2513	1.0781
JW3172	B3205	yhbJ	0.9822	1.0044	0.2571	0.2549	1.093
JW3174	B3207	yrbL	0.892	0.9186	0.304	0.3184	0.8195
JW3182	B3215	yhcA	0.836	0.8697	0.169	0.1893	1.341
JW3188	B3219	yhcF	0.935	0.9302	0.3483	0.3329	0.7713
JW3189	B3220	yhcG	0.8626	0.859	0.2021	0.1992	1.2085
JW3190	B3221	yhcH	0.9007	0.8738	0.1465	0.2011	1.438
JW3201	B3232	yhcM	0.9147	0.8875	0.2177	0.2289	1.1367
JW3208	B3239	yhcO	0.9367	0.9173	0.1995	0.2056	1.2892
JW3209	B3240	yhcP	0.837	0.8286	0.186	0.1741	1.3029
JW3210	B3241	yhcQ	0.899	0.917	0.276	0.2554	0.9626
JW3217	B3248	yhdE	0.8837	0.9001	0.233	0.2766	0.986
JW3222	B3253	yhdH	0.879	0.8726	0.1784	0.1818	1.3698
JW3225	B3257	yhdT	0.9298	0.9458	0.2875	0.2932	0.9098
JW3228	B3260	yhdG	0.7623	0.7727	0.3616	0.3664	0.5939
JW3231	B3263	yhdU	0.9106	0.8704	0.1625	0.1704	1.507
JW3235	B3267	yhdV	0.9761	0.9765	0.2623	0.2614	1.0503
JW3241	B3280	yrdB	0.9039	0.9279	0.206	0.2152	1.2251
JW3245	B3284	smg	0.9079	0.8719	0.2342	0.2444	1.0475
JW3255	B3293	yhdN	0.9657	0.9593	0.3707	0.3668	0.7353
JW3305	B3343	yheL	0.7174	0.7048	0.0117	0.0127	16.4188
JW3306	B3344	yheM	0.7318	0.7637	0.0164	0.0163	12.8828
JW3307	B3345	yheN	0.5432	0.3748	0.0182	0.0179	7.1632
JW3310	B3348	slyX	0.9402	0.935	0.2332	0.2242	1.1548
JW3316	B3353	yheT	0.8942	0.8905	0.1885	0.1811	1.3602
JW3317	B3354	yheU	0.8909	0.8731	0.317	0.3685	0.7249
JW3318	B3355	prkB	0.9306	0.93	0.2308	0.2226	1.156
JW3319	B3356	yhfA	0.9092	0.9236	0.246	0.2222	1.1027
JW3325	B3362	yhfG	0.9299	0.8966	0.3634	0.3522	0.719
JW3327	B3364	tsgA	0.8729	0.8975	0.2631	0.2704	0.9348
JW3332	B3369	yhfL	0.8884	0.8999	0.2094	0.2148	1.1875
JW3339	B3376	yhfS	0.9413	0.922	0.2612	0.2362	1.0552
JW3344	B3381	yhfX	0.9064	0.9306	0.2412	0.2735	1.0054
JW3351	B3388	damX	0.9073	0.8987	0.2991	0.3165	0.8264
JW3356	B3393	yrfB	0.8462	0.8202	0.1826	0.184	1.2804
JW3357	B3394	yrfC	0.8931	0.8874	0.2265	0.2096	1.1501
JW3360	B3397	nudE	0.8044	0.7825	0.3233	0.331	0.6832
JW3365	B3402	yhgE	0.9271	0.9113	0.2344	0.2261	1.1246
JW3374	B3411	yhgA	0.889	0.8842	0.3123	0.346	0.7588
JW3377	B3414	yhgI	0.919	0.8687	0.2864	0.2601	0.9215
JW3397	B3434	yhgN	0.8747	0.8678	0.3169	0.3158	0.7758
JW3403	B3440	yhhX	0.8978	0.8783	0.3528	0.353	0.7089
JW3405	B3441	yhhY	0.9052	0.9154	0.378	0.3915	0.6665
JW3406	B3442	yhhZ	0.9117	0.8789	0.2416	0.2201	1.0925
JW3411	B3446	yrhB	0.891	0.8867	0.3128	0.3071	0.8078
JW3413	B3448	yhhA	0.9476	0.9412	0.3789	0.3875	0.6942
JW3424	B3459	yhhK	0.9073	0.8861	0.3292	0.2853	0.8221
JW3430	B3465	yhhF	0.7803	0.7366	0.1334	0.1707	1.4051
JW3432	B3467	yhhM	0.9805	0.9618	0.326	0.3439	0.8167
JW3433	B3468	yhhN	0.9478	0.9088	0.3902	0.4	0.6618
JW3435	B3470	sirA	0.7748	0.7663	0.0526	0.0481	4.311
JW3455	B3488	yhiJ	0.8993	0.8776	0.2581	0.2596	0.9668
JW3459	B3492	yhiN	0.9336	0.8939	0.3743	0.368	0.6935
JW3463	B3496	yhiP	0.9084	0.8502	0.3627	0.3481	0.6969
JW3466	B3499	yhiR	0.9195	0.9096	0.2413	0.335	0.894
JW3475	B3507	yhiF	0.9305	0.9098	0.2068	0.2436	1.151
JW3478	B3510	hdeA	0.8145	0.8315	0.1746	0.1939	1.2582
JW3479	B3511	hdeD	0.9217	0.9106	0.2954	0.2588	0.9313
JW3481	B3513	yhiU	0.8306	0.8548	0.2331	0.2194	1.0492
JW3482	B3514	yhiV	0.9967	0.9481	0.2642	0.2373	1.0924
JW3484	B3516	gadX	0.8995	0.8595	0.2256	0.2326	1.0814
JW3486	B3518	yhjA	0.9166	0.8851	0.238	0.2352	1.0725
JW3488	B3520	yhjB	0.8559	0.869	0.3898	0.3778	0.633
JW3490	B3522	yhjD	1.0146	1.0014	0.2713	0.2937	1.0051
JW3491	B3523	yhjE	0.93	0.9364	0.3366	0.349	0.7668
JW3503	B3535	yhjR	0.9098	0.9086	0.3038	0.3269	0.8122
JW3506	B3538	yhjU	0.8591	0.8409	0.3701	0.3573	0.6583
JW3507		ldrD	0.8381	0.7614	0.1898	0.188	1.1926
JW3508	B3539	yhjV	0.8558	0.7833	0.2241	0.2337	1.0086
JW3519	B3550	yiaC	0.9316	0.9371	0.2908	0.3013	0.889
JW3521		yiaD	0.9241	0.8935	0.2104	0.2368	1.1449
JW3524	B3555	yiaG	0.9868	0.9724	0.2915	0.248	1.023
JW3532		JW3532	1.0051	1.0001	0.2186	0.2259	1.2707
JW3533	B3561	yiaH	0.9179	0.936	0.2907	0.2919	0.8964
JW3542		bax	0.9556	0.9494	0.359	0.3796	0.7265
JW3546	B3574	yiaJ	0.9589	0.9555	0.3029	0.3043	0.8881
JW3549	B3577	yiaM	0.9357	0.9511	0.2775	0.2408	1.0255
JW3551	B3579	yiaO	0.7951	0.7334	0.2688	0.2657	0.8055
JW3558	B3586	yiaV	0.9246	0.92	0.3289	0.3069	0.8172
JW3559	B3587	yiaW	0.9437	0.9568	0.2528	0.2391	1.0883
JW3568	B3594	yibA	0.906	0.9145	0.2749	0.2743	0.9338
JW3570	B3596	yibG	0.9053	0.9154	0.2898	0.3644	0.784
JW3571	B3597	yibH	0.9296	0.8823	0.3205	0.3118	0.8072
JW3576		JW3576	0.6345	0.7702	0.195	0.1908	1.0256
JW3577	B3602	yibL	0.8763	0.8696	0.3085	0.3111	0.7937
JW3586	B3611	yibN	0.9253	0.9279	0.2438	0.2329	1.0951
JW3619	B3644	yicC	0.9264	0.9012	0.3331	0.3604	0.7423
JW3630	B3655	yicH	0.9342	0.9488	0.4148	0.245	0.8039
JW3633	B3659	setC	0.9892	0.9445	0.3484	0.2656	0.9486
JW3636.1		JW3636.1	0.9155	0.9195	0.3042	0.2684	0.9653
JW3640	B3665	yicP	0.8926	0.8514	0.2408	0.2327	1.1094
JW3651	B3675	yidG	0.9657	0.9144	0.2418	0.2722	1.1017
JW3652	B3676	yidH	0.9513	0.8641	0.2572	0.2679	1.0413
JW3653	B3677	yidI	0.9261	0.913	0.3061	0.2731	0.9564
JW3654	B3678	yidJ	0.7885	0.8758	0.3214	0.3292	0.7705
JW3655	B3679	yidK	0.9553	0.9708	0.2751	0.2664	1.0714
JW3674	B3697	yidA	1.0349	0.9641	0.3146	0.2775	1.0169
JW3688	B3710	yidY	0.9773	0.9301	0.2178	0.2812	1.1513
JW3690	B3712	yieE	0.8755	0.8593	0.2742	0.3056	0.9012
JW3691	B3713	yieF	0.9518	0.9241	0.2532	0.3138	0.9965
JW3692	B3714	yieG	0.7852	0.8048	0.1862	0.22	1.179
JW3693	B3715	yieH	0.9636	0.9314	0.2818	0.2546	1.0641
JW3694	B3716	yieI	0.8293	0.8094	0.2242	0.205	1.15
JW3695	B3717	yieJ	0.8348	0.8988	0.2391	0.2265	1.1215
JW3733	B3754	yieO	0.9627	0.9033	0.2083	0.2057	1.3576
JW3737	B3764	yifE	0.8028	0.8023	0.2401	0.2656	0.956
JW3738	B3765	yifB	0.9089	0.879	0.2788	0.2614	0.9969
JW3764		rffC	0.6438	0.6364	0.1304	0.1291	1.4859
JW3779	B3807	cyaY	0.8825	0.8761	0.234	0.2777	1.0352
JW3783	B3810	yigA	0.9321	0.8977	0.3402	0.3512	0.7971
JW3785	B3812	yigB	0.8541	0.854	0.3159	0.2666	0.8832
JW3790	B3817	yigF	0.8963	0.9337	0.1793	0.2081	1.4228
JW3809	B3832	rmuC	0.986	0.9534	0.2105	0.2953	1.1549
JW3830	B3858	yihD	0.9459	0.9055	0.2603	0.2189	1.1637
JW3834	B3862	yihG	0.8601	0.8663	0.2993	0.2798	0.8979
JW3837	B3866	yihI	0.9223	0.9209	0.2341	0.2782	1.0837
JW3843	B3872	yihL	0.9247	0.8779	0.295	0.39	0.7926
JW3844	B3873	yihM	0.9221	0.9071	0.2704	0.3041	0.959
JW3845	B3874	yihN	0.7314	0.7827	0.2621	0.2254	0.9355
JW3846	B3875	yshA	0.8972	0.9507	0.2123	0.2437	1.2206
JW3849	B3878	yihQ	0.9354	0.8913	0.2088	0.2396	1.2271
JW3850	B3879	yihR	0.9545	0.8571	0.2359	0.2779	1.062
JW3852	B3881	yihT	0.8741	0.8754	0.3154	0.3036	0.8513
JW3853	B3882	yihU	0.8997	0.8484	0.3401	0.3699	0.7416
JW3859	B3888	yiiD	0.9288	0.9266	0.2346	0.2337	1.1934
JW3867	B3896	yiiG	0.8728	0.8578	0.295	0.3314	0.8322
JW3871	B3900	frvA	0.9132	0.8826	0.2658	0.3716	0.8486
JW3886	B3915	yiiP	0.8963	0.9676	0.2615	0.2818	1.0333
JW3892	B3921	yiiR	0.998	0.912	0.2541	0.2383	1.1684
JW3893	B3922	yiiS	1.0016	0.9478	0.2914	0.2785	1.0303
JW3899	B3928	yiiU	0.8549	0.8586	0.2762	0.2549	0.9718
JW3908	B3937	yiiX	0.9463	0.9276	0.3113	0.3175	0.8976
JW3916	B3944	yijF	0.9232	0.9078	0.3647	0.3955	0.7255
JW3927	B3955	yijP	0.9147	0.9039	0.2288	0.253	1.1369
JW3936	B3964	yijD	0.7965	0.825	0.3267	0.3957	0.6761
JW3960		nudC	0.9539	0.9777	0.2808	0.2801	1.0373
JW3963	B3999	yjaG	0.9922	0.8808	0.3116	0.2724	0.966
JW3965	B4001	yjaH	0.8876	0.8677	0.3426	0.3078	0.8129
JW3972	B4012	yjaB	0.9591	0.9506	0.3177	0.286	0.9528
JW3982	B4022	yjbC	0.9185	0.8998	0.3048	0.3508	0.8354
JW3983	B4023	yjbD	0.8716	0.8832	0.3515	0.3478	0.7558
JW3986	B4026	yjbE	0.9443	0.9287	0.3295	0.2781	0.9285
JW3988	B4028	yjbG	0.8369	0.87	0.2401	0.2967	0.9578
JW3989	B4029	yjbH	0.8798	0.9418	0.1736	0.3279	1.0941
JW3990	B4030	psiE	0.9279	0.8754	0.245	0.257	1.082
JW3998	B4038	yjbI	0.9238	0.93	0.2909	0.2919	0.9581
JW4005	B4045	yjbJ	0.9025	0.9258	0.2942	0.3399	0.8685
JW4007	B4047	yjbL	0.8965	0.9201	0.318	0.5345	0.6418
JW4008	B4048	yjbM	0.9056	0.9114	0.296	0.3099	0.9033
JW4017	B4056	yjbQ	0.9358	0.9118	0.3244	0.3574	0.8162
JW4018	B4057	yjbR	0.9086	0.8989	0.2878	0.27	0.976
JW4022	B4061	yjcC	0.9806	0.9805	0.2404	0.2311	1.2528
JW4025	B4064	yjcD	0.9853	0.9577	0.3105	0.3022	0.9552
JW4026	B4065	yjcE	0.9225	0.8941	0.3503	0.3535	0.7774
JW4027	B4066	yjcF	0.963	0.9299	0.349	0.3277	0.8425
JW4028	B4067	yjcG	0.9439	0.9296	0.3214	0.3736	0.812
JW4029	B4068	yjcH	0.9411	0.9419	0.3662	0.3494	0.7926
JW4039	B4078	yjcO	0.9954	0.9605	0.313	0.2786	0.9958
JW4041	B4080	yjcP	0.893	0.8894	0.2199	0.1928	1.3009
JW4043	B4082	yjcR	0.9925	0.9664	0.2857	0.3239	0.9679
JW4069	B4108	phnA	0.9467	0.9339	0.2848	0.2477	1.0637
JW4070	B4109	yjdA	1.01	0.9191	0.3568	0.3935	0.7744
JW4076	B4115	yjdE	0.9632	0.9264	0.2852	0.2337	1.0969
JW4082	B4121	yjdF	0.9686	0.9657	0.3382	0.3625	0.8315
JW4087	B4126	yjdI	0.8647	0.8533	0.3558	0.4247	0.663
JW4088	B4127	yjdJ	0.9619	0.957	0.2592	0.303	1.0281
JW4089	B4128	yjdK	0.9612	0.915	0.297	0.2612	1.0124
JW4091	B4130	yjdL	1.0061	0.9967	0.2303	0.2815	1.1787
JW4101	B4141	yjeH	0.9392	0.8958	0.2338	0.2226	1.211
JW4105	B4145	yjeJ	1.0074	0.8575	0.2702	0.2881	1.0061
JW4106	B4146	yjeK	0.965	0.8443	0.2188	0.2422	1.1821
JW4118	B4157	yjeN	0.9897	0.9696	0.2574	0.2762	1.106
JW4119	B4158	yjeO	0.9685	0.953	0.3301	0.2591	0.9823
JW4120	B4159	yjeP	0.9635	0.9798	0.3208	0.3806	0.8345
JW4124	B4166	yjeS	0.9731	0.9483	0.3126	0.2502	1.0283
JW4134	B4176	yjeT	0.9259	0.9291	0.2145	0.2224	1.2789
JW4136	B4178	yjeB	0.9005	0.8803	0.2612	0.2479	1.0536
JW4138	B4180	yjfH	0.931	0.9159	0.2686	0.241	1.0916
JW4139	B4181	yjfI	0.9988	0.9881	0.2967	0.2567	1.0814
JW4140	B4182	yjfJ	0.847	0.8518	0.2672	0.2213	1.0475
JW4141	B4183	yjfK	0.9552	0.9561	0.2563	0.2498	1.1375
JW4142	B4184	yjfL	0.9662	1.0008	0.2695	0.2437	1.1545
JW4143	B4185	yjfM	0.9925	0.9704	0.2846	0.3085	0.9969
JW4144	B4186	yjfC	1.0256	1.0197	0.3162	0.3382	0.9414
JW4148	B4190	yjfP	0.9896	0.9806	0.2209	0.3209	1.2759
JW4149	B4191	yjfQ	0.9239	0.9483	0.2342	0.2642	1.318
JW4157	B4199	yjfY	0.9115	0.9182	0.29	0.2122	1.2784
JW4162	B4204	yjfZ	0.9371	0.9174	0.2823	0.2934	1.1303
JW4167	B4209	ytfE	0.9414	0.9281	0.2366	0.2354	1.3898
JW4169	B4211	ytfG	0.9817	0.9494	0.2477	0.2182	1.4543
JW4175	B4216	ytfJ	0.9553	0.9603	0.3319	0.2931	1.0754
JW4177	B4218	ytfL	0.9591	0.9527	0.3012	0.3032	1.1099
JW4179	B4220	ytfM	0.9812	0.9582	0.2517	0.2614	1.3262
JW4180	B4221	ytfN	0.9431	0.9709	0.2606	0.22	1.3974
JW4181	B4222	ytfP	0.8954	0.8653	0.3063	0.3177	0.99
JW4182	B4223	yzfA	0.8576	0.8681	0.2431	0.2303	1.2791
JW4186	B4227	ytfQ	0.8955	0.9159	0.3198	0.2935	1.0363
JW4193	B4234	yjgA	0.9168	0.919	0.3264	0.2716	1.0772
JW4205	B4246	pyrL	0.8917	0.9042	0.3613	0.3212	0.9233
JW4206	B4248	yjgH	0.9694	0.9706	0.2721	0.2924	1.2058
JW4207	B4249	yjgI	0.9656	0.9768	0.1843	0.2963	1.4181
JW4212	B4255	yjgD	0.9437	0.9607	0.2869	0.2847	1.169
JW4220	B4263	yjgR	0.9052	0.906	0.2856	0.2753	1.133
JW4258	B4296	yjhF	0.9004	0.891	0.3258	0.3221	0.9702
JW4259	B4297	yjhG	0.8654	0.8425	0.3536	0.3536	0.8474
JW4261	B4299	yjhI	0.8651	0.8966	0.3254	0.3895	0.8647
JW4268	B4306	yjhP	0.8751	0.9166	0.3625	0.3222	0.9182
JW4269	B4307	yjhQ	0.9273	0.9412	0.3549	0.2591	1.0678
JW4269.5		JW4269.5	0.9993	1.0012	0.2556	0.2973	1.2695
JW4271	B4308	yjhR	0.872	0.8774	0.2958	0.2813	1.0636
JW4288	B4325	yjiC	0.9421	0.9152	0.3053	0.3026	1.072
JW4292	B4329	yjiG	0.9018	0.9081	0.3606	0.3568	0.8852
JW4296		yjiK	0.8777	0.8805	0.3477	0.3352	0.9034
JW4296.5		JW4296.5	0.8914	0.8559	0.3161	0.3021	0.9917
JW4299	B4336	yjiN	0.8772	0.9123	0.3449	0.3435	0.9121
JW4300	B4337	yjiO	0.8935	0.9294	0.1939	0.2491	1.4438
JW4303	B4340	yjiR	0.8939	0.8973	0.2766	0.2246	1.254
JW4304	B4341	yjiS	0.8678	0.9207	0.3305	0.3326	0.9464
JW4316	B4353	yjiX	0.9232	0.9078	0.3522	0.3417	0.9259
JW4336	B4374	yjjG	0.8842	0.9162	0.3317	0.2856	1.0234
JW4340	B4377	yjjU	0.8992	0.865	0.3271	0.327	0.9464
JW4342	B4379	yjjW	0.9082	0.9018	0.3814	0.3848	0.8289
JW4343	B4380	yjjI	0.8367	0.8844	0.3893	0.3803	0.7847
JW4348	B4385	yjjJ	0.9443	0.9405	0.325	0.2632	1.1243
JW4350	B4387	smp	0.9097	0.9294	0.3613	0.2237	1.1031
JW4354	B4391	yjjK	0.905	0.8813	0.2855	0.2712	1.1259
JW4365	B4402	yjjY	0.9094	0.9011	0.3025	0.3207	1.0194
JW4366	B4403	lasT	0.9429	0.9505	0.3459	0.3333	0.9781
JW0387	B0397	sbcC	0.9195	0.9273	0.336	0.2954	1.0263
JW0456	B0467	priC	0.8989	0.8921	0.3398	0.3515	0.909
JW0461	B0472	recR	0.8348	0.899	0.4165	0.4332	0.716
JW0674	B0687	seqA	0.9113	0.9235	0.3385	0.2706	1.057
JW0698	B0708	phrB	0.9909	0.9868	0.301	0.2972	1.16
JW1048	B1061	dinI	0.9044	0.9022	0.2584	0.2926	1.1504
JW1100	B1114	mfd	0.8811	0.8794	0.3995	0.3602	0.8131
JW1173	B1184	umuC	0.9394	0.9333	0.3735	0.3559	0.9009
JW1343	B1349	recT	0.8521	0.8151	0.329	0.3565	0.8534
JW1355	B1360	ydaV	0.9368	0.938	0.3783	0.376	0.8721
JW1602	B1610	tus	0.8788	0.9295	0.3991	0.447	0.7499
JW1752	B1763	topB	0.9172	0.9425	0.3168	0.3312	1.007
JW1831	B1842.1	holE	0.9076	0.8845	0.255	0.2398	1.2708
JW1850	B1861	ruvA	0.8726	0.8861	0.3236	0.3218	0.9561
JW1852	B1863	ruvC	0.8097	0.8153	0.3291	0.2867	0.9259
JW1854	B1865	nudB	0.8924	0.8872	0.3773	0.3977	0.8057
JW1944	B1961	dcm	0.8915	0.8757	0.3221	0.318	0.9687
JW1991	B2009	gyrI	0.976	1.003	0.3487	0.3594	0.9806
JW2053	B2068	alkA	0.9384	0.9743	0.3902	0.3358	0.9244
JW2200	B2212	alkB	0.9484	0.9598	0.3135	0.2976	1.0956
JW3835	B3863	polA	0.9367	0.9214	0.2437	0.2341	1.3645
JW3906	B3935	priA	0.9159	0.8959	0.3499	0.3044	0.9716
JW4004	B4044	dinF	0.8904	0.8709	0.331	0.3548	0.9011
JW4019	B4058	uvrA	0.9742	0.9572	0.3513	0.3447	0.9737
JW4128	B4170	mutL	0.9108	0.9099	0.326	0.3489	0.9466
JW4159	B4201	priB	1.0046	0.9926	0.3646	0.2616	1.1191
JW4216	B4259	holC	0.8549	0.9399	0.3439	0.3418	0.9184
JW4311	B4348	hsdS	0.9869	0.975	0.2949	0.3288	1.1037
JW4312	B4349	hsdM	0.9446	0.9223	0.2972	0.2373	1.2255
JW4314	B4351	mrr	0.8483	0.9466	0.3426	0.314	0.9592
JW4326	B4362	dnaT	0.9014	0.8822	0.354	0.3702	0.8642
JW4334	B4372	holD	0.9385	0.9398	0.3827	0.3942	0.8483
JW0018	B0019	nhaA	0.9192	0.908	0.3997	0.3811	0.8211
JW0044	B0045	yaaU	0.957	0.9513	0.3562	0.3415	0.9597
JW0046	B0047	kefC	0.9484	0.9442	0.3892	0.3028	0.9596
JW0069	B0070	setA	0.9614	0.9728	0.367	0.3335	0.9688
JW0102	B0106	hofC	0.9367	0.9374	0.3135	0.3371	1.0107
JW0103	B0107	hofB	0.9286	0.9809	0.3196	0.3366	1.021
JW0108	B0112	aroP	0.9324	0.9345	0.4077	0.3162	0.9049
JW0123	B0127	yadG	0.9513	0.9609	0.397	0.3409	0.9093
JW0147	B0151	fhuC	0.9325	0.9497	0.36	0.3483	0.9324
JW0148	B0152	fhuD	0.9313	0.9637	0.3377	0.3107	1.0255
JW0149	B0153	fhuB	0.981	0.9756	0.3997	0.3504	0.9152
JW0195	B0199	metN	0.9572	0.9637	0.3578	0.3587	0.9407
JW0306	B0314	betT	0.9331	0.9311	0.2786	0.3262	1.0815
JW0327	B0336	codB	0.9581	0.9371	0.4098	0.332	0.8964
JW0332	B0341	cynX	0.9501	0.9389	0.3284	0.3672	0.9529
JW0358	B0366	tauB	0.9171	0.9291	0.3235	0.3873	0.9114
JW0359	B0367	tauC	0.9762	0.9758	0.2749	0.3795	1.0466
JW0386	B0396	araJ	0.9839	0.9992	0.272	0.2879	1.2428
JW0391	B0401	brnQ	0.9638	1.014	0.4302	0.42	0.8162
JW0438	B0448	mdlA	0.9984	0.9923	0.2618	0.2741	1.3034
JW0441	B0451	amtB	0.851	0.9519	0.277	0.2392	1.0681
JW0451	B0462	acrB	0.9778	1.0093	0.3129	0.286	1.0147
JW0454	B0465	kefA	0.9441	0.986	0.2446	0.3229	1.0401
JW0473	B0484	copA	0.8958	0.9513	0.3188	0.2525	0.9887
JW0475	B0486	ybaT	0.9265	0.9815	0.261	0.2627	1.1142
JW0479	B0490	ybbL	0.9531	0.9878	0.2886	0.2799	1.0441
JW0484	B0495	ybbA	0.9273	0.9638	0.2894	0.2924	0.994
JW0576	B0585	fes	0.8145	0.8681	0.1422	0.1593	1.7067
JW0579	B0587	fepE	0.9707	1.019	0.2296	0.2346	1.3108
JW0580	B0588	fepC	0.9137	0.9624	0.2825	0.2645	1.0489
JW0002	B0003	thrB	0.8406	0.9122	0.2831	0.258	0.9906
JW0036	B0037	caiC	0.9103	0.978	0.3022	0.2724	1.005
JW0070	B0071	leuD	0.8944	0.9829	0.3191	0.3154	0.9048
JW0071	B0072	leuC	0.9286	0.912	0.3436	0.3385	0.8252
JW0073	B0074	leuA	0.9147	0.907	0.3168	0.2712	0.9474
JW0074	B0075	leuL	0.9479	1.0043	0.2948	0.3116	0.9845
JW0077	B0078	ilvH	0.9424	1.0065	0.2461	0.2388	1.2291
JW0232	B0242	proB	0.914	0.9011	0.283	0.2626	1.0174
JW0233	B0243	proA	0.9046	0.9292	0.2996	0.2991	0.9367
JW0253	B0261	mmuM	0.9103	0.9131	0.2785	0.2946	0.973
JW0266	B0273	argF	0.9141	0.9239	0.2864	0.2832	0.9868
JW0377	B0386	proC	0.8583	0.8706	0.3286	0.3443	0.7857
JW0379	B0388	aroL	0.9657	1.0145	0.2918	0.3021	1.0196
JW0381	B0390	aroM	0.92	0.9232	0.2511	0.2359	1.1574
JW0593	B0600	ybdL	0.9412	0.9823	0.257	0.2587	1.1406
JW0854	B0870	ltaE	0.877	0.8974	0.2642	0.2498	1.0557
JW0890	B0907	serC	0.9259	0.9318	0.266	0.252	1.0967
JW0891	B0908	aroA	0.6574	0.7023	0.1363	0.1243	1.5956
JW0911	B0928	aspC	0.6862	0.7321	0.2561	0.2601	0.8402
JW0989	B1004	wrbA	0.9362	0.9646	0.2385	0.257	1.1731
JW1046	B1059	solA	0.9568	0.9556	0.3141	0.271	0.9995
JW1252	B1260	trpA	0.7547	0.7625	0.0839	0.0831	2.7783
JW1253	B1261	trpB	0.7777	0.8017	0.18	0.1609	1.4168
JW1255	B1263	trpD	0.8644	0.87	0.2608	0.2561	1.0261
JW1256	B1264	trpE	0.9201	0.9567	0.3068	0.2941	0.9551
JW1295	B1302	goaG	0.9087	0.9239	0.2496	0.3084	1.0044
JW1383	B1388	paaA	0.9537	0.9544	0.3138	0.3186	0.9227
JW1384	B1389	paaB	0.9622	0.9679	0.3079	0.3323	0.922
JW1385	B1390	paaC	0.9477	0.9643	0.3012	0.2883	0.9919
JW1387	B1392	paaE	0.9528	1.0009	0.2888	0.2762	1.0575
JW1391	B1396	paaI	0.9095	0.9676	0.2589	0.2248	1.1868
JW1392	B1397	paaJ	0.9019	0.9284	0.3385	0.2963	0.8817
JW1394	B1399	paaX	0.8994	0.9364	0.32	0.2955	0.9121
JW1576	B1584	speG	0.9636	0.9957	0.274	0.2434	1.158
JW1683	B1693	aroD	0.7512	0.7695	0.1754	0.1738	1.3317
JW1694	B1704	aroH	0.8926	0.8745	0.2911	0.2696	0.9638
JW1733	B1744	astE	0.912	0.9033	0.3262	0.3275	0.8492
JW1734	B1745	astB	0.9142	0.9275	0.2362	0.2331	1.2001
JW1736	B1747	astA	0.9636	1.0103	0.263	0.2208	1.2477
JW1750	B1761	gdhA	0.9519	0.9764	0.2961	0.2995	0.9901
JW1789	B1800	yeaU	0.9437	0.9568	0.3345	0.3032	0.9114
JW2001	B2019	hisG	0.9151	0.9202	0.3724	0.3559	0.7706
JW2002	B2020	hisD	0.9575	0.9709	0.2726	0.2224	1.1914
JW2003	B2021	hisC	0.968	0.9668	0.3247	0.3332	0.8993
JW2007	B2025	hisF	0.9618	0.9272	0.3098	0.3487	0.8773
JW2008	B2026	hisI	0.9889	1.0306	0.2865	0.2745	1.1009
JW2028	B2043	wcaM	0.9483	0.9912	0.2225	0.1625	1.5406
JW2029	B2044	wcaL	0.939	0.9534	0.2453	0.2235	1.2345
JW2043	B2058	wcaB	0.9272	0.9476	0.2367	0.2238	1.245
JW2316	B2319	usg	0.7489	0.7883	0.2733	0.2672	0.8697
JW2326	B2329	aroC	0.7976	0.8527	0.1876	0.1544	1.4757
JW2337	B2340	sixA	0.9257	0.9507	0.3377	0.3333	0.8552
JW2370	B2373	yfdU	0.9632	0.9665	0.2986	0.3257	0.9453
JW2407	B2414	cysK	0.9786	0.9922	0.235	0.2406	1.2672
JW2414	B2421	cysM	0.9177	0.9223	0.3386	0.248	0.9592
JW2535	B2551	glyA	0.857	0.862	0.3228	0.2652	0.894
JW2537	B2553	glnB	0.9371	0.9467	0.2896	0.2777	1.0155
JW2580	B2599	pheA	0.9352	0.9427	0.3223	0.257	0.9913
JW2581	B2600	tyrA	0.9464	0.9658	0.2571	0.2809	1.0869
JW2582	B2601	aroF	0.8667	0.9154	0.2472	0.2302	1.1416
JW2786	B2818	argA	0.9551	0.9723	0.3474	0.3785	0.812
JW2806	B2838	lysA	0.9762	1.0054	0.3527	0.2943	0.9366
JW2839	B2871	ygeX	0.9571	0.9601	0.3401	0.2608	0.9757
JW2880	B2913	serA	0.9058	0.9058	0.3034	0.2691	0.9677
JW2975	B3008	metC	0.8173	0.8263	0.266	0.2316	1.0101
JW3194	B3225	nanA	0.8086	0.8001	0.2864	0.2155	0.9802
JW3242	B3281	aroE	0.7551	0.7623	0.1822	0.1668	1.3296
[truncated: 2,323 more rows]
