# Supplementary material for: Discovery of a small molecule that inhibits bacterial ribosome biogenesis
Source: eLife. 2014 Sep 18;3:e03574. doi: 10.7554/eLife.03574 (PMC4371806; doi:10.7554/eLife.03574)
Supplement: Figure 2—source data 1. — OD values were normalized across screening plates to account for plate-to-plate variations. DOI: http://dx.doi.org/10.7554/eLife.03574.007 [file elife03574s002.xlsx]

## Sheet: Figure 2 - source data 1
Figure 2 - source data 1. Small molecule screen for cold senstivity.
OD values were normalized across screening plates to account for plate-to-plate variations.
Plate	Well	37-R1	37-R2	15-R1	15-R2	Norm 37	Norm 15	Vendor	Cat #	MAC ID
1	A2	0.59	0.591	0.243	0.246	0.634328	0.254819	Maybridge	AC 10608	MAC-0152106
1	A3	0.578	0.597	0.24	0.246	0.631328	0.253319	Maybridge	AC 18836	MAC-0152114
1	A4	0.576	0.581	0.231	0.235	0.622328	0.243319	Maybridge	AC 35494	MAC-0152122
1	A5	0.593	0.596	0.226	0.23	0.638328	0.238319	Maybridge	AW 00029	MAC-0001002
1	A6	0.581	0.596	0.233	0.238	0.632328	0.245819	Maybridge	AW 00181	MAC-0001040
1	A7	0.592	0.595	0.242	0.232	0.637328	0.247319	Maybridge	AW 00231	MAC-0001063
1	A8	0.585	0.594	0.233	0.224	0.633328	0.238819	Maybridge	AW 00298	MAC-0001095
1	A9	0.59	0.596	0.245	0.233	0.636828	0.249319	Maybridge	AW 00354	MAC-0001124
1	A10	0.591	0.597	0.267	0.239	0.637828	0.263319	Maybridge	AW 00388	MAC-0001146
1	A11	0.599	0.62	0.265	0.24	0.653328	0.262819	Maybridge	AW 00425	MAC-0001173
1	B2	0.586	0.58	0.253	0.251	0.626828	0.262319	Maybridge	AC 12028	MAC-0168100
1	B3	0.59	0.585	0.253	0.249	0.631328	0.261319	Maybridge	AC 27191	MAC-0152115
1	B4	0.577	0.58	0.253	0.247	0.622328	0.260319	Maybridge	AC 35726	MAC-0152123
1	B5	0.576	0.565	0.255	0.239	0.614328	0.257319	Maybridge	AW 00098	MAC-0001008
1	B6	0.589	0.592	0.265	0.243	0.634328	0.264319	Maybridge	AW 00196	MAC-0152139
1	B7	0.58	0.571	0.255	0.244	0.619328	0.259819	Maybridge	AW 00238	MAC-0001067
1	B8	0.595	0.577	0.261	0.239	0.629828	0.260319	Maybridge	AW 00304	MAC-0001097
1	B9	0.587	0.578	0.254	0.23	0.626328	0.252319	Maybridge	AW 00361	MAC-0001127
1	B10	0.599	0.59	0.255	0.225	0.638328	0.250319	Maybridge	AW 00396	MAC-0001152
1	B11	0.601	0.581	0.263	0.239	0.634828	0.261319	Maybridge	AW 00432	MAC-0001178
1	C2	0.573	0.57	0.253	0.246	0.615328	0.259819	Maybridge	AC 12308	MAC-0152108
1	C3	0.568	0.575	0.253	0.25	0.615328	0.261819	Maybridge	AC 27651	MAC-0152116
1	C4	0.565	0.57	0.248	0.242	0.611328	0.255319	Maybridge	AC 36050	MAC-0152124
1	C5	0.551	0.566	0.247	0.234	0.602328	0.250819	Maybridge	AW 00118	MAC-0001018
1	C6	0.54	0.544	0.256	0.23	0.585828	0.253319	Maybridge	AW 00201	MAC-0001048
1	C7	0.536	0.56	0.235	0.236	0.591828	0.245819	Maybridge	AW 00242	MAC-0001070
1	C8	0.553	0.557	0.244	0.22	0.598828	0.242319	Maybridge	AW 00305	MAC-0001098
1	C9	0.567	0.571	0.249	0.228	0.612828	0.248819	Maybridge	AW 00362	MAC-0001128
1	C10	0.583	0.586	0.244	0.236	0.628328	0.250319	Maybridge	AW 00397	MAC-0001153
1	C11	0.602	0.592	0.226	0.225	0.640828	0.235819	Maybridge	AW 00435	MAC-0001181
1	D2	0.573	0.562	0.251	0.238	0.611328	0.254819	Maybridge	AC 12605	MAC-0152109
1	D3	0.549	0.571	0.252	0.246	0.603828	0.259319	Maybridge	AC 29083	MAC-0152117
1	D4	0.563	0.574	0.257	0.246	0.612328	0.261819	Maybridge	AC 36062	MAC-0152125
1	D5	0.548	0.562	0.249	0.243	0.598828	0.256319	Maybridge	AW 00136	MAC-0001024
1	D6	0.561	0.573	0.253	0.245	0.610828	0.259319	Maybridge	AW 00203	MAC-0001049
1	D7	0.568	0.569	0.27	0.228	0.612328	0.259319	Maybridge	AW 00252	MAC-0001075
1	D8	0.558	0.577	0.248	0.222	0.611328	0.245319	Maybridge	AW 00322	MAC-0001110
1	D9	0.559	0.561	0.229	0.21	0.603828	0.229819	Maybridge	AW 00367	MAC-0001130
1	D10	0.582	0.572	0.229	0.221	0.620828	0.235319	Maybridge	AW 00398	MAC-0001154
1	D11	0.608	0.594	0.206	0.219	0.644828	0.222819	Maybridge	AW 00439	MAC-0001184
1	E2	0.534	0.561	0.218	0.215	0.591328	0.226819	Maybridge	AC 12926	MAC-0152110
1	E3	0.536	0.548	0.234	0.23	0.585828	0.242319	Maybridge	AC 29726	MAC-0152118
1	E4	0.486	0.514	0.24	0.243	0.543828	0.251819	Maybridge	AC 40197	MAC-0152126
1	E5	0.528	0.545	0.249	0.232	0.580328	0.250819	Maybridge	AW 00142	MAC-0001029
1	E6	0.545	0.535	0.24	0.239	0.583828	0.249819	Maybridge	AW 00211	MAC-0001051
1	E7	0.563	0.562	0.255	0.225	0.606328	0.250319	Maybridge	AW 00257	MAC-0001079
1	E8	0.556	0.552	0.245	0.204	0.597828	0.234819	Maybridge	AW 00323	MAC-0001111
1	E9	0.583	0.567	0.235	0.193	0.618828	0.224319	Maybridge	AW 00374	MAC-0001133
1	E10	0.57	0.563	0.215	0.202	0.610328	0.218819	Maybridge	AW 00399	MAC-0001155
1	E11	0.579	0.598	0.244	0.22	0.632328	0.242319	Maybridge	AW 00453	MAC-0001194
1	F2	0.56	0.584	0.236	0.228	0.615828	0.242319	Maybridge	AC 13696	MAC-0152111
1	F3	0.545	0.562	0.241	0.226	0.597328	0.243819	Maybridge	AC 29790	MAC-0152119
1	F4	0.561	0.543	0.25	0.227	0.595828	0.248819	Maybridge	AC 42043	MAC-0152127
1	F5	0.544	0.551	0.231	0.23	0.591328	0.240819	Maybridge	AW 00143	MAC-0001030
1	F6	0.559	0.559	0.241	0.219	0.602828	0.240319	Maybridge	AW 00213	MAC-0001052
1	F7	0.561	0.566	0.244	0.206	0.607328	0.235319	Maybridge	AW 00265	MAC-0001083
1	F8	0.564	0.575	0.233	0.2	0.613328	0.226819	Maybridge	AW 00342	MAC-0001122
1	F9	0.558	0.571	0.235	0.204	0.608328	0.229819	Maybridge	AW 00378	MAC-0001137
1	F10	0.566	0.567	0.238	0.231	0.610328	0.244819	Maybridge	AW 00404	MAC-0001157
1	F11	0.598	0.582	0.255	0.26	0.633828	0.267819	Maybridge	AW 00455	MAC-0001196
1	G2	0.569	0.57	0.216	0.224	0.613328	0.230319	Maybridge	AC 13917	MAC-0152112
1	G3	0.537	0.516	0.21	0.215	0.570328	0.222819	Maybridge	AC 33318	MAC-0152120
1	G4	0.561	0.566	0.218	0.228	0.607328	0.233319	Maybridge	AC 42061	MAC-0152128
1	G5	0.561	0.563	0.22	0.206	0.605828	0.223319	Maybridge	AW 00155	MAC-0001031
1	G6	0.571	0.559	0.233	0.227	0.608828	0.240319	Maybridge	AW 00215	MAC-0001053
1	G7	0.569	0.565	0.25	0.222	0.610828	0.246319	Maybridge	AW 00281	MAC-0001086
1	G8	0.575	0.571	0.249	0.193	0.616828	0.231319	Maybridge	AW 00343	MAC-0001123
1	G9	0.572	0.57	0.224	0.222	0.614828	0.233319	Maybridge	AW 00381	MAC-0001140
1	G10	0.586	0.588	0.234	0.202	0.630828	0.228319	Maybridge	AW 00405	MAC-0001158
1	G11	0.587	0.586	0.218	0.225	0.630328	0.231819	Maybridge	AW 00459	MAC-0001200
1	H2	0.619	0.618	0.227	0.235	0.662328	0.241319	Maybridge	AC 18635	MAC-0152113
1	H3	0.618	0.61	0.229	0.231	0.657828	0.240319	Maybridge	AC 33706	MAC-0152121
1	H4	0.602	0.59	0.251	0.234	0.639828	0.252819	Maybridge	AW 00005	MAC-0001001
1	H5	0.601	0.58	0.251	0.221	0.634328	0.246319	Maybridge	AW 00169	MAC-0001033
1	H6	0.633	0.614	0.256	0.231	0.667328	0.253819	Maybridge	AW 00230	MAC-0001062
1	H7	0.626	0.616	0.242	0.208	0.664828	0.235319	Maybridge	AW 00283	MAC-0001087
1	H8	0.619	0.601	0.257	0.223	0.653828	0.250319	Maybridge	AW 00350	MAC-0152161
1	H9	0.621	0.606	0.242	0.223	0.657328	0.242819	Maybridge	AW 00387	MAC-0001145
1	H10	0.638	0.63	0.251	0.232	0.677828	0.251819	Maybridge	AW 00424	MAC-0001172
1	H11	0.64	0.636	0.247	0.226	0.681828	0.246819	Maybridge	AW 00473	MAC-0001210
2	A2	0.593	0.647	0.246	0.243	0.639666	0.245657	Maybridge	AW 00474	MAC-0001211
2	A3	0.592	0.634	0.248	0.244	0.632666	0.247157	Maybridge	AW 00510	MAC-0001240
2	A4	0.591	0.6	0.244	0.241	0.615166	0.243657	Maybridge	AW 00552	MAC-0001263
2	A5	0.597	0.62	0.249	0.253	0.628166	0.252157	Maybridge	AW 00607	MAC-0001309
2	A6	0.594	0.588	0.25	0.254	0.610666	0.253157	Maybridge	AW 00650	MAC-0001347
2	A7	0.607	0.61	0.243	0.252	0.628166	0.248657	Maybridge	AW 00690	MAC-0001372
2	A8	0.59	0.59	0.236	0.248	0.609666	0.243157	Maybridge	AW 00715	MAC-0001393
2	A9	0.593	0.595	0.245	0.252	0.613666	0.249657	Maybridge	AW 00736	MAC-0001407
2	A10	0.604	0.583	0.251	0.254	0.613166	0.253657	Maybridge	AW 00768	MAC-0001429
2	A11	0.606	0.606	0.257	0.263	0.625666	0.261157	Maybridge	AW 00805	MAC-0001459
2	B2	0.611	0.616	0.26	0.252	0.633166	0.257157	Maybridge	AW 00477	MAC-0001214
2	B3	0.608	0.62	0.259	0.255	0.633666	0.258157	Maybridge	AW 00524	MAC-0001246
2	B4	0.612	0.609	0.261	0.259	0.630166	0.261157	Maybridge	AW 00554	MAC-0001265
2	B5	0.604	0.609	0.259	0.255	0.626166	0.258157	Maybridge	AW 00609	MAC-0001311
2	B6	0.615	0.565	0.263	0.259	0.609666	0.262157	Maybridge	AW 00651	MAC-0001348
2	B7	0.604	0.583	0.258	0.258	0.613166	0.259157	Maybridge	AW 00694	MAC-0001376
2	B8	0.596	0.55	0.26	0.264	0.592666	0.263157	Maybridge	AW 00717	MAC-0001394
2	B9	0.603	0.554	0.251	0.248	0.598166	0.250657	Maybridge	AW 00737	MAC-0001408
2	B10	0.611	0.561	0.257	0.255	0.605666	0.257157	Maybridge	AW 00769	MAC-0001430
2	B11	0.611	0.583	0.255	0.245	0.616666	0.251157	Maybridge	AW 00809	MAC-0001462
2	C2	0.609	0.606	0.249	0.246	0.627166	0.248657	Maybridge	AW 00486	MAC-0001222
2	C3	0.606	0.619	0.256	0.257	0.632166	0.257657	Maybridge	AW 00533	MAC-0001250
2	C4	0.594	0.559	0.253	0.249	0.596166	0.252157	Maybridge	AW 00555	MAC-0001266
2	C5	0.598	0.606	0.254	0.255	0.621666	0.255657	Maybridge	AW 00610	MAC-0001312
2	C6	0.607	0.601	0.253	0.246	0.623666	0.250657	Maybridge	AW 00653	MAC-0001350
2	C7	0.594	0.582	0.249	0.252	0.607666	0.251657	Maybridge	AW 00695	MAC-0001377
2	C8	0.59	0.579	0.247	0.238	0.604166	0.243657	Maybridge	AW 00718	MAC-0000003
2	C9	0.597	0.546	0.25	0.249	0.591166	0.250657	Maybridge	AW 00742	MAC-0001411
2	C10	0.591	0.546	0.243	0.24	0.588166	0.242657	Maybridge	AW 00785	MAC-0001442
2	C11	0.611	0.549	0.251	0.247	0.599666	0.250157	Maybridge	AW 00810	MAC-0001463
2	D2	0.619	0.622	0.247	0.245	0.640166	0.247157	Maybridge	AW 00489	MAC-0001225
2	D3	0.603	0.61	0.251	0.247	0.626166	0.250157	Maybridge	AW 00540	MAC-0001254
2	D4	0.615	0.623	0.256	0.251	0.638666	0.254657	Maybridge	AW 00558	MAC-0001269
2	D5	0.593	0.601	0.251	0.247	0.616666	0.250157	Maybridge	AW 00613	MAC-0001315
2	D6	0.618	0.627	0.265	0.259	0.642166	0.263157	Maybridge	AW 00654	MAC-0001351
2	D7	0.603	0.607	0.258	0.257	0.624666	0.258657	Maybridge	AW 00698	MAC-0001380
2	D8	0.594	0.636	0.249	0.248	0.634666	0.249657	Maybridge	AW 00720	MAC-0001397
2	D9	0.6	0.541	0.237	0.239	0.590166	0.239157	Maybridge	AW 00745	MAC-0001414
2	D10	0.597	0.54	0.24	0.234	0.588166	0.238157	Maybridge	AW 00788	MAC-0001445
2	D11	0.614	0.57	0.251	0.237	0.611666	0.245157	Maybridge	AW 00811	MAC-0001464
2	E2	0.607	0.622	0.239	0.236	0.634166	0.238657	Maybridge	AW 00497	MAC-0001232
2	E3	0.602	0.596	0.246	0.241	0.618666	0.244657	Maybridge	AW 00543	MAC-0001257
2	E4	0.58	0.599	0.234	0.239	0.609166	0.237657	Maybridge	AW 00562	MAC-0001272
2	E5	0.579	0.602	0.249	0.24	0.610166	0.245657	Maybridge	AW 00620	MAC-0001320
2	E6	0.592	0.592	0.254	0.242	0.611666	0.249157	Maybridge	AW 00670	MAC-0001358
2	E7	0.609	0.545	0.246	0.234	0.596666	0.241157	Maybridge	AW 00701	MAC-0001383
2	E8	0.601	0.574	0.246	0.239	0.607166	0.243657	Maybridge	AW 00725	MAC-0001400
2	E9	0.607	0.544	0.235	0.231	0.595166	0.234157	Maybridge	AW 00749	MAC-0001416
2	E10	0.607	0.527	0.242	0.236	0.586666	0.240157	Maybridge	AW 00789	MAC-0001446
2	E11	0.615	0.543	0.245	0.245	0.598666	0.246157	Maybridge	AW 00813	MAC-0000006
2	F2	0.617	0.617	0.235	0.237	0.636666	0.237157	Maybridge	AW 00498	MAC-0152191
2	F3	0.612	0.604	0.243	0.233	0.627666	0.239157	Maybridge	AW 00545	MAC-0001258
2	F4	0.613	0.61	0.249	0.238	0.631166	0.244657	Maybridge	AW 00587	MAC-0001291
2	F5	0.602	0.62	0.243	0.24	0.630666	0.242657	Maybridge	AW 00631	MAC-0001331
2	F6	0.61	0.62	0.254	0.253	0.634666	0.254657	Maybridge	AW 00672	MAC-0001359
2	F7	0.605	0.563	0.24	0.232	0.603666	0.237157	Maybridge	AW 00706	MAC-0001387
2	F8	0.608	0.616	0.252	0.252	0.631666	0.253157	Maybridge	AW 00726	MAC-0001401
2	F9	0.601	0.578	0.249	0.238	0.609166	0.244657	Maybridge	AW 00750	MAC-0001417
2	F10	0.605	0.578	0.244	0.249	0.611166	0.247657	Maybridge	AW 00793	MAC-0001448
2	F11	0.612	0.57	0.246	0.252	0.610666	0.250157	Maybridge	AW 00817	MAC-0001470
2	G2	0.604	0.623	0.228	0.243	0.633166	0.236657	Maybridge	AW 00499	MAC-0152192
2	G3	0.605	0.609	0.227	0.241	0.626666	0.235157	Maybridge	AW 00547	MAC-0152200
2	G4	0.6	0.567	0.232	0.235	0.603166	0.234657	Maybridge	AW 00591	MAC-0152208
2	G5	0.608	0.607	0.238	0.229	0.627166	0.234657	Maybridge	AW 00632	MAC-0001332
2	G6	0.617	0.597	0.235	0.226	0.626666	0.231657	Maybridge	AW 00676	MAC-0001362
2	G7	0.612	0.573	0.246	0.239	0.612166	0.243657	Maybridge	AW 00707	MAC-0001388
2	G8	0.613	0.555	0.237	0.228	0.603666	0.233657	Maybridge	AW 00734	MAC-0001405
2	G9	0.597	0.558	0.227	0.223	0.597166	0.226157	Maybridge	AW 00758	MAC-0001423
2	G10	0.613	0.563	0.241	0.244	0.607666	0.243657	Maybridge	AW 00794	MAC-0001449
2	G11	0.594	0.54	0.234	0.207	0.586666	0.221657	Maybridge	AW 00819	MAC-0001472
2	H2	0.622	0.661	0.247	0.248	0.661166	0.248657	Maybridge	AW 00508	MAC-0001239
2	H3	0.604	0.658	0.233	0.242	0.650666	0.238657	Maybridge	AW 00549	MAC-0001260
2	H4	0.611	0.612	0.251	0.239	0.631166	0.246157	Maybridge	AW 00605	MAC-0001307
2	H5	0.614	0.611	0.238	0.236	0.632166	0.238157	Maybridge	AW 00633	MAC-0001333
2	H6	0.622	0.606	0.266	0.228	0.633666	0.248157	Maybridge	AW 00682	MAC-0001366
2	H7	0.624	0.606	0.257	0.26	0.634666	0.259657	Maybridge	AW 00709	MAC-0001390
2	H8	0.611	0.581	0.25	0.252	0.615666	0.252157	Maybridge	AW 00735	MAC-0001406
2	H9	0.622	0.602	0.257	0.262	0.631666	0.260657	Maybridge	AW 00761	MAC-0001425
2	H10	0.636	0.594	0.257	0.258	0.634666	0.258657	Maybridge	AW 00800	MAC-0001454
2	H11	0.619	0.584	0.255	0.257	0.621166	0.257157	Maybridge	AW 00821	MAC-0001473
3	A2	0.583	0.59	0.245	0.243	0.616791	0.283757	Maybridge	AW 00823	MAC-0001475
3	A3	0.621	0.592	0.239	0.236	0.636791	0.277257	Maybridge	AW 00844	MAC-0001493
3	A4	0.58	0.586	0.233	0.235	0.613291	0.273757	Maybridge	AW 00869	MAC-0001512
3	A5	0.594	0.596	0.236	0.229	0.625291	0.272257	Maybridge	AW 00887	MAC-0001525
3	A6	0.585	0.588	0.237	0.229	0.616791	0.272757	Maybridge	AW 00901	MAC-0001533
3	A7	0.587	0.591	0.237	0.225	0.619291	0.270757	Maybridge	AW 00932	MAC-0001551
3	A8	0.583	0.583	0.233	0.216	0.613291	0.264257	Maybridge	AW 00976	MAC-0001587
3	A9	0.584	0.588	0.239	0.216	0.616291	0.267257	Maybridge	AW 01023	MAC-0001629
3	A10	0.584	0.588	0.239	0.211	0.616291	0.264757	Maybridge	AW 01057	MAC-0001662
3	A11	0.588	0.6	0.198	0.221	0.624291	0.249257	Maybridge	AW 01126	MAC-0001719
3	B2	0.64	0.588	0.258	0.254	0.644291	0.295757	Maybridge	AW 00829	MAC-0001478
3	B3	0.646	0.619	0.257	0.243	0.662791	0.289757	Maybridge	AW 00845	MAC-0001494
3	B4	0.586	0.587	0.254	0.244	0.616791	0.288757	Maybridge	AW 00870	MAC-0001513
3	B5	0.617	0.587	0.256	0.231	0.632291	0.283257	Maybridge	AW 00889	MAC-0001526
3	B6	0.615	0.577	0.25	0.202	0.626291	0.265757	Maybridge	AW 00906	MAC-0000013
3	B7	0.615	0.574	0.244	0.187	0.624791	0.255257	Maybridge	AW 00939	MAC-0001555
3	B8	0.576	0.576	0.244	0.185	0.606291	0.254257	Maybridge	AW 00986	MAC-0001597
3	B9	0.591	0.57	0.236	0.18	0.610791	0.247757	Maybridge	AW 01025	MAC-0001631
3	B10	0.595	0.595	0.216	0.192	0.625291	0.243757	Maybridge	AW 01095	MAC-0001699
3	B11	0.595	0.572	0.184	0.191	0.613791	0.227257	Maybridge	AW 01127	MAC-0001720
3	C2	0.617	0.613	0.258	0.254	0.645291	0.295757	Maybridge	AW 00830	MAC-0000008
3	C3	0.615	0.615	0.252	0.242	0.645291	0.286757	Maybridge	AW 00846	MAC-0001495
3	C4	0.621	0.56	0.251	0.233	0.620791	0.281757	Maybridge	AW 00871	MAC-0001514
3	C5	0.609	0.587	0.248	0.217	0.628291	0.272257	Maybridge	AW 00890	MAC-0001527
3	C6	0.592	0.579	0.244	0.198	0.615791	0.260757	Maybridge	AW 00907	MAC-0001535
3	C7	0.588	0.585	0.23	0.184	0.616791	0.246757	Maybridge	AW 00943	MAC-0001556
3	C8	0.566	0.539	0.232	0.178	0.582791	0.244757	Maybridge	AW 01004	MAC-0001612
3	C9	0.568	0.558	0.213	0.181	0.593291	0.236757	Maybridge	AW 01026	MAC-0001632
3	C10	0.571	0.584	0.183	0.184	0.607791	0.223257	Maybridge	AW 01101	MAC-0001702
3	C11	0.579	0.57	0.172	0.179	0.604791	0.215257	Maybridge	AW 01144	MAC-0001733
3	D2	0.625	0.616	0.246	0.236	0.650791	0.280757	Maybridge	AW 00832	MAC-0001481
3	D3	0.611	0.609	0.248	0.23	0.640291	0.278757	Maybridge	AW 00849	MAC-0001498
3	D4	0.606	0.596	0.255	0.226	0.631291	0.280257	Maybridge	AW 00873	MAC-0001515
3	D5	0.617	0.597	0.241	0.202	0.637291	0.261257	Maybridge	AW 00891	MAC-0001528
3	D6	0.619	0.596	0.233	0.185	0.637791	0.248757	Maybridge	AW 00910	MAC-0001537
3	D7	0.542	0.545	0.239	0.175	0.573791	0.246757	Maybridge	AW 00944	MAC-0001557
3	D8	0.621	0.614	0.226	0.176	0.647791	0.240757	Maybridge	AW 01009	MAC-0001616
3	D9	0.555	0.569	0.201	0.17	0.592291	0.225257	Maybridge	AW 01028	MAC-0001634
3	D10	0.604	0.568	0.171	0.18	0.616291	0.215257	Maybridge	AW 01108	MAC-0001709
3	D11	0.575	0.587	0.19	0.181	0.611291	0.225257	Maybridge	AW 01152	MAC-0001740
3	E2	0.608	0.614	0.237	0.219	0.641291	0.267757	Maybridge	AW 00833	MAC-0001482
3	E3	0.606	0.593	0.241	0.22	0.629791	0.270257	Maybridge	AW 00850	MAC-0001499
3	E4	0.577	0.57	0.23	0.206	0.603791	0.257757	Maybridge	AW 00875	MAC-0001516
3	E5	0.586	0.571	0.245	0.202	0.608791	0.263257	Maybridge	AW 00895	MAC-0001529
3	E6	0.588	0.574	0.229	0.176	0.611291	0.242257	Maybridge	AW 00911	MAC-0001538
3	E7	0.613	0.576	0.232	0.173	0.624791	0.242257	Maybridge	AW 00950	MAC-0001563
3	E8	0.582	0.557	0.196	0.173	0.599791	0.224257	Maybridge	AW 01010	MAC-0001617
3	E9	0.562	0.554	0.215	0.177	0.588291	0.235757	Maybridge	AW 01029	MAC-0001635
3	E10	0.561	0.563	0.181	0.182	0.592291	0.221257	Maybridge	AW 01111	MAC-0001712
3	E11	0.567	0.572	0.172	0.19	0.599791	0.220757	Maybridge	AW 01163	MAC-0001750
3	F2	0.619	0.599	0.222	0.209	0.639291	0.255257	Maybridge	AW 00837	MAC-0001486
3	F3	0.614	0.608	0.231	0.207	0.641291	0.258757	Maybridge	AW 00852	MAC-0001500
3	F4	0.609	0.569	0.23	0.194	0.619291	0.251757	Maybridge	AW 00876	MAC-0001517
3	F5	0.604	0.59	0.219	0.183	0.627291	0.240757	Maybridge	AW 00896	MAC-0001530
3	F6	0.593	0.575	0.228	0.171	0.614291	0.239257	Maybridge	AW 00919	MAC-0001544
3	F7	0.607	0.589	0.216	0.176	0.628291	0.235757	Maybridge	AW 00954	MAC-0001567
3	F8	0.588	0.55	0.209	0.168	0.599291	0.228257	Maybridge	AW 01012	MAC-0001619
3	F9	0.565	0.571	0.184	0.173	0.598291	0.218257	Maybridge	AW 01034	MAC-0001640
3	F10	0.551	0.576	0.167	0.177	0.593791	0.211757	Maybridge	AW 01112	MAC-0001713
3	F11	0.573	0.573	0.184	0.175	0.603291	0.219257	Maybridge	AW 01169	MAC-0001754
3	G2	0.603	0.571	0.224	0.183	0.617291	0.243257	Maybridge	AW 00838	MAC-0001487
3	G3	0.574	0.557	0.219	0.197	0.595791	0.247757	Maybridge	AW 00863	MAC-0001507
3	G4	0.589	0.547	0.221	0.206	0.598291	0.253257	Maybridge	AW 00880	MAC-0001520
3	G5	0.617	0.561	0.239	0.185	0.619291	0.251757	Maybridge	AW 00897	MAC-0000012
3	G6	0.603	0.563	0.23	0.177	0.613291	0.243257	Maybridge	AW 00921	MAC-0001546
3	G7	0.603	0.568	0.209	0.178	0.615791	0.233257	Maybridge	AW 00957	MAC-0000016
3	G8	0.565	0.573	0.214	0.174	0.599291	0.233757	Maybridge	AW 01018	MAC-0000021
3	G9	0.559	0.568	0.183	0.171	0.593791	0.216757	Maybridge	AW 01048	MAC-0001654
3	G10	0.543	0.577	0.171	0.18	0.590291	0.215257	Maybridge	AW 01119	MAC-0001716
3	G11	0.565	0.565	0.165	0.176	0.595291	0.210257	Maybridge	AW 01171	MAC-0001756
3	H2	0.621	0.597	0.234	0.197	0.639291	0.255257	Maybridge	AW 00839	MAC-0001488
3	H3	0.601	0.591	0.242	0.189	0.626291	0.255257	Maybridge	AW 00865	MAC-0001508
3	H4	0.623	0.596	0.254	0.209	0.639791	0.271257	Maybridge	AW 00881	MAC-0001521
3	H5	0.639	0.591	0.243	0.194	0.645291	0.258257	Maybridge	AW 00898	MAC-0001532
3	H6	0.617	0.607	0.246	0.195	0.642291	0.260257	Maybridge	AW 00925	MAC-0000014
3	H7	0.604	0.599	0.235	0.182	0.631791	0.248257	Maybridge	AW 00959	MAC-0001571
3	H8	0.581	0.607	0.225	0.176	0.624291	0.240257	Maybridge	AW 01021	MAC-0001627
3	H9	0.586	0.601	0.194	0.182	0.623791	0.227757	Maybridge	AW 01052	MAC-0001657
3	H10	0.604	0.648	0.178	0.188	0.656291	0.222757	Maybridge	AW 01120	MAC-0001717
3	H11	0.605	0.624	0.19	0.187	0.644791	0.228257	Maybridge	AW 01172	MAC-0001757
4	A2	0.602	0.6	0.28	0.243	0.642478	0.251757	Maybridge	AW 01178	MAC-0001761
4	A3	0.597	0.591	0.292	0.232	0.635478	0.252257	Maybridge	AW 01196	MAC-0001776
4	A4	0.6	0.593	0.264	0.229	0.637978	0.236757	Maybridge	AW 01228	MAC-0001802
4	A5	0.587	0.575	0.267	0.226	0.622478	0.236757	Maybridge	AW 01275	MAC-0001822
4	A6	0.589	0.587	0.275	0.231	0.629478	0.243257	Maybridge	BLT 00208	MAC-0152378
4	A7	0.598	0.59	0.288	0.224	0.635478	0.246257	Maybridge	BR 00046	MAC-0001901
4	A8	0.587	0.579	0.226	0.209	0.624478	0.207757	Maybridge	BR 00082	MAC-0001918
4	A9	0.591	0.592	0.249	0.251	0.632978	0.240257	Maybridge	BTB 00183	MAC-0001958
4	A10	0.616	0.607	0.262	0.251	0.652978	0.246757	Maybridge	BTB 00340	MAC-0002005
4	A11	0.626	0.61	0.293	0.252	0.659478	0.262757	Maybridge	BTB 00383	MAC-0002020
4	B2	0.582	0.597	0.203	0.271	0.630978	0.227257	Maybridge	AW 01180	MAC-0152347
4	B3	0.585	0.593	0.193	0.273	0.630478	0.223257	Maybridge	AW 01199	MAC-0001778
4	B4	0.579	0.588	0.219	0.269	0.624978	0.234257	Maybridge	AW 01230	MAC-0001803
4	B5	0.587	0.592	0.214	0.267	0.630978	0.230757	Maybridge	BLT 00007	MAC-0001824
4	B6	0.572	0.584	0.213	0.259	0.619478	0.226257	Maybridge	BLT 00214	MAC-0001866
4	B7	0.575	0.589	0.226	0.26	0.623478	0.233257	Maybridge	BR 00054	MAC-0001905
4	B8	0.574	0.593	0.198	0.285	0.624978	0.231757	Maybridge	BR 00126	MAC-0001926
4	B9	0.577	0.587	0.25	0.291	0.623478	0.260757	Maybridge	BTB 00187	MAC-0001961
4	B10	0.593	0.594	0.243	0.297	0.634978	0.260257	Maybridge	BTB 00356	MAC-0002007
4	B11	0.59	0.591	0.237	0.25	0.631978	0.233757	Maybridge	BTB 00388	MAC-0002022
4	C2	0.565	0.583	0.187	0.304	0.615478	0.235757	Maybridge	AW 01181	MAC-0001763
4	C3	0.586	0.574	0.199	0.308	0.621478	0.243757	Maybridge	AW 01204	MAC-0001781
4	C4	0.563	0.565	0.201	0.312	0.605478	0.246757	Maybridge	AW 01249	MAC-0152364
4	C5	0.575	0.558	0.209	0.309	0.607978	0.249257	Maybridge	BLT 00022	MAC-0001833
4	C6	0.555	0.565	0.213	0.31	0.601478	0.251757	Maybridge	BLT 00231	MAC-0001871
4	C7	0.57	0.581	0.222	0.308	0.616978	0.255257	Maybridge	BR 00064	MAC-0001906
4	C8	0.558	0.568	0.212	0.307	0.604478	0.249757	Maybridge	BTB 00034	MAC-0001939
4	C9	0.562	0.57	0.182	0.312	0.607478	0.237257	Maybridge	BTB 00229	MAC-0001971
4	C10	0.574	0.595	0.171	0.311	0.625978	0.231257	Maybridge	BTB 00364	MAC-0002012
4	C11	0.583	0.598	0.213	0.289	0.631978	0.241257	Maybridge	BTB 00391	MAC-0002025
4	D2	0.569	0.585	0.2	0.304	0.618478	0.242257	Maybridge	AW 01182	MAC-0001764
4	D3	0.561	0.566	0.196	0.318	0.604978	0.247257	Maybridge	AW 01205	MAC-0001782
4	D4	0.585	0.556	0.196	0.323	0.611978	0.249757	Maybridge	AW 01254	MAC-0001810
4	D5	0.586	0.548	0.225	0.32	0.608478	0.262757	Maybridge	BLT 00075	MAC-0001841
4	D6	0.53	0.527	0.233	0.312	0.569978	0.262757	Maybridge	BLT 00256	MAC-0001874
4	D7	0.582	0.575	0.171	0.289	0.619978	0.220257	Maybridge	BR 00067	MAC-0001907
4	D8	0.591	0.557	0.201	0.314	0.615478	0.247757	Maybridge	BTB 00042	MAC-0001943
4	D9	0.56	0.546	0.183	0.316	0.594478	0.239757	Maybridge	BTB 00244	MAC-0001981
4	D10	0.567	0.559	0.187	0.321	0.604478	0.244257	Maybridge	BTB 00365	MAC-0002013
4	D11	0.585	0.6	0.236	0.285	0.633978	0.250757	Maybridge	BTB 00416	MAC-0002030
4	E2	0.588	0.569	0.196	0.307	0.619978	0.241757	Maybridge	AW 01183	MAC-0001765
4	E3	0.58	0.54	0.212	0.318	0.601478	0.255257	Maybridge	AW 01214	MAC-0001788
4	E4	0.543	0.518	0.219	0.314	0.571978	0.256757	Maybridge	AW 01257	MAC-0001812
4	E5	0.577	0.544	0.223	0.316	0.601978	0.259757	Maybridge	BLT 00077	MAC-0001842
4	E6	0.575	0.54	0.212	0.32	0.598978	0.256257	Maybridge	BLT 00259	MAC-0001875
4	E7	0.587	0.575	0.168	0.287	0.622478	0.217757	Maybridge	BR 00068	MAC-0001908
4	E8	0.552	0.547	0.184	0.315	0.590978	0.239757	Maybridge	BTB 00070	MAC-0001947
4	E9	0.551	0.562	0.169	0.324	0.597978	0.236757	Maybridge	BTB 00246	MAC-0001983
4	E10	0.558	0.571	0.178	0.313	0.605978	0.235757	Maybridge	BTB 00376	MAC-0002016
4	E11	0.58	0.583	0.182	0.309	0.622978	0.235757	Maybridge	BTB 00468	MAC-0002043
4	F2	0.578	0.575	0.205	0.307	0.617978	0.246257	Maybridge	AW 01184	MAC-0001766
4	F3	0.573	0.55	0.222	0.31	0.602978	0.256257	Maybridge	AW 01215	MAC-0001789
4	F4	0.549	0.56	0.232	0.317	0.595978	0.264757	Maybridge	AW 01260	MAC-0001815
4	F5	0.572	0.533	0.234	0.321	0.593978	0.267757	Maybridge	BLT 00092	MAC-0001845
4	F6	0.58	0.547	0.237	0.322	0.604978	0.269757	Maybridge	BLT 00268	MAC-0001879
4	F7	0.577	0.529	0.199	0.298	0.594478	0.238757	Maybridge	BR 00070	MAC-0001910
4	F8	0.555	0.555	0.2	0.316	0.596478	0.248257	Maybridge	BTB 00076	MAC-0001948
4	F9	0.564	0.552	0.206	0.304	0.599478	0.245257	Maybridge	BTB 00312	MAC-0001991
4	F10	0.561	0.562	0.202	0.322	0.602978	0.252257	Maybridge	BTB 00378	MAC-0002017
4	F11	0.589	0.592	0.206	0.288	0.631978	0.237257	Maybridge	BTB 00471	MAC-0002045
4	G2	0.582	0.576	0.204	0.305	0.620478	0.244757	Maybridge	AW 01190	MAC-0001771
4	G3	0.549	0.558	0.218	0.29	0.594978	0.244257	Maybridge	AW 01218	MAC-0001792
4	G4	0.562	0.569	0.217	0.313	0.606978	0.255257	Maybridge	AW 01262	MAC-0001817
4	G5	0.602	0.577	0.218	0.319	0.630978	0.258757	Maybridge	BLT 00106	MAC-0001849
4	G6	0.556	0.55	0.223	0.317	0.594478	0.260257	Maybridge	BLT 00271	MAC-0001882
4	G7	0.544	0.55	0.196	0.308	0.588478	0.242257	Maybridge	BR 00071	MAC-0001911
4	G8	0.566	0.574	0.262	0.243	0.611478	0.242757	Maybridge	BTB 00099	MAC-0001953
4	G9	0.566	0.574	0.208	0.296	0.611478	0.242257	Maybridge	BTB 00320	MAC-0001995
4	G10	0.588	0.586	0.196	0.309	0.628478	0.242757	Maybridge	BTB 00380	MAC-0002018
4	G11	0.591	0.59	0.191	0.252	0.631978	0.211757	Maybridge	BTB 00476	MAC-0002048
4	H2	0.614	0.617	0.201	0.249	0.656978	0.215257	Maybridge	AW 01195	MAC-0001775
4	H3	0.593	0.613	0.208	0.256	0.644478	0.222257	Maybridge	AW 01219	MAC-0000030
4	H4	0.596	0.618	0.218	0.266	0.648478	0.232257	Maybridge	AW 01265	MAC-0001818
4	H5	0.598	0.612	0.208	0.262	0.646478	0.225257	Maybridge	BLT 00147	MAC-0000033
4	H6	0.597	0.583	0.181	0.22	0.631478	0.190757	Maybridge	BR 00042	MAC-0001899
4	H7	0.591	0.606	0.189	0.223	0.639978	0.196257	Maybridge	BR 00072	MAC-0001912
4	H8	0.591	0.626	0.191	0.255	0.649978	0.213257	Maybridge	BTB 00115	MAC-0001954
4	H9	0.618	0.617	0.198	0.261	0.658978	0.219757	Maybridge	BTB 00337	MAC-0002003
4	H10	0.615	0.629	0.2	0.268	0.663478	0.224257	Maybridge	BTB 00381	MAC-0002019
4	H11	0.614	0.641	0.16	0.28	0.668978	0.210257	Maybridge	BTB 00493	MAC-0002057
5	A2	0.601	0.603	0.238	0.243	0.639866	0.238007	Maybridge	BTB 00506	MAC-0002062
5	A3	0.592	0.604	0.233	0.237	0.635866	0.232507	Maybridge	BTB 00554	MAC-0000039
5	A4	0.568	0.586	0.227	0.231	0.614866	0.226507	Maybridge	BTB 00625	MAC-0002104
5	A5	0.578	0.59	0.227	0.232	0.621866	0.227007	Maybridge	BTB 00692	MAC-0002127
5	A6	0.588	0.59	0.231	0.233	0.626866	0.229507	Maybridge	BTB 00776	MAC-0002162
5	A7	0.585	0.576	0.229	0.226	0.618366	0.225007	Maybridge	BTB 00807	MAC-0002179
5	A8	0.597	0.609	0.236	0.233	0.640866	0.232007	Maybridge	BTB 00984	MAC-0002253
5	A9	0.602	0.606	0.249	0.246	0.641866	0.245007	Maybridge	BTB 01078	MAC-0002325
5	A10	0.599	0.612	0.26	0.255	0.643366	0.255007	Maybridge	BTB 01155	MAC-0002350
5	A11	0.615	0.622	0.261	0.243	0.656366	0.249507	Maybridge	BTB 01216	MAC-0002389
5	B2	0.604	0.596	0.255	0.259	0.637866	0.254507	Maybridge	BTB 00512	MAC-0000037
5	B3	0.603	0.605	0.257	0.257	0.641866	0.254507	Maybridge	BTB 00560	MAC-0002084
5	B4	0.6	0.593	0.256	0.259	0.634366	0.255007	Maybridge	BTB 00626	MAC-0002105
5	B5	0.597	0.59	0.254	0.257	0.631366	0.253007	Maybridge	BTB 00693	MAC-0002128
5	B6	0.596	0.583	0.254	0.254	0.627366	0.251507	Maybridge	BTB 00778	MAC-0002163
5	B7	0.574	0.582	0.254	0.253	0.615866	0.251007	Maybridge	BTB 00853	MAC-0002198
5	B8	0.587	0.606	0.251	0.258	0.634366	0.252007	Maybridge	BTB 00991	MAC-0002257
5	B9	0.589	0.593	0.245	0.245	0.628866	0.242507	Maybridge	BTB 01080	MAC-0002326
5	B10	0.607	0.601	0.256	0.254	0.641866	0.252507	Maybridge	BTB 01159	MAC-0002351
5	B11	0.595	0.59	0.254	0.252	0.630366	0.250507	Maybridge	BTB 01229	MAC-0002396
5	C2	0.571	0.59	0.243	0.248	0.618366	0.243007	Maybridge	BTB 00523	MAC-0002067
5	C3	0.577	0.581	0.254	0.253	0.616866	0.251007	Maybridge	BTB 00564	MAC-0002087
5	C4	0.576	0.575	0.251	0.253	0.613366	0.249507	Maybridge	BTB 00636	MAC-0000041
5	C5	0.571	0.564	0.252	0.252	0.605366	0.249507	Maybridge	BTB 00701	MAC-0002134
5	C6	0.558	0.573	0.25	0.25	0.603366	0.247507	Maybridge	BTB 00779	MAC-0002164
5	C7	0.566	0.578	0.25	0.255	0.609866	0.250007	Maybridge	BTB 00855	MAC-0002200
5	C8	0.571	0.58	0.253	0.254	0.613366	0.251007	Maybridge	BTB 00999	MAC-0002263
5	C9	0.566	0.581	0.254	0.247	0.611366	0.248007	Maybridge	BTB 01084	MAC-0002329
5	C10	0.602	0.588	0.257	0.249	0.632866	0.250507	Maybridge	BTB 01165	MAC-0002356
5	C11	0.598	0.574	0.25	0.234	0.623866	0.239507	Maybridge	BTB 01252	MAC-0002410
5	D2	0.592	0.591	0.25	0.256	0.629366	0.250507	Maybridge	BTB 00525	MAC-0002068
5	D3	0.562	0.579	0.246	0.252	0.608366	0.246507	Maybridge	BTB 00579	MAC-0002090
5	D4	0.561	0.572	0.255	0.259	0.604366	0.254507	Maybridge	BTB 00637	MAC-0002110
5	D5	0.572	0.555	0.255	0.254	0.601366	0.252007	Maybridge	BTB 00720	MAC-0002137
5	D6	0.562	0.554	0.26	0.257	0.595866	0.256007	Maybridge	BTB 00782	MAC-0152461
5	D7	0.555	0.562	0.259	0.258	0.596366	0.256007	Maybridge	BTB 00856	MAC-0002201
5	D8	0.56	0.565	0.247	0.251	0.600366	0.246507	Maybridge	BTB 01008	MAC-0002266
5	D9	0.561	0.565	0.254	0.249	0.600866	0.249007	Maybridge	BTB 01088	MAC-0002333
5	D10	0.574	0.576	0.261	0.26	0.612866	0.258007	Maybridge	BTB 01175	MAC-0002363
5	D11	0.606	0.587	0.258	0.247	0.634366	0.250007	Maybridge	BTB 01256	MAC-0002413
5	E2	0.58	0.588	0.258	0.248	0.621866	0.250507	Maybridge	BTB 00526	MAC-0002069
5	E3	0.572	0.567	0.244	0.24	0.607366	0.239507	Maybridge	BTB 00582	MAC-0002091
5	E4	0.534	0.562	0.246	0.247	0.585866	0.244007	Maybridge	BTB 00639	MAC-0002111
5	E5	0.533	0.545	0.245	0.244	0.576866	0.242007	Maybridge	BTB 00729	MAC-0002144
5	E6	0.533	0.545	0.248	0.252	0.576866	0.247507	Maybridge	BTB 00784	MAC-0002166
5	E7	0.559	0.546	0.248	0.25	0.590366	0.246507	Maybridge	BTB 00877	MAC-0002216
5	E8	0.543	0.555	0.25	0.247	0.586866	0.246007	Maybridge	BTB 01034	MAC-0002289
5	E9	0.577	0.574	0.242	0.252	0.613366	0.244507	Maybridge	BTB 01090	MAC-0002334
5	E10	0.574	0.563	0.247	0.239	0.606366	0.240507	Maybridge	BTB 01178	MAC-0002366
5	E11	0.591	0.589	0.249	0.238	0.627866	0.241007	Maybridge	BTB 01272	MAC-0002419
5	F2	0.592	0.586	0.24	0.243	0.626866	0.239007	Maybridge	BTB 00534	MAC-0002072
5	F3	0.586	0.585	0.252	0.255	0.623366	0.251007	Maybridge	BTB 00590	MAC-0002095
5	F4	0.529	0.562	0.242	0.252	0.583366	0.244507	Maybridge	BTB 00656	MAC-0002112
5	F5	0.575	0.571	0.245	0.243	0.610866	0.241507	Maybridge	BTB 00740	MAC-0002148
5	F6	0.549	0.574	0.235	0.235	0.599366	0.232507	Maybridge	BTB 00792	MAC-0002169
5	F7	0.549	0.553	0.245	0.244	0.588866	0.242007	Maybridge	BTB 00885	MAC-0002220
5	F8	0.569	0.555	0.244	0.251	0.599866	0.245007	Maybridge	BTB 01035	MAC-0002290
5	F9	0.565	0.548	0.253	0.247	0.594366	0.247507	Maybridge	BTB 01095	MAC-0002339
5	F10	0.578	0.559	0.253	0.244	0.606366	0.246007	Maybridge	BTB 01195	MAC-0002379
5	F11	0.6	0.579	0.253	0.236	0.627366	0.242007	Maybridge	BTB 01278	MAC-0002421
5	G2	0.588	0.572	0.238	0.245	0.617866	0.239007	Maybridge	BTB 00542	MAC-0002076
5	G3	0.579	0.579	0.238	0.228	0.616866	0.230507	Maybridge	BTB 00592	MAC-0002097
5	G4	0.569	0.584	0.236	0.235	0.614366	0.233007	Maybridge	BTB 00660	MAC-0002114
5	G5	0.568	0.577	0.249	0.243	0.610366	0.243507	Maybridge	BTB 00762	MAC-0002155
5	G6	0.552	0.548	0.249	0.247	0.587866	0.245507	Maybridge	BTB 00794	MAC-0002171
5	G7	0.581	0.571	0.245	0.244	0.613866	0.242007	Maybridge	BTB 00938	MAC-0152472
5	G8	0.579	0.576	0.242	0.243	0.615366	0.240007	Maybridge	BTB 01056	MAC-0002309
5	G9	0.579	0.552	0.252	0.238	0.603366	0.242507	Maybridge	BTB 01101	MAC-0002342
5	G10	0.587	0.565	0.244	0.249	0.613866	0.244007	Maybridge	BTB 01204	MAC-0002383
5	G11	0.6	0.578	0.247	0.189	0.626866	0.215507	Maybridge	BTB 01281	MAC-0002423
5	H2	0.608	0.609	0.259	0.256	0.646366	0.255007	Maybridge	BTB 00544	MAC-0002078
5	H3	0.588	0.592	0.26	0.258	0.627866	0.256507	Maybridge	BTB 00598	MAC-0002101
5	H4	0.612	0.608	0.265	0.261	0.647866	0.260507	Maybridge	BTB 00662	MAC-0002116
5	H5	0.623	0.61	0.261	0.251	0.654366	0.253507	Maybridge	BTB 00769	MAC-0002160
5	H6	0.608	0.609	0.256	0.25	0.646366	0.250507	Maybridge	BTB 00801	MAC-0002175
5	H7	0.629	0.626	0.261	0.247	0.665366	0.251507	Maybridge	BTB 00969	MAC-0002242
5	H8	0.622	0.627	0.264	0.257	0.662366	0.258007	Maybridge	BTB 01058	MAC-0000055
5	H9	0.622	0.627	0.254	0.248	0.662366	0.248507	Maybridge	BTB 01126	MAC-0002208
5	H10	0.635	0.629	0.257	0.251	0.669866	0.251507	Maybridge	BTB 01215	MAC-0000058
5	H11	0.631	0.645	0.256	0.249	0.675866	0.250007	Maybridge	BTB 01294	MAC-0002431
6	A2	0.591	0.599	0.245	0.255	0.622678	0.249307	Maybridge	BTB 01297	MAC-0002434
6	A3	0.582	0.593	0.241	0.253	0.615178	0.246307	Maybridge	BTB 01328	MAC-0000354
6	A4	0.579	0.583	0.237	0.252	0.608678	0.243807	Maybridge	BTB 01398	MAC-0002484
6	A5	0.582	0.592	0.236	0.253	0.614678	0.243807	Maybridge	BTB 01467	MAC-0002528
6	A6	0.582	0.59	0.242	0.254	0.613678	0.247307	Maybridge	BTB 01616	MAC-0002582
6	A7	0.587	0.582	0.231	0.249	0.612178	0.239307	Maybridge	BTB 01696	MAC-0002600
6	A8	0.576	0.581	0.221	0.228	0.606178	0.223807	Maybridge	BTB 01742	MAC-0002618
6	A9	0.607	0.596	0.246	0.245	0.629178	0.244807	Maybridge	BTB 01784	MAC-0002636
6	A10	0.616	0.607	0.254	0.235	0.639178	0.243807	Maybridge	BTB 01847	MAC-0002665
6	A11	0.613	0.611	0.253	0.225	0.639678	0.238307	Maybridge	BTB 01895	MAC-0002694
6	B2	0.586	0.615	0.25	0.253	0.628178	0.250807	Maybridge	BTB 01298	MAC-0002435
6	B3	0.582	0.606	0.255	0.258	0.621678	0.255807	Maybridge	BTB 01330	MAC-0002452
6	B4	0.588	0.604	0.257	0.259	0.623678	0.257307	Maybridge	BTB 01399	MAC-0000062
6	B5	0.599	0.611	0.258	0.258	0.632678	0.257307	Maybridge	BTB 01478	MAC-0002535
6	B6	0.584	0.598	0.251	0.251	0.618678	0.250307	Maybridge	BTB 01629	MAC-0002583
6	B7	0.582	0.609	0.254	0.256	0.623178	0.254307	Maybridge	BTB 01702	MAC-0002601
6	B8	0.587	0.613	0.248	0.248	0.627678	0.247307	Maybridge	BTB 01760	MAC-0002624
6	B9	0.597	0.612	0.256	0.247	0.632178	0.250807	Maybridge	BTB 01785	MAC-0002637
6	B10	0.59	0.611	0.258	0.253	0.628178	0.254807	Maybridge	BTB 01850	MAC-0002668
6	B11	0.596	0.603	0.249	0.219	0.627178	0.233307	Maybridge	BTB 01896	MAC-0002695
6	C2	0.564	0.583	0.24	0.238	0.601178	0.238307	Maybridge	BTB 01303	MAC-0002436
6	C3	0.585	0.598	0.251	0.256	0.619178	0.252807	Maybridge	BTB 01331	MAC-0002453
6	C4	0.584	0.603	0.254	0.252	0.621178	0.252307	Maybridge	BTB 01414	MAC-0152524
6	C5	0.567	0.598	0.25	0.249	0.610178	0.248807	Maybridge	BTB 01485	MAC-0002539
6	C6	0.575	0.59	0.243	0.243	0.610178	0.242307	Maybridge	BTB 01633	MAC-0002584
6	C7	0.578	0.605	0.248	0.249	0.619178	0.247807	Maybridge	BTB 01706	MAC-0002603
6	C8	0.567	0.597	0.253	0.244	0.609678	0.247807	Maybridge	BTB 01763	MAC-0002625
6	C9	0.571	0.602	0.247	0.24	0.614178	0.242807	Maybridge	BTB 01788	MAC-0002640
6	C10	0.569	0.605	0.249	0.241	0.614678	0.244307	Maybridge	BTB 01852	MAC-0002670
6	C11	0.579	0.61	0.25	0.245	0.622178	0.246807	Maybridge	BTB 01898	MAC-0002696
6	D2	0.58	0.61	0.258	0.248	0.622678	0.252307	Maybridge	BTB 01310	MAC-0002438
6	D3	0.578	0.604	0.251	0.246	0.618678	0.247807	Maybridge	BTB 01335	MAC-0002454
6	D4	0.581	0.615	0.256	0.248	0.625678	0.251307	Maybridge	BTB 01415	MAC-0002497
6	D5	0.562	0.596	0.255	0.251	0.606678	0.252307	Maybridge	BTB 01488	MAC-0002541
6	D6	0.546	0.586	0.251	0.25	0.593678	0.249807	Maybridge	BTB 01647	MAC-0002586
6	D7	0.559	0.581	0.254	0.252	0.597678	0.252307	Maybridge	BTB 01708	MAC-0002604
6	D8	0.562	0.606	0.253	0.241	0.611678	0.246307	Maybridge	BTB 01773	MAC-0002627
6	D9	0.562	0.592	0.248	0.24	0.604678	0.243307	Maybridge	BTB 01790	MAC-0002642
6	D10	0.569	0.608	0.224	0.238	0.616178	0.230307	Maybridge	BTB 01855	MAC-0002673
6	D11	0.603	0.622	0.266	0.253	0.640178	0.258807	Maybridge	BTB 01903	MAC-0002700
6	E2	0.583	0.609	0.257	0.252	0.623678	0.253807	Maybridge	BTB 01311	MAC-0002439
6	E3	0.571	0.589	0.252	0.245	0.607678	0.247807	Maybridge	BTB 01363	MAC-0002466
6	E4	0.546	0.586	0.238	0.241	0.593678	0.238807	Maybridge	BTB 01427	MAC-0002502
6	E5	0.56	0.585	0.249	0.239	0.600178	0.243307	Maybridge	BTB 01500	MAC-0002543
6	E6	0.562	0.588	0.244	0.245	0.602678	0.243807	Maybridge	BTB 01677	MAC-0002592
6	E7	0.555	0.591	0.251	0.242	0.600678	0.245807	Maybridge	BTB 01709	MAC-0002605
6	E8	0.559	0.579	0.235	0.244	0.596678	0.238807	Maybridge	BTB 01774	MAC-0002628
6	E9	0.557	0.602	0.242	0.244	0.607178	0.242307	Maybridge	BTB 01794	MAC-0002644
6	E10	0.558	0.614	0.229	0.238	0.613678	0.232807	Maybridge	BTB 01856	MAC-0002674
6	E11	0.582	0.614	0.243	0.252	0.625678	0.246807	Maybridge	BTB 01909	MAC-0002705
6	F2	0.586	0.611	0.254	0.251	0.626178	0.251807	Maybridge	BTB 01312	MAC-0152511
6	F3	0.588	0.604	0.249	0.256	0.623678	0.251807	Maybridge	BTB 01379	MAC-0002471
6	F4	0.58	0.598	0.252	0.241	0.616678	0.245807	Maybridge	BTB 01442	MAC-0002515
6	F5	0.586	0.597	0.257	0.244	0.619178	0.249807	Maybridge	BTB 01516	MAC-0002549
6	F6	0.585	0.602	0.266	0.246	0.621178	0.255307	Maybridge	BTB 01689	MAC-0002596
6	F7	0.574	0.598	0.242	0.245	0.613678	0.242807	Maybridge	BTB 01718	MAC-0002606
6	F8	0.594	0.603	0.248	0.244	0.626178	0.245307	Maybridge	BTB 01778	MAC-0002632
6	F9	0.567	0.591	0.245	0.252	0.606678	0.247807	Maybridge	BTB 01828	MAC-0002657
6	F10	0.565	0.605	0.235	0.259	0.612678	0.246307	Maybridge	BTB 01874	MAC-0002681
6	F11	0.576	0.61	0.258	0.248	0.620678	0.252307	Maybridge	BTB 01951	MAC-0002719
6	G2	0.57	0.587	0.235	0.234	0.606178	0.233807	Maybridge	BTB 01314	MAC-0002441
6	G3	0.553	0.593	0.244	0.245	0.600678	0.243807	Maybridge	BTB 01383	MAC-0002472
6	G4	0.584	0.608	0.234	0.233	0.623678	0.232807	Maybridge	BTB 01444	MAC-0002517
6	G5	0.573	0.596	0.246	0.24	0.612178	0.242307	Maybridge	BTB 01563	MAC-0002564
6	G6	0.576	0.601	0.239	0.237	0.616178	0.237307	Maybridge	BTB 01691	MAC-0002598
6	G7	0.578	0.608	0.245	0.246	0.620678	0.244807	Maybridge	BTB 01732	MAC-0002610
6	G8	0.578	0.609	0.241	0.228	0.621178	0.233807	Maybridge	BTB 01780	MAC-0002633
6	G9	0.586	0.614	0.232	0.241	0.627678	0.235807	Maybridge	BTB 01835	MAC-0002659
6	G10	0.606	0.614	0.229	0.241	0.637678	0.234307	Maybridge	BTB 01879	MAC-0002685
6	G11	0.595	0.598	0.244	0.253	0.624178	0.247807	Maybridge	BTB 01953	MAC-0002721
6	H2	0.628	0.621	0.238	0.245	0.652178	0.240807	Maybridge	BTB 01322	MAC-0002446
6	H3	0.629	0.613	0.254	0.252	0.648678	0.252307	Maybridge	BTB 01384	MAC-0002473
6	H4	0.623	0.611	0.255	0.255	0.644678	0.254307	Maybridge	BTB 01463	MAC-0002526
6	H5	0.612	0.61	0.252	0.241	0.638678	0.245807	Maybridge	BTB 01566	MAC-0002567
6	H6	0.572	0.576	0.252	0.247	0.601678	0.248807	Maybridge	BTB 01692	MAC-0002599
6	H7	0.626	0.621	0.255	0.238	0.651178	0.245807	Maybridge	BTB 01740	MAC-0002617
6	H8	0.609	0.615	0.262	0.243	0.639678	0.251807	Maybridge	BTB 01782	MAC-0002635
6	H9	0.622	0.62	0.25	0.239	0.648678	0.243807	Maybridge	BTB 01842	MAC-0152569
6	H10	0.625	0.616	0.241	0.245	0.648178	0.242307	Maybridge	BTB 01891	MAC-0002692
6	H11	0.616	0.597	0.231	0.244	0.634178	0.236807	Maybridge	BTB 01954	MAC-0002722
7	A2	0.63	0.628	0.258	0.254	0.628878	0.269182	Maybridge	BTB 01956	MAC-0002724
7	A3	0.623	0.63	0.258	0.254	0.626378	0.269182	Maybridge	BTB 02015	MAC-0002760
7	A4	0.62	0.631	0.258	0.261	0.625378	0.272682	Maybridge	BTB 02073	MAC-0002793
7	A5	0.623	0.631	0.27	0.256	0.626878	0.276182	Maybridge	BTB 02153	MAC-0002832
7	A6	0.628	0.625	0.26	0.256	0.626378	0.271182	Maybridge	BTB 02202	MAC-0002859
7	A7	0.631	0.627	0.265	0.253	0.628878	0.272182	Maybridge	BTB 02230	MAC-0002876
7	A8	0.617	0.629	0.258	0.252	0.622878	0.268182	Maybridge	BTB 02276	MAC-0002894
7	A9	0.623	0.628	0.263	0.253	0.625378	0.271182	Maybridge	BTB 02343	MAC-0002931
7	A10	0.633	0.636	0.271	0.248	0.634378	0.272682	Maybridge	BTB 02377	MAC-0002954
7	A11	0.638	0.641	0.272	0.252	0.639378	0.275182	Maybridge	BTB 02423	MAC-0002979
7	B2	0.616	0.621	0.277	0.276	0.618378	0.289682	Maybridge	BTB 01967	MAC-0002731
7	B3	0.626	0.622	0.28	0.278	0.623878	0.292182	Maybridge	BTB 02027	MAC-0002766
7	B4	0.612	0.625	0.271	0.278	0.618378	0.287682	Maybridge	BTB 02076	MAC-0002796
7	B5	0.611	0.609	0.211	0.232	0.609878	0.234682	Maybridge	BTB 02162	MAC-0002837
7	B6	0.626	0.617	0.266	0.275	0.621378	0.283682	Maybridge	BTB 02210	MAC-0002862
7	B7	0.612	0.623	0.25	0.274	0.617378	0.275182	Maybridge	BTB 02235	MAC-0152627
7	B8	0.621	0.626	0.244	0.264	0.623378	0.267182	Maybridge	BTB 02279	MAC-0002895
7	B9	0.611	0.605	0.24	0.246	0.607878	0.256182	Maybridge	BTB 02345	MAC-0002933
7	B10	0.626	0.634	0.243	0.25	0.629878	0.259682	Maybridge	BTB 02383	MAC-0002960
7	B11	0.627	0.613	0.261	0.248	0.619878	0.267682	Maybridge	BTB 02424	MAC-0002980
7	C2	0.606	0.616	0.273	0.27	0.610878	0.284682	Maybridge	BTB 01988	MAC-0002743
7	C3	0.606	0.612	0.258	0.269	0.608878	0.276682	Maybridge	BTB 02050	MAC-0002780
7	C4	0.601	0.607	0.254	0.27	0.603878	0.275182	Maybridge	BTB 02088	MAC-0002804
7	C5	0.6	0.6	0.236	0.267	0.599878	0.264682	Maybridge	BTB 02165	MAC-0152612
7	C6	0.611	0.604	0.252	0.264	0.607378	0.271182	Maybridge	BTB 02211	MAC-0002863
7	C7	0.595	0.609	0.212	0.254	0.601878	0.246182	Maybridge	BTB 02242	MAC-0002881
7	C8	0.609	0.596	0.206	0.244	0.602378	0.238182	Maybridge	BTB 02294	MAC-0002902
7	C9	0.613	0.611	0.193	0.246	0.611878	0.232682	Maybridge	BTB 02352	MAC-0002938
7	C10	0.614	0.622	0.199	0.235	0.617878	0.230182	Maybridge	BTB 02385	MAC-0002961
7	C11	0.617	0.625	0.206	0.227	0.620878	0.229682	Maybridge	BTB 02428	MAC-0002981
7	D2	0.618	0.621	0.267	0.258	0.619378	0.275682	Maybridge	BTB 01993	MAC-0002747
7	D3	0.611	0.619	0.257	0.263	0.614878	0.273182	Maybridge	BTB 02051	MAC-0002781
7	D4	0.627	0.628	0.256	0.256	0.627378	0.269182	Maybridge	BTB 02101	MAC-0002809
7	D5	0.627	0.623	0.248	0.271	0.624878	0.272682	Maybridge	BTB 02170	MAC-0002843
7	D6	0.611	0.613	0.226	0.271	0.611878	0.261682	Maybridge	BTB 02222	MAC-0002869
7	D7	0.62	0.615	0.211	0.258	0.617378	0.247682	Maybridge	BTB 02243	MAC-0152629
7	D8	0.616	0.622	0.219	0.256	0.618878	0.250682	Maybridge	BTB 02298	MAC-0002903
7	D9	0.609	0.619	0.191	0.231	0.613878	0.224182	Maybridge	BTB 02361	MAC-0000068
7	D10	0.625	0.617	0.202	0.233	0.620878	0.230682	Maybridge	BTB 02387	MAC-0152653
7	D11	0.629	0.627	0.216	0.212	0.627878	0.227182	Maybridge	BTB 02436	MAC-0002983
7	E2	0.608	0.616	0.265	0.251	0.611878	0.271182	Maybridge	BTB 01995	MAC-0002749
7	E3	0.602	0.612	0.252	0.252	0.606878	0.265182	Maybridge	BTB 02058	MAC-0002785
7	E4	0.588	0.601	0.239	0.256	0.594378	0.260682	Maybridge	BTB 02113	MAC-0002813
7	E5	0.606	0.606	0.234	0.263	0.605878	0.261682	Maybridge	BTB 02179	MAC-0002846
7	E6	0.61	0.584	0.223	0.272	0.596878	0.260682	Maybridge	BTB 02224	MAC-0002871
7	E7	0.627	0.614	0.194	0.233	0.620378	0.226682	Maybridge	BTB 02245	MAC-0152630
7	E8	0.613	0.609	0.188	0.232	0.610878	0.223182	Maybridge	BTB 02308	MAC-0002907
7	E9	0.624	0.611	0.183	0.224	0.617378	0.216682	Maybridge	BTB 02367	MAC-0002946
7	E10	0.621	0.615	0.186	0.214	0.617878	0.213182	Maybridge	BTB 02389	MAC-0002963
7	E11	0.621	0.612	0.192	0.205	0.616378	0.211682	Maybridge	BTB 02445	MAC-0002987
7	F2	0.623	0.623	0.271	0.247	0.622878	0.272182	Maybridge	BTB 02006	MAC-0002755
7	F3	0.609	0.612	0.247	0.239	0.610378	0.256182	Maybridge	BTB 02061	MAC-0002786
7	F4	0.621	0.612	0.24	0.259	0.616378	0.262682	Maybridge	BTB 02114	MAC-0002814
7	F5	0.607	0.621	0.216	0.261	0.613878	0.251682	Maybridge	BTB 02192	MAC-0002853
7	F6	0.624	0.622	0.177	0.237	0.622878	0.220182	Maybridge	BTB 02226	MAC-0152623
7	F7	0.611	0.616	0.193	0.242	0.613378	0.230682	Maybridge	BTB 02247	MAC-0002882
7	F8	0.612	0.611	0.184	0.225	0.611378	0.217682	Maybridge	BTB 02310	MAC-0152639
7	F9	0.627	0.627	0.205	0.231	0.626878	0.231182	Maybridge	BTB 02369	MAC-0002947
7	F10	0.622	0.627	0.19	0.224	0.624378	0.220182	Maybridge	BTB 02399	MAC-0002972
7	F11	0.625	0.632	0.204	0.202	0.628378	0.216182	Maybridge	BTB 02457	MAC-0002993
7	G2	0.615	0.622	0.257	0.249	0.618378	0.266182	Maybridge	BTB 02009	MAC-0002757
7	G3	0.607	0.604	0.246	0.244	0.605378	0.258182	Maybridge	BTB 02067	MAC-0002788
7	G4	0.601	0.617	0.222	0.25	0.608878	0.249182	Maybridge	BTB 02126	MAC-0002820
7	G5	0.607	0.609	0.194	0.247	0.607878	0.233682	Maybridge	BTB 02195	MAC-0002855
7	G6	0.614	0.611	0.175	0.21	0.612378	0.205682	Maybridge	BTB 02227	MAC-0002873
7	G7	0.621	0.624	0.174	0.238	0.622378	0.219182	Maybridge	BTB 02251	MAC-0002883
7	G8	0.618	0.605	0.189	0.226	0.611378	0.220682	Maybridge	BTB 02321	MAC-0002913
7	G9	0.606	0.611	0.175	0.202	0.608378	0.201682	Maybridge	BTB 02370	MAC-0002948
7	G10	0.616	0.623	0.173	0.214	0.619378	0.206682	Maybridge	BTB 02402	MAC-0002974
7	G11	0.634	0.627	0.194	0.19	0.630378	0.205182	Maybridge	BTB 02458	MAC-0002994
7	H2	0.648	0.648	0.268	0.272	0.647878	0.283182	Maybridge	BTB 02012	MAC-0002759
7	H3	0.647	0.654	0.256	0.261	0.650378	0.271682	Maybridge	BTB 02068	MAC-0002789
7	H4	0.633	0.62	0.228	0.276	0.626378	0.265182	Maybridge	BTB 02142	MAC-0002829
7	H5	0.646	0.642	0.206	0.271	0.643878	0.251682	Maybridge	BTB 02201	MAC-0002858
7	H6	0.651	0.652	0.207	0.248	0.651378	0.240682	Maybridge	BTB 02229	MAC-0000066
7	H7	0.635	0.653	0.181	0.235	0.643878	0.221182	Maybridge	BTB 02264	MAC-0002890
7	H8	0.658	0.638	0.18	0.224	0.647878	0.215182	Maybridge	BTB 02329	MAC-0002918
7	H9	0.645	0.641	0.187	0.21	0.642878	0.211682	Maybridge	BTB 02372	MAC-0002949
7	H10	0.654	0.654	0.184	0.192	0.653878	0.201182	Maybridge	BTB 02406	MAC-0002976
7	H11	0.644	0.664	0.213	0.193	0.653878	0.216182	Maybridge	BTB 02465	MAC-0002999
8	A2	0.623	0.628	0.251	0.247	0.619153	0.238332	Maybridge	BTB 02467	MAC-0003000
8	A3	0.623	0.632	0.253	0.245	0.621153	0.238332	Maybridge	BTB 02539	MAC-0003036
8	A4	0.628	0.634	0.253	0.244	0.624653	0.237832	Maybridge	BTB 02580	MAC-0003062
8	A5	0.629	0.639	0.256	0.25	0.627653	0.242332	Maybridge	BTB 02630	MAC-0003082
8	A6	0.624	0.614	0.256	0.248	0.612653	0.241332	Maybridge	BTB 02678	MAC-0003104
8	A7	0.642	0.636	0.259	0.247	0.632653	0.242332	Maybridge	BTB 02718	MAC-0003126
8	A8	0.628	0.636	0.253	0.254	0.625653	0.242832	Maybridge	BTB 02785	MAC-0003165
8	A9	0.632	0.635	0.265	0.264	0.627153	0.253832	Maybridge	BTB 02818	MAC-0003184
8	A10	0.637	0.633	0.275	0.273	0.628653	0.263332	Maybridge	BTB 02879	MAC-0003218
8	A11	0.644	0.653	0.267	0.273	0.642153	0.259332	Maybridge	BTB 02919	MAC-0003240
8	B2	0.629	0.626	0.268	0.264	0.621153	0.255332	Maybridge	BTB 02472	MAC-0003001
8	B3	0.627	0.63	0.27	0.26	0.622153	0.254332	Maybridge	BTB 02547	MAC-0003044
8	B4	0.637	0.633	0.273	0.268	0.628653	0.259832	Maybridge	BTB 02588	MAC-0003066
8	B5	0.624	0.616	0.275	0.268	0.613653	0.260832	Maybridge	BTB 02634	MAC-0003084
8	B6	0.631	0.615	0.28	0.274	0.616653	0.266332	Maybridge	BTB 02679	MAC-0003105
8	B7	0.623	0.624	0.277	0.274	0.617153	0.264832	Maybridge	BTB 02719	MAC-0003127
8	B8	0.62	0.618	0.282	0.28	0.612653	0.270332	Maybridge	BTB 02786	MAC-0003166
8	B9	0.615	0.598	0.277	0.269	0.600153	0.262332	Maybridge	BTB 02819	MAC-0003185
8	B10	0.628	0.637	0.273	0.271	0.626153	0.261332	Maybridge	BTB 02886	MAC-0003221
8	B11	0.622	0.617	0.278	0.275	0.613153	0.265832	Maybridge	BTB 02925	MAC-0003246
8	C2	0.621	0.621	0.256	0.254	0.614653	0.244332	Maybridge	BTB 02473	MAC-0003002
8	C3	0.626	0.622	0.266	0.26	0.617653	0.252332	Maybridge	BTB 02557	MAC-0003049
8	C4	0.62	0.619	0.267	0.262	0.613153	0.253832	Maybridge	BTB 02598	MAC-0003071
8	C5	0.617	0.613	0.264	0.262	0.608653	0.252332	Maybridge	BTB 02635	MAC-0003085
8	C6	0.624	0.609	0.267	0.258	0.610153	0.251832	Maybridge	BTB 02684	MAC-0003108
8	C7	0.606	0.617	0.26	0.261	0.605153	0.249832	Maybridge	BTB 02726	MAC-0003131
8	C8	0.609	0.6	0.265	0.258	0.598153	0.250832	Maybridge	BTB 02788	MAC-0003167
8	C9	0.609	0.597	0.262	0.257	0.596653	0.248832	Maybridge	BTB 02837	MAC-0003193
8	C10	0.621	0.62	0.267	0.262	0.614153	0.253832	Maybridge	BTB 02903	MAC-0003228
8	C11	0.62	0.63	0.263	0.254	0.618653	0.247832	Maybridge	BTB 02927	MAC-0003248
8	D2	0.631	0.631	0.255	0.251	0.624653	0.242332	Maybridge	BTB 02493	MAC-0003009
8	D3	0.624	0.63	0.259	0.256	0.620653	0.246832	Maybridge	BTB 02558	MAC-0003050
8	D4	0.634	0.632	0.272	0.274	0.626653	0.262332	Maybridge	BTB 02602	MAC-0003073
8	D5	0.63	0.627	0.262	0.265	0.622153	0.252832	Maybridge	BTB 02636	MAC-0003086
8	D6	0.639	0.637	0.264	0.268	0.631653	0.255332	Maybridge	BTB 02685	MAC-0003109
8	D7	0.628	0.614	0.266	0.262	0.614653	0.253332	Maybridge	BTB 02738	MAC-0003138
8	D8	0.625	0.64	0.259	0.261	0.626153	0.249332	Maybridge	BTB 02789	MAC-0003168
8	D9	0.618	0.619	0.259	0.259	0.612153	0.248332	Maybridge	BTB 02841	MAC-0003197
8	D10	0.622	0.621	0.266	0.26	0.615153	0.252332	Maybridge	BTB 02905	MAC-0152733
8	D11	0.639	0.636	0.262	0.258	0.631153	0.249332	Maybridge	BTB 02947	MAC-0152741
8	E2	0.621	0.623	0.249	0.248	0.615653	0.237832	Maybridge	BTB 02496	MAC-0003012
8	E3	0.62	0.618	0.255	0.255	0.612653	0.244332	Maybridge	BTB 02561	MAC-0003051
8	E4	0.598	0.611	0.252	0.259	0.598153	0.244832	Maybridge	BTB 02611	MAC-0003076
8	E5	0.619	0.621	0.25	0.251	0.613653	0.239832	Maybridge	BTB 02641	MAC-0003088
8	E6	0.617	0.602	0.267	0.262	0.603153	0.253832	Maybridge	BTB 02691	MAC-0003112
8	E7	0.629	0.611	0.249	0.249	0.613653	0.238332	Maybridge	BTB 02749	MAC-0003141
8	E8	0.622	0.616	0.258	0.257	0.612653	0.246832	Maybridge	BTB 02791	MAC-0003170
8	E9	0.622	0.615	0.246	0.248	0.612153	0.236332	Maybridge	BTB 02848	MAC-0003200
8	E10	0.619	0.612	0.252	0.261	0.609153	0.245832	Maybridge	BTB 02908	MAC-0003231
8	E11	0.613	0.618	0.257	0.254	0.609153	0.244832	Maybridge	BTB 02955	MAC-0003259
8	F2	0.635	0.625	0.249	0.244	0.623653	0.235832	Maybridge	BTB 02511	MAC-0003019
8	F3	0.626	0.623	0.24	0.238	0.618153	0.228332	Maybridge	BTB 02565	MAC-0003054
8	F4	0.634	0.619	0.257	0.254	0.620153	0.244832	Maybridge	BTB 02612	MAC-0003077
8	F5	0.625	0.622	0.251	0.257	0.617153	0.243332	Maybridge	BTB 02643	MAC-0003089
8	F6	0.631	0.634	0.267	0.257	0.626153	0.251332	Maybridge	BTB 02692	MAC-0003113
8	F7	0.626	0.63	0.264	0.255	0.621653	0.248832	Maybridge	BTB 02758	MAC-0003148
8	F8	0.629	0.626	0.249	0.249	0.621153	0.238332	Maybridge	BTB 02800	MAC-0003174
8	F9	0.628	0.632	0.256	0.252	0.623653	0.243332	Maybridge	BTB 02863	MAC-0003210
8	F10	0.626	0.629	0.257	0.253	0.621153	0.244332	Maybridge	BTB 02910	MAC-0003233
8	F11	0.635	0.64	0.257	0.249	0.631153	0.242332	Maybridge	AC 11546	MAC-0152743
8	G2	0.631	0.623	0.244	0.249	0.620653	0.235832	Maybridge	BTB 02522	MAC-0003023
8	G3	0.616	0.604	0.24	0.235	0.603653	0.226832	Maybridge	BTB 02569	MAC-0003057
8	G4	0.619	0.62	0.249	0.249	0.613153	0.238332	Maybridge	BTB 02615	MAC-0003079
8	G5	0.621	0.616	0.258	0.253	0.612153	0.244832	Maybridge	BTB 02647	MAC-0003091
8	G6	0.623	0.619	0.259	0.255	0.614653	0.246332	Maybridge	BTB 02693	MAC-0003114
8	G7	0.621	0.633	0.248	0.257	0.620653	0.241832	Maybridge	BTB 02767	MAC-0003151
8	G8	0.629	0.615	0.25	0.248	0.615653	0.238332	Maybridge	BTB 02809	MAC-0003178
8	G9	0.615	0.617	0.252	0.257	0.609653	0.243832	Maybridge	BTB 02864	MAC-0003211
8	G10	0.629	0.638	0.242	0.255	0.627153	0.237832	Maybridge	BTB 02915	MAC-0003236
8	G11	0.62	0.615	0.261	0.267	0.611153	0.253332	Maybridge	BTB 02974	MAC-0003266
8	H2	0.648	0.648	0.255	0.261	0.641653	0.247332	Maybridge	BTB 02534	MAC-0003031
8	H3	0.646	0.653	0.256	0.266	0.643153	0.250332	Maybridge	BTB 02573	MAC-0003059
8	H4	0.646	0.643	0.277	0.278	0.638153	0.266832	Maybridge	BTB 02624	MAC-0003080
8	H5	0.657	0.651	0.28	0.276	0.647653	0.267332	Maybridge	BTB 02658	MAC-0003097
8	H6	0.664	0.652	0.271	0.27	0.651653	0.259832	Maybridge	BTB 02702	MAC-0152705
8	H7	0.662	0.664	0.275	0.269	0.656653	0.261332	Maybridge	BTB 02773	MAC-0003157
8	H8	0.653	0.659	0.269	0.263	0.649653	0.255332	Maybridge	BTB 02811	MAC-0003180
8	H9	0.658	0.652	0.255	0.261	0.648653	0.247332	Maybridge	BTB 02865	MAC-0003212
8	H10	0.66	0.663	0.252	0.266	0.655153	0.248332	Maybridge	BTB 02918	MAC-0003239
8	H11	0.655	0.669	0.264	0.287	0.655653	0.264832	Maybridge	BTB 02990	MAC-0003272
9	A2	0.626	0.631	0.241	0.246	0.623016	0.238444	Maybridge	BTB 03010	MAC-0003277
9	A3	0.638	0.639	0.258	0.257	0.633016	0.252444	Maybridge	BTB 03060	MAC-0003306
9	A4	0.629	0.633	0.253	0.255	0.625516	0.248944	Maybridge	BTB 03127	MAC-0003342
9	A5	0.637	0.636	0.249	0.254	0.631016	0.246444	Maybridge	BTB 03177	MAC-0003359
9	A6	0.634	0.636	0.255	0.254	0.629516	0.249444	Maybridge	BTB 03241	MAC-0003378
9	A7	0.636	0.636	0.256	0.242	0.630516	0.243944	Maybridge	BTB 03307	MAC-0152786
9	A8	0.634	0.64	0.248	0.235	0.631516	0.236444	Maybridge	BTB 03346	MAC-0003424
9	A9	0.635	0.635	0.262	0.237	0.629516	0.244444	Maybridge	BTB 03394	MAC-0003448
9	A10	0.648	0.634	0.268	0.239	0.635516	0.248444	Maybridge	BTB 03431	MAC-0003469
9	A11	0.636	0.641	0.273	0.264	0.633016	0.263444	Maybridge	BTB 03459	MAC-0003484
9	B2	0.628	0.624	0.27	0.262	0.620516	0.260944	Maybridge	BTB 03017	MAC-0003282
9	B3	0.644	0.634	0.277	0.265	0.633516	0.265944	Maybridge	BTB 03067	MAC-0003310
9	B4	0.627	0.627	0.274	0.272	0.621516	0.267944	Maybridge	BTB 03129	MAC-0152763
9	B5	0.626	0.617	0.275	0.262	0.616016	0.263444	Maybridge	BTB 03180	MAC-0003360
9	B6	0.631	0.625	0.275	0.23	0.622516	0.247444	Maybridge	BTB 03252	MAC-0003382
9	B7	0.625	0.625	0.275	0.219	0.619516	0.241944	Maybridge	BTB 03309	MAC-0152787
9	B8	0.625	0.632	0.279	0.21	0.623016	0.239444	Maybridge	BTB 03351	MAC-0003427
9	B9	0.616	0.607	0.274	0.22	0.606016	0.241944	Maybridge	BTB 03404	MAC-0003453
9	B10	0.64	0.638	0.272	0.229	0.633516	0.245444	Maybridge	BTB 03434	MAC-0003472
9	B11	0.625	0.615	0.281	0.248	0.614516	0.259444	Maybridge	BTB 03461	MAC-0003486
9	C2	0.625	0.62	0.268	0.273	0.617016	0.265444	Maybridge	BTB 03032	MAC-0003290
9	C3	0.62	0.618	0.27	0.271	0.613516	0.265444	Maybridge	BTB 03074	MAC-0000084
9	C4	0.614	0.616	0.263	0.269	0.609516	0.260944	Maybridge	BTB 03138	MAC-0003346
9	C5	0.609	0.613	0.263	0.264	0.605516	0.258444	Maybridge	BTB 03191	MAC-0003362
9	C6	0.619	0.61	0.266	0.25	0.609016	0.252944	Maybridge	BTB 03261	MAC-0003387
9	C7	0.602	0.608	0.272	0.242	0.599516	0.251944	Maybridge	BTB 03310	MAC-0003405
9	C8	0.616	0.605	0.262	0.206	0.605016	0.228944	Maybridge	BTB 03354	MAC-0003430
9	C9	0.616	0.611	0.251	0.203	0.608016	0.221944	Maybridge	BTB 03405	MAC-0003454
9	C10	0.622	0.619	0.268	0.208	0.615016	0.232944	Maybridge	BTB 03435	MAC-0003473
9	C11	0.628	0.63	0.257	0.23	0.623516	0.238444	Maybridge	BTB 03466	MAC-0003488
9	D2	0.628	0.628	0.261	0.266	0.622516	0.258444	Maybridge	BTB 03038	MAC-0003291
9	D3	0.616	0.626	0.261	0.265	0.615516	0.257944	Maybridge	BTB 03084	MAC-0152757
9	D4	0.627	0.626	0.259	0.252	0.621016	0.250444	Maybridge	BTB 03157	MAC-0003351
9	D5	0.619	0.623	0.263	0.267	0.615516	0.259944	Maybridge	BTB 03195	MAC-0003364
9	D6	0.636	0.632	0.276	0.254	0.628516	0.259944	Maybridge	BTB 03264	MAC-0003389
9	D7	0.612	0.614	0.282	0.265	0.607516	0.268444	Maybridge	BTB 03317	MAC-0003408
9	D8	0.621	0.639	0.258	0.228	0.624516	0.237944	Maybridge	BTB 03355	MAC-0003431
9	D9	0.616	0.62	0.251	0.2	0.612516	0.220444	Maybridge	BTB 03407	MAC-0003456
9	D10	0.625	0.615	0.27	0.206	0.614516	0.232944	Maybridge	BTB 03436	MAC-0003474
9	D11	0.637	0.632	0.254	0.232	0.629016	0.237944	Maybridge	BTB 03481	MAC-0003494
9	E2	0.624	0.626	0.263	0.256	0.619516	0.254444	Maybridge	BTB 03047	MAC-0003295
9	E3	0.613	0.615	0.259	0.258	0.608516	0.253444	Maybridge	BTB 03097	MAC-0003325
9	E4	0.542	0.552	0.269	0.272	0.541516	0.265444	Maybridge	BTB 03161	MAC-0003353
9	E5	0.609	0.609	0.257	0.257	0.603516	0.251944	Maybridge	BTB 03222	MAC-0003372
9	E6	0.613	0.596	0.26	0.262	0.599016	0.255944	Maybridge	BTB 03300	MAC-0003400
9	E7	0.625	0.612	0.247	0.244	0.613016	0.240444	Maybridge	BTB 03325	MAC-0003411
9	E8	0.615	0.609	0.26	0.217	0.606516	0.233444	Maybridge	BTB 03367	MAC-0003435
9	E9	0.626	0.611	0.249	0.206	0.613016	0.222444	Maybridge	BTB 03408	MAC-0003457
9	E10	0.622	0.616	0.252	0.206	0.613516	0.223944	Maybridge	BTB 03439	MAC-0003477
9	E11	0.624	0.627	0.25	0.242	0.620016	0.240944	Maybridge	BTB 03493	MAC-0003498
9	F2	0.636	0.628	0.263	0.255	0.626516	0.253944	Maybridge	BTB 03048	MAC-0003296
9	F3	0.623	0.617	0.256	0.251	0.614516	0.248444	Maybridge	BTB 03107	MAC-0003329
9	F4	0.629	0.615	0.262	0.245	0.616516	0.248444	Maybridge	BTB 03162	MAC-0003354
9	F5	0.616	0.618	0.249	0.256	0.611516	0.247444	Maybridge	BTB 03225	MAC-0003373
9	F6	0.625	0.619	0.254	0.257	0.616516	0.250444	Maybridge	BTB 03301	MAC-0003401
9	F7	0.621	0.62	0.26	0.244	0.615016	0.246944	Maybridge	BTB 03327	MAC-0003412
9	F8	0.623	0.623	0.258	0.23	0.617516	0.238944	Maybridge	BTB 03375	MAC-0003439
9	F9	0.62	0.621	0.25	0.226	0.615016	0.232944	Maybridge	BTB 03422	MAC-0003461
9	F10	0.624	0.619	0.257	0.25	0.616016	0.248444	Maybridge	BTB 03441	MAC-0003478
9	F11	0.635	0.63	0.253	0.26	0.627016	0.251444	Maybridge	BTB 03502	MAC-0003502
9	G2	0.627	0.625	0.255	0.259	0.620516	0.251944	Maybridge	BTB 03050	MAC-0003297
9	G3	0.611	0.598	0.243	0.254	0.599016	0.243444	Maybridge	BTB 03121	MAC-0003338
9	G4	0.611	0.612	0.254	0.255	0.606016	0.249444	Maybridge	BTB 03170	MAC-0003355
9	G5	0.619	0.61	0.256	0.25	0.609016	0.247944	Maybridge	BTB 03230	MAC-0003374
9	G6	0.617	0.609	0.252	0.25	0.607516	0.245944	Maybridge	BTB 03302	MAC-0003402
9	G7	0.61	0.615	0.259	0.259	0.607016	0.253944	Maybridge	BTB 03333	MAC-0003415
9	G8	0.622	0.61	0.254	0.249	0.610516	0.246444	Maybridge	BTB 03381	MAC-0003442
9	G9	0.613	0.615	0.25	0.234	0.608516	0.236944	Maybridge	BTB 03427	MAC-0003465
9	G10	0.638	0.64	0.254	0.242	0.633516	0.242944	Maybridge	BTB 03450	MAC-0003480
9	G11	0.634	0.628	0.262	0.252	0.625516	0.251944	Maybridge	BTB 03506	MAC-0003505
9	H2	0.654	0.648	0.268	0.275	0.645516	0.266444	Maybridge	BTB 03058	MAC-0003304
9	H3	0.645	0.646	0.245	0.247	0.640016	0.240944	Maybridge	BTB 03124	MAC-0003341
9	H4	0.644	0.638	0.26	0.266	0.635516	0.257944	Maybridge	BTB 03176	MAC-0003358
9	H5	0.649	0.638	0.277	0.269	0.638016	0.267944	Maybridge	BTB 03238	MAC-0003377
9	H6	0.659	0.649	0.268	0.262	0.648516	0.259944	Maybridge	BTB 03305	MAC-0003403
9	H7	0.656	0.651	0.268	0.267	0.648016	0.262444	Maybridge	BTB 03344	MAC-0003423
9	H8	0.649	0.64	0.266	0.264	0.639016	0.259944	Maybridge	BTB 03383	MAC-0003443
9	H9	0.655	0.645	0.27	0.238	0.644516	0.248944	Maybridge	BTB 03428	MAC-0003466
9	H10	0.656	0.648	0.262	0.249	0.646516	0.250444	Maybridge	BTB 03453	MAC-0003481
9	H11	0.657	0.67	0.268	0.255	0.658016	0.256444	Maybridge	BTB 03509	MAC-0003507
10	A2	0.64	0.623	0.249	0.242	0.637041	0.243982	Maybridge	BTB 03510	MAC-0003508
10	A3	0.634	0.619	0.252	0.249	0.632041	0.248982	Maybridge	BTB 03551	MAC-0003523
10	A4	0.62	0.602	0.255	0.252	0.616541	0.251982	Maybridge	BTB 03593	MAC-0003552
10	A5	0.634	0.621	0.253	0.247	0.633041	0.248482	Maybridge	BTB 03649	MAC-0003579
10	A6	0.628	0.609	0.253	0.246	0.624041	0.247982	Maybridge	BTB 03697	MAC-0003604
10	A7	0.629	0.609	0.264	0.248	0.624541	0.254482	Maybridge	BTB 03796	MAC-0152866
10	A8	0.627	0.607	0.25	0.244	0.622541	0.245482	Maybridge	BTB 03945	MAC-0003698
10	A9	0.627	0.614	0.261	0.26	0.626041	0.258982	Maybridge	BTB 04005	MAC-0152882
10	A10	0.641	0.612	0.271	0.264	0.632041	0.265982	Maybridge	BTB 04047	MAC-0003737
10	A11	0.639	0.63	0.267	0.259	0.640041	0.261482	Maybridge	BTB 04124	MAC-0003774
10	B2	0.63	0.617	0.275	0.269	0.629041	0.270482	Maybridge	BTB 03515	MAC-0003511
10	B3	0.632	0.609	0.28	0.272	0.626041	0.274482	Maybridge	BTB 03554	MAC-0003524
10	B4	0.608	0.588	0.268	0.269	0.603541	0.266982	Maybridge	BTB 03596	MAC-0003554
10	B5	0.617	0.595	0.266	0.272	0.611541	0.267482	Maybridge	BTB 03650	MAC-0003580
10	B6	0.618	0.588	0.258	0.259	0.608541	0.256982	Maybridge	BTB 03704	MAC-0003606
10	B7	0.572	0.557	0.248	0.264	0.570041	0.254482	Maybridge	BTB 03797	MAC-0152867
10	B8	0.615	0.606	0.26	0.269	0.616041	0.262982	Maybridge	BTB 03956	MAC-0152875
10	B9	0.614	0.59	0.255	0.26	0.607541	0.255982	Maybridge	BTB 04010	MAC-0003723
10	B10	0.627	0.616	0.255	0.265	0.627041	0.258482	Maybridge	BTB 04070	MAC-0003744
10	B11	0.618	0.59	0.259	0.255	0.609541	0.255482	Maybridge	BTB 04142	MAC-0003787
10	C2	0.627	0.607	0.27	0.267	0.622541	0.266982	Maybridge	BTB 03530	MAC-0003513
10	C3	0.619	0.604	0.268	0.263	0.617041	0.263982	Maybridge	BTB 03564	MAC-0152836
10	C4	0.611	0.599	0.263	0.268	0.610541	0.263982	Maybridge	BTB 03610	MAC-0003560
10	C5	0.61	0.601	0.264	0.262	0.611041	0.261482	Maybridge	BTB 03654	MAC-0003583
10	C6	0.614	0.596	0.254	0.254	0.610541	0.252482	Maybridge	BTB 03705	MAC-0003607
10	C7	0.555	0.55	0.248	0.26	0.558041	0.252482	Maybridge	BTB 03798	MAC-0152868
10	C8	0.609	0.58	0.237	0.238	0.600041	0.235982	Maybridge	BTB 03961	MAC-0003706
10	C9	0.611	0.598	0.238	0.256	0.610041	0.245482	Maybridge	BTB 04014	MAC-0003724
10	C10	0.614	0.6	0.222	0.244	0.612541	0.231482	Maybridge	BTB 04071	MAC-0003745
10	C11	0.602	0.571	0.215	0.217	0.592041	0.214482	Maybridge	BTB 04144	MAC-0003789
10	D2	0.625	0.62	0.262	0.255	0.628041	0.256982	Maybridge	BTB 03531	MAC-0003514
10	D3	0.617	0.611	0.262	0.252	0.619541	0.255482	Maybridge	BTB 03568	MAC-0000089
10	D4	0.626	0.62	0.27	0.265	0.628541	0.265982	Maybridge	BTB 03624	MAC-0003564
10	D5	0.618	0.614	0.26	0.262	0.621541	0.259482	Maybridge	BTB 03655	MAC-0003584
10	D6	0.633	0.628	0.286	0.272	0.636041	0.277482	Maybridge	BTB 03712	MAC-0003612
10	D7	0.616	0.607	0.26	0.26	0.617041	0.258482	Maybridge	BTB 03854	MAC-0003665
10	D8	0.603	0.615	0.238	0.252	0.614541	0.243482	Maybridge	BTB 03962	MAC-0003707
10	D9	0.57	0.564	0.245	0.264	0.572541	0.252982	Maybridge	BTB 04022	MAC-0000094
10	D10	0.618	0.604	0.218	0.237	0.616541	0.225982	Maybridge	BTB 04075	MAC-0003748
10	D11	0.625	0.599	0.23	0.232	0.617541	0.229482	Maybridge	BTB 04147	MAC-0003791
10	E2	0.616	0.612	0.26	0.266	0.619541	0.261482	Maybridge	BTB 03541	MAC-0003518
10	E3	0.608	0.61	0.266	0.254	0.614541	0.258482	Maybridge	BTB 03576	MAC-0003537
10	E4	0.531	0.542	0.271	0.274	0.542041	0.270982	Maybridge	BTB 03626	MAC-0003566
10	E5	0.604	0.603	0.259	0.25	0.609041	0.252982	Maybridge	BTB 03663	MAC-0003587
10	E6	0.612	0.59	0.266	0.247	0.606541	0.254982	Maybridge	BTB 03738	MAC-0003630
10	E7	0.601	0.592	0.241	0.24	0.602041	0.238982	Maybridge	BTB 03865	MAC-0003670
10	E8	0.604	0.601	0.222	0.239	0.608041	0.228982	Maybridge	BTB 03965	MAC-0003710
10	E9	0.616	0.606	0.238	0.243	0.616541	0.238982	Maybridge	BTB 04026	MAC-0003729
10	E10	0.619	0.599	0.199	0.219	0.614541	0.207482	Maybridge	BTB 04093	MAC-0003755
10	E11	0.616	0.588	0.196	0.203	0.607541	0.197982	Maybridge	BTB 04171	MAC-0003805
10	F2	0.631	0.616	0.262	0.259	0.629041	0.258982	Maybridge	BTB 03545	MAC-0003520
10	F3	0.62	0.612	0.26	0.267	0.621541	0.261982	Maybridge	BTB 03578	MAC-0003539
10	F4	0.626	0.61	0.264	0.25	0.623541	0.255482	Maybridge	BTB 03640	MAC-0003572
10	F5	0.618	0.62	0.257	0.247	0.624541	0.250482	Maybridge	BTB 03665	MAC-0003589
10	F6	0.621	0.613	0.254	0.247	0.622541	0.248982	Maybridge	BTB 03744	MAC-0003634
10	F7	0.618	0.614	0.248	0.244	0.621541	0.244482	Maybridge	BTB 03877	MAC-0003676
10	F8	0.622	0.62	0.244	0.248	0.626541	0.244482	Maybridge	BTB 03978	MAC-0003713
10	F9	0.619	0.616	0.234	0.244	0.623041	0.237482	Maybridge	BTB 04039	MAC-0003731
10	F10	0.617	0.611	0.209	0.247	0.619541	0.226482	Maybridge	BTB 04099	MAC-0152895
10	F11	0.629	0.593	0.209	0.228	0.616541	0.216982	Maybridge	BTB 04173	MAC-0003807
10	G2	0.613	0.608	0.267	0.262	0.616041	0.262982	Maybridge	BTB 03547	MAC-0003521
10	G3	0.608	0.585	0.264	0.255	0.602041	0.257982	Maybridge	BTB 03581	MAC-0003542
10	G4	0.611	0.611	0.249	0.255	0.616541	0.250482	Maybridge	BTB 03642	MAC-0003573
10	G5	0.612	0.603	0.248	0.237	0.613041	0.240982	Maybridge	BTB 03675	MAC-0003592
10	G6	0.614	0.607	0.248	0.243	0.616041	0.243982	Maybridge	BTB 03746	MAC-0003635
10	G7	0.61	0.612	0.237	0.243	0.616541	0.238482	Maybridge	BTB 03902	MAC-0152872
10	G8	0.619	0.603	0.221	0.225	0.616541	0.221482	Maybridge	BTB 03991	MAC-0003718
10	G9	0.609	0.601	0.214	0.242	0.610541	0.226482	Maybridge	BTB 04042	MAC-0003734
10	G10	0.628	0.625	0.192	0.224	0.632041	0.206482	Maybridge	BTB 04111	MAC-0003765
10	G11	0.627	0.598	0.21	0.219	0.618041	0.212982	Maybridge	BTB 04177	MAC-0003810
10	H2	0.646	0.616	0.268	0.263	0.636541	0.263982	Maybridge	BTB 03549	MAC-0003522
10	H3	0.644	0.635	0.277	0.277	0.645041	0.275482	Maybridge	BTB 03584	MAC-0003543
10	H4	0.632	0.613	0.267	0.255	0.628041	0.259482	Maybridge	BTB 03644	MAC-0003575
10	H5	0.646	0.609	0.261	0.259	0.633041	0.258482	Maybridge	BTB 03685	MAC-0003598
10	H6	0.657	0.63	0.259	0.25	0.649041	0.252982	Maybridge	BTB 03781	MAC-0003644
10	H7	0.649	0.63	0.25	0.264	0.645041	0.255482	Maybridge	BTB 03903	MAC-0003686
10	H8	0.647	0.626	0.216	0.257	0.642041	0.234982	Maybridge	BTB 03999	MAC-0003720
10	H9	0.648	0.618	0.215	0.257	0.638541	0.234482	Maybridge	BTB 04043	MAC-0003735
10	H10	0.657	0.623	0.22	0.247	0.645541	0.231982	Maybridge	BTB 04119	MAC-0003771
10	H11	0.66	0.63	0.212	0.247	0.650541	0.227982	Maybridge	BTB 04184	MAC-0152905
11	A2	0.636	0.637	0.24	0.248	0.629341	0.232832	Maybridge	BTB 04185	MAC-0003814
11	A3	0.639	0.64	0.245	0.251	0.632341	0.236832	Maybridge	BTB 04246	MAC-0003851
11	A4	0.634	0.636	0.241	0.247	0.627841	0.232832	Maybridge	BTB 04309	MAC-0003880
11	A5	0.635	0.642	0.242	0.249	0.631341	0.234332	Maybridge	BTB 04367	MAC-0152930
11	A6	0.627	0.627	0.25	0.256	0.619841	0.241832	Maybridge	BTB 04404	MAC-0003929
11	A7	0.635	0.629	0.247	0.249	0.624841	0.236832	Maybridge	BTB 04465	MAC-0003962
11	A8	0.624	0.628	0.248	0.249	0.618841	0.237332	Maybridge	BTB 04523	MAC-0003997
11	A9	0.632	0.632	0.263	0.246	0.624841	0.243332	Maybridge	BTB 04588	MAC-0004023
11	A10	0.636	0.623	0.27	0.27	0.622341	0.258832	Maybridge	BTB 04626	MAC-0004045
11	A11	0.626	0.636	0.265	0.276	0.623841	0.259332	Maybridge	BTB 04687	MAC-0004080
11	B2	0.622	0.633	0.267	0.27	0.620341	0.257332	Maybridge	BTB 04188	MAC-0003817
11	B3	0.631	0.631	0.273	0.269	0.623841	0.259832	Maybridge	BTB 04252	MAC-0152915
11	B4	0.623	0.63	0.276	0.275	0.619341	0.264332	Maybridge	BTB 04328	MAC-0003888
11	B5	0.625	0.616	0.272	0.273	0.613341	0.261332	Maybridge	BTB 04372	MAC-0003910
11	B6	0.632	0.62	0.275	0.277	0.618841	0.264832	Maybridge	BTB 04417	MAC-0000098
11	B7	0.625	0.63	0.277	0.277	0.620341	0.265832	Maybridge	BTB 04485	MAC-0003974
11	B8	0.625	0.633	0.276	0.28	0.621841	0.266832	Maybridge	BTB 04527	MAC-0004000
11	B9	0.628	0.62	0.271	0.27	0.616841	0.259332	Maybridge	BTB 04595	MAC-0004027
11	B10	0.626	0.639	0.273	0.272	0.625341	0.261332	Maybridge	BTB 04636	MAC-0004046
11	B11	0.626	0.616	0.281	0.27	0.613841	0.264332	Maybridge	BTB 04693	MAC-0004085
11	C2	0.618	0.621	0.266	0.269	0.612341	0.256332	Maybridge	BTB 04198	MAC-0003824
11	C3	0.624	0.625	0.269	0.267	0.617341	0.256832	Maybridge	BTB 04267	MAC-0003856
11	C4	0.618	0.618	0.266	0.272	0.610841	0.257832	Maybridge	BTB 04331	MAC-0003890
11	C5	0.622	0.617	0.265	0.27	0.612341	0.256332	Maybridge	BTB 04379	MAC-0003914
11	C6	0.619	0.614	0.26	0.266	0.609341	0.251832	Maybridge	BTB 04422	MAC-0003943
11	C7	0.608	0.623	0.259	0.271	0.608341	0.253832	Maybridge	BTB 04494	MAC-0003979
11	C8	0.616	0.608	0.263	0.266	0.604841	0.253332	Maybridge	BTB 04532	MAC-0152956
11	C9	0.618	0.62	0.251	0.262	0.611841	0.245332	Maybridge	BTB 04597	MAC-0004029
11	C10	0.623	0.629	0.266	0.267	0.618841	0.255332	Maybridge	BTB 04656	MAC-0004058
11	C11	0.622	0.63	0.252	0.268	0.618841	0.248832	Maybridge	BTB 04698	MAC-0004088
11	D2	0.624	0.628	0.258	0.268	0.618841	0.251832	Maybridge	BTB 04214	MAC-0003833
11	D3	0.62	0.627	0.26	0.273	0.616341	0.255332	Maybridge	BTB 04270	MAC-0003859
11	D4	0.632	0.632	0.265	0.27	0.624841	0.256332	Maybridge	BTB 04334	MAC-0003893
11	D5	0.632	0.625	0.265	0.271	0.621341	0.256832	Maybridge	BTB 04385	MAC-0003920
11	D6	0.641	0.638	0.273	0.276	0.632341	0.263332	Maybridge	BTB 04424	MAC-0003945
11	D7	0.63	0.624	0.264	0.269	0.619841	0.255332	Maybridge	BTB 04495	MAC-0003980
11	D8	0.623	0.646	0.244	0.262	0.627341	0.241832	Maybridge	BTB 04536	MAC-0004003
11	D9	0.618	0.62	0.257	0.271	0.611841	0.252832	Maybridge	BTB 04603	MAC-0004031
11	D10	0.61	0.623	0.255	0.248	0.609341	0.240332	Maybridge	BTB 04659	MAC-0004060
11	D11	0.636	0.637	0.251	0.257	0.629341	0.242832	Maybridge	BTB 04699	MAC-0004089
11	E2	0.621	0.629	0.257	0.258	0.617841	0.246332	Maybridge	BTB 04217	MAC-0003835
11	E3	0.61	0.617	0.254	0.26	0.606341	0.245832	Maybridge	BTB 04272	MAC-0003861
11	E4	0.593	0.61	0.247	0.265	0.594341	0.244832	Maybridge	BTB 04342	MAC-0003894
11	E5	0.616	0.618	0.257	0.26	0.609841	0.247332	Maybridge	BTB 04390	MAC-0003923
11	E6	0.623	0.605	0.25	0.258	0.606841	0.242832	Maybridge	BTB 04438	MAC-0003949
11	E7	0.63	0.624	0.259	0.259	0.619841	0.247832	Maybridge	BTB 04497	MAC-0003981
11	E8	0.624	0.62	0.249	0.256	0.614841	0.241332	Maybridge	BTB 04545	MAC-0004006
11	E9	0.633	0.625	0.257	0.251	0.621841	0.242832	Maybridge	BTB 04605	MAC-0004033
11	E10	0.623	0.617	0.235	0.249	0.612841	0.230832	Maybridge	BTB 04673	MAC-0004068
11	E11	0.623	0.633	0.248	0.222	0.620841	0.223832	Maybridge	BTB 04710	MAC-0152982
11	F2	0.628	0.63	0.255	0.254	0.621841	0.243332	Maybridge	BTB 04228	MAC-0003840
11	F3	0.605	0.604	0.253	0.251	0.597341	0.240832	Maybridge	BTB 04275	MAC-0003864
11	F4	0.63	0.623	0.254	0.251	0.619341	0.241332	Maybridge	BTB 04348	MAC-0003900
11	F5	0.615	0.632	0.244	0.253	0.616341	0.237332	Maybridge	BTB 04396	MAC-0003926
11	F6	0.63	0.63	0.267	0.267	0.622841	0.255832	Maybridge	BTB 04450	MAC-0003950
11	F7	0.622	0.628	0.234	0.254	0.617841	0.232832	Maybridge	BTB 04498	MAC-0003982
11	F8	0.624	0.626	0.237	0.257	0.617841	0.235832	Maybridge	BTB 04552	MAC-0004008
11	F9	0.618	0.623	0.232	0.253	0.613341	0.231332	Maybridge	BTB 04610	MAC-0004036
11	F10	0.624	0.631	0.246	0.247	0.620341	0.235332	Maybridge	BTB 04674	MAC-0004069
11	F11	0.637	0.64	0.261	0.264	0.631341	0.251332	Maybridge	BTB 04711	MAC-0004095
11	G2	0.62	0.622	0.248	0.247	0.613841	0.236332	Maybridge	BTB 04230	MAC-0003842
11	G3	0.606	0.6	0.247	0.239	0.595841	0.231832	Maybridge	BTB 04286	MAC-0003871
11	G4	0.606	0.617	0.246	0.253	0.604341	0.238332	Maybridge	BTB 04351	MAC-0003902
11	G5	0.619	0.616	0.255	0.256	0.610341	0.244332	Maybridge	BTB 04400	MAC-0003927
11	G6	0.609	0.61	0.241	0.251	0.602341	0.234832	Maybridge	BTB 04457	MAC-0003955
11	G7	0.615	0.625	0.251	0.259	0.612841	0.243832	Maybridge	BTB 04499	MAC-0003983
11	G8	0.624	0.617	0.242	0.251	0.613341	0.235332	Maybridge	BTB 04558	MAC-0004011
11	G9	0.613	0.618	0.248	0.245	0.608341	0.235332	Maybridge	BTB 04611	MAC-0004037
11	G10	0.628	0.641	0.255	0.258	0.627341	0.245332	Maybridge	BTB 04682	MAC-0004075
11	G11	0.643	0.636	0.265	0.263	0.632341	0.252832	Maybridge	BTB 04712	MAC-0004096
11	H2	0.664	0.667	0.262	0.257	0.658341	0.248332	Maybridge	BTB 04238	MAC-0003849
11	H3	0.646	0.654	0.261	0.257	0.642841	0.247832	Maybridge	BTB 04308	MAC-0003879
11	H4	0.641	0.65	0.256	0.261	0.638341	0.247332	Maybridge	BTB 04355	MAC-0003903
11	H5	0.651	0.65	0.257	0.271	0.643341	0.252832	Maybridge	BTB 04401	MAC-0003928
11	H6	0.658	0.664	0.254	0.265	0.653841	0.248332	Maybridge	BTB 04461	MAC-0003958
11	H7	0.651	0.668	0.262	0.264	0.652341	0.251832	Maybridge	BTB 04502	MAC-0003986
11	H8	0.65	0.666	0.265	0.272	0.650841	0.257332	Maybridge	BTB 04584	MAC-0004021
11	H9	0.652	0.655	0.265	0.257	0.646341	0.249832	Maybridge	BTB 04615	MAC-0004040
11	H10	0.665	0.666	0.271	0.262	0.658341	0.255332	Maybridge	BTB 04683	MAC-0004076
11	H11	0.66	0.679	0.278	0.279	0.662341	0.267332	Maybridge	BTB 04717	MAC-0004098
12	A2	0.551	0.543	0.188	0.184	0.534566	0.200619	Maybridge	BTB 04719	MAC-0004099
12	A3	0.647	0.647	0.244	0.253	0.634566	0.263119	Maybridge	BTB 04775	MAC-0004130
12	A4	0.63	0.623	0.255	0.259	0.614066	0.271619	Maybridge	BTB 04820	MAC-0004154
12	A5	0.644	0.637	0.247	0.25	0.628066	0.263119	Maybridge	BTB 04889	MAC-0004194
12	A6	0.636	0.644	0.247	0.248	0.627566	0.262119	Maybridge	BTB 04957	MAC-0153018
12	A7	0.636	0.643	0.255	0.247	0.627066	0.265619	Maybridge	BTB 05059	MAC-0004306
12	A8	0.638	0.64	0.248	0.237	0.626566	0.257119	Maybridge	BTB 05120	MAC-0004335
12	A9	0.626	0.633	0.266	0.23	0.617066	0.262619	Maybridge	BTB 05159	MAC-0004362
12	A10	0.633	0.65	0.265	0.219	0.629066	0.256619	Maybridge	BTB 05198	MAC-0004391
12	A11	0.639	0.647	0.277	0.213	0.630566	0.259619	Maybridge	BTB 05267	MAC-0004437
12	B2	0.629	0.635	0.267	0.217	0.619566	0.256619	Maybridge	BTB 04721	MAC-0004101
12	B3	0.642	0.642	0.273	0.226	0.629566	0.264119	Maybridge	BTB 04780	MAC-0004133
12	B4	0.631	0.635	0.273	0.205	0.620566	0.253619	Maybridge	BTB 04824	MAC-0004157
12	B5	0.618	0.619	0.266	0.204	0.606066	0.249619	Maybridge	BTB 04902	MAC-0004201
12	B6	0.625	0.639	0.27	0.206	0.619566	0.252619	Maybridge	BTB 04966	MAC-0004239
12	B7	0.639	0.637	0.277	0.188	0.625566	0.247119	Maybridge	BTB 05068	MAC-0004310
12	B8	0.641	0.631	0.273	0.188	0.623566	0.245119	Maybridge	BTB 05123	MAC-0004337
12	B9	0.605	0.622	0.268	0.199	0.601066	0.248119	Maybridge	BTB 05160	MAC-0004363
12	B10	0.647	0.64	0.278	0.198	0.631066	0.252619	Maybridge	BTB 05203	MAC-0004396
12	B11	0.621	0.631	0.28	0.191	0.613566	0.250119	Maybridge	BTB 05269	MAC-0004439
12	C2	0.629	0.633	0.265	0.223	0.618566	0.258619	Maybridge	BTB 04722	MAC-0004102
12	C3	0.627	0.63	0.268	0.224	0.616066	0.260619	Maybridge	BTB 04781	MAC-0004134
12	C4	0.624	0.627	0.266	0.217	0.613066	0.256119	Maybridge	BTB 04839	MAC-0004162
12	C5	0.616	0.616	0.265	0.215	0.603566	0.254619	Maybridge	BTB 04914	MAC-0004203
12	C6	0.606	0.614	0.248	0.209	0.597566	0.243119	Maybridge	BTB 04976	MAC-0153020
12	C7	0.623	0.615	0.266	0.206	0.606566	0.250619	Maybridge	BTB 05077	MAC-0004313
12	C8	0.603	0.612	0.255	0.197	0.595066	0.240619	Maybridge	BTB 05125	MAC-0004338
12	C9	0.625	0.62	0.271	0.2	0.610066	0.250119	Maybridge	BTB 05174	MAC-0004373
12	C10	0.631	0.627	0.274	0.192	0.616566	0.247619	Maybridge	BTB 05205	MAC-0004398
12	C11	0.632	0.629	0.272	0.185	0.618066	0.243119	Maybridge	BTB 05274	MAC-0004443
12	D2	0.638	0.635	0.259	0.224	0.624066	0.256119	Maybridge	BTB 04730	MAC-0004106
12	D3	0.628	0.618	0.262	0.219	0.610566	0.255119	Maybridge	BTB 04782	MAC-0004135
12	D4	0.638	0.636	0.265	0.213	0.624566	0.253619	Maybridge	BTB 04844	MAC-0004165
12	D5	0.628	0.631	0.262	0.2	0.617066	0.245619	Maybridge	BTB 04915	MAC-0004204
12	D6	0.642	0.639	0.271	0.202	0.628066	0.251119	Maybridge	BTB 04989	MAC-0004254
12	D7	0.632	0.63	0.266	0.196	0.618566	0.245619	Maybridge	BTB 05079	MAC-0004314
12	D8	0.648	0.622	0.267	0.195	0.622566	0.245619	Maybridge	BTB 05137	MAC-0004347
12	D9	0.629	0.618	0.259	0.19	0.611066	0.239119	Maybridge	BTB 05177	MAC-0004375
12	D10	0.626	0.637	0.273	0.188	0.619066	0.245119	Maybridge	BTB 05216	MAC-0004406
12	D11	0.64	0.642	0.277	0.178	0.628566	0.242119	Maybridge	BTB 05276	MAC-0004444
12	E2	0.628	0.627	0.262	0.221	0.615066	0.256119	Maybridge	BTB 04758	MAC-0004123
12	E3	0.621	0.609	0.253	0.214	0.602566	0.248119	Maybridge	BTB 04787	MAC-0000104
12	E4	0.612	0.591	0.246	0.207	0.589066	0.241119	Maybridge	BTB 04857	MAC-0004172
12	E5	0.622	0.621	0.249	0.194	0.609066	0.236119	Maybridge	BTB 04926	MAC-0004211
12	E6	0.611	0.627	0.254	0.208	0.606566	0.245619	Maybridge	BTB 05012	MAC-0004269
12	E7	0.638	0.631	0.254	0.207	0.622066	0.245119	Maybridge	BTB 05084	MAC-0004316
12	E8	0.624	0.625	0.25	0.206	0.612066	0.242619	Maybridge	BTB 05141	MAC-0004349
12	E9	0.624	0.633	0.254	0.208	0.616066	0.245619	Maybridge	BTB 05182	MAC-0004379
12	E10	0.622	0.626	0.264	0.19	0.611566	0.241619	Maybridge	BTB 05217	MAC-0004407
12	E11	0.635	0.624	0.272	0.182	0.617066	0.241619	Maybridge	BTB 05277	MAC-0004445
12	F2	0.642	0.643	0.251	0.209	0.630066	0.244619	Maybridge	BTB 04760	MAC-0004124
12	F3	0.631	0.631	0.249	0.217	0.618566	0.247619	Maybridge	BTB 04790	MAC-0004140
12	F4	0.623	0.63	0.247	0.209	0.614066	0.242619	Maybridge	BTB 04865	MAC-0004179
12	F5	0.615	0.608	0.253	0.214	0.599066	0.248119	Maybridge	BTB 04946	MAC-0000107
12	F6	0.64	0.637	0.255	0.214	0.626066	0.249119	Maybridge	BTB 05018	MAC-0004274
12	F7	0.624	0.615	0.257	0.21	0.607066	0.248119	Maybridge	BTB 05098	MAC-0004322
12	F8	0.626	0.627	0.259	0.203	0.614066	0.245619	Maybridge	BTB 05148	MAC-0004355
12	F9	0.636	0.633	0.257	0.196	0.622066	0.241119	Maybridge	BTB 05187	MAC-0004382
12	F10	0.633	0.631	0.257	0.186	0.619566	0.236119	Maybridge	BTB 05226	MAC-0004415
12	F11	0.638	0.636	0.265	0.187	0.624566	0.240619	Maybridge	BTB 05284	MAC-0004451
12	G2	0.639	0.637	0.252	0.197	0.625566	0.239119	Maybridge	BTB 04763	MAC-0004126
12	G3	0.605	0.611	0.229	0.203	0.595566	0.230619	Maybridge	BTB 04800	MAC-0153000
12	G4	0.613	0.607	0.239	0.208	0.597566	0.238119	Maybridge	BTB 04869	MAC-0004181
12	G5	0.626	0.623	0.247	0.204	0.612066	0.240119	Maybridge	BTB 04948	MAC-0004228
12	G6	0.616	0.613	0.251	0.229	0.602066	0.254619	Maybridge	BTB 05019	MAC-0004275
12	G7	0.636	0.626	0.251	0.216	0.618566	0.248119	Maybridge	BTB 05109	MAC-0004329
12	G8	0.622	0.624	0.254	0.214	0.610566	0.248619	Maybridge	BTB 05153	MAC-0004357
12	G9	0.624	0.619	0.252	0.228	0.609066	0.254619	Maybridge	BTB 05188	MAC-0004383
12	G10	0.649	0.636	0.267	0.183	0.630066	0.239619	Maybridge	BTB 05227	MAC-0004416
12	G11	0.637	0.641	0.266	0.181	0.626566	0.238119	Maybridge	BTB 05287	MAC-0004453
12	H2	0.666	0.673	0.261	0.234	0.657066	0.262119	Maybridge	BTB 04771	MAC-0004128
12	H3	0.664	0.658	0.26	0.228	0.648566	0.258619	Maybridge	BTB 04812	MAC-0004151
12	H4	0.654	0.646	0.253	0.212	0.637566	0.247119	Maybridge	BTB 04882	MAC-0004189
12	H5	0.66	0.656	0.262	0.211	0.645566	0.251119	Maybridge	BTB 04954	MAC-0004231
12	H6	0.66	0.663	0.259	0.243	0.649066	0.265619	Maybridge	BTB 05040	MAC-0004290
12	H7	0.671	0.664	0.275	0.234	0.655066	0.269119	Maybridge	BTB 05116	MAC-0004332
12	H8	0.656	0.658	0.273	0.225	0.644566	0.263619	Maybridge	BTB 05158	MAC-0004361
12	H9	0.663	0.666	0.272	0.214	0.652066	0.257619	Maybridge	BTB 05197	MAC-0153049
12	H10	0.668	0.669	0.275	0.184	0.656066	0.244119	Maybridge	BTB 05259	MAC-0004434
12	H11	0.685	0.673	0.281	0.187	0.666566	0.248619	Maybridge	BTB 05303	MAC-0004467
13	A2	0.609	0.595	0.237	0.245	0.593291	0.231269	Maybridge	BTB 05307	MAC-0004470
13	A3	0.634	0.638	0.245	0.258	0.627291	0.241769	Maybridge	BTB 05338	MAC-0004490
13	A4	0.634	0.639	0.244	0.259	0.627791	0.241769	Maybridge	BTB 05401	MAC-0004535
13	A5	0.634	0.641	0.245	0.246	0.628791	0.235769	Maybridge	BTB 05474	MAC-0000113
13	A6	0.621	0.633	0.233	0.226	0.618291	0.219769	Maybridge	BTB 05499	MAC-0004597
13	A7	0.647	0.645	0.254	0.242	0.637291	0.238269	Maybridge	BTB 05544	MAC-0004617
13	A8	0.637	0.643	0.252	0.242	0.631291	0.237269	Maybridge	BTB 05605	MAC-0004648
13	A9	0.636	0.641	0.253	0.272	0.629791	0.252769	Maybridge	BTB 05618	MAC-0004659
13	A10	0.636	0.655	0.264	0.305	0.636791	0.274769	Maybridge	BTB 05670	MAC-0004687
13	A11	0.628	0.62	0.261	0.329	0.615291	0.285269	Maybridge	BTB 05727	MAC-0004719
13	B2	0.628	0.631	0.266	0.275	0.620791	0.260769	Maybridge	BTB 05311	MAC-0153067
13	B3	0.635	0.641	0.27	0.279	0.629291	0.264769	Maybridge	BTB 05351	MAC-0004500
13	B4	0.629	0.627	0.274	0.279	0.619291	0.266769	Maybridge	BTB 05406	MAC-0004536
13	B5	0.616	0.628	0.275	0.278	0.613291	0.266769	Maybridge	BTB 05477	MAC-0004579
13	B6	0.625	0.635	0.276	0.277	0.621291	0.266769	Maybridge	BTB 05503	MAC-0004599
13	B7	0.628	0.63	0.281	0.277	0.620291	0.269269	Maybridge	BTB 05553	MAC-0004622
13	B8	0.635	0.633	0.274	0.281	0.625291	0.267769	Maybridge	BTB 05606	MAC-0004649
13	B9	0.616	0.627	0.256	0.283	0.612791	0.259769	Maybridge	BTB 05645	MAC-0004674
13	B10	0.641	0.638	0.249	0.295	0.630791	0.262269	Maybridge	BTB 05671	MAC-0004688
13	B11	0.627	0.638	0.258	0.32	0.623791	0.279269	Maybridge	BTB 05728	MAC-0004720
13	C2	0.615	0.615	0.265	0.271	0.606291	0.258269	Maybridge	BTB 05315	MAC-0004474
13	C3	0.62	0.623	0.267	0.273	0.612791	0.260269	Maybridge	BTB 05365	MAC-0004514
13	C4	0.59	0.592	0.235	0.228	0.582291	0.221769	Maybridge	BTB 05427	MAC-0004552
13	C5	0.608	0.612	0.271	0.266	0.601291	0.258769	Maybridge	BTB 05480	MAC-0004582
13	C6	0.612	0.626	0.263	0.266	0.610291	0.254769	Maybridge	AW 00927	MAC-0000015
13	C7	0.617	0.61	0.264	0.271	0.604791	0.257769	Maybridge	BTB 05562	MAC-0000116
13	C8	0.609	0.623	0.259	0.274	0.607291	0.256769	Maybridge	BTB 05610	MAC-0153116
13	C9	0.618	0.62	0.25	0.277	0.610291	0.253769	Maybridge	BTB 05647	MAC-0004676
13	C10	0.627	0.621	0.234	0.279	0.615291	0.246769	Maybridge	BTB 05678	MAC-0004694
13	C11	0.637	0.631	0.218	0.294	0.625291	0.246269	Maybridge	BTB 05729	MAC-0004721
13	D2	0.626	0.63	0.258	0.264	0.619291	0.251269	Maybridge	BTB 05316	MAC-0004475
13	D3	0.618	0.62	0.26	0.264	0.610291	0.252269	Maybridge	BTB 05386	MAC-0004524
13	D4	0.632	0.635	0.265	0.265	0.624791	0.255269	Maybridge	BTB 05438	MAC-0004560
13	D5	0.624	0.626	0.274	0.269	0.616291	0.261769	Maybridge	BTB 05490	MAC-0004590
13	D6	0.633	0.631	0.224	0.227	0.623291	0.215769	Maybridge	BTB 05522	MAC-0004604
13	D7	0.617	0.626	0.267	0.271	0.612791	0.259269	Maybridge	BTB 05566	MAC-0004630
13	D8	0.647	0.625	0.257	0.264	0.627291	0.250769	Maybridge	BTB 05611	MAC-0004652
13	D9	0.624	0.62	0.247	0.278	0.613291	0.252769	Maybridge	BTB 05659	MAC-0004680
13	D10	0.621	0.628	0.234	0.286	0.615791	0.250269	Maybridge	BTB 05684	MAC-0153133
13	D11	0.644	0.643	0.233	0.296	0.634791	0.254769	Maybridge	BTB 05746	MAC-0004728
13	E2	0.635	0.629	0.252	0.258	0.623291	0.245269	Maybridge	BTB 05321	MAC-0004478
13	E3	0.613	0.616	0.257	0.26	0.605791	0.248769	Maybridge	BTB 05387	MAC-0004525
13	E4	0.611	0.593	0.252	0.25	0.593291	0.241269	Maybridge	BTB 05444	MAC-0004563
13	E5	0.611	0.608	0.241	0.258	0.600791	0.239769	Maybridge	BTB 05491	MAC-0000114
13	E6	0.598	0.612	0.217	0.242	0.596291	0.219769	Maybridge	BTB 05527	MAC-0004608
13	E7	0.618	0.62	0.251	0.252	0.610291	0.241769	Maybridge	BTB 05584	MAC-0004635
13	E8	0.618	0.623	0.265	0.265	0.611791	0.255269	Maybridge	BTB 05612	MAC-0004653
13	E9	0.622	0.636	0.252	0.271	0.620291	0.251769	Maybridge	BTB 05660	MAC-0004681
13	E10	0.625	0.628	0.222	0.22	0.617791	0.211269	Maybridge	BTB 05689	MAC-0004699
13	E11	0.638	0.631	0.224	0.258	0.625791	0.231269	Maybridge	BTB 05754	MAC-0004734
13	F2	0.633	0.637	0.248	0.269	0.626291	0.248769	Maybridge	BTB 05325	MAC-0004481
13	F3	0.616	0.631	0.249	0.258	0.614791	0.243769	Maybridge	BTB 05391	MAC-0004528
13	F4	0.613	0.631	0.253	0.26	0.613291	0.246769	Maybridge	BTB 05447	MAC-0004564
13	F5	0.625	0.623	0.258	0.262	0.615291	0.250269	Maybridge	BTB 05492	MAC-0004592
13	F6	0.624	0.63	0.261	0.263	0.618291	0.252269	Maybridge	BTB 05532	MAC-0004609
13	F7	0.623	0.621	0.265	0.261	0.613291	0.253269	Maybridge	BTB 05596	MAC-0004643
13	F8	0.627	0.635	0.272	0.27	0.622291	0.261269	Maybridge	BTB 05613	MAC-0004654
13	F9	0.631	0.628	0.261	0.281	0.620791	0.261269	Maybridge	BTB 05662	MAC-0004683
13	F10	0.626	0.619	0.211	0.243	0.613791	0.217269	Maybridge	BTB 05715	MAC-0004710
13	F11	0.637	0.641	0.227	0.255	0.630291	0.231269	Maybridge	BTB 05759	MAC-0004736
13	G2	0.625	0.632	0.253	0.272	0.619791	0.252769	Maybridge	BTB 05330	MAC-0004483
13	G3	0.605	0.622	0.235	0.258	0.604791	0.236769	Maybridge	BTB 05392	MAC-0004529
13	G4	0.621	0.618	0.251	0.255	0.610791	0.243269	Maybridge	BTB 05464	MAC-0004572
13	G5	0.615	0.622	0.248	0.261	0.609791	0.244769	Maybridge	BTB 05494	MAC-0004593
13	G6	0.611	0.623	0.253	0.26	0.608291	0.246769	Maybridge	BTB 05538	MAC-0004613
13	G7	0.627	0.617	0.26	0.256	0.613291	0.248269	Maybridge	BTB 05600	MAC-0004645
13	G8	0.611	0.63	0.25	0.246	0.611791	0.238269	Maybridge	BTB 05614	MAC-0004655
13	G9	0.616	0.616	0.249	0.264	0.607291	0.246769	Maybridge	BTB 05666	MAC-0004684
13	G10	0.643	0.635	0.226	0.245	0.630291	0.225769	Maybridge	BTB 05723	MAC-0004715
13	G11	0.634	0.639	0.224	0.239	0.627791	0.221769	Maybridge	BTB 05765	MAC-0004739
13	H2	0.652	0.663	0.254	0.273	0.648791	0.253769	Maybridge	BTB 05336	MAC-0004488
13	H3	0.66	0.655	0.253	0.259	0.648791	0.246269	Maybridge	BTB 05399	MAC-0000111
13	H4	0.641	0.65	0.248	0.257	0.636791	0.242769	Maybridge	BTB 05465	MAC-0004573
13	H5	0.649	0.654	0.245	0.254	0.642791	0.239769	Maybridge	BTB 05495	MAC-0004594
13	H6	0.651	0.653	0.263	0.246	0.643291	0.244769	Maybridge	BTB 05541	MAC-0004615
13	H7	0.655	0.66	0.259	0.265	0.648791	0.252269	Maybridge	BTB 05604	MAC-0004647
13	H8	0.643	0.653	0.243	0.27	0.639291	0.246769	Maybridge	BTB 05615	MAC-0004656
13	H9	0.649	0.652	0.256	0.266	0.641791	0.251269	Maybridge	BTB 05667	MAC-0004685
13	H10	0.662	0.666	0.267	0.261	0.655291	0.254269	Maybridge	BTB 05726	MAC-0004718
13	H11	0.663	0.655	0.252	0.276	0.650291	0.254269	Maybridge	BTB 05771	MAC-0004744
14	A2	0.621	0.597	0.171	0.178	0.614353	0.158107	Maybridge	BTB 05772	MAC-0004745
14	A3	0.633	0.631	0.238	0.239	0.637353	0.222107	Maybridge	BTB 05835	MAC-0004774
14	A4	0.625	0.628	0.236	0.238	0.631853	0.220607	Maybridge	BTB 05875	MAC-0004802
14	A5	0.639	0.634	0.24	0.234	0.641853	0.220607	Maybridge	BTB 05917	MAC-0004827
14	A6	0.626	0.617	0.247	0.236	0.626853	0.225107	Maybridge	BTB 05944	MAC-0153178
14	A7	0.634	0.636	0.244	0.241	0.640353	0.226107	Maybridge	BTB 06010	MAC-0004884
14	A8	0.636	0.626	0.245	0.232	0.636353	0.222107	Maybridge	BTB 06054	MAC-0004902
14	A9	0.625	0.613	0.255	0.251	0.624353	0.236607	Maybridge	BTB 06099	MAC-0004929
14	A10	0.621	0.632	0.262	0.264	0.631853	0.246607	Maybridge	BTB 06139	MAC-0004954
14	A11	0.643	0.616	0.265	0.262	0.634853	0.247107	Maybridge	BTB 06204	MAC-0153218
14	B2	0.627	0.615	0.267	0.269	0.626353	0.251607	Maybridge	BTB 05775	MAC-0004747
14	B3	0.627	0.617	0.273	0.273	0.627353	0.256607	Maybridge	BTB 05836	MAC-0004775
14	B4	0.622	0.61	0.273	0.271	0.621353	0.255607	Maybridge	BTB 05878	MAC-0004804
14	B5	0.608	0.61	0.268	0.272	0.614353	0.253607	Maybridge	BTB 05918	MAC-0004828
14	B6	0.615	0.607	0.271	0.273	0.616353	0.255607	Maybridge	BTB 05946	MAC-0004850
14	B7	0.616	0.611	0.273	0.274	0.618853	0.257107	Maybridge	BTB 06020	MAC-0004890
14	B8	0.628	0.607	0.28	0.273	0.622853	0.260107	Maybridge	BTB 06057	MAC-0004904
14	B9	0.6	0.598	0.272	0.268	0.604353	0.253607	Maybridge	BTB 06110	MAC-0004936
14	B10	0.632	0.62	0.269	0.266	0.631353	0.251107	Maybridge	BTB 06147	MAC-0004957
14	B11	0.611	0.617	0.268	0.273	0.619353	0.254107	Maybridge	BTB 06234	MAC-0153219
14	C2	0.611	0.612	0.258	0.258	0.616853	0.241607	Maybridge	BTB 05782	MAC-0004749
14	C3	0.616	0.605	0.267	0.27	0.615853	0.252107	Maybridge	BTB 05845	MAC-0004783
14	C4	0.607	0.603	0.267	0.268	0.610353	0.251107	Maybridge	BTB 05880	MAC-0004806
14	C5	0.608	0.593	0.266	0.263	0.605853	0.248107	Maybridge	BTB 05923	MAC-0004832
14	C6	0.6	0.603	0.264	0.267	0.606853	0.249107	Maybridge	BTB 05948	MAC-0004851
14	C7	0.612	0.588	0.262	0.261	0.605353	0.245107	Maybridge	BTB 06026	MAC-0153188
14	C8	0.601	0.6	0.238	0.242	0.605853	0.223607	Maybridge	BTB 06065	MAC-0004910
14	C9	0.605	0.601	0.265	0.257	0.608353	0.244607	Maybridge	BTB 06111	MAC-0004937
14	C10	0.622	0.609	0.271	0.27	0.620853	0.254107	Maybridge	BTB 06157	MAC-0004959
14	C11	0.614	0.604	0.267	0.267	0.614353	0.250607	Maybridge	BTB 06240	MAC-0005001
14	D2	0.622	0.614	0.26	0.261	0.623353	0.244107	Maybridge	BTB 05808	MAC-0004759
14	D3	0.615	0.613	0.265	0.26	0.619353	0.246107	Maybridge	BTB 05851	MAC-0004787
14	D4	0.624	0.614	0.27	0.274	0.624353	0.255607	Maybridge	BTB 05881	MAC-0004807
14	D5	0.607	0.603	0.265	0.27	0.610353	0.251107	Maybridge	BTB 05924	MAC-0004833
14	D6	0.627	0.618	0.273	0.279	0.627853	0.259607	Maybridge	BTB 05957	MAC-0004857
14	D7	0.611	0.602	0.271	0.271	0.611853	0.254607	Maybridge	BTB 06034	MAC-0004895
14	D8	0.633	0.606	0.262	0.254	0.624853	0.241607	Maybridge	BTB 06069	MAC-0004912
14	D9	0.605	0.586	0.272	0.269	0.600853	0.254107	Maybridge	BTB 06112	MAC-0004938
14	D10	0.618	0.611	0.269	0.264	0.619853	0.250107	Maybridge	BTB 06158	MAC-0004960
14	D11	0.632	0.622	0.267	0.268	0.632353	0.251107	Maybridge	BTB 06261	MAC-0005011
14	E2	0.621	0.619	0.258	0.255	0.625353	0.240107	Maybridge	BTB 05811	MAC-0004761
14	E3	0.614	0.61	0.261	0.262	0.617353	0.245107	Maybridge	BTB 05857	MAC-0004791
14	E4	0.603	0.575	0.26	0.258	0.594353	0.242607	Maybridge	BTB 05897	MAC-0004815
14	E5	0.61	0.603	0.259	0.262	0.611853	0.244107	Maybridge	BTB 05928	MAC-0004835
14	E6	0.595	0.606	0.26	0.265	0.605853	0.246107	Maybridge	BTB 05964	MAC-0004862
14	E7	0.586	0.593	0.262	0.269	0.594853	0.249107	Maybridge	BTB 06039	MAC-0004896
14	E8	0.608	0.603	0.257	0.265	0.610853	0.244607	Maybridge	BTB 06074	MAC-0004914
14	E9	0.61	0.61	0.258	0.255	0.615353	0.240107	Maybridge	BTB 06125	MAC-0004944
14	E10	0.611	0.606	0.269	0.269	0.613853	0.252607	Maybridge	BTB 06160	MAC-0004962
14	E11	0.614	0.604	0.26	0.262	0.614353	0.244607	Maybridge	BTB 06265	MAC-0153222
14	F2	0.594	0.6	0.247	0.247	0.602353	0.230607	Maybridge	BTB 05815	MAC-0004763
14	F3	0.619	0.617	0.249	0.258	0.623353	0.237107	Maybridge	BTB 05859	MAC-0004792
14	F4	0.61	0.611	0.255	0.266	0.615853	0.244107	Maybridge	BTB 05899	MAC-0004816
14	F5	0.616	0.601	0.271	0.266	0.613853	0.252107	Maybridge	BTB 05932	MAC-0004838
14	F6	0.624	0.619	0.26	0.267	0.626853	0.247107	Maybridge	BTB 05967	MAC-0004865
14	F7	0.612	0.608	0.262	0.266	0.615353	0.247607	Maybridge	BTB 06045	MAC-0004897
14	F8	0.614	0.61	0.26	0.26	0.617353	0.243607	Maybridge	BTB 06086	MAC-0004921
14	F9	0.621	0.611	0.265	0.266	0.621353	0.249107	Maybridge	BTB 06126	MAC-0004945
14	F10	0.626	0.604	0.266	0.265	0.620353	0.249107	Maybridge	BTB 06164	MAC-0004963
14	F11	0.621	0.607	0.272	0.271	0.619353	0.255107	Maybridge	BTB 06267	MAC-0005015
14	G2	0.626	0.617	0.261	0.264	0.626853	0.246107	Maybridge	BTB 05818	MAC-0004766
14	G3	0.606	0.597	0.26	0.263	0.606853	0.245107	Maybridge	BTB 05862	MAC-0004793
14	G4	0.622	0.596	0.255	0.257	0.614353	0.239607	Maybridge	BTB 05908	MAC-0004818
14	G5	0.607	0.603	0.254	0.26	0.610353	0.240607	Maybridge	BTB 05935	MAC-0004841
14	G6	0.616	0.609	0.256	0.262	0.617853	0.242607	Maybridge	BTB 05973	MAC-0153184
14	G7	0.615	0.6	0.272	0.267	0.612853	0.253107	Maybridge	BTB 06046	MAC-0004898
14	G8	0.602	0.612	0.249	0.261	0.612353	0.238607	Maybridge	BTB 06091	MAC-0004924
14	G9	0.602	0.595	0.257	0.262	0.603853	0.243107	Maybridge	BTB 06132	MAC-0004950
14	G10	0.627	0.608	0.257	0.272	0.622853	0.248107	Maybridge	BTB 06188	MAC-0004977
14	G11	0.618	0.607	0.262	0.251	0.617853	0.240107	Maybridge	BTB 06269	MAC-0005016
14	H2	0.651	0.635	0.255	0.262	0.648353	0.242107	Maybridge	BTB 05824	MAC-0153153
14	H3	0.641	0.623	0.282	0.278	0.637353	0.263607	Maybridge	BTB 05869	MAC-0000123
14	H4	0.632	0.615	0.279	0.277	0.628853	0.261607	Maybridge	BTB 05911	MAC-0004821
14	H5	0.636	0.608	0.255	0.269	0.627353	0.245607	Maybridge	BTB 05939	MAC-0004844
14	H6	0.646	0.637	0.262	0.268	0.646853	0.248607	Maybridge	BTB 06003	MAC-0004879
14	H7	0.649	0.611	0.269	0.276	0.635353	0.256107	Maybridge	BTB 06049	MAC-0004900
14	H8	0.636	0.618	0.27	0.274	0.632353	0.255607	Maybridge	BTB 06096	MAC-0004928
14	H9	0.636	0.61	0.265	0.278	0.628353	0.255107	Maybridge	BTB 06133	MAC-0004951
14	H10	0.654	0.631	0.278	0.289	0.647853	0.267107	Maybridge	BTB 06198	MAC-0004984
14	H11	0.636	0.614	0.284	0.29	0.630353	0.270607	Maybridge	BTB 06281	MAC-0005017
15	A2	0.641	0.637	0.248	0.252	0.635741	0.251057	Maybridge	BTB 06283	MAC-0005019
15	A3	0.63	0.625	0.251	0.257	0.624241	0.255057	Maybridge	BTB 06377	MAC-0005055
15	A4	0.629	0.621	0.247	0.254	0.621741	0.251557	Maybridge	BTB 06467	MAC-0005093
15	A5	0.645	0.637	0.251	0.253	0.637741	0.253057	Maybridge	BTB 06524	MAC-0005121
15	A6	0.627	0.631	0.26	0.262	0.625741	0.262057	Maybridge	BTB 06579	MAC-0005155
15	A7	0.637	0.626	0.258	0.27	0.628241	0.265057	Maybridge	BTB 06666	MAC-0005194
15	A8	0.639	0.631	0.252	0.264	0.631741	0.259057	Maybridge	BTB 06734	MAC-0005222
15	A9	0.625	0.624	0.231	0.261	0.621241	0.247057	Maybridge	BTB 06815	MAC-0005263
15	A10	0.632	0.645	0.212	0.216	0.635241	0.215057	Maybridge	BTB 06922	MAC-0005319
15	A11	0.652	0.643	0.225	0.236	0.644241	0.231557	Maybridge	BTB 06991	MAC-0005371
15	B2	0.624	0.631	0.252	0.276	0.624241	0.265057	Maybridge	BTB 06286	MAC-0005022
15	B3	0.633	0.64	0.251	0.281	0.633241	0.267057	Maybridge	BTB 06379	MAC-0153235
15	B4	0.628	0.631	0.243	0.283	0.626241	0.264057	Maybridge	BTB 06469	MAC-0005095
15	B5	0.614	0.628	0.239	0.274	0.617741	0.257557	Maybridge	BTB 06532	MAC-0153251
15	B6	0.615	0.638	0.237	0.279	0.623241	0.259057	Maybridge	BTB 06584	MAC-0005159
15	B7	0.618	0.624	0.205	0.235	0.617741	0.221057	Maybridge	BTB 06669	MAC-0005196
15	B8	0.619	0.615	0.211	0.248	0.613741	0.230557	Maybridge	BTB 06743	MAC-0005227
15	B9	0.598	0.615	0.199	0.245	0.603241	0.223057	Maybridge	BTB 06822	MAC-0005268
15	B10	0.621	0.624	0.203	0.208	0.619241	0.206557	Maybridge	BTB 06934	MAC-0005328
15	B11	0.607	0.623	0.193	0.2	0.611741	0.197557	Maybridge	BTB 07015	MAC-0005379
15	C2	0.612	0.62	0.256	0.261	0.612741	0.259557	Maybridge	BTB 06291	MAC-0005024
15	C3	0.616	0.628	0.259	0.279	0.618741	0.270057	Maybridge	BTB 06396	MAC-0005064
15	C4	0.613	0.629	0.259	0.268	0.617741	0.264557	Maybridge	BTB 06474	MAC-0005099
15	C5	0.611	0.616	0.25	0.271	0.610241	0.261557	Maybridge	BTB 06539	MAC-0005131
15	C6	0.607	0.626	0.242	0.279	0.613241	0.261557	Maybridge	BTB 06593	MAC-0005166
15	C7	0.605	0.608	0.217	0.261	0.603241	0.240057	Maybridge	BTB 06682	MAC-0005202
15	C8	0.604	0.618	0.22	0.227	0.607741	0.224557	Maybridge	BTB 06747	MAC-0005229
15	C9	0.609	0.618	0.212	0.209	0.610241	0.211557	Maybridge	BTB 06828	MAC-0005273
15	C10	0.615	0.616	0.21	0.188	0.612241	0.200057	Maybridge	BTB 06940	MAC-0005331
15	C11	0.618	0.617	0.204	0.189	0.614241	0.197557	Maybridge	BTB 07021	MAC-0005383
15	D2	0.627	0.632	0.259	0.275	0.626241	0.268057	Maybridge	BTB 06307	MAC-0005027
15	D3	0.622	0.622	0.265	0.276	0.618741	0.271557	Maybridge	BTB 06399	MAC-0153237
15	D4	0.623	0.632	0.254	0.28	0.624241	0.268057	Maybridge	BTB 06478	MAC-0005103
15	D5	0.622	0.628	0.251	0.255	0.621741	0.254057	Maybridge	BTB 06543	MAC-0005134
15	D6	0.635	0.641	0.283	0.266	0.634741	0.275557	Maybridge	BTB 06613	MAC-0005168
15	D7	0.609	0.612	0.217	0.255	0.607241	0.237057	Maybridge	BTB 06689	MAC-0005204
15	D8	0.633	0.619	0.261	0.227	0.622741	0.245057	Maybridge	BTB 06748	MAC-0000140
15	D9	0.617	0.614	0.245	0.2	0.612241	0.223557	Maybridge	BTB 06844	MAC-0153285
15	D10	0.613	0.618	0.237	0.192	0.612241	0.215557	Maybridge	BTB 06945	MAC-0005333
15	D11	0.619	0.626	0.244	0.186	0.619241	0.216057	Maybridge	BTB 07031	MAC-0153301
15	E2	0.626	0.631	0.259	0.27	0.625241	0.265557	Maybridge	BTB 06317	MAC-0005029
15	E3	0.615	0.612	0.261	0.258	0.610241	0.260557	Maybridge	BTB 06429	MAC-0005082
15	E4	0.607	0.589	0.266	0.271	0.594741	0.269557	Maybridge	BTB 06486	MAC-0005108
15	E5	0.612	0.62	0.259	0.245	0.612741	0.253057	Maybridge	BTB 06545	MAC-0005136
15	E6	0.594	0.618	0.254	0.233	0.602741	0.244557	Maybridge	BTB 06614	MAC-0005169
15	E7	0.611	0.626	0.263	0.248	0.615241	0.256557	Maybridge	BTB 06690	MAC-0005205
15	E8	0.607	0.614	0.266	0.222	0.607241	0.245057	Maybridge	BTB 06752	MAC-0005231
15	E9	0.613	0.63	0.269	0.217	0.618241	0.244057	Maybridge	BTB 06852	MAC-0153286
15	E10	0.616	0.624	0.261	0.195	0.616741	0.229057	Maybridge	BTB 06946	MAC-0005334
15	E11	0.623	0.623	0.257	0.198	0.619741	0.228557	Maybridge	BTB 07042	MAC-0005388
15	F2	0.629	0.634	0.26	0.276	0.628241	0.269057	Maybridge	BTB 06328	MAC-0005038
15	F3	0.618	0.623	0.263	0.251	0.617241	0.258057	Maybridge	BTB 06430	MAC-0005083
15	F4	0.608	0.626	0.271	0.276	0.613741	0.274557	Maybridge	BTB 06496	MAC-0153247
15	F5	0.621	0.617	0.265	0.256	0.615741	0.261557	Maybridge	BTB 06548	MAC-0005139
15	F6	0.618	0.632	0.263	0.265	0.621741	0.265057	Maybridge	BTB 06617	MAC-0005172
15	F7	0.612	0.617	0.267	0.224	0.611241	0.246557	Maybridge	BTB 06697	MAC-0005210
15	F8	0.612	0.614	0.275	0.222	0.609741	0.249557	Maybridge	BTB 06772	MAC-0005246
15	F9	0.623	0.625	0.266	0.189	0.620741	0.228557	Maybridge	BTB 06865	MAC-0005290
15	F10	0.622	0.623	0.269	0.19	0.619241	0.230557	Maybridge	BTB 06977	MAC-0005358
15	F11	0.627	0.628	0.254	0.196	0.624241	0.226057	Maybridge	BTB 07048	MAC-0005390
15	G2	0.626	0.629	0.257	0.246	0.624241	0.252557	Maybridge	BTB 06361	MAC-0005049
15	G3	0.607	0.62	0.246	0.249	0.610241	0.248557	Maybridge	BTB 06436	MAC-0005085
15	G4	0.609	0.607	0.266	0.256	0.604741	0.262057	Maybridge	BTB 06499	MAC-0005112
15	G5	0.616	0.628	0.254	0.239	0.618741	0.247557	Maybridge	BTB 06554	MAC-0005143
15	G6	0.606	0.613	0.258	0.24	0.606241	0.250057	Maybridge	BTB 06638	MAC-0005182
15	G7	0.62	0.613	0.268	0.223	0.613241	0.246557	Maybridge	BTB 06724	MAC-0005218
15	G8	0.605	0.618	0.262	0.212	0.608241	0.238057	Maybridge	BTB 06803	MAC-0000141
15	G9	0.606	0.607	0.258	0.196	0.603241	0.228057	Maybridge	BTB 06873	MAC-0005295
15	G10	0.629	0.621	0.259	0.204	0.621741	0.232557	Maybridge	BTB 06980	MAC-0005361
15	G11	0.62	0.627	0.242	0.194	0.620241	0.219057	Maybridge	BTB 07062	MAC-0005399
15	H2	0.666	0.663	0.269	0.267	0.661241	0.269057	Maybridge	BTB 06366	MAC-0005051
15	H3	0.649	0.662	0.267	0.27	0.652241	0.269557	Maybridge	BTB 06462	MAC-0005091
15	H4	0.641	0.649	0.269	0.257	0.641741	0.264057	Maybridge	BTB 06521	MAC-0005119
15	H5	0.65	0.644	0.265	0.26	0.643741	0.263557	Maybridge	BTB 06558	MAC-0005145
15	H6	0.652	0.661	0.272	0.254	0.653241	0.264057	Maybridge	BTB 06658	MAC-0005190
15	H7	0.656	0.652	0.268	0.228	0.650741	0.249057	Maybridge	BTB 06729	MAC-0005220
15	H8	0.648	0.647	0.269	0.232	0.644241	0.251557	Maybridge	BTB 06812	MAC-0005262
15	H9	0.653	0.648	0.265	0.216	0.647241	0.241557	Maybridge	BTB 06908	MAC-0005307
15	H10	0.665	0.656	0.258	0.21	0.657241	0.235057	Maybridge	BTB 06984	MAC-0005365
15	H11	0.671	0.667	0.238	0.199	0.665741	0.219557	Maybridge	BTB 07066	MAC-0005401
16	A2	0.643	0.637	0.253	0.241	0.631278	0.233057	Maybridge	BTB 07086	MAC-0005409
16	A3	0.638	0.642	0.262	0.246	0.631278	0.240057	Maybridge	BTB 07136	MAC-0005439
16	A4	0.632	0.618	0.272	0.238	0.616278	0.241057	Maybridge	BTB 07201	MAC-0005472
16	A5	0.644	0.633	0.293	0.243	0.629778	0.254057	Maybridge	BTB 07263	MAC-0005507
16	A6	0.626	0.628	0.331	0.243	0.618278	0.273057	Maybridge	BTB 07293	MAC-0005521
16	A7	0.632	0.64	0.352	0.255	0.627278	0.289557	Maybridge	BTB 07321	MAC-0005540
16	A8	0.619	0.616	0.351	0.239	0.608778	0.281057	Maybridge	BTB 07378	MAC-0005563
16	A9	0.621	0.631	0.345	0.266	0.617278	0.291557	Maybridge	BTB 07491	MAC-0005610
16	A10	0.61	0.637	0.373	0.269	0.614778	0.307057	Maybridge	BTB 07554	MAC-0005643
16	A11	0.644	0.644	0.335	0.263	0.635278	0.285057	Maybridge	BTB 07620	MAC-0005688
16	B2	0.63	0.638	0.275	0.263	0.625278	0.255057	Maybridge	BTB 07099	MAC-0005418
16	B3	0.634	0.645	0.275	0.266	0.630778	0.256557	Maybridge	BTB 07161	MAC-0005447
16	B4	0.626	0.632	0.261	0.259	0.620278	0.246057	Maybridge	BTB 07221	MAC-0005481
16	B5	0.619	0.633	0.291	0.271	0.617278	0.267057	Maybridge	BTB 07264	MAC-0005508
16	B6	0.624	0.632	0.311	0.278	0.619278	0.280557	Maybridge	BTB 07299	MAC-0005525
16	B7	0.636	0.633	0.318	0.272	0.625778	0.281057	Maybridge	BTB 07326	MAC-0005542
16	B8	0.63	0.63	0.341	0.27	0.621278	0.291557	Maybridge	BTB 07386	MAC-0005567
16	B9	0.615	0.626	0.325	0.273	0.611778	0.285057	Maybridge	BTB 07493	MAC-0005612
16	B10	0.637	0.636	0.323	0.274	0.627778	0.284557	Maybridge	BTB 07579	MAC-0005656
16	B11	0.609	0.626	0.288	0.276	0.608778	0.268057	Maybridge	BTB 07636	MAC-0005696
16	C2	0.62	0.632	0.274	0.262	0.617278	0.254057	Maybridge	BTB 07101	MAC-0005420
16	C3	0.627	0.63	0.271	0.26	0.619778	0.251557	Maybridge	BTB 07164	MAC-0153316
16	C4	0.611	0.624	0.279	0.264	0.608778	0.257557	Maybridge	BTB 07222	MAC-0005482
16	C5	0.612	0.619	0.284	0.262	0.606778	0.259057	Maybridge	BTB 07269	MAC-0005512
16	C6	0.609	0.621	0.297	0.265	0.606278	0.267057	Maybridge	BTB 07305	MAC-0005530
16	C7	0.62	0.618	0.292	0.262	0.610278	0.263057	Maybridge	BTB 07328	MAC-0005544
16	C8	0.599	0.6	0.292	0.27	0.590778	0.267057	Maybridge	BTB 07403	MAC-0005568
16	C9	0.612	0.61	0.274	0.261	0.602278	0.253557	Maybridge	BTB 07497	MAC-0005616
16	C10	0.635	0.633	0.243	0.272	0.625278	0.243557	Maybridge	BTB 07593	MAC-0153372
16	C11	0.624	0.625	0.231	0.275	0.615778	0.239057	Maybridge	BTB 07648	MAC-0005706
16	D2	0.631	0.639	0.269	0.255	0.626278	0.248057	Maybridge	BTB 07103	MAC-0005422
16	D3	0.632	0.633	0.271	0.249	0.623778	0.246057	Maybridge	BTB 07179	MAC-0005459
16	D4	0.635	0.642	0.282	0.266	0.629778	0.260057	Maybridge	BTB 07232	MAC-0005488
16	D5	0.629	0.627	0.273	0.26	0.619278	0.252557	Maybridge	BTB 07272	MAC-0005514
16	D6	0.637	0.64	0.306	0.271	0.629778	0.274557	Maybridge	BTB 07306	MAC-0005531
16	D7	0.62	0.634	0.303	0.262	0.618278	0.268557	Maybridge	BTB 07340	MAC-0153349
16	D8	0.645	0.629	0.275	0.243	0.628278	0.245057	Maybridge	BTB 07404	MAC-0005569
16	D9	0.623	0.618	0.261	0.251	0.611778	0.242057	Maybridge	BTB 07510	MAC-0005622
16	D10	0.627	0.631	0.234	0.27	0.620278	0.238057	Maybridge	BTB 07596	MAC-0005670
16	D11	0.634	0.636	0.232	0.274	0.626278	0.239057	Maybridge	BTB 07658	MAC-0005710
16	E2	0.631	0.635	0.251	0.254	0.624278	0.238557	Maybridge	BTB 07105	MAC-0005423
16	E3	0.62	0.622	0.274	0.257	0.612278	0.251557	Maybridge	BTB 07181	MAC-0005461
16	E4	0.607	0.596	0.27	0.252	0.592778	0.247057	Maybridge	BTB 07238	MAC-0005492
16	E5	0.612	0.615	0.262	0.249	0.604778	0.241557	Maybridge	BTB 07274	MAC-0153334
16	E6	0.606	0.621	0.287	0.262	0.604778	0.260557	Maybridge	BTB 07307	MAC-0005532
16	E7	0.616	0.629	0.271	0.238	0.613778	0.240557	Maybridge	BTB 07344	MAC-0005547
16	E8	0.617	0.625	0.26	0.256	0.612278	0.244057	Maybridge	BTB 07411	MAC-0153358
16	E9	0.62	0.63	0.242	0.252	0.616278	0.233057	Maybridge	BTB 07522	MAC-0000151
16	E10	0.613	0.625	0.221	0.252	0.610278	0.222557	Maybridge	BTB 07601	MAC-0005674
16	E11	0.626	0.621	0.223	0.266	0.614778	0.230557	Maybridge	BTB 07659	MAC-0005711
16	F2	0.633	0.639	0.241	0.246	0.627278	0.229557	Maybridge	BTB 07119	MAC-0153311
16	F3	0.621	0.631	0.233	0.244	0.617278	0.224557	Maybridge	BTB 07183	MAC-0005463
16	F4	0.617	0.635	0.28	0.268	0.617278	0.260057	Maybridge	BTB 07253	MAC-0005501
16	F5	0.625	0.623	0.267	0.25	0.615278	0.244557	Maybridge	BTB 07277	MAC-0153335
16	F6	0.626	0.63	0.268	0.253	0.619278	0.246557	Maybridge	BTB 07311	MAC-0005534
16	F7	0.611	0.614	0.279	0.239	0.603778	0.245057	Maybridge	BTB 07345	MAC-0005548
16	F8	0.625	0.626	0.267	0.249	0.616778	0.244057	Maybridge	BTB 07418	MAC-0005576
16	F9	0.625	0.624	0.253	0.237	0.615778	0.231057	Maybridge	BTB 07533	MAC-0153367
16	F10	0.628	0.626	0.232	0.247	0.618278	0.225557	Maybridge	BTB 07602	MAC-0153375
16	F11	0.63	0.628	0.241	0.269	0.620278	0.241057	Maybridge	BTB 07666	MAC-0005712
16	G2	0.631	0.641	0.251	0.258	0.627278	0.240557	Maybridge	BTB 07130	MAC-0005436
16	G3	0.597	0.616	0.231	0.239	0.597778	0.221057	Maybridge	BTB 07187	MAC-0153320
16	G4	0.609	0.613	0.229	0.242	0.602278	0.221557	Maybridge	BTB 07256	MAC-0005504
16	G5	0.615	0.613	0.246	0.26	0.605278	0.239057	Maybridge	BTB 07283	MAC-0005517
16	G6	0.613	0.622	0.278	0.241	0.608778	0.245557	Maybridge	BTB 07315	MAC-0000149
16	G7	0.629	0.617	0.264	0.243	0.614278	0.239557	Maybridge	BTB 07369	MAC-0005560
16	G8	0.606	0.623	0.245	0.237	0.605778	0.227057	Maybridge	BTB 07425	MAC-0005581
16	G9	0.606	0.612	0.253	0.245	0.600278	0.235057	Maybridge	BTB 07545	MAC-0005635
16	G10	0.637	0.631	0.225	0.249	0.625278	0.223057	Maybridge	BTB 07611	MAC-0005680
16	G11	0.627	0.634	0.239	0.262	0.621778	0.236557	Maybridge	BTB 07673	MAC-0153384
16	H2	0.664	0.677	0.255	0.267	0.661778	0.247057	Maybridge	BTB 07135	MAC-0005438
16	H3	0.658	0.664	0.255	0.259	0.652278	0.243057	Maybridge	BTB 07195	MAC-0005470
16	H4	0.635	0.65	0.246	0.256	0.633778	0.237057	Maybridge	BTB 07261	MAC-0153329
16	H5	0.641	0.65	0.245	0.249	0.636778	0.233057	Maybridge	BTB 07289	MAC-0005519
16	H6	0.645	0.668	0.266	0.261	0.647778	0.249557	Maybridge	BTB 07317	MAC-0005538
16	H7	0.657	0.651	0.272	0.254	0.645278	0.249057	Maybridge	BTB 07373	MAC-0005562
16	H8	0.653	0.657	0.277	0.261	0.646278	0.255057	Maybridge	BTB 07462	MAC-0005598
16	H9	0.648	0.65	0.281	0.258	0.640278	0.255557	Maybridge	BTB 07548	MAC-0005638
16	H10	0.666	0.667	0.269	0.274	0.657778	0.257557	Maybridge	BTB 07618	MAC-0005687
16	H11	0.675	0.666	0.27	0.27	0.661778	0.256057	Maybridge	BTB 07695	MAC-0005727
17	A2	0.638	0.645	0.25	0.253	0.630941	0.236694	Maybridge	BTB 07697	MAC-0005728
17	A3	0.653	0.642	0.251	0.259	0.636941	0.240194	Maybridge	BTB 07774	MAC-0005781
17	A4	0.629	0.635	0.253	0.271	0.621441	0.247194	Maybridge	BTB 07819	MAC-0005799
17	A5	0.625	0.627	0.257	0.276	0.615441	0.251694	Maybridge	BTB 07886	MAC-0153410
17	A6	0.63	0.638	0.26	0.296	0.623441	0.263194	Maybridge	BTB 07917	MAC-0153418
17	A7	0.631	0.642	0.258	0.294	0.625941	0.261194	Maybridge	BTB 07971	MAC-0005872
17	A8	0.629	0.627	0.255	0.274	0.617441	0.249694	Maybridge	BTB 08055	MAC-0005890
17	A9	0.626	0.627	0.271	0.28	0.615941	0.260694	Maybridge	BTB 08147	MAC-0153442
17	A10	0.641	0.641	0.276	0.272	0.630441	0.259194	Maybridge	BTB 08186	MAC-0153450
17	A11	0.644	0.654	0.274	0.257	0.638441	0.250694	Maybridge	BTB 08252	MAC-0000159
17	B2	0.644	0.646	0.277	0.273	0.634441	0.260194	Maybridge	BTB 07719	MAC-0005745
17	B3	0.638	0.642	0.274	0.276	0.629441	0.260194	Maybridge	BTB 07775	MAC-0153395
17	B4	0.631	0.633	0.286	0.284	0.621441	0.270194	Maybridge	BTB 07822	MAC-0000153
17	B5	0.596	0.597	0.285	0.283	0.585941	0.269194	Maybridge	BTB 07890	MAC-0005830
17	B6	0.629	0.624	0.279	0.276	0.615941	0.262694	Maybridge	BTB 07918	MAC-0005848
17	B7	0.62	0.638	0.279	0.28	0.618441	0.264694	Maybridge	BTB 07972	MAC-0153427
17	B8	0.63	0.619	0.281	0.269	0.613941	0.260194	Maybridge	BTB 08064	MAC-0005895
17	B9	0.631	0.631	0.278	0.266	0.620441	0.257194	Maybridge	BTB 08149	MAC-0153443
17	B10	0.633	0.64	0.277	0.257	0.625941	0.252194	Maybridge	BTB 08196	MAC-0005973
17	B11	0.625	0.63	0.272	0.251	0.616941	0.246694	Maybridge	BTB 08264	MAC-0006009
17	C2	0.624	0.623	0.273	0.269	0.612941	0.256194	Maybridge	BTB 07733	MAC-0005751
17	C3	0.625	0.63	0.278	0.268	0.616941	0.258194	Maybridge	BTB 07781	MAC-0005782
17	C4	0.617	0.622	0.275	0.268	0.608941	0.256694	Maybridge	BTB 07833	MAC-0005804
17	C5	0.622	0.625	0.267	0.263	0.612941	0.250194	Maybridge	BTB 07901	MAC-0005836
17	C6	0.62	0.621	0.273	0.265	0.609941	0.254194	Maybridge	BTB 07942	MAC-0005859
17	C7	0.628	0.621	0.28	0.268	0.613941	0.259194	Maybridge	BTB 07974	MAC-0005874
17	C8	0.617	0.613	0.277	0.27	0.604441	0.258694	Maybridge	BTB 08068	MAC-0005899
17	C9	0.62	0.62	0.271	0.258	0.609441	0.249694	Maybridge	BTB 08156	MAC-0005943
17	C10	0.634	0.631	0.271	0.26	0.621941	0.250694	Maybridge	BTB 08201	MAC-0005978
17	C11	0.615	0.614	0.257	0.248	0.603941	0.237694	Maybridge	BTB 08269	MAC-0006010
17	D2	0.635	0.639	0.275	0.264	0.626441	0.254694	Maybridge	BTB 07737	MAC-0005753
17	D3	0.632	0.622	0.275	0.256	0.616441	0.250694	Maybridge	BTB 07795	MAC-0005789
17	D4	0.632	0.62	0.278	0.258	0.615441	0.253194	Maybridge	BTB 07844	MAC-0005808
17	D5	0.629	0.633	0.278	0.269	0.620441	0.258694	Maybridge	BTB 07905	MAC-0005839
17	D6	0.626	0.629	0.272	0.27	0.616941	0.256194	Maybridge	BTB 07951	MAC-0005864
17	D7	0.623	0.621	0.273	0.268	0.611441	0.255694	Maybridge	BTB 07985	MAC-0005875
17	D8	0.62	0.62	0.266	0.254	0.609441	0.245194	Maybridge	BTB 08108	MAC-0005906
17	D9	0.626	0.632	0.259	0.252	0.618441	0.240694	Maybridge	BTB 08163	MAC-0005950
17	D10	0.633	0.627	0.27	0.262	0.619441	0.251194	Maybridge	BTB 08205	MAC-0005982
17	D11	0.644	0.649	0.266	0.269	0.635941	0.252694	Maybridge	BTB 08277	MAC-0153461
17	E2	0.633	0.646	0.274	0.248	0.628941	0.246194	Maybridge	BTB 07739	MAC-0005754
17	E3	0.622	0.627	0.272	0.256	0.613941	0.249194	Maybridge	BTB 07807	MAC-0005792
17	E4	0.61	0.606	0.262	0.249	0.597441	0.240694	Maybridge	BTB 07859	MAC-0005814
17	E5	0.618	0.622	0.257	0.26	0.609441	0.243694	Maybridge	BTB 07908	MAC-0005841
17	E6	0.618	0.609	0.271	0.26	0.602941	0.250694	Maybridge	BTB 07952	MAC-0000154
17	E7	0.631	0.622	0.245	0.25	0.615941	0.232694	Maybridge	BTB 07995	MAC-0005878
17	E8	0.614	0.625	0.261	0.269	0.608941	0.250194	Maybridge	BTB 08116	MAC-0153438
17	E9	0.618	0.628	0.227	0.248	0.612441	0.222694	Maybridge	BTB 08166	MAC-0005953
17	E10	0.631	0.633	0.247	0.261	0.621441	0.239194	Maybridge	BTB 08209	MAC-0005985
17	E11	0.629	0.637	0.244	0.267	0.622441	0.240694	Maybridge	BTB 08278	MAC-0006013
17	F2	0.627	0.637	0.239	0.231	0.621441	0.220194	Maybridge	BTB 07764	MAC-0005775
17	F3	0.625	0.629	0.272	0.252	0.616441	0.247194	Maybridge	BTB 07814	MAC-0153399
17	F4	0.623	0.624	0.263	0.243	0.612941	0.238194	Maybridge	BTB 07870	MAC-0005815
17	F5	0.622	0.631	0.267	0.256	0.615941	0.246694	Maybridge	BTB 07909	MAC-0005842
17	F6	0.634	0.631	0.255	0.259	0.621941	0.242194	Maybridge	BTB 07953	MAC-0005866
17	F7	0.608	0.632	0.246	0.255	0.609441	0.235694	Maybridge	BTB 07998	MAC-0005879
17	F8	0.63	0.638	0.253	0.255	0.623441	0.239194	Maybridge	BTB 08129	MAC-0005925
17	F9	0.624	0.626	0.249	0.262	0.614441	0.240694	Maybridge	BTB 08168	MAC-0005955
17	F10	0.632	0.628	0.235	0.252	0.619441	0.228694	Maybridge	BTB 08217	MAC-0005989
17	F11	0.637	0.641	0.26	0.303	0.628441	0.266694	Maybridge	BTB 08289	MAC-0153463
17	G2	0.628	0.645	0.237	0.238	0.625941	0.222694	Maybridge	BTB 07769	MAC-0005777
17	G3	0.61	0.634	0.233	0.246	0.611441	0.224694	Maybridge	BTB 07816	MAC-0005797
17	G4	0.622	0.621	0.242	0.238	0.610941	0.225194	Maybridge	BTB 07873	MAC-0005817
17	G5	0.624	0.622	0.248	0.252	0.612441	0.235194	Maybridge	BTB 07914	MAC-0005846
17	G6	0.625	0.628	0.244	0.252	0.615941	0.233194	Maybridge	BTB 07961	MAC-0005867
17	G7	0.627	0.638	0.259	0.258	0.621941	0.243694	Maybridge	BTB 08014	MAC-0153432
17	G8	0.623	0.627	0.244	0.26	0.614441	0.237194	Maybridge	BTB 08131	MAC-0005927
17	G9	0.625	0.633	0.254	0.271	0.618441	0.247694	Maybridge	BTB 08181	MAC-0000157
17	G10	0.634	0.641	0.252	0.275	0.626941	0.248694	Maybridge	BTB 08225	MAC-0005992
17	G11	0.634	0.645	0.255	0.281	0.628941	0.253194	Maybridge	BTB 08297	MAC-0006030
17	H2	0.661	0.67	0.251	0.25	0.654941	0.235694	Maybridge	BTB 07773	MAC-0005780
17	H3	0.657	0.663	0.226	0.228	0.649441	0.212194	Maybridge	BTB 07817	MAC-0153401
17	H4	0.653	0.653	0.271	0.265	0.642441	0.253194	Maybridge	BTB 07880	MAC-0005822
17	H5	0.642	0.642	0.253	0.275	0.631441	0.249194	Maybridge	BTB 07915	MAC-0005847
17	H6	0.662	0.654	0.254	0.27	0.647441	0.247194	Maybridge	BTB 07963	MAC-0005869
17	H7	0.659	0.666	0.267	0.287	0.651941	0.262194	Maybridge	BTB 08025	MAC-0005886
17	H8	0.658	0.661	0.262	0.291	0.648941	0.261694	Maybridge	BTB 08139	MAC-0005933
17	H9	0.651	0.645	0.261	0.302	0.637441	0.266694	Maybridge	BTB 08185	MAC-0153449
17	H10	0.665	0.662	0.265	0.285	0.652941	0.260194	Maybridge	BTB 08242	MAC-0005998
17	H11	0.673	0.671	0.272	0.289	0.661441	0.265694	Maybridge	BTB 08301	MAC-0006032
18	A2	0.639	0.641	0.237	0.248	0.639216	0.226794	Maybridge	BTB 08316	MAC-0153466
18	A3	0.638	0.623	0.246	0.255	0.629716	0.234794	Maybridge	BTB 08357	MAC-0006060
18	A4	0.626	0.634	0.233	0.246	0.629216	0.223794	Maybridge	BTB 08406	MAC-0153482
18	A5	0.625	0.623	0.244	0.251	0.623216	0.231794	Maybridge	BTB 08461	MAC-0006102
18	A6	0.64	0.639	0.232	0.254	0.638716	0.227294	Maybridge	BTB 08524	MAC-0006133
18	A7	0.622	0.619	0.217	0.242	0.619716	0.213794	Maybridge	BTB 08561	MAC-0006161
18	A8	0.628	0.632	0.226	0.251	0.629216	0.222794	Maybridge	BTB 08602	MAC-0006180
18	A9	0.627	0.617	0.25	0.275	0.621216	0.246794	Maybridge	BTB 08695	MAC-0006227
18	A10	0.644	0.629	0.265	0.283	0.635716	0.258294	Maybridge	BTB 08741	MAC-0006247
18	A11	0.646	0.64	0.253	0.282	0.642216	0.251794	Maybridge	BTB 08806	MAC-0153538
18	B2	0.635	0.623	0.264	0.272	0.628216	0.252294	Maybridge	BTB 08329	MAC-0153467
18	B3	0.635	0.61	0.263	0.266	0.621716	0.248794	Maybridge	BTB 08359	MAC-0006062
18	B4	0.627	0.616	0.268	0.279	0.620716	0.257794	Maybridge	BTB 08407	MAC-0006083
18	B5	0.628	0.609	0.274	0.282	0.617716	0.262294	Maybridge	BTB 08467	MAC-0006106
18	B6	0.631	0.607	0.262	0.273	0.618216	0.251794	Maybridge	BTB 08526	MAC-0006135
18	B7	0.628	0.595	0.268	0.279	0.610716	0.257794	Maybridge	BTB 08565	MAC-0006164
18	B8	0.636	0.609	0.267	0.276	0.621716	0.255794	Maybridge	BTB 08617	MAC-0006191
18	B9	0.632	0.62	0.261	0.28	0.625216	0.254794	Maybridge	BTB 08698	MAC-0153523
18	B10	0.638	0.614	0.258	0.284	0.625216	0.255294	Maybridge	BTB 08746	MAC-0006252
18	B11	0.633	0.606	0.265	0.282	0.618716	0.257794	Maybridge	BTB 08809	MAC-0153539
18	C2	0.624	0.611	0.259	0.269	0.616716	0.248294	Maybridge	BTB 08332	MAC-0153468
18	C3	0.622	0.61	0.259	0.268	0.615216	0.247794	Maybridge	BTB 08372	MAC-0006073
18	C4	0.613	0.608	0.257	0.268	0.609716	0.246794	Maybridge	BTB 08414	MAC-0006086
18	C5	0.528	0.525	0.182	0.19	0.525716	0.170294	Maybridge	BTB 08470	MAC-0006109
18	C6	0.618	0.601	0.256	0.267	0.608716	0.245794	Maybridge	BTB 08529	MAC-0006138
18	C7	0.628	0.603	0.273	0.273	0.614716	0.257294	Maybridge	BTB 08570	MAC-0006168
18	C8	0.593	0.597	0.257	0.269	0.594216	0.247294	Maybridge	BTB 08628	MAC-0006197
18	C9	0.607	0.589	0.259	0.279	0.597216	0.253294	Maybridge	BTB 08703	MAC-0006229
18	C10	0.633	0.608	0.264	0.28	0.619716	0.256294	Maybridge	BTB 08753	MAC-0006256
18	C11	0.619	0.603	0.268	0.28	0.610216	0.258294	Maybridge	BTB 08810	MAC-0006298
18	D2	0.627	0.614	0.26	0.261	0.619716	0.244794	Maybridge	BTB 08337	MAC-0006047
18	D3	0.627	0.595	0.264	0.264	0.610216	0.248294	Maybridge	BTB 08373	MAC-0153477
18	D4	0.63	0.597	0.266	0.274	0.612716	0.254294	Maybridge	BTB 08417	MAC-0006087
18	D5	0.617	0.611	0.263	0.276	0.613216	0.253794	Maybridge	BTB 08475	MAC-0006112
18	D6	0.613	0.613	0.265	0.273	0.612216	0.253294	Maybridge	BTB 08530	MAC-0006139
18	D7	0.616	0.606	0.266	0.272	0.610216	0.253294	Maybridge	BTB 08571	MAC-0153509
18	D8	0.618	0.603	0.261	0.265	0.609716	0.247294	Maybridge	BTB 08637	MAC-0006202
18	D9	0.618	0.605	0.263	0.279	0.610716	0.255294	Maybridge	BTB 08704	MAC-0006230
18	D10	0.632	0.615	0.266	0.279	0.622716	0.256794	Maybridge	BTB 08755	MAC-0006257
18	D11	0.635	0.631	0.268	0.277	0.632216	0.256794	Maybridge	BTB 08820	MAC-0006305
18	E2	0.628	0.62	0.251	0.251	0.623216	0.235294	Maybridge	BTB 08343	MAC-0006050
18	E3	0.62	0.615	0.255	0.264	0.616716	0.243794	Maybridge	BTB 08384	MAC-0006075
18	E4	0.619	0.596	0.258	0.264	0.606716	0.245294	Maybridge	BTB 08419	MAC-0006089
18	E5	0.61	0.609	0.26	0.264	0.608716	0.246294	Maybridge	BTB 08481	MAC-0006113
18	E6	0.612	0.597	0.269	0.264	0.603716	0.250794	Maybridge	BTB 08538	MAC-0153502
18	E7	0.628	0.61	0.258	0.263	0.618216	0.244794	Maybridge	BTB 08585	MAC-0006174
18	E8	0.612	0.605	0.25	0.266	0.607716	0.242294	Maybridge	BTB 08681	MAC-0006218
18	E9	0.617	0.606	0.237	0.269	0.610716	0.237294	Maybridge	BTB 08705	MAC-0006231
18	E10	0.617	0.613	0.261	0.271	0.614216	0.250294	Maybridge	BTB 08756	MAC-0000165
18	E11	0.627	0.62	0.259	0.273	0.622716	0.250294	Maybridge	BTB 08825	MAC-0006309
18	F2	0.636	0.624	0.252	0.271	0.629216	0.245794	Maybridge	BTB 08346	MAC-0006051
18	F3	0.626	0.624	0.249	0.258	0.624216	0.237794	Maybridge	BTB 08387	MAC-0006077
18	F4	0.62	0.605	0.261	0.264	0.611716	0.246794	Maybridge	BTB 08441	MAC-0006095
18	F5	0.626	0.622	0.264	0.262	0.623216	0.247294	Maybridge	BTB 08489	MAC-0006118
18	F6	0.631	0.622	0.267	0.265	0.625716	0.250294	Maybridge	BTB 08544	MAC-0006149
18	F7	0.608	0.617	0.262	0.267	0.611716	0.248794	Maybridge	BTB 08593	MAC-0153511
18	F8	0.617	0.617	0.264	0.28	0.616216	0.256294	Maybridge	BTB 08686	MAC-0006220
18	F9	0.615	0.612	0.254	0.271	0.612716	0.246794	Maybridge	BTB 08730	MAC-0006244
18	F10	0.626	0.612	0.262	0.269	0.618216	0.249794	Maybridge	BTB 08759	MAC-0000166
18	F11	0.633	0.613	0.252	0.26	0.622216	0.240294	Maybridge	BTB 08826	MAC-0006310
18	G2	0.616	0.616	0.249	0.259	0.615216	0.238294	Maybridge	BTB 08348	MAC-0006053
18	G3	0.605	0.623	0.236	0.249	0.613216	0.226794	Maybridge	BTB 08389	MAC-0006078
18	G4	0.613	0.608	0.255	0.251	0.609716	0.237294	Maybridge	BTB 08458	MAC-0006099
18	G5	0.621	0.617	0.256	0.248	0.618216	0.236294	Maybridge	BTB 08518	MAC-0006128
18	G6	0.623	0.615	0.251	0.25	0.618216	0.234794	Maybridge	BTB 08554	MAC-0006155
18	G7	0.624	0.629	0.261	0.269	0.625716	0.249294	Maybridge	BTB 08600	MAC-0006178
18	G8	0.621	0.613	0.261	0.265	0.616216	0.247294	Maybridge	BTB 08690	MAC-0006224
18	G9	0.628	0.625	0.26	0.265	0.625716	0.246794	Maybridge	BTB 08731	MAC-0153528
18	G10	0.632	0.635	0.255	0.262	0.632716	0.242794	Maybridge	BTB 08766	MAC-0006265
18	G11	0.636	0.629	0.258	0.243	0.631716	0.234794	Maybridge	BTB 08830	MAC-0153544
18	H2	0.646	0.628	0.228	0.266	0.636216	0.231294	Maybridge	BTB 08352	MAC-0006055
18	H3	0.658	0.617	0.257	0.25	0.636716	0.237794	Maybridge	BTB 08404	MAC-0006081
18	H4	0.629	0.611	0.28	0.266	0.619216	0.257294	Maybridge	BTB 08460	MAC-0006101
18	H5	0.644	0.629	0.269	0.26	0.635716	0.248794	Maybridge	BTB 08522	MAC-0006131
18	H6	0.654	0.615	0.271	0.271	0.633716	0.255294	Maybridge	BTB 08556	MAC-0006157
18	H7	0.613	0.586	0.274	0.286	0.598716	0.264294	Maybridge	BTB 08601	MAC-0006179
18	H8	0.644	0.613	0.267	0.267	0.627716	0.251294	Maybridge	BTB 08691	MAC-0006225
18	H9	0.661	0.646	0.266	0.261	0.652716	0.247794	Maybridge	BTB 08732	MAC-0006245
18	H10	0.654	0.643	0.267	0.261	0.647716	0.248294	Maybridge	BTB 08778	MAC-0006273
18	H11	0.666	0.623	0.271	0.241	0.643716	0.240294	Maybridge	BTB 08836	MAC-0153545
19	A2	0.647	0.643	0.251	0.248	0.671478	0.267469	Maybridge	BTB 08840	MAC-0153546
19	A3	0.632	0.619	0.252	0.249	0.651978	0.268469	Maybridge	BTB 08887	MAC-0006333
19	A4	0.631	0.612	0.247	0.245	0.647978	0.263969	Maybridge	BTB 08939	MAC-0006352
19	A5	0.632	0.614	0.246	0.251	0.649478	0.266469	Maybridge	BTB 08975	MAC-0006373
19	A6	0.637	0.62	0.252	0.265	0.654978	0.276469	Maybridge	BTB 09051	MAC-0006406
19	A7	0.643	0.631	0.251	0.259	0.663478	0.272969	Maybridge	BTB 09101	MAC-0006427
19	A8	0.625	0.608	0.24	0.253	0.642978	0.264469	Maybridge	BTB 09154	MAC-0153594
19	A9	0.627	0.627	0.25	0.255	0.653478	0.270469	Maybridge	BTB 09217	MAC-0006465
19	A10	0.626	0.631	0.255	0.26	0.654978	0.275469	Maybridge	BTB 09297	MAC-0006488
19	A11	0.632	0.629	0.247	0.239	0.656978	0.260969	Maybridge	BTB 09316	MAC-0153618
19	B2	0.606	0.621	0.257	0.26	0.639978	0.276469	Maybridge	BTB 08843	MAC-0006315
19	B3	0.606	0.625	0.266	0.271	0.641978	0.286469	Maybridge	BTB 08898	MAC-0006334
19	B4	0.588	0.612	0.264	0.268	0.626478	0.283969	Maybridge	BTB 08942	MAC-0006355
19	B5	0.584	0.613	0.252	0.268	0.624978	0.277969	Maybridge	BTB 08976	MAC-0153571
19	B6	0.578	0.604	0.239	0.266	0.617478	0.270469	Maybridge	BTB 09064	MAC-0006412
19	B7	0.597	0.61	0.226	0.265	0.629978	0.263469	Maybridge	BTB 09106	MAC-0006430
19	B8	0.608	0.592	0.225	0.259	0.626478	0.259969	Maybridge	BTB 09157	MAC-0006445
19	B9	0.596	0.605	0.221	0.256	0.626978	0.256469	Maybridge	BTB 09218	MAC-0006466
19	B10	0.597	0.619	0.225	0.247	0.634478	0.253969	Maybridge	BTB 09300	MAC-0006489
19	B11	0.608	0.611	0.237	0.244	0.635978	0.258469	Maybridge	BTB 09317	MAC-0006494
19	C2	0.598	0.613	0.258	0.256	0.631978	0.274969	Maybridge	BTB 08844	MAC-0153548
19	C3	0.572	0.612	0.259	0.263	0.618478	0.278969	Maybridge	BTB 08903	MAC-0153556
19	C4	0.555	0.606	0.259	0.263	0.606978	0.278969	Maybridge	BTB 08946	MAC-0006359
19	C5	0.556	0.602	0.226	0.251	0.605478	0.256469	Maybridge	BTB 08980	MAC-0006374
19	C6	0.549	0.59	0.216	0.253	0.595978	0.252469	Maybridge	BTB 09066	MAC-0006413
19	C7	0.564	0.584	0.237	0.262	0.600478	0.267469	Maybridge	BTB 09114	MAC-0153588
19	C8	0.562	0.576	0.196	0.242	0.595478	0.236969	Maybridge	BTB 09160	MAC-0006446
19	C9	0.571	0.562	0.193	0.236	0.592978	0.232469	Maybridge	BTB 09243	MAC-0006475
19	C10	0.577	0.578	0.18	0.217	0.603978	0.216469	Maybridge	BTB 09301	MAC-0153612
19	C11	0.589	0.601	0.2	0.22	0.621478	0.227969	Maybridge	BTB 09325	MAC-0006498
19	D2	0.599	0.611	0.251	0.251	0.631478	0.268969	Maybridge	BTB 08846	MAC-0153549
19	D3	0.578	0.597	0.25	0.247	0.613978	0.266469	Maybridge	BTB 08906	MAC-0006337
19	D4	0.582	0.605	0.264	0.257	0.619978	0.278469	Maybridge	BTB 08948	MAC-0006361
19	D5	0.553	0.613	0.24	0.25	0.609478	0.262969	Maybridge	BTB 08982	MAC-0006375
19	D6	0.546	0.616	0.236	0.264	0.607478	0.267969	Maybridge	BTB 09071	MAC-0153581
19	D7	0.551	0.599	0.213	0.254	0.601478	0.251469	Maybridge	BTB 09118	MAC-0153589
19	D8	0.543	0.577	0.195	0.233	0.586478	0.231969	Maybridge	BTB 09179	MAC-0006455
19	D9	0.569	0.579	0.184	0.232	0.600478	0.225969	Maybridge	BTB 09245	MAC-0006477
19	D10	0.588	0.581	0.192	0.221	0.610978	0.224469	Maybridge	BTB 09305	MAC-0153613
19	D11	0.599	0.595	0.202	0.194	0.623478	0.215969	Maybridge	BTB 09327	MAC-0006499
19	E2	0.6	0.626	0.245	0.249	0.639478	0.264969	Maybridge	BTB 08855	MAC-0006319
19	E3	0.573	0.606	0.247	0.249	0.615978	0.265969	Maybridge	BTB 08913	MAC-0006340
19	E4	0.547	0.595	0.236	0.244	0.597478	0.257969	Maybridge	BTB 08965	MAC-0006367
19	E5	0.542	0.609	0.241	0.248	0.601978	0.262469	Maybridge	BTB 08991	MAC-0006378
19	E6	0.532	0.595	0.235	0.251	0.589978	0.260969	Maybridge	BTB 09074	MAC-0006416
19	E7	0.538	0.603	0.222	0.255	0.596978	0.256469	Maybridge	BTB 09124	MAC-0006436
19	E8	0.52	0.585	0.198	0.247	0.578978	0.240469	Maybridge	BTB 09185	MAC-0153598
19	E9	0.541	0.569	0.166	0.219	0.581478	0.210469	Maybridge	BTB 09259	MAC-0153606
19	E10	0.571	0.551	0.168	0.202	0.587478	0.202969	Maybridge	BTB 09309	MAC-0153614
19	E11	0.597	0.594	0.183	0.193	0.621978	0.205969	Maybridge	BTB 09333	MAC-0006501
19	F2	0.603	0.625	0.245	0.24	0.640478	0.260469	Maybridge	BTB 08860	MAC-0006324
19	F3	0.587	0.614	0.243	0.247	0.626978	0.262969	Maybridge	BTB 08921	MAC-0006343
19	F4	0.577	0.604	0.251	0.25	0.616978	0.268469	Maybridge	BTB 08967	MAC-0006368
19	F5	0.547	0.612	0.23	0.257	0.605978	0.261469	Maybridge	BTB 09018	MAC-0006392
19	F6	0.523	0.606	0.212	0.252	0.590978	0.249969	Maybridge	BTB 09089	MAC-0006423
19	F7	0.512	0.606	0.198	0.247	0.585478	0.240469	Maybridge	BTB 09128	MAC-0153591
19	F8	0.531	0.596	0.182	0.246	0.589978	0.231969	Maybridge	BTB 09198	MAC-0006457
19	F9	0.54	0.578	0.164	0.224	0.585478	0.211969	Maybridge	BTB 09261	MAC-0006480
19	F10	0.558	0.579	0.175	0.225	0.594978	0.217969	Maybridge	BTB 09311	MAC-0006491
19	F11	0.593	0.576	0.21	0.193	0.610978	0.219469	Maybridge	BTB 09341	MAC-0153623
19	G2	0.587	0.626	0.222	0.245	0.632978	0.251469	Maybridge	BTB 08861	MAC-0006325
19	G3	0.57	0.608	0.213	0.254	0.615478	0.251469	Maybridge	BTB 08925	MAC-0006345
19	G4	0.575	0.602	0.217	0.25	0.614978	0.251469	Maybridge	BTB 08970	MAC-0006371
19	G5	0.552	0.606	0.209	0.252	0.605478	0.248469	Maybridge	BTB 09043	MAC-0006402
19	G6	0.553	0.603	0.207	0.251	0.604478	0.246969	Maybridge	BTB 09090	MAC-0006424
19	G7	0.532	0.615	0.19	0.248	0.599978	0.236969	Maybridge	BTB 09129	MAC-0006438
19	G8	0.534	0.592	0.17	0.225	0.589478	0.215469	Maybridge	BTB 09200	MAC-0006459
19	G9	0.549	0.592	0.165	0.223	0.596978	0.211969	Maybridge	BTB 09273	MAC-0006482
19	G10	0.556	0.588	0.177	0.19	0.598478	0.201469	Maybridge	BTB 09312	MAC-0006492
19	G11	0.584	0.596	0.172	0.196	0.616478	0.201969	Maybridge	BTB 09343	MAC-0006503
19	H2	0.616	0.656	0.222	0.25	0.662478	0.253969	Maybridge	BTB 08877	MAC-0153553
19	H3	0.627	0.641	0.213	0.256	0.660478	0.252469	Maybridge	BTB 08928	MAC-0006348
19	H4	0.624	0.653	0.194	0.27	0.664978	0.249969	Maybridge	BTB 08972	MAC-0006372
19	H5	0.601	0.633	0.182	0.253	0.643478	0.235469	Maybridge	BTB 09048	MAC-0006404
19	H6	0.6	0.65	0.179	0.243	0.651478	0.228969	Maybridge	BTB 09095	MAC-0006425
19	H7	0.584	0.644	0.185	0.245	0.640478	0.232969	Maybridge	BTB 09138	MAC-0153593
19	H8	0.578	0.642	0.172	0.222	0.636478	0.214969	Maybridge	BTB 09208	MAC-0006462
19	H9	0.582	0.631	0.174	0.205	0.632978	0.207469	Maybridge	BTB 09284	MAC-0153609
19	H10	0.603	0.647	0.196	0.224	0.651478	0.227969	Maybridge	BTB 09315	MAC-0006493
19	H11	0.621	0.626	0.2	0.198	0.649978	0.216969	Maybridge	BTB 09345	MAC-0006504
20	A2	0.634	0.634	0.244	0.248	0.633853	0.243532	Maybridge	BTB 09357	MAC-0006511
20	A3	0.612	0.628	0.239	0.25	0.619853	0.242032	Maybridge	BTB 09427	MAC-0006537
20	A4	0.598	0.616	0.234	0.251	0.606853	0.240032	Maybridge	BTB 09525	MAC-0006573
20	A5	0.609	0.625	0.242	0.242	0.616853	0.239532	Maybridge	BTB 09584	MAC-0006606
20	A6	0.612	0.635	0.238	0.251	0.623353	0.242032	Maybridge	BTB 09643	MAC-0153658
20	A7	0.609	0.623	0.232	0.249	0.615853	0.238032	Maybridge	BTB 09699	MAC-0006658
20	A8	0.617	0.623	0.226	0.237	0.619853	0.229032	Maybridge	BTB 09739	MAC-0006672
20	A9	0.618	0.617	0.249	0.244	0.617353	0.244032	Maybridge	BTB 09804	MAC-0006687
20	A10	0.624	0.623	0.258	0.258	0.623353	0.255532	Maybridge	BTB 09848	MAC-0006710
20	A11	0.638	0.633	0.253	0.251	0.635353	0.249532	Maybridge	BTB 09933	MAC-0153698
20	B2	0.612	0.625	0.255	0.223	0.618353	0.236532	Maybridge	BTB 09358	MAC-0006512
20	B3	0.619	0.634	0.26	0.242	0.626353	0.248532	Maybridge	BTB 09432	MAC-0006541
20	B4	0.617	0.63	0.267	0.252	0.623353	0.257032	Maybridge	BTB 09546	MAC-0006582
20	B5	0.612	0.623	0.264	0.244	0.617353	0.251532	Maybridge	BTB 09587	MAC-0006607
20	B6	0.608	0.62	0.263	0.245	0.613853	0.251532	Maybridge	BTB 09651	MAC-0006638
20	B7	0.611	0.633	0.26	0.244	0.621853	0.249532	Maybridge	BTB 09703	MAC-0006661
20	B8	0.609	0.606	0.259	0.254	0.607353	0.254032	Maybridge	BTB 09742	MAC-0006675
20	B9	0.614	0.623	0.259	0.246	0.618353	0.250032	Maybridge	BTB 09813	MAC-0006690
20	B10	0.614	0.628	0.252	0.221	0.620853	0.234032	Maybridge	BTB 09861	MAC-0153691
20	B11	0.591	0.592	0.231	0.231	0.591353	0.228532	Maybridge	BTB 09936	MAC-0153699
20	C2	0.608	0.622	0.251	0.249	0.614853	0.247532	Maybridge	BTB 09364	MAC-0006515
20	C3	0.608	0.624	0.259	0.248	0.615853	0.251032	Maybridge	BTB 09434	MAC-0006542
20	C4	0.6	0.614	0.258	0.253	0.606853	0.253032	Maybridge	BTB 09555	MAC-0006587
20	C5	0.607	0.62	0.26	0.258	0.613353	0.256532	Maybridge	BTB 09588	MAC-0006608
20	C6	0.612	0.619	0.254	0.256	0.615353	0.252532	Maybridge	BTB 09654	MAC-0006640
20	C7	0.625	0.623	0.252	0.267	0.623853	0.257032	Maybridge	BTB 09705	MAC-0006662
20	C8	0.608	0.62	0.242	0.258	0.613853	0.247532	Maybridge	BTB 09743	MAC-0006676
20	C9	0.604	0.611	0.24	0.256	0.607353	0.245532	Maybridge	BTB 09817	MAC-0006691
20	C10	0.621	0.618	0.254	0.257	0.619353	0.253032	Maybridge	BTB 09868	MAC-0153692
20	C11	0.614	0.619	0.249	0.247	0.616353	0.245532	Maybridge	BTB 09937	MAC-0153700
20	D2	0.616	0.629	0.246	0.259	0.622353	0.250032	Maybridge	BTB 09379	MAC-0153629
20	D3	0.608	0.606	0.241	0.235	0.606853	0.235532	Maybridge	BTB 09463	MAC-0153637
20	D4	0.622	0.62	0.257	0.264	0.620853	0.258032	Maybridge	BTB 09558	MAC-0006589
20	D5	0.622	0.634	0.257	0.264	0.627853	0.258032	Maybridge	BTB 09595	MAC-0006611
20	D6	0.613	0.626	0.261	0.267	0.619353	0.261532	Maybridge	BTB 09676	MAC-0006648
20	D7	0.617	0.623	0.249	0.272	0.619853	0.258032	Maybridge	BTB 09721	MAC-0153669
20	D8	0.609	0.615	0.242	0.263	0.611853	0.250032	Maybridge	BTB 09747	MAC-0006677
20	D9	0.608	0.624	0.245	0.258	0.615853	0.249032	Maybridge	BTB 09823	MAC-0006696
20	D10	0.617	0.623	0.241	0.26	0.619853	0.248032	Maybridge	BTB 09871	MAC-0006714
20	D11	0.63	0.633	0.243	0.246	0.631353	0.242032	Maybridge	BTB 09973	MAC-0006732
20	E2	0.615	0.632	0.255	0.265	0.623353	0.257532	Maybridge	BTB 09381	MAC-0006518
20	E3	0.607	0.617	0.225	0.219	0.611853	0.219532	Maybridge	BTB 09501	MAC-0006558
20	E4	0.598	0.595	0.251	0.265	0.596353	0.255532	Maybridge	BTB 09565	MAC-0006596
20	E5	0.605	0.618	0.247	0.258	0.611353	0.250032	Maybridge	BTB 09597	MAC-0006612
20	E6	0.61	0.606	0.236	0.251	0.607853	0.241032	Maybridge	BTB 09682	MAC-0153662
20	E7	0.615	0.62	0.241	0.247	0.617353	0.241532	Maybridge	BTB 09726	MAC-0006665
20	E8	0.593	0.597	0.229	0.249	0.594853	0.236532	Maybridge	BTB 09757	MAC-0006680
20	E9	0.612	0.623	0.231	0.24	0.617353	0.233032	Maybridge	BTB 09826	MAC-0006698
20	E10	0.615	0.619	0.24	0.254	0.616853	0.244532	Maybridge	BTB 09880	MAC-0006716
20	E11	0.624	0.622	0.24	0.255	0.622853	0.245032	Maybridge	BTB 09981	MAC-0006734
20	F2	0.617	0.64	0.245	0.243	0.628353	0.241532	Maybridge	BTB 09390	MAC-0006522
20	F3	0.615	0.627	0.244	0.253	0.620853	0.246032	Maybridge	BTB 09503	MAC-0006560
20	F4	0.604	0.608	0.247	0.262	0.605853	0.252032	Maybridge	BTB 09569	MAC-0006600
20	F5	0.611	0.615	0.245	0.254	0.612853	0.247032	Maybridge	BTB 09602	MAC-0000174
20	F6	0.615	0.626	0.238	0.256	0.620353	0.244532	Maybridge	BTB 09692	MAC-0006654
20	F7	0.6	0.626	0.224	0.245	0.612853	0.232032	Maybridge	BTB 09731	MAC-0006666
20	F8	0.619	0.631	0.243	0.259	0.624853	0.248532	Maybridge	BTB 09763	MAC-0006681
20	F9	0.604	0.618	0.234	0.24	0.610853	0.234532	Maybridge	BTB 09833	MAC-0006702
20	F10	0.617	0.625	0.236	0.254	0.620853	0.242532	Maybridge	BTB 09891	MAC-0081071
20	F11	0.625	0.627	0.232	0.251	0.625853	0.239032	Maybridge	BTB 09985	MAC-0006735
20	G2	0.614	0.639	0.237	0.255	0.626353	0.243532	Maybridge	BTB 09392	MAC-0153632
20	G3	0.598	0.631	0.233	0.256	0.614353	0.242032	Maybridge	BTB 09515	MAC-0006566
20	G4	0.61	0.622	0.231	0.248	0.615853	0.237032	Maybridge	BTB 09571	MAC-0006601
20	G5	0.611	0.616	0.24	0.248	0.613353	0.241532	Maybridge	BTB 09629	MAC-0006628
20	G6	0.612	0.615	0.235	0.254	0.613353	0.242032	Maybridge	BTB 09695	MAC-0006655
20	G7	0.619	0.629	0.244	0.249	0.623853	0.244032	Maybridge	BTB 09732	MAC-0006667
20	G8	0.62	0.616	0.23	0.256	0.617853	0.240532	Maybridge	BTB 09775	MAC-0153680
20	G9	0.618	0.62	0.231	0.248	0.618853	0.237032	Maybridge	BTB 09845	MAC-0006708
20	G10	0.626	0.635	0.21	0.242	0.630353	0.223532	Maybridge	BTB 09918	MAC-0000176
20	G11	0.625	0.639	0.236	0.252	0.631853	0.241532	Maybridge	BTB 09989	MAC-0006736
20	H2	0.65	0.664	0.245	0.263	0.656853	0.251532	Maybridge	BTB 09424	MAC-0006536
20	H3	0.649	0.657	0.27	0.266	0.652853	0.265532	Maybridge	BTB 09516	MAC-0006567
20	H4	0.642	0.646	0.255	0.241	0.643853	0.245532	Maybridge	BTB 09572	MAC-0153649
20	H5	0.637	0.655	0.244	0.249	0.645853	0.244032	Maybridge	BTB 09630	MAC-0006629
20	H6	0.655	0.64	0.248	0.25	0.647353	0.246532	Maybridge	BTB 09697	MAC-0006657
20	H7	0.64	0.653	0.253	0.266	0.646353	0.257032	Maybridge	BTB 09737	MAC-0006670
20	H8	0.636	0.649	0.244	0.255	0.642353	0.247032	Maybridge	BTB 09803	MAC-0000175
20	H9	0.646	0.645	0.25	0.255	0.645353	0.250032	Maybridge	BTB 09847	MAC-0006709
20	H10	0.644	0.657	0.242	0.276	0.650353	0.256532	Maybridge	BTB 09928	MAC-0153697
20	H11	0.655	0.639	0.23	0.269	0.646853	0.247032	Maybridge	BTB 09994	MAC-0006738
21	A2	0.641	0.647	0.247	0.245	0.637766	0.241182	Maybridge	BTB 10000	MAC-0006739
21	A3	0.563	0.568	0.005	0.005	0.559266	0.000181738	Maybridge	BTB 10020	MAC-0006747
21	A4	0.619	0.627	0.248	0.247	0.616766	0.242682	Maybridge	BTB 10067	MAC-0006765
21	A5	0.632	0.638	0.237	0.238	0.628766	0.232682	Maybridge	BTB 10109	MAC-0153730
21	A6	0.633	0.629	0.242	0.242	0.624766	0.237182	Maybridge	BTB 10176	MAC-0006804
21	A7	0.627	0.637	0.239	0.239	0.625766	0.234182	Maybridge	BTB 10244	MAC-0153746
21	A8	0.577	0.579	0.211	0.211	0.571766	0.206182	Maybridge	BTB 10323	MAC-0006849
21	A9	0.624	0.627	0.24	0.24	0.619266	0.235182	Maybridge	BTB 10416	MAC-0006882
21	A10	0.638	0.628	0.245	0.244	0.626766	0.239682	Maybridge	BTB 10448	MAC-0153770
21	A11	0.636	0.638	0.25	0.246	0.630766	0.243182	Maybridge	BTB 10563	MAC-0153778
21	B2	0.639	0.648	0.27	0.265	0.637266	0.262682	Maybridge	BTB 10004	MAC-0153707
21	B3	0.646	0.646	0.267	0.268	0.639766	0.262682	Maybridge	BTB 10024	MAC-0153715
21	B4	0.636	0.646	0.27	0.268	0.634766	0.264182	Maybridge	BTB 10069	MAC-0006766
21	B5	0.633	0.632	0.269	0.268	0.626266	0.263682	Maybridge	BTB 10118	MAC-0006781
21	B6	0.627	0.632	0.264	0.264	0.623266	0.259182	Maybridge	BTB 10182	MAC-0006807
21	B7	0.626	0.63	0.268	0.261	0.621766	0.259682	Maybridge	BTB 10252	MAC-0153747
21	B8	0.631	0.613	0.27	0.261	0.615766	0.260682	Maybridge	BTB 10373	MAC-0153755
21	B9	0.632	0.633	0.261	0.261	0.626266	0.256182	Maybridge	BTB 10417	MAC-0006883
21	B10	0.624	0.626	0.253	0.261	0.618766	0.252182	Maybridge	BTB 10453	MAC-0006894
21	B11	0.621	0.611	0.26	0.235	0.609766	0.242682	Maybridge	BTB 10588	MAC-0006940
21	C2	0.626	0.626	0.264	0.263	0.619766	0.258682	Maybridge	BTB 10007	MAC-0153708
21	C3	0.635	0.635	0.267	0.269	0.628766	0.263182	Maybridge	BTB 10038	MAC-0006752
21	C4	0.615	0.622	0.262	0.265	0.612266	0.258682	Maybridge	BTB 10079	MAC-0006769
21	C5	0.619	0.626	0.263	0.262	0.616266	0.257682	Maybridge	BTB 10119	MAC-0006782
21	C6	0.614	0.618	0.256	0.27	0.609766	0.258182	Maybridge	BTB 10185	MAC-0006808
21	C7	0.627	0.625	0.264	0.267	0.619766	0.260682	Maybridge	BTB 10259	MAC-0006837
21	C8	0.618	0.625	0.243	0.238	0.615266	0.235682	Maybridge	BTB 10374	MAC-0153756
21	C9	0.618	0.613	0.257	0.239	0.609266	0.243182	Maybridge	BTB 10418	MAC-0006884
21	C10	0.624	0.619	0.26	0.236	0.615266	0.243182	Maybridge	BTB 10456	MAC-0006897
21	C11	0.624	0.627	0.246	0.235	0.619266	0.235682	Maybridge	BTB 10591	MAC-0006941
21	D2	0.638	0.636	0.241	0.247	0.630766	0.239182	Maybridge	BTB 10009	MAC-0006742
21	D3	0.62	0.614	0.265	0.263	0.610766	0.259182	Maybridge	BTB 10040	MAC-0006753
21	D4	0.633	0.624	0.268	0.272	0.622266	0.265182	Maybridge	BTB 10085	MAC-0006772
21	D5	0.625	0.632	0.262	0.271	0.622266	0.261682	Maybridge	BTB 10129	MAC-0006783
21	D6	0.617	0.625	0.268	0.264	0.614766	0.261182	Maybridge	BTB 10187	MAC-0006729
21	D7	0.627	0.619	0.26	0.251	0.616766	0.250682	Maybridge	BTB 10303	MAC-0153749
21	D8	0.623	0.619	0.245	0.26	0.614766	0.247682	Maybridge	BTB 10401	MAC-0006875
21	D9	0.614	0.615	0.261	0.248	0.608266	0.249682	Maybridge	BTB 10419	MAC-0006885
21	D10	0.623	0.615	0.256	0.249	0.612766	0.247682	Maybridge	BTB 10516	MAC-0006922
21	D11	0.634	0.635	0.255	0.243	0.628266	0.244182	Maybridge	BTB 10593	MAC-0006942
21	E2	0.632	0.639	0.23	0.222	0.629266	0.221182	Maybridge	BTB 10010	MAC-0006743
21	E3	0.623	0.624	0.256	0.259	0.617266	0.252682	Maybridge	BTB 10048	MAC-0006756
21	E4	0.611	0.602	0.254	0.259	0.600266	0.251682	Maybridge	BTB 10090	MAC-0006775
21	E5	0.608	0.615	0.259	0.264	0.605266	0.256682	Maybridge	BTB 10135	MAC-0006785
21	E6	0.612	0.607	0.261	0.25	0.603266	0.250682	Maybridge	BTB 10204	MAC-0006817
21	E7	0.622	0.619	0.233	0.25	0.614266	0.236682	Maybridge	BTB 10305	MAC-0006842
21	E8	0.61	0.62	0.252	0.23	0.608766	0.236182	Maybridge	BTB 10408	MAC-0006878
21	E9	0.622	0.624	0.243	0.251	0.616766	0.242182	Maybridge	BTB 10424	MAC-0006888
21	E10	0.618	0.619	0.238	0.254	0.612266	0.241182	Maybridge	BTB 10530	MAC-0006925
21	E11	0.62	0.631	0.241	0.229	0.619266	0.230182	Maybridge	BTB 10623	MAC-0006945
21	F2	0.633	0.633	0.245	0.251	0.626766	0.243182	Maybridge	BTB 10012	MAC-0006744
21	F3	0.625	0.624	0.245	0.253	0.618266	0.244182	Maybridge	BTB 10051	MAC-0006758
21	F4	0.626	0.619	0.253	0.253	0.616266	0.248182	Maybridge	BTB 10091	MAC-0006776
21	F5	0.623	0.624	0.244	0.268	0.617266	0.251182	Maybridge	BTB 10142	MAC-0006789
21	F6	0.617	0.62	0.252	0.261	0.612266	0.251682	Maybridge	BTB 10214	MAC-0153743
21	F7	0.607	0.62	0.235	0.261	0.607266	0.243182	Maybridge	BTB 10312	MAC-0006844
21	F8	0.625	0.627	0.246	0.238	0.619766	0.237182	Maybridge	BTB 10409	MAC-0006879
21	F9	0.612	0.617	0.238	0.235	0.608266	0.231682	Maybridge	BTB 10426	MAC-0006889
21	F10	0.625	0.623	0.251	0.223	0.617766	0.232182	Maybridge	BTB 10547	MAC-0006933
21	F11	0.623	0.624	0.233	0.234	0.617266	0.228682	Maybridge	BTB 10624	MAC-0006946
21	G2	0.611	0.641	0.232	0.247	0.619766	0.234682	Maybridge	BTB 10013	MAC-0006745
21	G3	0.594	0.63	0.24	0.249	0.605766	0.239682	Maybridge	BTB 10060	MAC-0006760
21	G4	0.611	0.614	0.243	0.258	0.606266	0.245682	Maybridge	BTB 10095	MAC-0153728
21	G5	0.625	0.619	0.24	0.258	0.615766	0.244182	Maybridge	BTB 10169	MAC-0006800
21	G6	0.62	0.617	0.248	0.253	0.612266	0.245682	Maybridge	BTB 10217	MAC-0006822
21	G7	0.63	0.637	0.226	0.257	0.627266	0.236682	Maybridge	BTB 10315	MAC-0153752
21	G8	0.627	0.623	0.249	0.245	0.618766	0.242182	Maybridge	BTB 10411	MAC-0006881
21	G9	0.627	0.625	0.235	0.256	0.619766	0.240682	Maybridge	BTB 10427	MAC-0006890
21	G10	0.628	0.639	0.241	0.214	0.627266	0.222682	Maybridge	BTB 10553	MAC-0006935
21	G11	0.629	0.609	0.25	0.229	0.612766	0.234682	Maybridge	BTB 10629	MAC-0006947
21	H2	0.664	0.676	0.256	0.259	0.663766	0.252682	Maybridge	BTB 10018	MAC-0006746
21	H3	0.652	0.663	0.254	0.249	0.651266	0.246682	Maybridge	BTB 10066	MAC-0006764
21	H4	0.664	0.67	0.26	0.26	0.660766	0.255182	Maybridge	BTB 10106	MAC-0006777
21	H5	0.642	0.653	0.257	0.263	0.641266	0.255182	Maybridge	BTB 10173	MAC-0006801
21	H6	0.654	0.662	0.263	0.271	0.651766	0.262182	Maybridge	BTB 10218	MAC-0006823
21	H7	0.461	0.466	0.219	0.214	0.457266	0.211682	Maybridge	BTB 10320	MAC-0006847
21	H8	0.652	0.667	0.252	0.26	0.653266	0.251182	Maybridge	BTB 10415	MAC-0153761
21	H9	0.662	0.677	0.243	0.251	0.663266	0.242182	Maybridge	BTB 10436	MAC-0006891
21	H10	0.654	0.672	0.247	0.24	0.656766	0.238682	Maybridge	BTB 10555	MAC-0006936
21	H11	0.662	0.651	0.246	0.211	0.650266	0.223682	Maybridge	BTB 10639	MAC-0153785
22	A2	0.641	0.626	0.243	0.246	0.644141	0.242244	Maybridge	BTB 10685	MAC-0006961
22	A3	0.635	0.657	0.236	0.243	0.656641	0.237244	Maybridge	BTB 10743	MAC-0006986
22	A4	0.629	0.635	0.234	0.238	0.642641	0.233744	Maybridge	BTB 10835	MAC-0153802
22	A5	0.64	0.647	0.235	0.238	0.654141	0.234244	Maybridge	BTB 10954	MAC-0007046
22	A6	0.622	0.63	0.239	0.241	0.636641	0.237744	Maybridge	BTB 11122	MAC-0007113
22	A7	0.626	0.622	0.241	0.246	0.634641	0.241244	Maybridge	BTB 11260	MAC-0153826
22	A8	0.627	0.628	0.24	0.238	0.638141	0.236744	Maybridge	RJC 01840	MAC-0036955
22	A9	0.619	0.619	0.249	0.253	0.629641	0.248744	Maybridge	BTB 11533	MAC-0007266
22	A10	0.618	0.619	0.249	0.251	0.629141	0.247744	Maybridge	BTB 11577	MAC-0007288
22	A11	0.642	0.605	0.249	0.25	0.634141	0.247244	Maybridge	BTB 11661	MAC-0007309
22	B2	0.636	0.619	0.264	0.263	0.638141	0.261244	Maybridge	BTB 10688	MAC-0006963
22	B3	0.639	0.631	0.264	0.264	0.645641	0.261744	Maybridge	BTB 10773	MAC-0006988
22	B4	0.627	0.625	0.264	0.265	0.636641	0.262244	Maybridge	BTB 10843	MAC-0007010
22	B5	0.62	0.622	0.268	0.269	0.631641	0.266244	Maybridge	BTB 10956	MAC-0007047
22	B6	0.621	0.629	0.267	0.268	0.635641	0.265244	Maybridge	BTB 11124	MAC-0007114
22	B7	0.623	0.613	0.271	0.265	0.628641	0.265744	Maybridge	BTB 11321	MAC-0007161
22	B8	0.626	0.613	0.267	0.268	0.630141	0.265244	Maybridge	BTB 11505	MAC-0007245
22	B9	0.607	0.593	0.262	0.265	0.610641	0.261244	Maybridge	BTB 11534	MAC-0153843
22	B10	0.627	0.592	0.245	0.261	0.620141	0.250744	Maybridge	BTB 11600	MAC-0007295
22	B11	0.59	0.568	0.242	0.256	0.589641	0.246744	Maybridge	BTB 11683	MAC-0007315
22	C2	0.62	0.612	0.256	0.261	0.626641	0.256244	Maybridge	BTB 10690	MAC-0006964
22	C3	0.622	0.607	0.252	0.26	0.625141	0.253744	Maybridge	BTB 10777	MAC-0006989
22	C4	0.521	0.519	0.217	0.211	0.530641	0.211744	Maybridge	BTB 10868	MAC-0007018
22	C5	0.617	0.611	0.265	0.261	0.624641	0.260744	Maybridge	BTB 11001	MAC-0007069
22	C6	0.612	0.616	0.263	0.264	0.624641	0.261244	Maybridge	BTB 11141	MAC-0007120
22	C7	0.611	0.595	0.269	0.265	0.613641	0.264744	Maybridge	BTB 11351	MAC-0007179
22	C8	0.596	0.593	0.245	0.251	0.605141	0.245744	Maybridge	BTB 11507	MAC-0007247
22	C9	0.607	0.581	0.229	0.245	0.604641	0.234744	Maybridge	BTB 11545	MAC-0007270
22	C10	0.606	0.58	0.226	0.256	0.603641	0.238744	Maybridge	BTB 11602	MAC-0007297
22	C11	0.592	0.578	0.212	0.251	0.595641	0.229244	Maybridge	BTB 11688	MAC-0007317
22	D2	0.635	0.64	0.256	0.261	0.648141	0.256244	Maybridge	BTB 10692	MAC-0006966
22	D3	0.622	0.622	0.252	0.257	0.632641	0.252244	Maybridge	BTB 10781	MAC-0006990
22	D4	0.62	0.625	0.248	0.245	0.633141	0.244244	Maybridge	BTB 10873	MAC-0007022
22	D5	0.63	0.621	0.266	0.26	0.636141	0.260744	Maybridge	BTB 11006	MAC-0007071
22	D6	0.633	0.619	0.28	0.274	0.636641	0.274744	Maybridge	BTB 11154	MAC-0007124
22	D7	0.616	0.594	0.267	0.268	0.615641	0.265244	Maybridge	BTB 11375	MAC-0153829
22	D8	0.647	0.577	0.266	0.259	0.622641	0.260244	Maybridge	BTB 11514	MAC-0007251
22	D9	0.603	0.548	0.253	0.257	0.586141	0.252744	Maybridge	BTB 11546	MAC-0153845
22	D10	0.582	0.568	0.23	0.257	0.585641	0.241244	Maybridge	BTB 11615	MAC-0007299
22	D11	0.579	0.56	0.223	0.242	0.580141	0.230244	Maybridge	BTB 11695	MAC-0007319
22	E2	0.636	0.634	0.251	0.255	0.645641	0.250744	Maybridge	BTB 10705	MAC-0006974
22	E3	0.623	0.618	0.251	0.256	0.631141	0.251244	Maybridge	BTB 10786	MAC-0000186
22	E4	0.605	0.595	0.255	0.249	0.610641	0.249744	Maybridge	BTB 10905	MAC-0153806
22	E5	0.615	0.606	0.259	0.253	0.621141	0.253744	Maybridge	BTB 11048	MAC-0007089
22	E6	0.597	0.603	0.257	0.26	0.610641	0.256244	Maybridge	BTB 11169	MAC-0007128
22	E7	0.614	0.598	0.251	0.249	0.616641	0.247744	Maybridge	BTB 11380	MAC-0007194
22	E8	0.606	0.563	0.242	0.258	0.595141	0.247744	Maybridge	BTB 11517	MAC-0007253
22	E9	0.582	0.55	0.225	0.245	0.576641	0.232744	Maybridge	BTB 11559	MAC-0007277
22	E10	0.573	0.574	0.211	0.236	0.584141	0.221244	Maybridge	BTB 11619	MAC-0007300
22	E11	0.563	0.569	0.21	0.231	0.576641	0.218244	Maybridge	BTB 11706	MAC-0007324
22	F2	0.641	0.638	0.24	0.245	0.650141	0.240244	Maybridge	BTB 10706	MAC-0006975
22	F3	0.627	0.616	0.256	0.264	0.632141	0.257744	Maybridge	BTB 10801	MAC-0153799
22	F4	0.622	0.618	0.253	0.264	0.630641	0.256244	Maybridge	BTB 10915	MAC-0007039
22	F5	0.632	0.599	0.267	0.27	0.626141	0.266244	Maybridge	BTB 11050	MAC-0007091
22	F6	0.626	0.593	0.245	0.252	0.620141	0.246244	Maybridge	BTB 11171	MAC-0007129
22	F7	0.619	0.551	0.241	0.255	0.595641	0.245744	Maybridge	BTB 11383	MAC-0007196
22	F8	0.61	0.552	0.234	0.253	0.591641	0.241244	Maybridge	BTB 11518	MAC-0007254
22	F9	0.585	0.548	0.227	0.251	0.577141	0.236744	Maybridge	BTB 11567	MAC-0007283
22	F10	0.544	0.547	0.224	0.25	0.556141	0.234744	Maybridge	BTB 11621	MAC-0007301
22	F11	0.57	0.571	0.217	0.232	0.581141	0.222244	Maybridge	BTB 11711	MAC-0007325
22	G2	0.636	0.63	0.258	0.256	0.643641	0.254744	Maybridge	BTB 10710	MAC-0006976
22	G3	0.61	0.63	0.24	0.247	0.630641	0.241244	Maybridge	BTB 10802	MAC-0006995
22	G4	0.621	0.615	0.24	0.243	0.628641	0.239244	Maybridge	BTB 10919	MAC-0007040
22	G5	0.618	0.608	0.253	0.25	0.623641	0.249244	Maybridge	BTB 11102	MAC-0007103
22	G6	0.616	0.553	0.249	0.251	0.595141	0.247744	Maybridge	BTB 11192	MAC-0007131
22	G7	0.626	0.525	0.266	0.26	0.586141	0.260744	Maybridge	BTB 11484	MAC-0007232
22	G8	0.582	0.543	0.235	0.264	0.573141	0.247244	Maybridge	BTB 11528	MAC-0007262
22	G9	0.578	0.559	0.222	0.25	0.579141	0.233744	Maybridge	BTB 11569	MAC-0007284
22	G10	0.557	0.564	0.209	0.226	0.571141	0.215244	Maybridge	BTB 11637	MAC-0007304
22	G11	0.57	0.576	0.205	0.246	0.583641	0.223244	Maybridge	BTB 11717	MAC-0007328
22	H2	0.673	0.658	0.237	0.255	0.676141	0.243744	Maybridge	BTB 10741	MAC-0006985
22	H3	0.661	0.634	0.244	0.251	0.658141	0.245244	Maybridge	BTB 10803	MAC-0006996
22	H4	0.65	0.617	0.252	0.246	0.644141	0.246744	Maybridge	BTB 10925	MAC-0007042
22	H5	0.65	0.601	0.271	0.277	0.636141	0.271744	Maybridge	BTB 11118	MAC-0007111
22	H6	0.651	0.568	0.242	0.25	0.620141	0.243744	Maybridge	BTB 11211	MAC-0007133
22	H7	0.621	0.545	0.252	0.269	0.593641	0.258244	Maybridge	BTB 11494	MAC-0007236
22	H8	0.599	0.559	0.241	0.269	0.589641	0.252744	Maybridge	BTB 11531	MAC-0007264
22	H9	0.591	0.591	0.22	0.258	0.601641	0.236744	Maybridge	BTB 11574	MAC-0007285
22	H10	0.583	0.602	0.213	0.237	0.603141	0.222744	Maybridge	AW 00916	MAC-0001542
22	H11	0.601	0.557	0.226	0.247	0.589641	0.234244	Maybridge	BTB 11718	MAC-0007329
23	A2	0.632	0.636	0.249	0.25	0.653903	0.236457	Maybridge	BTB 11724	MAC-0007331
23	A3	0.63	0.631	0.252	0.256	0.650403	0.240957	Maybridge	BTB 11783	MAC-0007357
23	A4	0.615	0.614	0.251	0.253	0.634403	0.238957	Maybridge	BTB 11852	MAC-0007396
23	A5	0.618	0.62	0.251	0.253	0.638903	0.238957	Maybridge	BTB 11976	MAC-0007455
23	A6	0.59	0.585	0.253	0.264	0.607403	0.245457	Maybridge	BTB 12023	MAC-0007473
23	A7	0.627	0.619	0.254	0.265	0.642903	0.246457	Maybridge	BTB 12121	MAC-0153906
23	A8	0.618	0.615	0.25	0.255	0.636403	0.239457	Maybridge	BTB 12226	MAC-0007547
23	A9	0.623	0.609	0.254	0.261	0.635903	0.244457	Maybridge	BTB 12339	MAC-0007589
23	A10	0.63	0.624	0.264	0.275	0.646903	0.256457	Maybridge	BTB 12395	MAC-0007611
23	A11	0.641	0.614	0.263	0.27	0.647403	0.253457	Maybridge	BTB 12453	MAC-0007632
23	B2	0.608	0.619	0.267	0.273	0.633403	0.256957	Maybridge	BTB 11737	MAC-0007336
23	B3	0.597	0.616	0.266	0.274	0.626403	0.256957	Maybridge	BTB 11798	MAC-0007368
23	B4	0.595	0.612	0.263	0.266	0.623403	0.251457	Maybridge	BTB 11857	MAC-0007402
23	B5	0.596	0.613	0.274	0.285	0.624403	0.266457	Maybridge	BTB 11978	MAC-0007457
23	B6	0.598	0.609	0.276	0.287	0.623403	0.268457	Maybridge	BTB 12054	MAC-0007487
23	B7	0.598	0.594	0.273	0.28	0.615903	0.263457	Maybridge	BTB 12125	MAC-0007513
23	B8	0.607	0.61	0.277	0.279	0.628403	0.264957	Maybridge	BTB 12298	MAC-0007579
23	B9	0.582	0.601	0.266	0.278	0.611403	0.258957	Maybridge	BTB 12341	MAC-0000190
23	B10	0.61	0.608	0.273	0.276	0.628903	0.261457	Maybridge	BTB 12408	MAC-0007614
23	B11	0.593	0.601	0.266	0.276	0.616903	0.257957	Maybridge	BTB 12466	MAC-0007641
23	C2	0.6	0.613	0.263	0.264	0.626403	0.250457	Maybridge	BTB 11747	MAC-0007340
23	C3	0.59	0.609	0.267	0.27	0.619403	0.255457	Maybridge	BTB 11803	MAC-0007369
23	C4	0.578	0.596	0.268	0.272	0.606903	0.256957	Maybridge	BTB 11869	MAC-0007409
23	C5	0.587	0.595	0.265	0.27	0.610903	0.254457	Maybridge	BTB 11983	MAC-0007459
23	C6	0.584	0.598	0.268	0.28	0.610903	0.260957	Maybridge	BTB 12055	MAC-0007488
23	C7	0.584	0.578	0.258	0.264	0.600903	0.247957	Maybridge	BTB 12142	MAC-0153908
23	C8	0.573	0.589	0.258	0.269	0.600903	0.250457	Maybridge	BTB 12310	MAC-0007582
23	C9	0.587	0.593	0.263	0.268	0.609903	0.252457	Maybridge	BTB 12347	MAC-0007595
23	C10	0.592	0.592	0.267	0.268	0.611903	0.254457	Maybridge	BTB 12411	MAC-0007616
23	C11	0.607	0.597	0.264	0.261	0.621903	0.249457	Maybridge	BTB 12485	MAC-0007648
23	D2	0.604	0.617	0.25	0.259	0.630403	0.241457	Maybridge	BTB 11748	MAC-0153869
23	D3	0.589	0.6	0.252	0.255	0.614403	0.240457	Maybridge	BTB 11813	MAC-0007373
23	D4	0.602	0.611	0.266	0.27	0.626403	0.254957	Maybridge	BTB 11876	MAC-0007415
23	D5	0.59	0.597	0.266	0.276	0.613403	0.257957	Maybridge	BTB 11985	MAC-0007461
23	D6	0.606	0.607	0.268	0.277	0.626403	0.259457	Maybridge	BTB 12061	MAC-0007491
23	D7	0.586	0.603	0.261	0.277	0.614403	0.255957	Maybridge	BTB 12160	MAC-0007524
23	D8	0.602	0.588	0.259	0.257	0.614903	0.244957	Maybridge	BTB 12314	MAC-0153917
23	D9	0.588	0.586	0.26	0.269	0.606903	0.251457	Maybridge	BTB 12360	MAC-0153925
23	D10	0.593	0.592	0.266	0.27	0.612403	0.254957	Maybridge	BTB 12413	MAC-0007617
23	D11	0.611	0.6	0.264	0.257	0.625403	0.247457	Maybridge	BTB 12500	MAC-0007649
23	E2	0.605	0.608	0.248	0.253	0.626403	0.237457	Maybridge	BTB 11751	MAC-0007342
23	E3	0.59	0.6	0.252	0.256	0.614903	0.240957	Maybridge	BTB 11814	MAC-0007374
23	E4	0.583	0.565	0.251	0.251	0.593903	0.237957	Maybridge	BTB 11904	MAC-0007439
23	E5	0.577	0.587	0.256	0.265	0.601903	0.247457	Maybridge	BTB 11990	MAC-0007462
23	E6	0.567	0.591	0.258	0.272	0.598903	0.251957	Maybridge	BTB 12090	MAC-0007499
23	E7	0.587	0.594	0.256	0.27	0.610403	0.249957	Maybridge	BTB 12190	MAC-0007526
23	E8	0.581	0.602	0.251	0.231	0.611403	0.227957	Maybridge	BTB 12316	MAC-0007583
23	E9	0.582	0.598	0.249	0.261	0.609903	0.241957	Maybridge	BTB 12361	MAC-0007598
23	E10	0.586	0.591	0.257	0.256	0.608403	0.243457	Maybridge	BTB 12415	MAC-0007619
23	E11	0.599	0.6	0.252	0.249	0.619403	0.237457	Maybridge	BTB 12512	MAC-0007651
23	F2	0.602	0.617	0.253	0.268	0.629403	0.247457	Maybridge	BTB 11763	MAC-0007344
23	F3	0.591	0.607	0.244	0.257	0.618903	0.237457	Maybridge	BTB 11833	MAC-0007382
23	F4	0.588	0.595	0.243	0.255	0.611403	0.235957	Maybridge	BTB 11964	MAC-0007448
23	F5	0.567	0.561	0.249	0.252	0.583903	0.237457	Maybridge	BTB 12009	MAC-0007470
23	F6	0.594	0.602	0.252	0.263	0.617903	0.244457	Maybridge	BTB 12093	MAC-0007502
23	F7	0.592	0.596	0.252	0.261	0.613903	0.243457	Maybridge	BTB 12197	MAC-0007528
23	F8	0.591	0.59	0.248	0.26	0.610403	0.240957	Maybridge	BTB 12321	MAC-0007584
23	F9	0.589	0.59	0.256	0.264	0.609403	0.246957	Maybridge	BTB 12376	MAC-0007604
23	F10	0.6	0.591	0.247	0.253	0.615403	0.236957	Maybridge	BTB 12419	MAC-0007623
23	F11	0.588	0.599	0.257	0.253	0.613403	0.241957	Maybridge	BTB 12517	MAC-0007652
23	G2	0.597	0.613	0.24	0.256	0.624903	0.234957	Maybridge	BTB 11765	MAC-0007346
23	G3	0.574	0.602	0.243	0.26	0.607903	0.238457	Maybridge	BTB 11848	MAC-0007392
23	G4	0.592	0.592	0.246	0.252	0.611903	0.235957	Maybridge	BTB 11965	MAC-0007449
23	G5	0.587	0.594	0.237	0.253	0.610403	0.231957	Maybridge	BTB 12016	MAC-0007471
23	G6	0.59	0.599	0.23	0.238	0.614403	0.220957	Maybridge	BTB 12100	MAC-0007503
23	G7	0.599	0.59	0.249	0.261	0.614403	0.241957	Maybridge	BTB 12201	MAC-0007531
23	G8	0.587	0.598	0.257	0.269	0.612403	0.249957	Maybridge	BTB 12336	MAC-0007587
23	G9	0.587	0.589	0.25	0.257	0.607903	0.240457	Maybridge	BTB 12380	MAC-0007606
23	G10	0.608	0.602	0.235	0.251	0.624903	0.229957	Maybridge	BTB 12422	MAC-0007624
23	G11	0.588	0.607	0.257	0.26	0.617403	0.245457	Maybridge	BTB 12533	MAC-0007658
23	H2	0.638	0.621	0.258	0.258	0.649403	0.244957	Maybridge	BTB 11770	MAC-0007348
23	H3	0.635	0.635	0.239	0.219	0.654903	0.215957	Maybridge	BTB 11850	MAC-0007394
23	H4	0.618	0.631	0.254	0.267	0.644403	0.247457	Maybridge	BTB 11968	MAC-0007451
23	H5	0.629	0.627	0.247	0.255	0.647903	0.237957	Maybridge	BTB 12021	MAC-0007472
23	H6	0.639	0.639	0.248	0.259	0.658903	0.240457	Maybridge	BTB 12101	MAC-0007504
23	H7	0.64	0.629	0.253	0.267	0.654403	0.246957	Maybridge	BTB 12202	MAC-0007532
23	H8	0.631	0.628	0.261	0.271	0.649403	0.252957	Maybridge	BTB 12338	MAC-0153921
23	H9	0.629	0.629	0.253	0.275	0.648903	0.250957	Maybridge	BTB 12384	MAC-0007608
23	H10	0.644	0.646	0.261	0.277	0.664903	0.255957	Maybridge	BTB 12428	MAC-0007627
23	H11	0.636	0.625	0.249	0.26	0.650403	0.241457	Maybridge	BTB 12541	MAC-0007662
24	A2	0.631	0.626	0.243	0.247	0.635178	0.245682	Maybridge	BTB 12542	MAC-0007663
24	A3	0.618	0.623	0.238	0.247	0.627178	0.243182	Maybridge	BTB 12621	MAC-0007679
24	A4	0.615	0.613	0.242	0.246	0.620678	0.244682	Maybridge	BTB 12650	MAC-0007699
24	A5	0.619	0.621	0.234	0.236	0.626678	0.235682	Maybridge	BTB 12682	MAC-0007714
24	A6	0.602	0.611	0.246	0.246	0.613178	0.246682	Maybridge	BTB 12754	MAC-0007730
24	A7	0.6	0.609	0.255	0.253	0.611178	0.254682	Maybridge	BTB 12794	MAC-0007743
24	A8	0.611	0.61	0.239	0.243	0.617178	0.241682	Maybridge	BTB 12846	MAC-0007754
24	A9	0.619	0.625	0.242	0.246	0.628678	0.244682	Maybridge	BTB 12919	MAC-0007782
24	A10	0.605	0.625	0.249	0.245	0.621678	0.247682	Maybridge	BTB 12990	MAC-0154010
24	A11	0.629	0.621	0.266	0.227	0.631678	0.247182	Maybridge	BTB 13034	MAC-0154018
24	B2	0.61	0.616	0.265	0.231	0.619678	0.248682	Maybridge	BTB 12549	MAC-0007666
24	B3	0.62	0.633	0.258	0.249	0.633178	0.254182	Maybridge	BTB 12625	MAC-0007682
24	B4	0.619	0.619	0.265	0.258	0.625678	0.262182	Maybridge	BTB 12651	MAC-0007700
24	B5	0.595	0.612	0.263	0.256	0.610178	0.260182	Maybridge	BTB 12683	MAC-0007715
24	B6	0.605	0.625	0.262	0.255	0.621678	0.259182	Maybridge	BTB 12759	MAC-0007732
24	B7	0.62	0.617	0.269	0.25	0.625178	0.260182	Maybridge	BTB 12796	MAC-0153987
24	B8	0.621	0.615	0.275	0.257	0.624678	0.266682	Maybridge	BTB 12847	MAC-0007755
24	B9	0.602	0.611	0.262	0.253	0.613178	0.258182	Maybridge	BTB 12921	MAC-0007783
24	B10	0.629	0.633	0.266	0.251	0.637678	0.259182	Maybridge	BTB 12993	MAC-0007807
24	B11	0.609	0.622	0.253	0.206	0.622178	0.230182	Maybridge	BTB 13042	MAC-0007837
24	C2	0.597	0.613	0.256	0.221	0.611678	0.239182	Maybridge	BTB 12577	MAC-0007670
24	C3	0.599	0.61	0.259	0.239	0.611178	0.249682	Maybridge	BTB 12626	MAC-0007683
24	C4	0.6	0.607	0.261	0.25	0.610178	0.256182	Maybridge	BTB 12653	MAC-0007701
24	C5	0.598	0.606	0.26	0.258	0.608678	0.259682	Maybridge	BTB 12689	MAC-0007716
24	C6	0.602	0.617	0.26	0.26	0.616178	0.260682	Maybridge	BTB 12773	MAC-0153980
24	C7	0.604	0.593	0.261	0.255	0.605178	0.258682	Maybridge	BTB 12798	MAC-0153988
24	C8	0.544	0.56	0.221	0.231	0.558678	0.226682	Maybridge	BTB 12851	MAC-0007757
24	C9	0.607	0.609	0.256	0.257	0.614678	0.257182	Maybridge	BTB 12931	MAC-0007784
24	C10	0.615	0.615	0.26	0.249	0.621678	0.255182	Maybridge	BTB 12996	MAC-0007808
24	C11	0.615	0.61	0.253	0.232	0.619178	0.243182	Maybridge	BTB 13060	MAC-0154020
24	D2	0.618	0.622	0.254	0.207	0.626678	0.231182	Maybridge	BTB 12600	MAC-0007671
24	D3	0.617	0.613	0.268	0.222	0.621678	0.245682	Maybridge	BTB 12634	MAC-0007688
24	D4	0.62	0.62	0.266	0.232	0.626678	0.249682	Maybridge	BTB 12656	MAC-0007703
24	D5	0.61	0.613	0.262	0.244	0.618178	0.253682	Maybridge	BTB 12704	MAC-0007721
24	D6	0.619	0.616	0.275	0.249	0.624178	0.262682	Maybridge	BTB 12778	MAC-0007738
24	D7	0.605	0.609	0.268	0.255	0.613678	0.262182	Maybridge	BTB 12823	MAC-0007749
24	D8	0.629	0.618	0.265	0.269	0.630178	0.267682	Maybridge	BTB 12858	MAC-0007760
24	D9	0.606	0.604	0.262	0.25	0.611678	0.256682	Maybridge	BTB 12947	MAC-0007790
24	D10	0.608	0.612	0.268	0.202	0.616678	0.235682	Maybridge	BTB 13000	MAC-0007811
24	D11	0.622	0.62	0.253	0.218	0.627678	0.236182	Maybridge	BTB 13064	MAC-0154021
24	E2	0.609	0.611	0.246	0.176	0.616678	0.211682	Maybridge	BTB 12605	MAC-0153950
24	E3	0.6	0.607	0.252	0.207	0.610178	0.230182	Maybridge	BTB 12638	MAC-0007691
24	E4	0.593	0.583	0.261	0.211	0.594678	0.236682	Maybridge	BTB 12666	MAC-0007706
24	E5	0.589	0.594	0.256	0.223	0.598178	0.240182	Maybridge	BTB 12725	MAC-0153974
24	E6	0.585	0.61	0.253	0.239	0.604178	0.246682	Maybridge	BTB 12779	MAC-0007739
24	E7	0.603	0.611	0.268	0.269	0.613678	0.269182	Maybridge	BTB 12828	MAC-0007751
24	E8	0.598	0.605	0.26	0.261	0.608178	0.261182	Maybridge	BTB 12859	MAC-0007761
24	E9	0.611	0.617	0.248	0.264	0.620678	0.256682	Maybridge	BTB 12959	MAC-0007795
24	E10	0.589	0.594	0.234	0.233	0.598178	0.234182	Maybridge	BTB 13012	MAC-0007820
24	E11	0.618	0.614	0.248	0.253	0.622678	0.251182	Maybridge	BTB 13079	MAC-0007845
24	F2	0.614	0.624	0.249	0.185	0.625678	0.217682	Maybridge	BTB 12606	MAC-0153951
24	F3	0.601	0.615	0.248	0.186	0.614678	0.217682	Maybridge	BTB 12639	MAC-0007692
24	F4	0.596	0.609	0.262	0.213	0.609178	0.238182	Maybridge	BTB 12674	MAC-0007710
24	F5	0.613	0.598	0.259	0.2	0.612178	0.230182	Maybridge	BTB 12743	MAC-0007726
24	F6	0.602	0.606	0.269	0.246	0.610678	0.258182	Maybridge	BTB 12782	MAC-0007740
24	F7	0.612	0.611	0.253	0.255	0.618178	0.254682	Maybridge	BTB 12835	MAC-0153991
24	F8	0.613	0.616	0.27	0.268	0.621178	0.269682	Maybridge	BTB 12878	MAC-0153999
24	F9	0.616	0.609	0.253	0.26	0.619178	0.257182	Maybridge	BTB 12965	MAC-0007798
24	F10	0.612	0.604	0.243	0.254	0.614678	0.249182	Maybridge	BTB 13014	MAC-0007822
24	F11	0.619	0.625	0.243	0.223	0.628678	0.233682	Maybridge	BTB 13086	MAC-0007846
24	G2	0.617	0.623	0.244	0.175	0.626678	0.210182	Maybridge	BTB 12617	MAC-0007676
24	G3	0.585	0.604	0.246	0.178	0.601178	0.212682	Maybridge	BTB 12644	MAC-0007693
24	G4	0.596	0.602	0.258	0.206	0.605678	0.232682	Maybridge	BTB 12680	MAC-0007712
24	G5	0.599	0.61	0.258	0.22	0.611178	0.239682	Maybridge	BTB 12747	MAC-0007727
24	G6	0.595	0.6	0.241	0.227	0.604178	0.234682	Maybridge	BTB 12784	MAC-0007741
24	G7	0.61	0.604	0.257	0.239	0.613678	0.248682	Maybridge	BTB 12836	MAC-0153992
24	G8	0.593	0.61	0.253	0.255	0.608178	0.254682	Maybridge	BTB 12889	MAC-0007770
24	G9	0.602	0.605	0.237	0.263	0.610178	0.250682	Maybridge	BTB 12979	MAC-0154008
24	G10	0.629	0.622	0.246	0.248	0.632178	0.247682	Maybridge	BTB 13024	MAC-0007830
24	G11	0.615	0.62	0.244	0.233	0.624178	0.239182	Maybridge	BTB 13166	MAC-0154024
24	H2	0.635	0.649	0.265	0.187	0.648678	0.226682	Maybridge	BTB 12618	MAC-0007677
24	H3	0.65	0.639	0.269	0.183	0.651178	0.226682	Maybridge	BTB 12646	MAC-0007695
24	H4	0.618	0.637	0.271	0.2	0.634178	0.236182	Maybridge	BTB 12681	MAC-0007713
24	H5	0.623	0.638	0.259	0.213	0.637178	0.236682	Maybridge	BTB 12749	MAC-0153977
24	H6	0.623	0.639	0.235	0.213	0.637678	0.224682	Maybridge	BTB 12792	MAC-0153985
24	H7	0.638	0.639	0.249	0.242	0.645178	0.246182	Maybridge	BTB 12840	MAC-0065268
24	H8	0.631	0.638	0.244	0.256	0.641178	0.250682	Maybridge	BTB 12918	MAC-0007781
24	H9	0.62	0.631	0.229	0.254	0.632178	0.242182	Maybridge	BTB 12981	MAC-0154009
24	H10	0.64	0.639	0.236	0.25	0.646178	0.243682	Maybridge	BTB 13031	MAC-0007835
24	H11	0.641	0.648	0.239	0.238	0.651178	0.239182	Maybridge	BTB 13170	MAC-0007881
25	A2	0.629	0.626	0.244	0.246	0.636316	0.269194	Maybridge	BTB 13172	MAC-0007883
25	A3	0.613	0.631	0.238	0.245	0.630816	0.265694	Maybridge	BTB 13329	MAC-0007942
25	A4	0.608	0.596	0.237	0.238	0.610816	0.261694	Maybridge	BTB 13395	MAC-0007986
25	A5	0.617	0.622	0.226	0.233	0.628316	0.253694	Maybridge	BTB 13429	MAC-0008003
25	A6	0.594	0.596	0.231	0.244	0.603816	0.261694	Maybridge	BTB 13475	MAC-0008031
25	A7	0.619	0.617	0.226	0.238	0.626816	0.256194	Maybridge	BTB 13535	MAC-0008058
25	A8	0.612	0.617	0.228	0.231	0.623316	0.253694	Maybridge	BTB 13703	MAC-0154074
25	A9	0.605	0.608	0.241	0.248	0.615316	0.268694	Maybridge	BTB 13776	MAC-0008205
25	A10	0.615	0.625	0.243	0.249	0.628816	0.270194	Maybridge	BTB 13819	MAC-0008230
25	A11	0.63	0.618	0.245	0.245	0.632816	0.269194	Maybridge	BTB 13844	MAC-0008245
25	B2	0.62	0.617	0.258	0.263	0.627316	0.284694	Maybridge	BTB 13197	MAC-0007896
25	B3	0.621	0.623	0.255	0.259	0.630816	0.281194	Maybridge	BTB 13332	MAC-0007944
25	B4	0.618	0.611	0.258	0.264	0.623316	0.285194	Maybridge	BTB 13399	MAC-0007989
25	B5	0.606	0.606	0.235	0.242	0.614816	0.262694	Maybridge	BTB 13449	MAC-0008011
25	B6	0.611	0.615	0.228	0.236	0.621816	0.256194	Maybridge	BTB 13476	MAC-0008032
25	B7	0.617	0.614	0.233	0.234	0.624316	0.257694	Maybridge	BTB 13547	MAC-0008066
25	B8	0.616	0.609	0.236	0.243	0.621316	0.263694	Maybridge	BTB 13706	MAC-0008151
25	B9	0.609	0.608	0.225	0.24	0.617316	0.256694	Maybridge	BTB 13779	MAC-0008207
25	B10	0.617	0.615	0.236	0.247	0.624816	0.265694	Maybridge	BTB 13824	MAC-0154091
25	B11	0.601	0.616	0.243	0.25	0.617316	0.270694	Maybridge	BTB 13851	MAC-0008252
25	C2	0.599	0.594	0.247	0.247	0.605316	0.271194	Maybridge	BTB 13274	MAC-0154028
25	C3	0.61	0.61	0.254	0.265	0.618816	0.283694	Maybridge	BTB 13334	MAC-0007945
25	C4	0.605	0.603	0.242	0.258	0.612816	0.274194	Maybridge	BTB 13405	MAC-0007991
25	C5	0.597	0.595	0.227	0.244	0.604816	0.259694	Maybridge	BTB 13450	MAC-0008012
25	C6	0.594	0.601	0.215	0.242	0.606316	0.252694	Maybridge	BTB 13490	MAC-0008036
25	C7	0.605	0.585	0.208	0.212	0.603816	0.234194	Maybridge	BTB 13552	MAC-0008071
25	C8	0.582	0.59	0.204	0.213	0.594816	0.232694	Maybridge	BTB 13719	MAC-0008161
25	C9	0.598	0.603	0.202	0.2	0.609316	0.225194	Maybridge	BTB 13799	MAC-0008217
25	C10	0.614	0.602	0.205	0.201	0.616816	0.227194	Maybridge	BTB 13825	MAC-0154092
25	C11	0.614	0.607	0.209	0.207	0.619316	0.232194	Maybridge	BTB 13858	MAC-0008254
25	D2	0.622	0.613	0.251	0.251	0.626316	0.275194	Maybridge	BTB 13279	MAC-0007926
25	D3	0.609	0.601	0.244	0.252	0.613816	0.272194	Maybridge	BTB 13360	MAC-0007959
25	D4	0.61	0.613	0.256	0.267	0.620316	0.285694	Maybridge	BTB 13411	MAC-0154045
25	D5	0.586	0.582	0.226	0.24	0.592816	0.257194	Maybridge	BTB 13455	MAC-0154053
25	D6	0.622	0.613	0.225	0.241	0.626316	0.257194	Maybridge	BTB 13496	MAC-0008039
25	D7	0.603	0.603	0.208	0.229	0.611816	0.242694	Maybridge	BTB 13553	MAC-0008072
25	D8	0.616	0.591	0.196	0.202	0.612316	0.223194	Maybridge	BTB 13740	MAC-0008169
25	D9	0.596	0.589	0.204	0.207	0.601316	0.229694	Maybridge	BTB 13802	MAC-0008219
25	D10	0.611	0.611	0.203	0.204	0.619816	0.227694	Maybridge	BTB 13826	MAC-0008235
25	D11	0.625	0.625	0.212	0.203	0.633816	0.231694	Maybridge	BTB 13859	MAC-0008255
25	E2	0.621	0.611	0.248	0.247	0.624816	0.271694	Maybridge	BTB 13280	MAC-0007927
25	E3	0.604	0.602	0.256	0.253	0.611816	0.278694	Maybridge	BTB 13373	MAC-0007969
25	E4	0.594	0.576	0.23	0.241	0.593816	0.259694	Maybridge	BTB 13413	MAC-0007993
25	E5	0.595	0.59	0.217	0.234	0.601316	0.249694	Maybridge	BTB 13456	MAC-0008017
25	E6	0.585	0.597	0.214	0.255	0.599816	0.258694	Maybridge	BTB 13508	MAC-0008043
25	E7	0.599	0.607	0.201	0.212	0.611816	0.230694	Maybridge	BTB 13555	MAC-0008074
25	E8	0.596	0.598	0.196	0.211	0.605816	0.227694	Maybridge	BTB 13751	MAC-0008175
25	E9	0.593	0.602	0.181	0.202	0.606316	0.215694	Maybridge	BTB 13803	MAC-0008220
25	E10	0.599	0.605	0.192	0.188	0.610816	0.214194	Maybridge	BTB 13829	MAC-0008237
25	E11	0.623	0.614	0.201	0.188	0.627316	0.218694	Maybridge	BTB 13863	MAC-0008257
25	F2	0.616	0.613	0.246	0.237	0.623316	0.265694	Maybridge	BTB 13282	MAC-0007929
25	F3	0.611	0.612	0.242	0.25	0.620316	0.270194	Maybridge	BTB 13381	MAC-0007975
25	F4	0.575	0.589	0.234	0.247	0.590816	0.264694	Maybridge	BTB 13414	MAC-0007994
25	F5	0.615	0.604	0.216	0.243	0.618316	0.253694	Maybridge	BTB 13459	MAC-0008020
25	F6	0.613	0.613	0.214	0.245	0.621816	0.253694	Maybridge	BTB 13517	MAC-0008045
25	F7	0.611	0.615	0.193	0.227	0.621816	0.234194	Maybridge	BTB 13559	MAC-0008077
25	F8	0.61	0.605	0.19	0.195	0.616316	0.216694	Maybridge	BTB 13757	MAC-0008179
25	F9	0.611	0.608	0.18	0.199	0.618316	0.213694	Maybridge	BTB 13804	MAC-0008221
25	F10	0.611	0.612	0.19	0.203	0.620316	0.220694	Maybridge	BTB 13830	MAC-0008238
25	F11	0.597	0.598	0.23	0.237	0.606316	0.257694	Maybridge	BTB 13881	MAC-0008262
25	G2	0.615	0.613	0.231	0.255	0.622816	0.267194	Maybridge	BTB 13291	MAC-0154032
25	G3	0.59	0.601	0.227	0.241	0.604316	0.258194	Maybridge	BTB 13385	MAC-0007979
25	G4	0.607	0.604	0.213	0.24	0.614316	0.250694	Maybridge	BTB 13424	MAC-0008000
25	G5	0.609	0.609	0.208	0.236	0.617816	0.246194	Maybridge	BTB 13461	MAC-0008021
25	G6	0.608	0.607	0.198	0.242	0.616316	0.244194	Maybridge	BTB 13518	MAC-0154064
25	G7	0.618	0.608	0.206	0.202	0.621816	0.228194	Maybridge	BTB 13571	MAC-0008082
25	G8	0.59	0.601	0.177	0.218	0.604316	0.221694	Maybridge	BTB 13758	MAC-0008180
25	G9	0.594	0.611	0.171	0.199	0.611316	0.209194	Maybridge	BTB 13805	MAC-0008222
25	G10	0.628	0.612	0.173	0.184	0.628816	0.202694	Maybridge	BTB 13831	MAC-0008239
25	G11	0.614	0.623	0.195	0.208	0.627316	0.225694	Maybridge	BTB 13883	MAC-0008264
25	H2	0.644	0.651	0.26	0.265	0.656316	0.286694	Maybridge	BTB 13322	MAC-0007940
25	H3	0.631	0.64	0.234	0.26	0.644316	0.271194	Maybridge	BTB 13390	MAC-0007984
25	H4	0.629	0.639	0.228	0.252	0.642816	0.264194	Maybridge	BTB 13426	MAC-0000202
25	H5	0.632	0.644	0.204	0.244	0.646816	0.248194	Maybridge	BTB 13472	MAC-0154057
25	H6	0.641	0.657	0.192	0.229	0.657816	0.234694	Maybridge	BTB 13534	MAC-0008057
25	H7	0.638	0.649	0.184	0.229	0.652316	0.230694	Maybridge	BTB 13697	MAC-0154073
25	H8	0.629	0.645	0.181	0.22	0.645816	0.224694	Maybridge	BTB 13772	MAC-0008203
[truncated: 28,723 more rows]
