# Supplementary material for: Discovery of a small molecule that inhibits bacterial ribosome biogenesis
Source: eLife. 2014 Sep 18;3:e03574. doi: 10.7554/eLife.03574 (PMC4371806; doi:10.7554/eLife.03574)
Supplement: Figure 4—source data 1. — DOI: http://dx.doi.org/10.7554/eLife.03574.013 [file elife03574s003.xlsx]

## Sheet: Figure 4 - source data 1
Figure 4 - source data 1. R-protein occupancy across sucrose gradients, normalized to the maximum value observed.
	DMSO1	DMSO2	DMSO3	DMSO4	DMSO5	DMSO6	DMSO7	DMSO8	DMSO9	DMSO10	DMSO11	DMSO12	DMSO13	DMSO14	DMSO29			DMSO11	DMSO12	DMSO13	DMSO14	DMSO15	DMSO16	DMSO17	DMSO18	DMSO19	DMSO20	DMSO21	DMSO22	DMSO23	DMSO24	DMSO25	DMSO26	DMSO29
S21	0	0	0.0138488	0.00300715	0.051441	0.17197	0.369131	0.568129	0.411033	0.205908	0.121489	0.0475525	0.0473319	0.0128354	0.501758		L35	0	0	0	0	0.014845	0	0.0209697	0	0.0292382	0.17737	0.146491	0.40223	0.215351	0.244508	0.169711	0.289403	0.695753
S2	0.00723038	0	0.025178	0.0233899	0.0753057	0.188193	0.484259	0.596708	0.544283	0.262953	0.196832	0.073096	0.0827891	0.0306019	0.492451		L36	0.0150505	0	0.000587702	0	0.0108038	0	0.0130826	0.251832	0.107474	0.438953	0.403565	0.879489	0.370872	0.528854	0.22017	0.441483	0.639056
S3	0	0	0.0227365	0.0048819	0.0615552	0.19835	0.476881	0.608887	0.498978	0.269499	0.142519	0.0719783	0.0623641	0.0343183	0.537273		L34	0.0275643	0.056644	0.0076388	0	0.0197667	0	0.122119	0.0570959	0.195247	0.417857	0.609946	0.730781	0.423636	0.371757	0.173943	0.509298	0.690143
S20L26	0.0138751	0.078296	0.0455313	0.0527844	0.087602	0.330397	0.562192	0.856299	0.625786	0.348889	0.195921	0.122805	0.101198	0.0610871	0.468619		L16	0.038352	0	0.0305346	0	0.0617667	0.0274399	0.05341	0.0369667	0.0811455	0.263247	0.364869	0.526624	0.327822	0.312817	0.181732	0.354493	0.699168
S11	0	0	0.0232625	0.0312095	0.0953396	0.315952	0.592812	0.826576	0.633477	0.345463	0.20742	0.0930702	0.0730157	0.0374415	0.513566		L30	0.0752017	0	0.0328596	0	0.0376443	0.0222935	0.0656494	0.0430388	0.140858	0.402692	0.565159	0.775616	0.471364	0.45765	0.207236	0.310059	0.665241
S12	0	0	0.0300908	0.0387455	0.106222	0.371748	0.621854	0.850629	0.640874	0.35472	0.200972	0.100682	0.080388	0.0456808	0.504004		L21	0.038385	0	0.0465444	0.0233119	0.072504	0.0960911	0.117735	0.169209	0.199704	0.532125	0.687677	0.848157	0.493448	0.4503	0.199655	0.335909	0.664078
S10	0.0078289	0.00731832	0.0227555	0.0544427	0.103301	0.369099	0.634129	0.836207	0.667384	0.36637	0.19365	0.100853	0.0814015	0.0467168	0.506179		L6	0.00789569	0	0.0163562	0	0.0298848	0	0.042899	0.0720851	0.127314	0.382574	0.542011	0.734851	0.444908	0.383112	0.202221	0.309781	0.680468
S9	0	0	0.0249172	0.0330312	0.106259	0.349298	0.639161	0.872571	0.676887	0.364204	0.204337	0.10103	0.0735816	0.0462953	0.51081		L28	0.0274321	0	0.0668729	0	0.0484317	0	0.0942349	0.0950358	0.166442	0.512261	0.744827	0.869325	0.544017	0.473001	0.256471	0.365846	0.707629
S17	0.0418827	0.0364755	0.0529283	0.0844734	0.114329	0.40096	0.65067	0.922277	0.683735	0.383094	0.220695	0.103738	0.0883108	0.0537879	0.519539		L9	0.0808576	0	0.0498684	0	0.0587936	0	0.0796413	0.095379	0.175035	0.52287	0.665561	0.866198	0.513586	0.454775	0.221084	0.355404	0.68184
S14	0	0.0331502	0.0363113	0.0352951	0.0858172	0.344823	0.673492	0.861915	0.645768	0.368474	0.212897	0.102756	0.0823253	0.0592183	0.540253		L25	0.0598125	0.00263755	0.0486174	0.0188384	0.0589341	0.0182583	0.117176	0.059966	0.172381	0.468617	0.552954	0.789661	0.454673	0.403068	0.242809	0.338898	0.662791
S5	0	0	0.0274946	0.0431823	0.106625	0.35661	0.638428	0.882957	0.653085	0.369109	0.202755	0.101946	0.076148	0.0523971	0.501761		L29	0.0581501	0	0.00263978	0	0.0349195	0.113286	0.0784473	0.167313	0.189284	0.507052	0.615362	0.86542	0.519396	0.476176	0.221427	0.412926	0.651063
S4	0.0213596	0.0264491	0.0429894	0.0658846	0.117872	0.365695	0.665002	0.895767	0.678402	0.36497	0.202063	0.108671	0.0927111	0.056016	0.511549		L32	0.0146127	0	0.061347	0	0	0.100919	0.0679371	0.0861291	0.163038	0.44397	0.647806	0.865063	0.231257	0.470057	0.208195	0.35034	0.680943
S19	0.0102946	0.0320501	0.0313125	0.0659743	0.114085	0.368332	0.727942	0.877063	0.733607	0.361858	0.208382	0.122301	0.0886083	0.063584	0.515787		L27	0.0577168	0	0.0308051	0.042228	0.0773007	0.033215	0.0527954	0.102278	0.164805	0.449993	0.585702	0.636397	0.518974	0.462344	0.256277	0.351088	0.641157
S13	0.00147221	0.00364416	0.0251377	0.0461365	0.109649	0.374594	0.618859	0.927395	0.696395	0.361851	0.209172	0.105673	0.0771002	0.0599132	0.50583		L33	0.222477	0.199864	0.196453	0.246956	0.10818	0.0601369	0.191903	0.103129	0.241847	0.401591	0.799386	0.73072	0.704173	0.390657	0.249358	0.311441	0.660618
S7	0	0	0.0275588	0.0443023	0.110861	0.361196	0.674574	0.902888	0.720766	0.351902	0.201072	0.102993	0.0904155	0.0484942	0.516387		L17	0.0626642	0	0.0383377	0	0.0651593	0.0536056	0.0794255	0.166379	0.189237	0.557984	0.676698	0.876188	0.516608	0.44641	0.221098	0.337073	0.68195
S16	0.00762487	0.00363412	0.0388675	0.0579551	0.117665	0.365388	0.649159	0.869779	0.64764	0.364676	0.203337	0.104293	0.0827472	0.0540182	0.506204		L7L12	0.025597	0	0.00548617	0	0.0204647	0	0.0193906	0	0.0697631	0.223419	0.329351	0.452945	0.30637	0.314036	0.15192	0.426557	0.670345
S8	0.0133738	0.0300944	0.0370796	0.0628719	0.114801	0.363425	0.65905	0.897795	0.662408	0.383716	0.20802	0.102902	0.0832859	0.0515178	0.504039		L14	0.010158	0	0.00599157	0	0.0155548	0	0.0655699	0.0995069	0.15805	0.523031	0.636102	0.86809	0.501498	0.46236	0.205433	0.363617	0.685759
S15	0.0155812	0.0186285	0.0333453	0.0531037	0.111549	0.377227	0.638769	0.889637	0.653785	0.367396	0.199078	0.099804	0.0750881	0.0473887	0.493821		L10	0.0085683	0.00809345	0.0117451	0.00839376	0.0245499	0.0539018	0.0338557	0.0363269	0.0960087	0.277012	0.399072	0.504041	0.36103	0.278956	0.185063	0.293316	0.687568
S6	0.00173757	0.00492773	0.0380082	0.0559759	0.115092	0.366297	0.676273	0.8968	0.682348	0.366787	0.210889	0.106104	0.0823864	0.0538042	0.510724		L15	0.0414457	0	0.0469399	0.0147728	0.102869	0.0680584	0.120261	0.146063	0.212951	0.564195	0.657083	0.862422	0.4784	0.47024	0.223406	0.328898	0.676457
S18	0	0.00130136	0.0394009	0.0549556	0.117966	0.404617	0.707629	1	0.740458	0.410326	0.222088	0.114768	0.0883666	0.0811015	0.4885		L2	0.0453575	0	0.0224374	0	0.0456358	0.00149952	0.0631882	0.0937275	0.166832	0.483252	0.65428	0.845663	0.539293	0.44868	0.225691	0.340722	0.673178
																	L22	0.0918821	0	0.0580315	0	0.112649	0.0723691	0.127806	0.17039	0.220667	0.569538	0.684909	0.982059	0.512835	0.498791	0.286551	0.359709	0.686448
																	L23	0.0223195	0.0906637	0.0770126	0.170437	0.0813769	0.180018	0.137438	0.224961	0.233165	0.574069	0.656507	0.870592	0.507399	0.470469	0.229523	0.398303	0.659653
																	L13	0.00942589	0	0.039427	0.0462019	0.0713625	0.0949964	0.119974	0.163139	0.198988	0.542707	0.670963	0.8745	0.49524	0.47603	0.230063	0.34259	0.65267
																	L20	0.115463	0.025081	0.0775045	0.122091	0.120014	0.123124	0.121409	0.200792	0.258154	0.581217	0.669431	0.8845	0.532104	0.484504	0.238635	0.37544	0.665596
																	L11	0.0754043	0.0065106	0.0581478	0.049609	0.0929111	0.139666	0.11258	0.197991	0.179876	0.480775	0.600938	0.738025	0.438212	0.394079	0.188514	0.329746	0.674402
																	L3	0.0266505	0	0.0432921	0.0511799	0.0947284	0.141252	0.112088	0.203065	0.197364	0.564943	0.676917	0.87507	0.496739	0.460118	0.213191	0.353355	0.667217
																	L4	0.0754025	0	0.0705114	0.0536386	0.0988247	0.186581	0.113525	0.224957	0.208098	0.551057	0.686672	0.871514	0.527152	0.495703	0.24378	0.349485	0.673512
																	L24	0.0654348	0.0984088	0.042986	0.0595518	0.0999198	0.179434	0.126571	0.183327	0.220376	0.541777	0.606788	0.868146	0.503843	0.467071	0.259005	0.359627	0.667978
																	L1	0.0450517	0.00381329	0.0393016	0.0556827	0.0887755	0.125934	0.130409	0.214243	0.203003	0.544063	0.656274	0.86909	0.503753	0.4663	0.225943	0.345092	0.677086
																	L18	0.0702904	0	0.0601737	0.0523246	0.0944124	0.116369	0.135543	0.191163	0.204078	0.565979	0.698196	0.849926	0.522973	0.465402	0.227819	0.370346	0.67579
																	L19	0.0890508	0.0398536	0.0609613	0.0316337	0.0735597	0.0740141	0.0834389	0.192274	0.21999	0.544981	0.439311	0.862617	0.382606	0.473236	0.262854	0.410049	0.675779
																	L31	0.0789554	0.0691066	0.0660314	0.110928	0.135718	0.164658	0.137435	0.256684	0.220319	0.593105	0.732002	1	0.583317	0.546837	0.272672	0.464823	0.799627
																	L5	0.138094	0.0909487	0.100718	0.111304	0.13153	0.15929	0.178976	0.280303	0.267206	0.632003	0.724285	0.945285	0.576427	0.519547	0.285215	0.419385	0.690362
	Lam1	Lam2	Lam3	Lam4	Lam5	Lam6	Lam7	Lam8	Lam9	Lam10	Lam11	Lam12	Lam13	Lam14	Lam29			Lam11	Lam12	Lam13	Lam14	Lam15	Lam16	Lam17	Lam18	Lam19	Lam20	Lam21	Lam22	Lam23	Lam24	Lam25	Lam26	Lam29
S21	0	0	0.0129163	0	0.0345214	0	0.139969	0.168533	0.303422	0.22983	0.187975	0.054761	0.0808455	0.0246624	0.501412		L35	0.000417381	0	0.0104745	0	0.00322793	0	0.0166786	0.0040341	0.043545	0.161737	0.147378	0.168268	0.0671854	0.11621	0.129549	0.143616	0.485244
S2	0	0	0.058846	0	0.102981	0.0144758	0.345101	0.435082	0.545952	0.428141	0.339913	0.188469	0.187282	0.0716014	0.517687		L36	0.0286775	0	0.0352362	0.100481	0.00277312	0	0.0820417	0.475469	0.108755	0.0929967	0.15852	0.33019	0.146983	0	0.310046	0	0.621525
S3	0	0	0.0764083	0	0.142402	0.206151	0.529887	0.676556	0.631461	0.577725	0.367782	0.287626	0.239864	0.116845	0.586776		L34	0.158421	0	0.0475974	0	0.0788957	0	0.144314	0.263295	0	0.416733	0.32376	0.241964	0.197244	0	0.161552	0.202274	0.450663
S20L26	0.118087	0.057662	0.123397	0.103002	0.219131	0.373877	0.558941	0.71442	0.684717	0.532263	0.38268	0.267135	0.194713	0.12024	0.504518		L16	0.120086	0.0488959	0.131416	0.133157	0.206929	0.123383	0.199052	0.179052	0.256069	0.298611	0.304287	0.232337	0.183726	0.142692	0.139695	0.159484	0.495042
S11	0	0.0433671	0.102866	0.109065	0.242727	0.376823	0.584978	0.73794	0.690905	0.592359	0.373627	0.292014	0.221507	0.126602	0.547213		L30	0.111213	0	0.159599	0.0807872	0.152344	0.128313	0.200469	0.252093	0.319823	0.41233	0.327866	0.24742	0.213541	0.150483	0.132989	0.145013	0.464058
S12	0	0.0141503	0.0873478	0.0827765	0.236875	0.410829	0.606316	0.782311	0.707772	0.617957	0.411849	0.30451	0.212512	0.128181	0.539646		L21	0.102321	0.0720157	0.206223	0.230751	0.346033	0.288571	0.290038	0.32643	0.356713	0.43868	0.354704	0.266186	0.19324	0.144684	0.139381	0.15387	0.452245
S10	0.0650544	0.0420964	0.0981277	0.136879	0.243438	0.495865	0.591678	0.815517	0.701691	0.655447	0.41948	0.334933	0.23393	0.141625	0.56497		L6	0.132296	0.0502964	0.286752	0.253229	0.326278	0.286151	0.30499	0.354662	0.389535	0.443905	0.381051	0.278046	0.212284	0.151991	0.134247	0.147763	0.470152
S9	0	0.0163757	0.0895807	0.133493	0.270669	0.472823	0.616619	0.818897	0.719342	0.628215	0.412128	0.318412	0.209126	0.138474	0.542103		L28	0.158055	0.0757706	0.266334	0.144922	0.274318	0.217015	0.301386	0.366058	0.46326	0.519603	0.485952	0.330863	0.347853	0.200061	0.196683	0.223873	0.540341
S17	0.021558	0.0411409	0.173563	0.153338	0.33358	0.512447	0.596079	0.791766	0.672737	0.635074	0.450532	0.304316	0.303249	0.151517	0.567247		L9	0.143632	0.116021	0.302146	0.3154	0.476943	0.363042	0.336892	0.3649	0.398917	0.466423	0.402013	0.300345	0.254382	0.164548	0.152182	0.16799	0.467174
S14	0.0263957	0.0943812	0.199138	0.183326	0.30629	0.509848	0.727374	0.84987	0.752439	0.650126	0.445231	0.302436	0.268258	0.185926	0.613901		L25	0.197347	0.168619	0.392231	0.3436	0.51864	0.368522	0.372133	0.335924	0.365771	0.404743	0.384499	0.263273	0.215671	0.138788	0.145262	0.133966	0.47014
S5	0.0238519	0.060911	0.142295	0.208757	0.323919	0.544834	0.684217	0.867732	0.766137	0.646216	0.426222	0.337493	0.251529	0.174593	0.546786		L29	0.147289	0	0.32767	0.279225	0.450458	0.407271	0.434268	0.477788	0.462009	0.481284	0.402776	0.311552	0.235377	0.154749	0.163283	0.190674	0.465333
S4	0.0494691	0.083669	0.138128	0.212477	0.340774	0.547694	0.668378	0.836538	0.756863	0.634978	0.424498	0.322211	0.251259	0.15059	0.542791		L32	0.249412	0.0737422	0.410448	0.170841	0.50459	0.355939	0.424649	0.400636	0.447337	0.454956	0.433612	0.286621	0.271767	0.217661	0.143658	0.165322	0.47461
S19	0	0.0327168	0.13282	0.197062	0.308739	0.545861	0.703761	0.852083	0.734284	0.660028	0.414555	0.328108	0.271096	0.147039	0.545436		L27	0.18071	0.179214	0.387038	0.408252	0.605117	0.437542	0.436706	0.4141	0.393092	0.429518	0.387283	0.27737	0.221563	0.151471	0.150397	0.173835	0.478418
S13	0.0463229	0.046168	0.175208	0.266011	0.373793	0.564617	0.710826	0.870238	0.759918	0.656467	0.425848	0.331903	0.278495	0.149231	0.537729		L33	0.632225	0.133158	0.571437	0.401854	0.792368	0.336588	0.412459	0.312131	0.488831	0.462623	0.473571	0.300154	0.361465	0.211435	0.182412	0.198587	0.478196
S7	0.0225044	0.0705631	0.20446	0.270418	0.373721	0.606774	0.721066	0.859626	0.742562	0.624432	0.409063	0.313589	0.265803	0.149722	0.54763		L17	0.116103	0.124516	0.33211	0.396213	0.66373	0.510612	0.477509	0.523297	0.486724	0.538118	0.419937	0.322642	0.2694	0.189966	0.147552	0.168498	0.45744
S16	0.0935881	0.153596	0.220896	0.325008	0.389958	0.62418	0.694155	0.862429	0.755128	0.635497	0.416557	0.329387	0.240019	0.141539	0.552801		L7L12	0.090628	0.198366	0.463888	0.479493	0.561231	0.553131	0.400714	0.532017	0.448084	0.486187	0.362339	0.256939	0.208429	0.168515	0.146433	0.205776	0.479411
S8	0.138493	0.187324	0.25275	0.371438	0.413441	0.677393	0.707714	0.889996	0.748238	0.635507	0.421177	0.357145	0.239518	0.155493	0.536603		L14	0.121425	0.133367	0.422627	0.468807	0.67973	0.543077	0.484372	0.501608	0.458576	0.510557	0.411756	0.321624	0.2408	0.179942	0.147737	0.153731	0.475788
S15	0.153571	0.192603	0.2513	0.390893	0.428395	0.684033	0.717799	0.877475	0.761312	0.652173	0.417948	0.330219	0.228607	0.169279	0.544688		L10	0.228242	0.245543	0.443751	0.456769	0.632734	0.499002	0.458906	0.483028	0.470903	0.509217	0.442814	0.335498	0.287051	0.207943	0.187122	0.195929	0.489312
S6	0.119519	0.176045	0.25066	0.374237	0.434257	0.704302	0.743171	0.907684	0.761211	0.664023	0.437081	0.34825	0.263076	0.186782	0.554692		L15	0.205239	0.243558	0.551636	0.541777	0.808757	0.613246	0.554694	0.577368	0.538622	0.568591	0.459646	0.343121	0.287212	0.202648	0.178972	0.174758	0.474911
S18	0.11994	0.173306	0.301621	0.402999	0.51504	0.793008	0.883089	1	0.881229	0.726341	0.494656	0.372044	0.333242	0.214963	0.542947		L2	0.168522	0.206336	0.483882	0.537889	0.819741	0.624341	0.555686	0.581388	0.548591	0.568738	0.493354	0.366285	0.290066	0.214631	0.183249	0.191045	0.471436
																	L22	0.156946	0.200405	0.514126	0.534398	0.763931	0.610383	0.549072	0.574965	0.521961	0.552811	0.460137	0.345111	0.263661	0.195381	0.170255	0.174841	0.466592
																	L23	0.139463	0.248797	0.516303	0.517111	0.79994	0.587079	0.560276	0.538418	0.52631	0.541136	0.447326	0.345956	0.290259	0.184542	0.157869	0.160701	0.430452
																	L13	0.212936	0.24415	0.480711	0.566204	0.783751	0.610785	0.527612	0.553433	0.497843	0.553539	0.439595	0.339093	0.27328	0.185597	0.174014	0.16146	0.459757
																	L20	0.241175	0.262155	0.566674	0.581916	0.833545	0.622388	0.551597	0.577809	0.533657	0.559545	0.468929	0.349535	0.283455	0.207256	0.175281	0.169517	0.463764
																	L11	0.251678	0.323327	0.605224	0.577025	0.836118	0.612779	0.54802	0.553625	0.51301	0.534549	0.455065	0.331762	0.279223	0.19112	0.161728	0.189155	0.483035
																	L3	0.322326	0.3555	0.627756	0.61052	0.852533	0.652342	0.564477	0.594968	0.528115	0.572749	0.46321	0.351415	0.28544	0.219756	0.19194	0.198677	0.469077
																	L4	0.204288	0.282104	0.585537	0.579337	0.884669	0.638487	0.581869	0.582164	0.543919	0.565521	0.479183	0.352536	0.299198	0.21531	0.192665	0.19834	0.470819
																	L24	0.29189	0.320189	0.570343	0.578183	0.866488	0.642682	0.560953	0.556943	0.533828	0.550597	0.49292	0.359188	0.317916	0.22024	0.188217	0.198271	0.461105
																	L1	0.277497	0.325148	0.598418	0.598169	0.860911	0.647774	0.563097	0.592389	0.533032	0.564723	0.471078	0.357898	0.275273	0.214911	0.187754	0.188249	0.471919
																	L18	0.284098	0.308083	0.642046	0.586551	0.851024	0.658763	0.55872	0.595411	0.52854	0.57034	0.465181	0.358121	0.282399	0.221103	0.176404	0.1724	0.467307
																	L19	0.347052	0.506483	0.683602	0.617517	0.895015	0.631695	0.554284	0.547536	0.540579	0.543594	0.460197	0.333499	0.26129	0.196902	0.181855	0.216241	0.467092
																	L31	0.31819	0.418801	0.734048	0.697131	1	0.738267	0.63811	0.626711	0.612691	0.616921	0.525696	0.409485	0.334783	0.256653	0.247987	0.25018	0.556248
																	L5	0.348033	0.431764	0.779695	0.658356	0.988706	0.734841	0.663746	0.701787	0.646637	0.690622	0.594195	0.484352	0.428299	0.359723	0.328031	0.323814	0.485496
