# Supplementary material for: Discovery of a small molecule that inhibits bacterial ribosome biogenesis
Source: eLife. 2014 Sep 18;3:e03574. doi: 10.7554/eLife.03574 (PMC4371806; doi:10.7554/eLife.03574)
Supplement: Figure 6—source data 1. — Synthesis rates are log2 transformed after normalization to the measured synthesis rate of E. coli in the presence of DMSO. Growth rates are reported as 1/doubling time (hr). DOI: http://dx.doi.org/10.7554/eLife.03574.019 [file elife03574s004.xlsx]

## Sheet: Figure 6 - source data 1
Figure 6 - source data 1. In vivo r-protein synthesis rates measured using qMS.
Synthesis rates are log2 transformed after normalization to the measured synthesis rate of E. coli in the presence of DMSO.
Growth rates are reported as 1/doubling time (hours).
condition	growth rate	L1	L2	L3	L4	L5	L6	L7L12	L9	L10	L11	L13	L14	L15	L16	L17	L18	L19	L20	L21	L22	L23	L24	L25	L27	L28	L29	L30	L32	L33	L35
lam2x	0.0513538	0.452292	0.251783	0.311102	-0.0781583	0.84701	-0.207134	0.149251	0.116271	0.395271	0.367695	0.591969	0.278799	0.448256	0.520239	0.346318	0.51112	0.521647	0.430642	0.149425	0.226869	0.322115	0.137438	0.246297	0.489009	0.567296	0.144627	0.271858	0.412029	0.300129	0.296149
lam3x	0.0515736	0.178104	0.260751	0.199582	0.151021	0.745754	-0.129996	-0.0908646	-0.0439067	0.0958898	0.338501	0.180843	-0.11324	0.267228	0.131775	0.0771207	0.265378	0.266004	0.0660656	0.00401859	0.168036	0.37308	0.0499045	0.048101	0.0933811	0.512127	-0.128459	0.226524	0.0213578	0.415291	0.363782
lam4x	0.0506295	0.184692	0.331982	0.175165	0.170765	0.927431	-0.126152	-0.070723	-0.158274	-0.02025	0.426468	0.211379	-0.0279342	0.432518	0.404129	0.140745	0.269783	0.13345	0.0761571	0.346783	0.112075	0.337268	-0.0095383	0.157372	0.0298495	0.643255	-0.280194	0.272394	0.223567	0.455263	0.189664
lam5x	0.0495915	0.144174	0.305108	0.176317	0.299779	0.83458	-0.316728	-0.217754	-0.216084	-0.00182801	0.403834	0.222808	-0.145947	0.280839	0.192976	-0.0488559	0.233468	0.0613699	0.261799	0.0855648	0.22535	0.196741	0.0383218	0.0171105	-0.00434673	0.517356	-0.248166	0.180436	-0.0699058	0.399468	0.0809503
lam6x	0.0488799	0.352406	0.444194	0.319288	0.357924	1.24975	-0.171114	0.204053	0.0677107	0.294987	0.500085	0.569651	-0.111956	0.435728	0.255322	0.00740102	0.516315	0.486273	0.230056	0.105678	0.39383	0.384828	0.191415	0.303882	0.237338	0.73619	-0.252806	0.447483	0.167309	0.556986	0.0740004
condition	growth rate	L1	L2	L3	L4	L5	L6	L7L12	L9	L10	L11	L13	L14	L15	L16	L17	L18	L19	L20	L21	L22	L23	L24	L25	L27	L28	L29	L30	L32	L33	L35
cam2x	0.0393288	0.297729	0.313448	0.468856	0.0196958	2.15771	0.145666	0.37488	0.527083	0.338746	0.706322	0.674765	0.373361	-0.150758	0.142955	1.19813	0.449441	0.330853	0.519693	-0.0139773	-0.0753774	0.291862	0.933096	0.524117	0.181485	0.761699	-0.520734	0.170018	-0.0231689	0.280382	0.126571
cam3x	0.0359008	0.00206457	-0.313103	0.107824	-0.119068	1.73227	-0.298101	-0.209761	-0.317085	0.037846	0.440678	-0.0915778	-0.0335299	-0.486015	-1.05401	-0.0517088	-0.255217	-0.14126	-0.256234	-0.112569	-0.407291	-0.123857	0.339441	0.354513	-0.596016	0.377086	-1.11981	-0.422321	-0.383371	-0.0569929	-0.673942
cam4x	0.0296226	-0.420908	-0.606139	-0.207063	-0.426384	1.38178	-0.430245	-0.577798	-0.606719	-0.708506	0.39645	-0.461417	-0.315983	-0.745499	-1.49454	-0.213915	-0.648162	-0.689918	-0.474688	-0.452323	-1.07047	-0.360058	-0.0742232	0.153611	-0.810943	0.133243	-1.48083	-0.888632	-0.875762	-0.301388	-0.558234
cam5x	0.0258151	-0.734247	-0.912934	-0.397826	-0.674745	1.07196	-0.884926	-0.769824	-0.909812	-0.638442	0.108876	-0.821957	-0.714022	-1.4483	-1.38342	-0.356959	-0.940799	-0.715959	-0.808549	-0.709961	-1.26479	-0.839305	-0.480926	0.0646058	-0.981966	-0.204457	-1.71684	-1.29269	-0.996111	-0.635401	-1.20005
cam6x	0.022364	-1.00098	-1.62079	-0.750089	-1.17164	0.761552	-1.4599	-0.678623	-1.25201	-0.899585	-0.146912	-1.15165	-1.1766	-1.86721	-2.32468	-0.996423	-1.42838	-1.14814	-1.51794	-1.12461	-1.88014	-1.32439	-1.01559	-0.199082	-1.76535	-0.572089	-2.31961	-1.56774	-1.28387	-0.982211	-1.80931
condition	growth rate	S1	S2	S3	S4	S5	S6	S7	S8	S9	S10	S11	S12	S13	S14	S15	S16	S18	S19	S20L26	S21
lam2x	0.0513538	0.11282	0.205954	0.381477	0.374255	0.317349	0.123991	0.326339	0.941311	0.638422	0.288951	0.160904	-0.00690237	-0.0469687	0.407914	0.167339	0.250397	0.567697	0.236529	0.457495	-0.258948
lam3x	0.0515736	-0.0641312	-0.00984949	0.0759776	-0.030645	0.222055	0.259111	0.119018	0.251495	0.156614	0.191799	0.196279	0.102664	0.154336	0.466552	0.29802	0.140294	0.234236	0.317145	0.951456	-0.40905
lam4x	0.0506295	-0.180215	-0.019408	0.0532062	-0.0352172	0.375106	0.231304	0.336865	-0.0656573	0.218836	0.244088	0.0649735	0.0897758	0.298645	0.471417	0.273469	0.217443	0.232363	0.215611	1.22252	-0.843383
lam5x	0.0495915	-0.276725	-0.240822	0.0175722	-0.173606	0.281956	0.245833	0.136377	-0.0619361	0.229646	0.17482	-0.0788996	-0.0764833	0.107883	0.350287	0.153027	0.146028	0.517081	0.125158	1.27451	-1.26639
lam6x	0.0488799	-0.0294342	-0.0411637	0.157272	-0.026864	0.438068	0.410886	0.265458	0.318416	0.471963	0.354443	0.0555794	0.0450142	0.269328	0.621265	0.373659	0.370694	0.488831	0.320021	1.39738	-0.549263
condition	growth rate	S1	S2	S3	S4	S5	S6	S7	S8	S9	S10	S11	S12	S13	S14	S15	S16	S18	S19	S20L26	S21
cam2x	0.0393288	-0.56199	-0.114006	-0.323647	0.183212	0.0119846	0.373313	0.763567	0.837042	0.660602	0.441754	0.199897	-0.18486	0.186554	0.738404	0.425666	0.192339	0.90661	0.158327	0.113696	-0.0934752
cam3x	0.0359008	-0.98734	-0.649675	-1.00657	-0.32237	-0.40797	0.218135	-0.0310444	-0.0651623	-0.227942	0.239854	-0.428251	-0.409623	0.160246	0.305022	0.420718	-0.196121	0.393476	-0.175624	-0.338427	-0.807188
cam4x	0.0296226	-1.69219	-1.0001	-1.50248	-0.568572	-0.611933	-0.0126095	-0.119657	-0.486916	-0.591938	-0.39519	-0.433788	-1.13842	-0.124078	-0.0676404	0.191994	-0.53473	0.276981	-0.508965	-0.388927	-1.46861
cam5x	0.0258151	-2.15048	-1.40791	-2.00916	-1.01531	-1.19857	-0.131765	-0.51724	-0.786024	-1.0815	-0.469041	-0.867349	-1.5667	-1.25786	-0.455731	0.0414174	-0.913388	-0.185676	-0.675922	-0.992269	-1.93437
cam6x	0.022364	-2.21899	-1.64442	-2.39095	-1.14931	-1.65735	-0.426107	-0.919226	-1.3077	-1.65587	-0.851821	-1.43729	-2.22058	-0.716247	-0.852522	-0.179681	-1.72368	-0.497664	-1.53017	-1.5523	-2.52945
