# Supplementary material for: Discovery of a small molecule that inhibits bacterial ribosome biogenesis
Source: eLife journal article supplement (doi:10.7554/elife.03574), 2014-09-18

Figure 5 – figure supplement 1

A

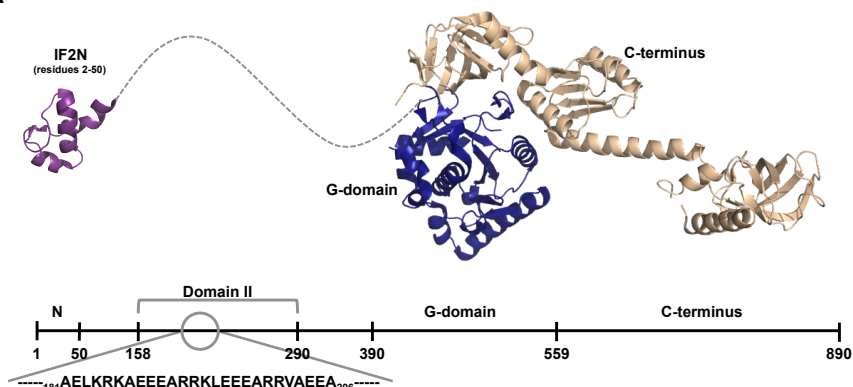

B

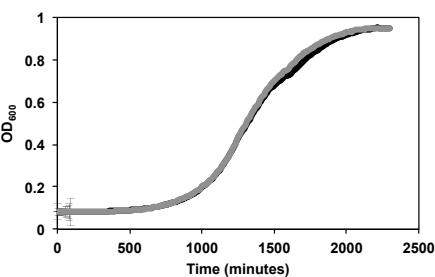

C

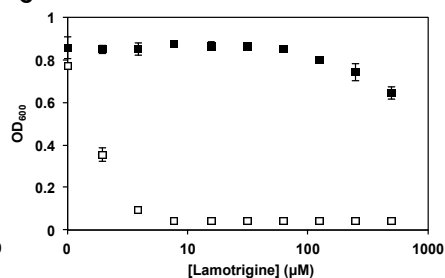

D

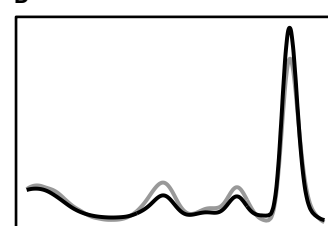

E

Enterococcus faecalis/1-798 -----  
Escherichia coli BW25113/1-890 AELKRKAEEEEARRKLEEEARRVAEEA  
Citrobacter rodentium/1-894 AELKRKAEEEEARRKLEEEARRVAEEA  
Salmonella enterica/1-892 AELKRKAEEEEARRKLEEEARRVAEEA  
Enterobacter cancerogenus/1-895 AELKRKAEEEEARRKLEEEARRVAEEA  
Pseudomonas aeruginosa/1-840 -----AEPVAKPAAVEERKK--EEP  
Acinetobacter baumannii/1-904 AQLKATEEAVRRKAAEEAQQTLEQM

F

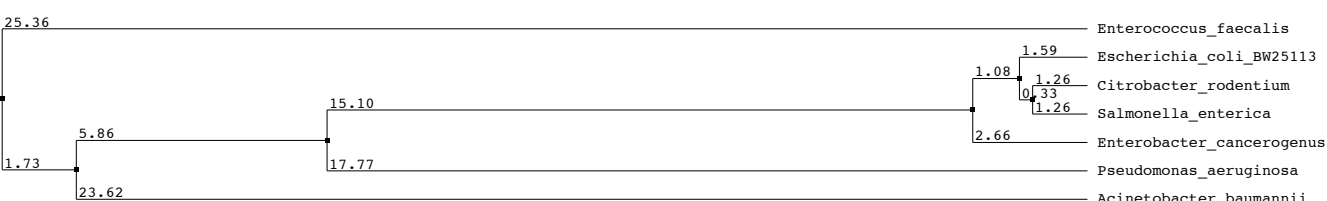

Supplement: supp [file elife_poa_e03574_Figure_5_figure_supplement_1.pdf › elife_poa_e03574_Figure_5_figure_supplement_1.pdf]
