# Supplementary material for: Discovery of a small molecule that inhibits bacterial ribosome biogenesis
Source: eLife. 2014 Sep 18;3:e03574. doi: 10.7554/eLife.03574 (PMC4371806; doi:10.7554/eLife.03574)
Supplement: Supplementary file 1. — Related to Figure 1. Identification of previously reported cold sensitive ribosome biogenesis genes. All genes presented have been reported as cold sensitive. The Comments column describes whether each gene deletion strain displayed cold sensitivity in our screen of the Keio collection. DOI: http://dx.doi.org/10.7554/eLife.03574.022 [file elife03574s005.xlsx]

## Sheet: Supplementary File 1A
Supplementary File 1A - related to Figure 1. Comprehensive list of cold sensitive E. coli Keio strains.
		Blattner Number	Gene	Growth Senstivity	Function
Information Storage and Processing
	Translation, ribosome structure and biogenesis
		B3170	rimP	1.72243	30S biogenesis factor
		B0082	mraW	1.77981	16S rRNA methyltransferase
		B0859	rlmC	1.80553	23S methyltransferase
		B2185	rplY	1.80612	Ribosomal protein L25
		B3180	yhbY	1.8071	50S binding protein
		B3165	rpsO	1.88115	Ribosomal protein S15
		B4375	prfC	2.26132	Peptide chain release factor
		B3065	rpsU	2.41932	Ribosomal Protein S21
		B1133	trmU	2.94762	tRNA modification
		B2594	rluD	4.09942	23S pseudouridine synthase
		B3470	sirA	4.31095	tRNA modification
		B3162	deaD	5.36532	DEAD box RNA helicase
		B4161	rsgA	5.38086	30S biogensis factor
		B3345	tusD	7.1632	tRNA modification
		B3871	bipA	7.85131	30S biogenesis factor
		B4129	lysU	7.86048	lysyl-tRNA synthase
		B0051	ksgA	8.45619	16S rRNA methyltransferase
		B3984	rplA	9.74782	Ribosomal protein L1
		B3164	pnp	9.75118	mRNA degradation factor
		B3167	rbfA	12.2822	30S binding protein
		B3344	tusC	12.8828	tRNA modification
		B2608	rimM	14.1564	Ribosome maturation protein
		B3343	tusB	16.4188	tRNA modification
		B0852	rimK	21.3679	S6 protein modification
	DNA replication, recombination and repair
		B2496	had	1.71185	Regulator of DnaA
		B0454	atl	1.72368	DNA base flipping
		B3778	rep	1.7468	DNA helicase
		B2820	recB	1.76773	DNA helicase
		B2002	yeeS	1.77341	Similar to radC helicase
		B0779	uvrB	1.85913	DNA nucleotide excision repair
		B0215	dnaQ	1.90304	DNA polymerase
		B2822	recC	1.9405	DNA helicase
		B0714	nei	2.27039	DNA base excision repair
		B2699	recA	6.36017	SOS response regulatory protein
		B0214	rnhA	12.1925	DNA-RNA hybrid degradation
	Transcription
		B1508	hipB	1.72013	Transcriptional regulator
		B3261	fis	2.5161	DNA-binding protein
		B0313	betI	2.66032	Trancriptional repressor of glycine betaine biosynthesis
		B4172	hfq	5.21052	RNA binding protein
		B0564	appY	5.75121	Acid phosphatase transcriptional regulator
		B3067	rpoD	7.68861	Sigma70
		B3743	asnC	9.72477	Asparagine dependent transcriptional regulator
		B3190	yrbA	10.2424	Predicted DNA binding protein
Cellular Processes
	Cell envelope, outmembrane biogenesis
		B2742	nlpD	1.75239	Putative outermembrane lipoprotein
		B3621	rfaC	1.77186	LPS biosynthesis
		B3620	rfaF	1.84752	LPS biosynthesis
		B3035	tolC	1.8732	Outer membrane channel
		B0632	dacA	1.98461	D-ala-D-ala carboxypeptidase
		B0987	gfcA	2.05299	Capsule production
		B3842	rfaH	2.86854	LPS biosynthesis
		B0200	gmhB	2.92422	LPS biosynthesis
		B3052	rfaE	3.24854	LPS biosynthesis
		B0222	lpcA	3.32131	LPS biosynthesis
		B0293	matB	3.40261	Conserved fimbrillin
		B2049	manC	4.61106	Colanic acid biosynthesis
		B3201	lptB	5.28679	LPS biosynthesis
		B3506	slp	50.1634	Starvation lipoprotein
		B0741	pal	105.011	Peptidoglycan asscociated OMP
	Inorganic ion transport
		B0585	fes	1.70666	Enterochelin esterase
		B2764	cysJ	1.76688	Sulfite reductase flavoprotein
		B1757	ynjE	2.30159	Predicted thiosulphate sulphur transferase
		B1102	fhuE	2.54807	Outer membrane receptor for iron uptake
		B3290	trkA	4.01972	K+ transporter
	Signal Transduction
		B4399	creC	1.75676	TCS involved in sugar metabolism
		B1341	ydaM	1.77167	c-DiGMP responsive transcriptional regulator
		B4398	creB	2.77582	TCS involved in sugar metabolism
		B0049	apaH	3.48404	Diadenosine tetraphosphatase
		B0145	dksA	4.12332	RNAP-binding transcription factor
		B2218	rcsC	4.85835	TCS Involved in colanic acid biosynthesis
	Cell motility and secretion
		B1881	cheZ	1.71016	Chemotaxis regulator
		B1884	cheR	1.8475	Chemotaxis methyltransferase
		B1947	fliO	2.5236	Flagellar biosynthesis
		B1885	tap	2.75864	Chemotaxis protein
		B3609	secB	3.6229	Protein secretion
	Protein turnover
		B1829	htpX	2.14858	Inner membrane heat shock protein
		B2269	elaD	2.27561	Deubiquitniase
	Division & chromosome partitioning
		B2213	mrp	2.62535	DNA damage repair regulator
Metabolism
	Energy production and conversion
		B0973	hyaB	1.8325	Hydrogenase
		B0621	dcuC	1.85939	Dicarboxylate transporter
		B1241	adhE	1.92885	Alchohol dehydrogenase
		B2236	yfaE	1.95206	Fe-S protein
		B3732	atpD	2.07959	ATP synthase
		B3115	tdcD	2.43433	Propionate kinase
		B3734	atpA	2.56901	ATP synthase
		B3738	atpB	3.27485	ATP synthase
		B3736	atpF	4.47783	ATP synthase
		B3737	atpE	4.66405	ATP synthase
		B2488	hyfH	5.91979	Hydrogenase
		B0720	gltA	8.93835	Citrate synthase
		B2463	maeB	30.3588	Malate dehydrogenase
		B0306	ykgE	50.5255	Predicted oxidoreductase
	Co-enzyme metabolism
		B0662	ubiF	1.73435	Ubiquinone biosynthesis
		B3997	hemE	1.89956	Porphyrin biosynthesis
		B0009	mog	1.93539	Predicted Molybdochelatase
		B0613	citG	2.0345	Predicted feroxin like protein (Fe-S)
		B2311	ubiX	2.33734	Ubiquinone biosynthesis
		B3177	folP	2.54906	Dihydropteroate synthase
		B2232	ubiG	2.82896	Ubiquinone biosynthesis
		B1638	pdxH	3.14499	Pyridoxine biosynthesis
		B3833	ubiE	3.8139	Ubiquinone biosynthesis
		B2907	ubiH	3.83007	Ubiquinone biosynthesis
		B3058	folB	5.58659	THF biosynthesis
		B0628	lipA	6.84376	Lipoate synthase
	Amino acid transport and metabolism
		B2530	iscS	1.72412	Cysteine desulfurase
		B1293	sapB	1.73215	Peptide transporter
		B1453	ansP	1.7775	Asparagine biosynthesis
		B2578	yfiK	1.85966	Integral protein
		B2937	speB	1.87964	Polyamine biosynthesis
		B3390	aroK	2.47736	Amino acid biosynthesis
		B2678	proW	2.60067	Glycine betaine transporter
		B1260	trpA	2.7783	Tryptophan biosynthesis
		B1440	ydcS	3.23356	Periplasmic protein
		B1291	sapD	3.49409	Peptide transporter
		B3591	selA	9.19029	selenocysteine synthase
	Carbohydrade transport and metabolism
		B4239	treC	1.94765	Trehalose-6P hydrolase
		B1613	manA	2.2004	Mannose-6P isomerase
		B2739	ygbM	2.38189	Glyoxylate induced protein
		B1280	yciM	2.43956	Predicted N-acetylglucosaminyl transferase
		B2416	ptsI	2.5059	PTS enzyme I
		B2901	bglA	2.90466	6P-phosphoglucosidase
		B2388	glk	6.64647	Glucokinase
		B3176	mrsA	9.00567	Glucosamine mutase
		B2465	tktB	9.02414	Transketolase II
	Nucleotide transport and metabolism
		B2065	dcd	2.26406	dCTP deaminase
		B2508	guaB	2.82122	GMP biosynthesis
		B4177	purA	2.88015	AMP biosynthesis
		B2507	guaA	6.98822	GMP biosynthesis
		B0910	cmk	10.7814	Cytidylate kinase
	Lipid metabolism
		B3193	mlaD	1.77246	Phospholipid transporter
		B0418	pgpA	7.88435	Phosphatidylglycerophosphatase
General prediction and unknown
		B2991	hybF	1.70595	Putative hydrogenase maturation factor
		B0965	yccU	1.78159	Predicted CoA binding protein
		B1154	ycfK	1.84272	Predicted prophage protein
		B1234	ychK	1.85441	Contains lysophospholipase domain
		B1668	ydhS	1.93894	Conserved protein with NAD/FAD binding site
		B2117	molR	1.95115	Molybdate regulator split protein
		B2732	ygbA	2.00209	Predicted protein upregulated by nitrosative stress
		B3233	yhcB	2.02376	Inner membrane protein
		B1582	ynfA	2.09876	Inner membrane protein
		B2956	yggM	2.19053	Predicted protein
		B2898	ygfZ	2.24622	Folate binding protein
		B2003	yeeT	2.36968	Predicted prophage protein
		B1128	ycfD	2.37084	Conserved protein with ACR, cupin superfamily
		B1567	ydfW	2.55876	Predicted prophage protein
		B4050	pspG	2.60265	Phage shock, inner membrane protein
		B3085	ygjP	2.61239	Conserved metal dependent hydrolase
		B1203	ychF	3.27002	Predicted GTP binding protein
		B1132	hflD	3.47713	Lysogenization regulator
		B1065	yceL	3.85471	MFS permease
		B2604	yfiN	4.45339	Predicted diguanylate cyclase, inner membrane protein
		B3120	yhaB	5.99635	Conserved protein
		B186	yebV	10.0975	Conserved protein
		B0631	ybeD	13.9465	Predicted nuclease domain
		B0253	ykfA	15.8258	Prophage predicted protein
		B1664	ydhQ	65.2288	Predicted protein

## Sheet: Supplementary File 1B
Supplementary File 1B - related to Figure 1. Identification of previously reported cold sensitive ribosome biogenesis genes.
All genes presented have been reported as cold sensitive. The Comments column describes whether each gene deletion strain displayed cold sensitivity in our screen of the Keio collection.
	Gene	Modification	Comments	References
16S modifications	rsmH	m4C1402	Cold sensitive	1
	ksgA	m62A1518/m62A1519	Cold sensitive	2
23S modifications	rlmC	m5U747	Cold sensitive	This work
	rluC	Ψ955/Ψ2505/Ψ2580	No cold sensitivity	3
	rluD	Ψ1911/Ψ1915/Ψ1917	Cold sensitive	4
	rrmJ	Um2552	Not in Keio collection	5
	rluB	Ψ2685	No cold sensitivity	3,4
R-protein modifications	rimK	S6 glutamination	Cold sensitive	This work
RNA helicases	deaD	50S	Cold sensitive	6
	srmB	50S	No cold sensitivity	7
GTPases	rsgA	30S	Cold sensitive	8
	bipA	30S	Cold sensitive	9
Maturation factors	rbfA	30S	Cold sensitive	10
	rimP	30S	Cold sensitive	11
	rimM	30S	Cold sensitive	12
	yhbY	50S	Cold sensitive	3
Table References
1	Kimura S, Suzuki T. Fine-tuning of the ribosomal decoding center by conserved methyl-modifications in the Escherichia coli 16S rRNA. Nucleic Acids Res. 2010 Mar;38(4):1341–52. doi: 10.1093/nar/gkp1073.
2	Connolly K, Rife JP, Culver G. Mechanistic insight into the ribosome biogenesis functions of the ancient protein KsgA. Mol Microbiol. 2008 Dec;70(5):1062–75. doi: 10.1111/j.1365-2958.2008.06485.x.
3	Jiang M, Sullivan SM, Walker AK, Strahler JR, Andrews PC, Maddock JR. Identification of novel Escherichia coli ribosome-associated proteins using isobaric tags and multidimensional protein identification techniques. J Bacteriol. 2007 May;189(9):3434–44.
4	Huang L, Ku J, Pookanjanatavip M, Gu X, Wang D, Greene PJ, et al. Identification of two Escherichia coli pseudouridine synthases that show multisite specificity for 23S RNA. Biochemistry. 1998 Nov;37(45):15951–7.
5	Caldas T, Binet E, Bouloc P, Richarme G. Translational Defects of Escherichia coli Mutants Deficient in the Um2552 23S Ribosomal RNA Methyltransferase RrmJ/FTSJ. Biochem Biophys Res Commun. 2000 May;271(3):714–8.
6	Jones PG, Mitta M, Kim Y, Jiang W, Inouye M. Cold shock induces a major ribosomal-associated protein that unwinds double-stranded RNA in Escherichia coli. Proc Natl Acad Sci USA. 1996 Jan;93(1):76–80.
7	Charollais J, Pflieger D, Vinh J, Dreyfus M, Iost I. The DEAD-box RNA helicase SrmB is involved in the assembly of 50S ribosomal subunits in Escherichia coli. Mol Microbiol. 2003 Jun;48(5):1253–65.
8	Himeno H, Hanawa-Suetsugu K, Kimura T, Takagi K, Sugiyama W, Shirata S, et al. A novel GTPase activated by the small subunit of ribosome. Nucleic Acids Res. 2004 Oct;32(17):5303–9.
9	Pfennig P, Flower A. BipA is required for growth of Escherichia coli K12 at low temperature. Mol Genet Genomics. 2001 Oct;266(2):313–7.
10	Dammel CS, Noller HF. Suppression of a cold-sensitive mutation in 16S rRNA by overexpression of a novel ribosome-binding factor, RbfA. Genes Dev. 1995 Mar;9(5):626–37.
11	Nord S, Bylund GO, Lövgren JM, Wikström PM. The RimP Protein Is Important for Maturation of the 30S Ribosomal Subunit. J Mol Biol. 2009 Feb;386(3):742–53. doi: 10.1016/j.jmb.2008.12.076.
12	Lövgren JM, Bylund GO, Srivastava MK, Lundberg LAC, Persson OP, Wingsle G, et al. The PRC-barrel domain of the ribosome maturation protein RimM mediates binding to ribosomal protein S19 in the 30S ribosomal subunits. RNA. 2004 Nov;10(11):1798–812.
