# Supplementary figures and images for: Discovery of a small molecule that inhibits bacterial ribosome biogenesis
Source: eLife journal article supplement (doi:10.7554/elife.03574), 2014-09-18

**Figure 1 – figure supplement 1**

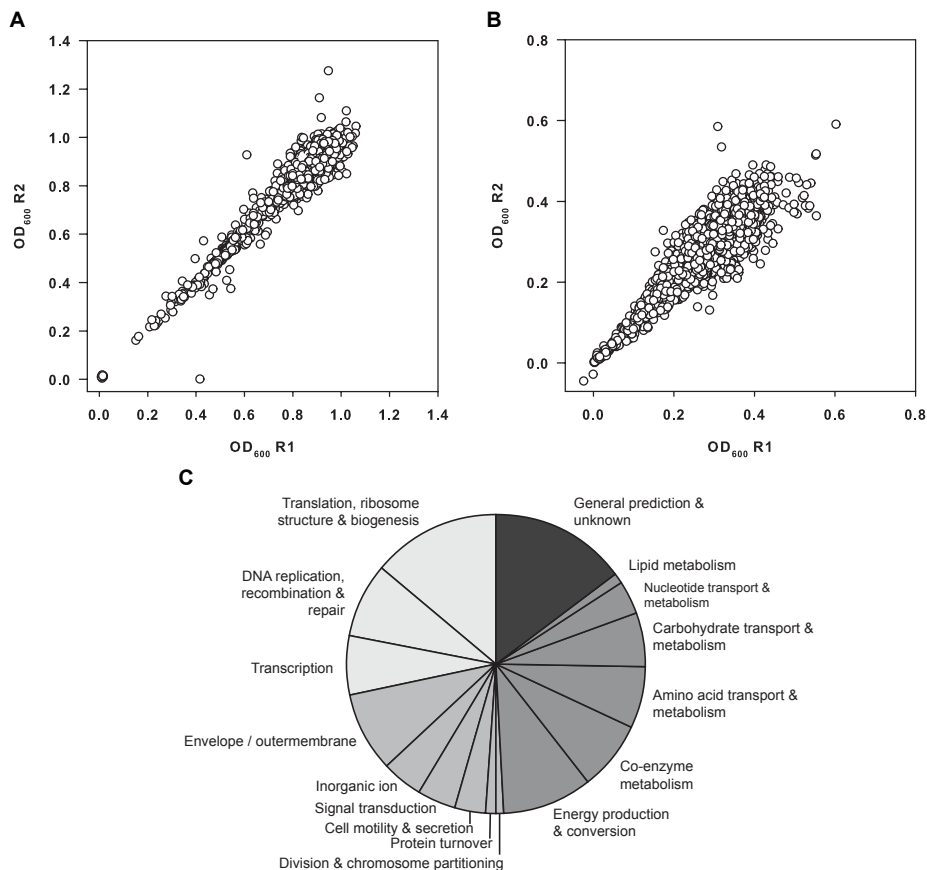

Supplement: supp [file elife_poa_e03574_Figure_1_figure_supplement_1.pdf › elife_poa_e03574_Figure_1_figure_supplement_1.pdf]

Figure 2 – figure supplement 1

**A**

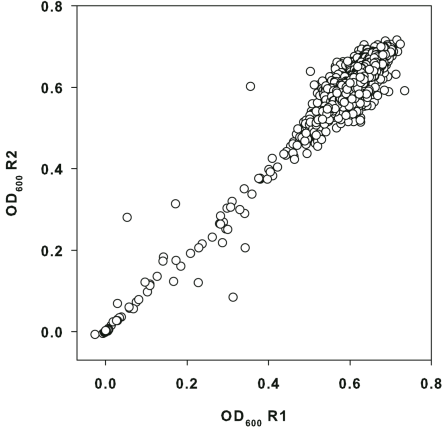

**B**

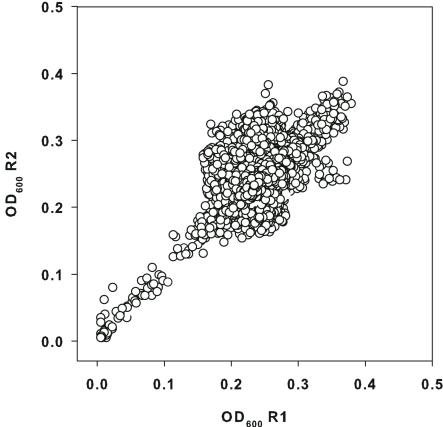

Supplement: supp [file elife_poa_e03574_Figure_2_figure_supplement_1.pdf › elife_poa_e03574_Figure_2_figure_supplement_1.pdf]

Figure 2 – figure supplement 2

A

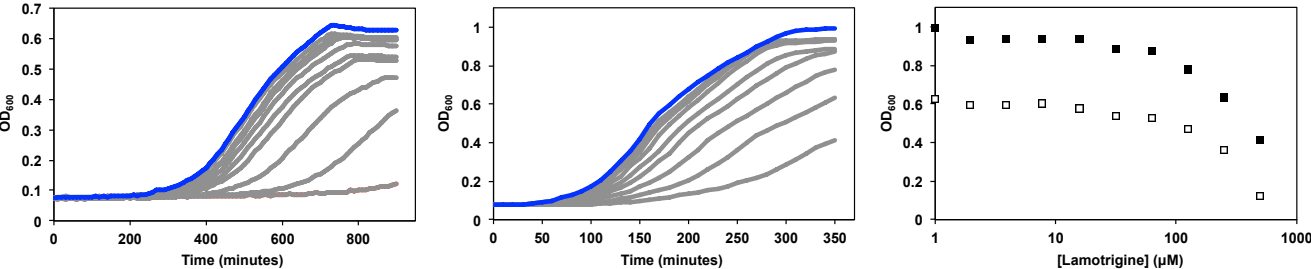

B

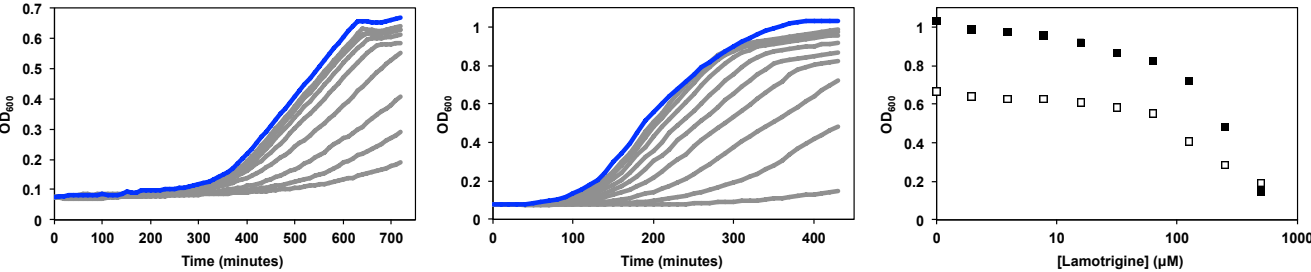

C

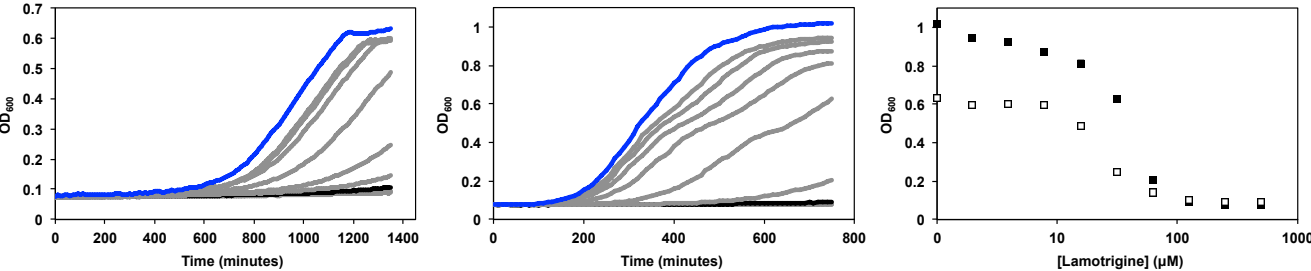

D

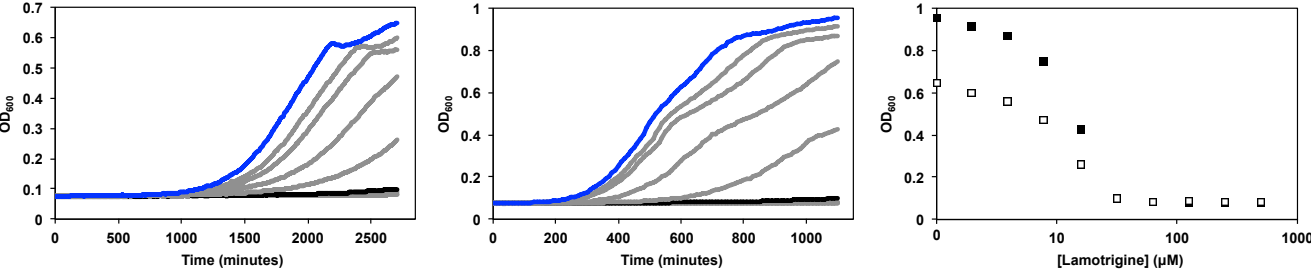

E

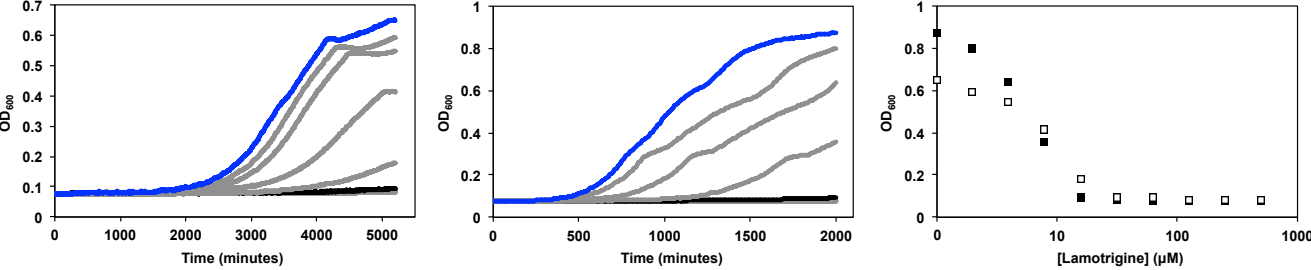

F

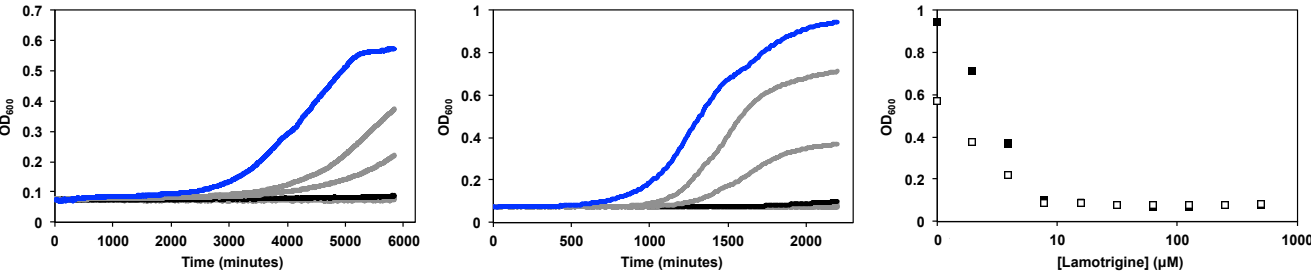

Supplement: supp [file elife_poa_e03574_Figure_2_figure_supplement_2.pdf › elife_poa_e03574_Figure_2_figure_supplement_2.pdf]

Figure 3 – figure supplement 1

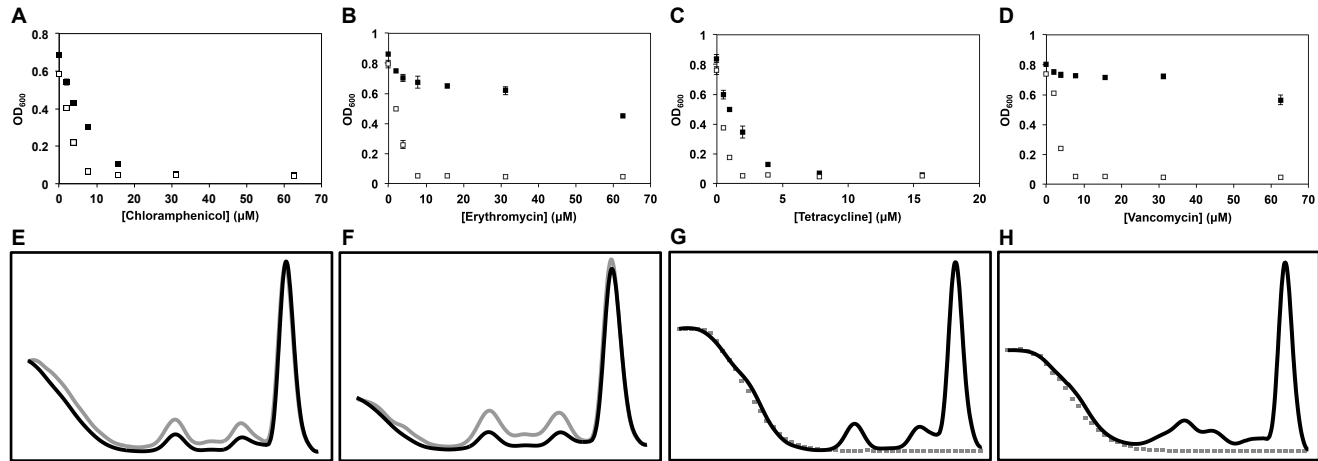

Supplement: supp [file elife_poa_e03574_Figure_3_figure_supplement_1.pdf › elife_poa_e03574_Figure_3_figure_supplement_1.pdf]

**Figure 4 – figure supplement 1**

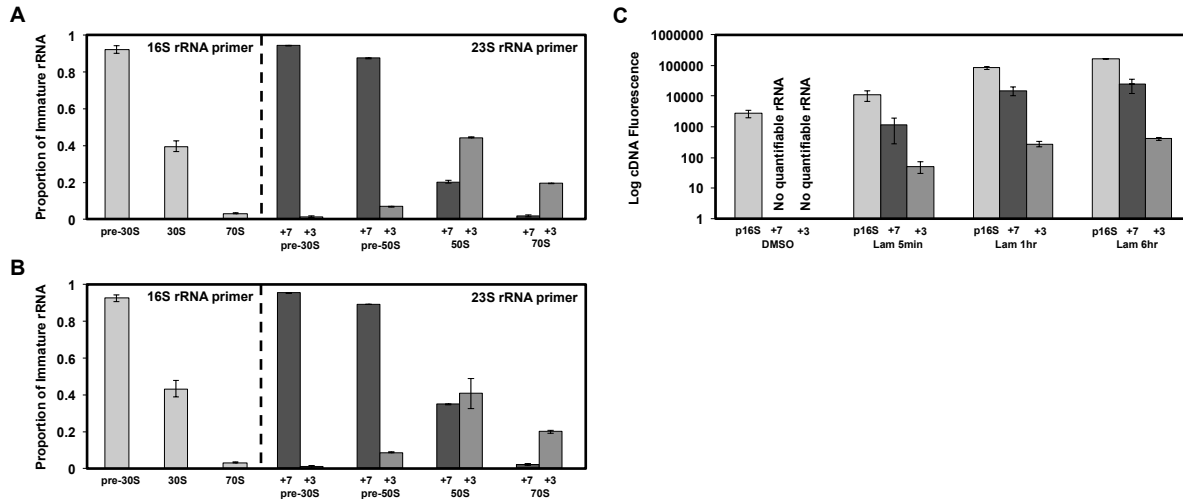

Supplement: supp [file elife_poa_e03574_Figure_4_figure_supplement_1.pdf › elife_poa_e03574_Figure_4_figure_supplement_1.pdf]

Figure 4 – figure supplement 2

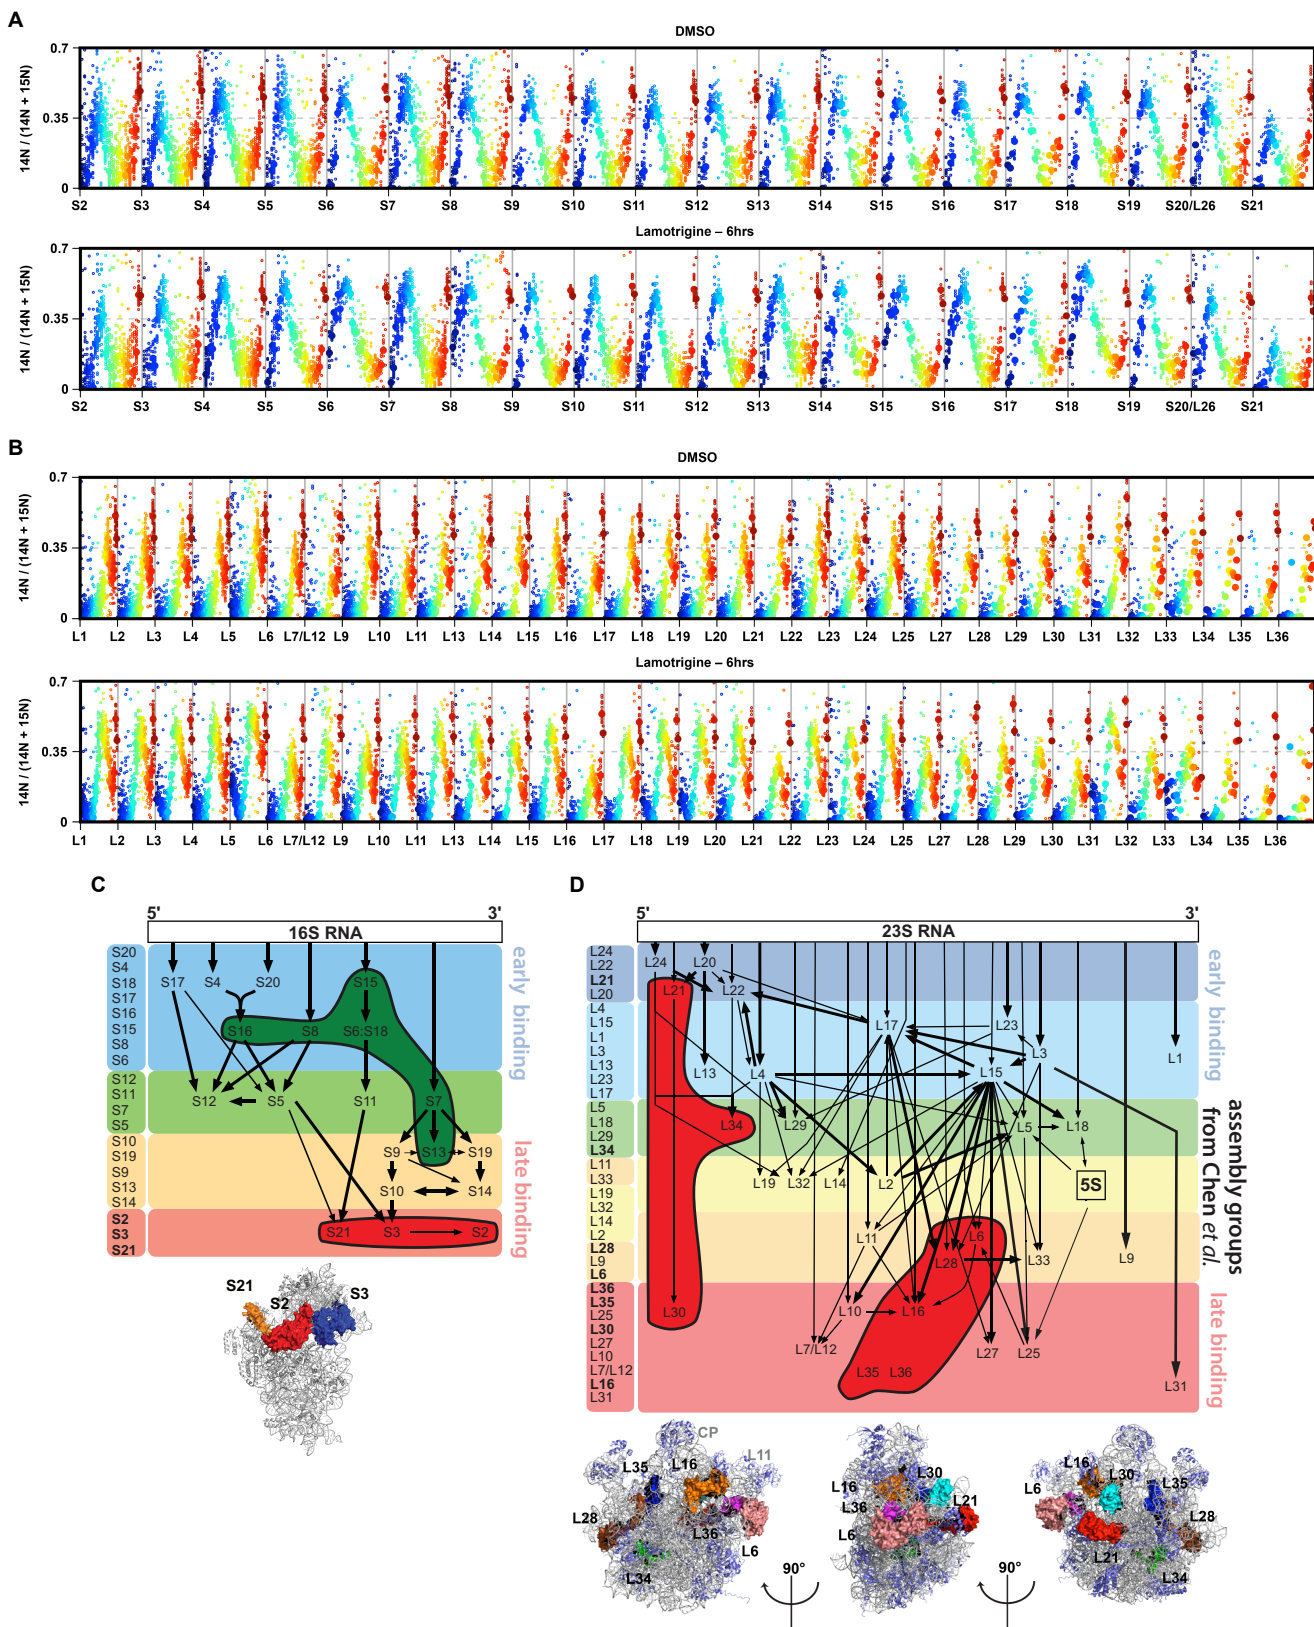

Supplement: supp [file elife_poa_e03574_Figure_4_figure_supplement_2.pdf › elife_poa_e03574_Figure_4_figure_supplement_2.pdf]

Figure 6 – figure supplement 1

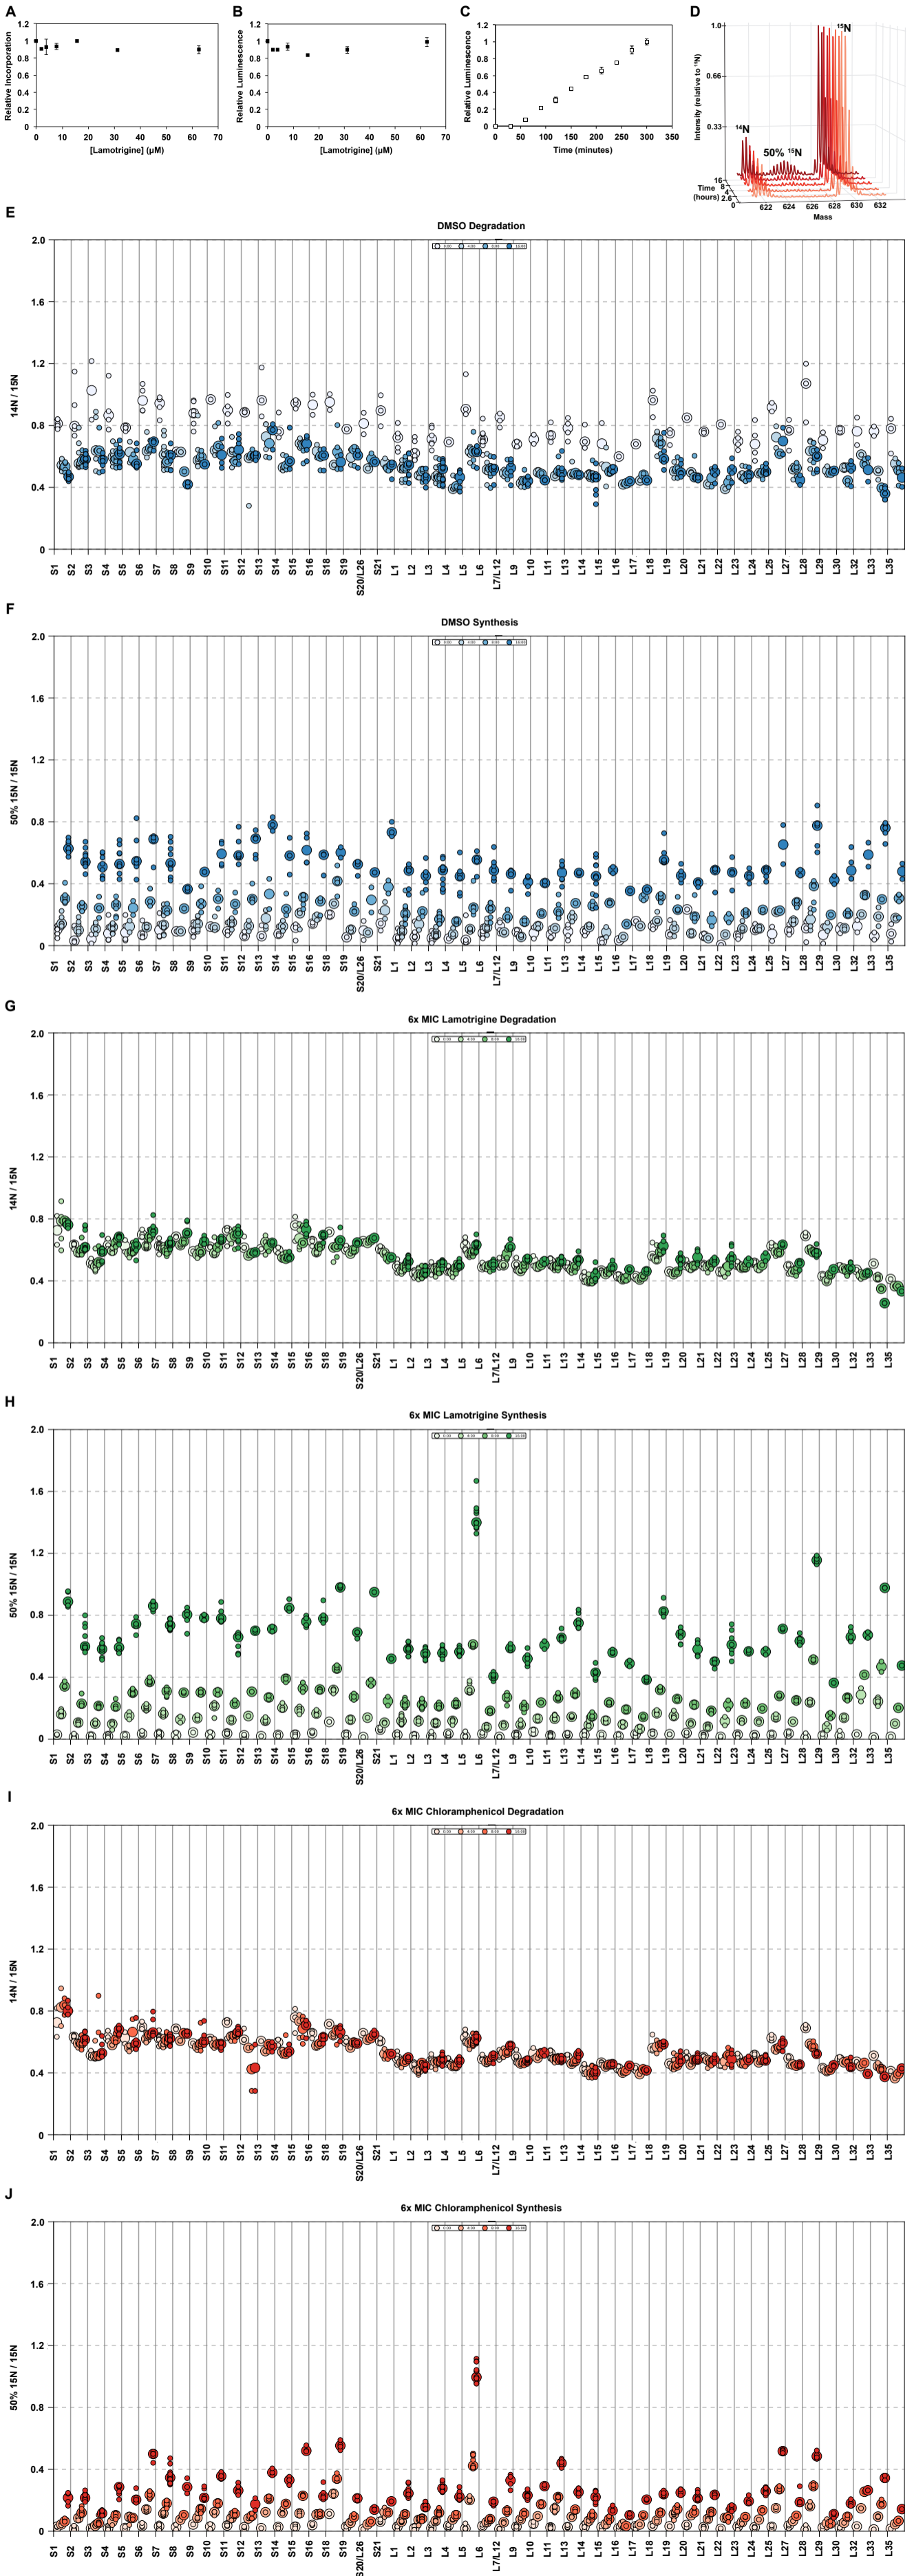

Supplement: supp [file elife_poa_e03574_Figure_6_figure_supplement_1.pdf › elife_poa_e03574_Figure_6_figure_supplement_1.pdf]
